# Supplementary material for: Chronic treatment with D2-antagonist haloperidol leads to inhibitory/excitatory imbalance in striatal D1-neurons
Source: PubMed Central journal article supplement (PMC10558446; doi:10.1038/s41398-023-02609-w), 2023-10-06
Supplement: 41398_2023_2609_MOESM2_ESM.pdf [file 41398_2023_2609_MOESM2_ESM.pdf]

Sup.Table S1 – List of all proteins quantified by proteomic screening of striatal samples from the vehicle and haloperidol-treated mice. A total of 93 proteins were found to be involved in neuronal pathways according to Reactome.

| Protein Accession Number | Protein Accession Name | Protein Name                                                      | CT#1     | CT#2     | CT#3     | CT#4     | Average CT    | Stdev CT    | % CV CT | 30HA#1   | 30HA#2   | 30HA#3   | 30HA#4   | 30HA#5   | Average 30HA | Stdev 30HA  | % CV 30HA | Neuronal System in Reactome |
|--------------------------|------------------------|-------------------------------------------------------------------|----------|----------|----------|----------|---------------|-------------|---------|----------|----------|----------|----------|----------|--------------|-------------|-----------|-----------------------------|
| 599C82A1A4:CA4:C1        | STXB1_MOUSE            | Syntaxin-binding protein 1                                        | 0,006214 | 0,006256 | 0,00632  | 0,006083 | 0,006218351   | 0,000100116 | 1,610   | 0,005783 | 0,005844 | 0,005614 | 0,00578  | 0,005688 | 0,00574184   | 9,03346E-05 | 1,573     | YES                         |
| P46460                   | NSF_MOUSE              | Vesicle-fusing ATPase                                             | 0,004252 | 0,004855 | 0,004785 | 0,004814 | 0,004676677   | 0,000284404 | 6,081   | 0,004895 | 0,004463 | 0,004666 | 0,004598 | 0,005032 | 0,004730902  | 0,000229548 | 4,852     | YES                         |
| Q77MM9                   | TBB2A_MOUSE            | Tubulin beta-2A chain                                             | 7,45E-05 | 0,000203 | 9,48E-05 | 0,000156 | 0,000131866   | 5,83762E-05 | 44,269  | 0,000375 | 0,000307 | 0,000228 | 0,000306 | 0,000305 | 0,000304347  | 5,22E-05    | 17,151    | YES                         |
| Q9WV92                   | E41L3_MOUSE            | Band 4.1-like protein 3                                           | 0,001513 | 0,001514 | 0,001291 | 0,001369 | 0,001421875   | 0,000110532 | 7,774   | 0,001548 | 0,001523 | 0,001418 | 0,00133  | 0,001384 | 0,00144043   | 9,25074E-05 | 6,422     | YES                         |
| Q9Z1B3                   | PLCB1_MOUSE            | 1-phosphatidylinositol 4,5-bisphosphate phosphodiesterase beta-1  | 0,000117 | 0,000131 | 0,000171 | 0,000141 | 0,000139854   | 2,28464E-05 | 16,336  | 0,000146 | 0,000144 | 0,000122 | 0,00014  | 0,000171 | 0,000144601  | 1,78105E-05 | 12,317    | YES                         |
| P08551                   | NFL_MOUSE              | Neurofilament light polypeptide                                   | 0,006362 | 0,005579 | 0,003533 | 0,004653 | 0,005031922   | 0,001218959 | 24,225  | 0,006073 | 0,005776 | 0,005469 | 0,005436 | 0,004224 | 0,005395614  | 0,000704225 | 13,052    | YES                         |
| P63017                   | HSP7C_MOUSE            | Heat shock cognate 71 kDa protein                                 | 0,004738 | 0,00523  | 0,004691 | 0,004857 | 0,004879099   | 0,000244038 | 5,002   | 0,005561 | 0,005523 | 0,005554 | 0,005712 | 0,005968 | 0,005663518  | 0,000185062 | 3,268     | YES                         |
| P17426                   | AP2A1_MOUSE            | AP-2 complex subunit alpha-1                                      | 0,001263 | 0,001328 | 0,001344 | 0,001296 | 0,00130752    | 3,58602E-05 | 2,743   | 0,001385 | 0,001353 | 0,001373 | 0,001375 | 0,001517 | 0,001400606  | 6,624E-05   | 4,729     | YES                         |
| Q88935                   | SYN1_MOUSE             | Synapsin-1                                                        | 0,004012 | 0,004173 | 0,004125 | 0,004076 | 0,004096457   | 6,91699E-05 | 1,689   | 0,004676 | 0,004194 | 0,004431 | 0,00439  | 0,004695 | 0,004477209  | 0,000210212 | 4,695     | YES                         |
| P61922                   | GABT_MOUSE             | 4-aminobutyrate aminotransferase, mitochondrial                   | 0,004859 | 0,005021 | 0,004626 | 0,004675 | 0,004795169   | 0,000181247 | 3,780   | 0,005201 | 0,005536 | 0,005242 | 0,005857 | 0,005262 | 0,005419508  | 0,00027795  | 5,129     | YES                         |
| P63318                   | KPCG_MOUSE             | Protein kinase C gamma type                                       | 0,000422 | 0,000414 | 0,000464 | 0,000459 | 0,000439699   | 2,51932E-05 | 5,730   | 0,000305 | 0,000384 | 0,000448 | 0,00042  | 0,000454 | 0,000402298  | 6,11973E-05 | 15,212    | YES                         |
| Q62108                   | DLG4_MOUSE             | Disks large homolog 4                                             | 0,000199 | 0,000187 | 0,000253 | 0,00022  | 0,000214911   | 2,88554E-05 | 13,427  | 0,000238 | 0,000201 | 0,000217 | 0,000212 | 0,000252 | 0,000223987  | 2,06611E-05 | 9,224     | YES                         |
| P68404                   | KPCB_MOUSE             | Protein kinase C beta type                                        | 0,000608 | 0,000556 | 0,000504 | 0,000534 | 0,000550352   | 4,3799E-05  | 7,958   | 0,000646 | 0,000491 | 0,000588 | 0,000652 | 0,000714 | 0,000618158  | 8,3997E-05  | 13,588    | YES                         |
| P11798                   | KCC2A_MOUSE            | Calcium/calmodulin-dependent protein kinase type II subunit alpha | 0,003212 | 0,003692 | 0,004424 | 0,003907 | 0,003808844   | 0,000502935 | 13,204  | 0,003381 | 0,00262  | 0,003635 | 0,003641 | 0,003773 | 0,003410144  | 0,00046373  | 13,599    | YES                         |
| P15105                   | GLNA_MOUSE             | Glutamine synthetase                                              | 0,003305 | 0,003388 | 0,003492 | 0,003689 | 0,003468564   | 0,000165396 | 4,768   | 0,003461 | 0,003449 | 0,003645 | 0,003449 | 0,003235 | 0,003447717  | 0,000145238 | 4,213     | YES                         |
| D3Z7P3                   | GLSK_MOUSE             | Glutaminase kidney isoform, mitochondrial                         | 0,000481 | 0,00049  | 0,00053  | 0,000514 | 0,000503858   | 2,2188E-05  | 4,404   | 0,000528 | 0,000502 | 0,000542 | 0,000567 | 0,000561 | 0,00054347   | 2,03825E-05 | 3,750     | YES                         |
| P46096                   | SYT1_MOUSE             | Synaptotagmin-1                                                   | 0,001939 | 0,002018 | 0,002119 | 0,002205 | 0,00207017    | 0,000116009 | 5,604   | 0,002244 | 0,001714 | 0,002055 | 0,002321 | 0,00224  | 0,002114686  | 0,00020459  | 11,566    | YES                         |
| Q8BWF0                   | SSDH_MOUSE             | Succinate-semialdehyde dehydrogenase, mitochondrial               | 0,001138 | 0,001162 | 0,001108 | 0,001145 | 0,001138248   | 1,25556E-05 | 1,982   | 0,001099 | 0,001236 | 0,001149 | 0,001058 | 0,001074 | 0,001123189  | 7,17988E-05 | 6,392     | YES                         |
| O70318                   | E41L2_MOUSE            | Band 4.1-like protein 2                                           | 0,000233 | 0,000271 | 0,000247 | 0,000239 | 0,000247401   | 2,67601E-05 | 6,774   | 0,000227 | 0,000284 | 0,000263 | 0,000259 | 0,000272 | 0,000260965  | 2,10209E-05 | 8,055     | YES                         |
| P48320                   | DCE2_MOUSE             | Glutamate decarboxylase 2                                         | 0,000267 | 0,000345 | 0,000236 | 0,000291 | 0,000284677   | 4,61364E-05 | 16,207  | 0,000284 | 0,000328 | 0,000396 | 0,000414 | 0,000345 | 0,00035305   | 5,2531E-05  | 14,879    | YES                         |
| Q9E597                   | RTN3_MOUSE             | Reticulon-3                                                       | 0,000496 | 0,000511 | 0,000501 | 0,000493 | 0,000500488   | 7,75915E-06 | 1,550   | 0,000562 | 0,000522 | 0,000489 | 0,000486 | 0,000489 | 0,000509667  | 3,28231E-05 | 6,440     | YES                         |
| Q64332                   | SYN2_MOUSE             | Synapsin-2                                                        | 0,000964 | 0,001091 | 0,001187 | 0,001124 | 0,001091463   | 9,37598E-05 | 8,590   | 0,000973 | 0,000873 | 0,001025 | 0,000889 | 0,001097 | 0,000971529  | 9,35788E-05 | 9,632     | YES                         |
| Q60634                   | FLOT2_MOUSE            | Flotillin-2                                                       | 0,000139 | 0,000148 | 0,000148 | 0,000164 | 0,000149879   | 1,01025E-05 | 6,740   | 0,000161 | 0,000144 | 0,000142 | 0,000161 | 0,000166 | 0,000154933  | 1,08639E-05 | 7,012     | YES                         |
| P62874                   | GBB1_MOUSE             | Guanine nucleotide-binding protein G(i)(G(s))/G(t) subunit beta-1 | 0,00045  | 0,000548 | 0,000732 | 0,000709 | 0,000609685   | 0,000134389 | 22,042  | 0,000465 | 0,000687 | 0,000517 | 0,000491 | 0,000554 | 0,000542662  | 8,6878E-05  | 16,010    | YES                         |
| P47738                   | ALDH2_MOUSE            | Aldehyde dehydrogenase, mitochondrial                             | 0,000509 | 0,000521 | 0,000447 | 0,000465 | 0,000485619   | 3,52729E-05 | 7,263   | 0,000454 | 0,00049  | 0,000507 | 0,000489 | 0,000488 | 0,000485497  | 1,95919E-05 | 4,035     | YES                         |
| Q9D6F9                   | TBB4A_MOUSE            | Tubulin beta-4A chain                                             | 0,001962 | 0,001942 | 0,001769 | 0,001784 | 0,00186391    | 0,000101975 | 5,471   | 0,002231 | 0,001998 | 0,00218  | 0,002188 | 0,001993 | 0,002117934  | 0,000113434 | 5,356     | YES                         |
| O08917                   | FLOT1_MOUSE            | Flotillin-1                                                       | 0,000141 | 0,000133 | 0,000123 | 0,000136 | 0,000133173   | 7,54113E-06 | 5,663   | 0,000136 | 0,000104 | 0,000137 | 0,000131 | 0,000131 | 0,000127839  | 1,36731E-05 | 10,696    | YES                         |
| P28652                   | KCC2B_MOUSE            | Calcium/calmodulin-dependent protein kinase type II subunit beta  | 0,000215 | 0,000256 | 0,000226 | 0,000231 | 0,000232248   | 1,71704E-05 | 7,393   | 0,000249 | 0,000225 | 0,000237 | 0,000254 | 0,000276 | 0,000248065  | 1,91794E-05 | 7,732     | YES                         |
| P43006                   | EAA2_MOUSE             | Excitatory amino acid transporter 2                               | 0,002515 | 0,002282 | 0,002285 | 0,002344 | 0,000235644   | 0,000109592 | 4,651   | 0,002575 | 0,002628 | 0,002498 | 0,002596 | 0,002615 | 0,002582495  | 5,13114E-05 | 1,987     | YES                         |
| P31324                   | KAP3_MOUSE             | cAMP-dependent protein kinase type II-beta regulatory subunit     | 0,000561 | 0,000492 | 0,000598 | 0,000503 | 0,000538335   | 4,95694E-05 | 9,208   | 0,000678 | 0,000505 | 0,000568 | 0,000599 | 0,000752 | 0,000629319  | 8,39399E-05 | 13,338    | YES                         |
| P60879                   | SNP25_MOUSE            | Synaptosomal-associated protein 25                                | 0,002368 | 0,002095 | 0,001983 | 0,002116 | 0,002140256   | 0,000162698 | 7,602   | 0,002373 | 0,002078 | 0,002337 | 0,002329 | 0,002174 | 0,002258014  | 0,000126274 | 5,592     | YES                         |
| Q64133                   | AOFA_MOUSE             | Amine oxidase [flavin-containing] A                               | 0,000452 | 0,000453 | 0,000429 | 0,000404 | 0,000434555   | 2,31299E-05 | 5,323   | 0,000365 | 0,000407 | 0,00044  | 0,000419 | 0,00038  | 0,000402256  | 3,01203E-05 | 7,488     | YES                         |
| P31650                   | S6A11_MOUSE            | Sodium- and chloride-dependent GABA transporter 3                 | 0,000674 | 0,000673 | 0,000499 | 0,000648 | 0,000623248   | 8,41015E-05 | 13,492  | 0,000649 | 0,000877 | 0,00071  | 0,000588 | 0,000554 | 0,000675264  | 0,000217381 | 18,864    | YES                         |
| P48318                   | DCE1_MOUSE             | Glutamate decarboxylase 1                                         | 0,000179 | 0,000207 | 0,000168 | 0,000183 | 0,000184199   | 1,62544E-05 | 8,824   | 0,000175 | 0,000173 | 0,000175 | 0,000196 | 0,000181 | 0,000180059  | 9,20938E-06 | 5,115     | YES                         |
| P68181                   | KAPCB_MOUSE            | cAMP-dependent protein kinase catalytic subunit beta              | 0,000165 | 0,000148 | 0,000184 | 0,000165 | 0,000165448   | 1,454E-05   | 8,788   | 0,000216 | 0,00019  | 0,000182 | 0,000184 | 0,000213 | 0,000197001  | 1,65879E-05 | 8,420     | YES                         |
| P08752                   | GNAI2_MOUSE            | Guanine nucleotide-binding protein G(i) subunit alpha-2           | 0,000441 | 0,000452 | 0,000442 | 0,000416 | 0,000437814   | 1,51511E-05 | 3,461   | 0,000416 | 0,000442 | 0,000432 | 0,00041  | 0,000408 | 0,000421368  | 1,47164E-05 | 3,493     | YES                         |
| Q9ERD7                   | TBB3_MOUSE             | Tubulin beta-3 chain                                              | 0,005836 | 0,005767 | 0,005491 | 0,005588 | 0,005670501   | 0,000158796 | 2,800   | 0,005922 | 0,005314 | 0,005205 | 0,006751 | 0,007086 | 0,006255601  | 0,000695559 | 11,119    | YES                         |
| Q35633                   | VIAAT_MOUSE            | Vesicular inhibitory amino acid transporter                       | 0,00029  | 0,000354 | 0,000299 | 0,000314 | 0,000314189   | 2,83908E-05 | 9,036   | 0,000285 | 0,000329 | 0,000323 | 0,000332 | 0,000296 | 0,000313102  | 2,14333E-05 | 6,845     | YES                         |
| Q9Z2Y3                   | HOME1_MOUSE            | Homein protein homolog 1                                          | 0,00015  | 0,000137 | 0,000227 | 0,000168 | 0,000170638   | 3,94951E-05 | 23,146  | 0,000181 | 0,000123 | 0,000139 | 0,000167 | 0,000192 | 0,000160262  | 2,90281E-05 | 18,113    | YES                         |
| Q3TXH4                   | VGLU1_MOUSE            | Vesicular glutamate transporter 1                                 | 0,000209 | 0,000189 | 0,000227 | 0,000209 | 0,000208607   | 1,54256E-05 | 7,395   | 0,000235 | 0,000204 | 0,000183 | 0,000171 | 0,000204 | 0,000199147  | 2,4427E-05  | 12,266    | YES                         |
| P62881                   | GBB5_MOUSE             | Guanine nucleotide-binding protein subunit beta-5                 | 0,000131 | 0,000122 | 0,000131 | 0,00013  | 0,000121858   | 4,14715E-06 | 3,225   | 0,00014  | 0,00013  | 0,000131 | 0,00014  | 0,000122 | 0,000132603  | 7,67913E-06 | 5,791     | YES                         |
| P62880                   | GBB2_MOUSE             | Guanine nucleotide-binding protein G(i)(G(s))/G(t) subunit beta-2 | 0,000463 | 0,000504 | 0,000592 | 0,000528 | 0,000521684   | 5,4236E-05  | 10,396  | 0,000409 | 0,000589 | 0,0005   | 0,000502 | 0,000521 | 0,000504357  | 6,42254E-05 | 12,734    | YES                         |
| Q35526                   | STX1A_MOUSE            | Syntaxin-1A                                                       | 0,000537 | 0,000434 | 0,000563 | 0,00046  | 0,000498275   | 6,13051E-05 | 12,303  | 0,000645 | 0,000524 | 0,000495 | 0,000528 | 0,000542 | 0,000546746  | 5,76716E-05 | 10,548    | YES                         |
| P56564                   | EAA1_MOUSE             | Excitatory amino acid transporter 1                               | 0,001149 | 0,00128  | 0,001425 | 0,001268 | 0,001280505   | 0,000113277 | 8,846   | 0,001023 | 0,001335 | 0,001215 | 0,001185 | 0,001386 | 0,001228773  | 0,000141962 | 11,553    | YES                         |
| P62204                   | CALM_MOUSE             | Calmodulin                                                        | 0,000688 | 0,000706 | 0,001445 | 0,000953 | 0,000961731   | 0,000340787 | 35,435  | 0,000467 | 0,000443 | 0,000456 | 0,000373 | 0,000457 | 0,000436502  | 3,82053E-05 | 8,753     | YES                         |
| P46097                   | SYT2_MOUSE             | Synaptotagmin-2                                                   | 0,000279 | 0,000314 | 0,000258 | 0,000275 | 0,000281516</ |             |         |          |          |          |          |          |              |             |           |                             |

|        |             |                                                                   |          |          |          |          |             |             |          |          |          |          |          |             |             |             |        |     |
|--------|-------------|-------------------------------------------------------------------|----------|----------|----------|----------|-------------|-------------|----------|----------|----------|----------|----------|-------------|-------------|-------------|--------|-----|
| Q9WV18 | GABR1_MOUSE | Gamma-aminobutyric acid type B receptor subunit 1                 | 4,1E-05  | 4,69E-05 | 3,45E-05 | 4,44E-05 | 4,17056E-05 | 5,3984E-06  | 12,944   | 5,11E-05 | 2,13E-05 | 3,81E-05 | 5,89E-05 | 3,71E-05    | 4,13026E-05 | 1,44357E-05 | 34,951 | YES |
| Q62418 | DBNL_MOUSE  | Drebrin-like protein                                              | 5,57E-05 | 5,5E-05  | 5,84E-05 | 5,79E-05 | 5,67504E-05 | 1,64507E-06 | 2,899    | 5,42E-05 | 4,67E-05 | 4,89E-05 | 5,46E-05 | 5,61E-05    | 5,20841E-05 | 4,06566E-06 | 7,806  | YES |
| Q8CGK7 | GNAL_MOUSE  | Guanine nucleotide-binding protein G(olf) subunit alpha           | 3,56E-05 | 4,11E-05 | 8,37E-05 | 4,43E-05 | 5,11846E-05 | 2,19724E-05 | 42,928   | 5,71E-05 | 1,08E-05 | 4,17E-05 | 7,14E-05 | 5,82E-05    | 5,15392E-05 | 2,63171E-05 | 51,241 | YES |
| Q6PH59 | CA2D2_MOUSE | Voltage-dependent calcium channel subunit alpha-2/delta-2         | 3,36E-05 | 7,54E-05 | 6,9E-05  | 7,28E-05 | 6,2728E-05  | 1,95758E-05 | 31,207   | 5,44E-05 | 6,5E-05  | 3,86E-05 | 6,81E-05 | 5,72E-05    | 6,18089E-05 | 1,64823E-05 | 26,667 | YES |
| Q6P9K9 | NRX3A_MOUSE | Neurexin-3                                                        | 0,000191 | 0,000205 | 0,00018  | 0,000185 | 0,000190411 | 1,056E-05   | 5,546    | 0,000209 | 0,000182 | 0,000186 | 0,000178 | 0,000197    | 0,000190603 | 1,26031E-05 | 6,612  | YES |
| P62482 | KCAB2_MOUSE | Voltage-gated potassium channel subunit beta-2                    | 6,67E-05 | 6,51E-05 | 5,2E-05  | 6,44E-05 | 6,20306E-05 | 6,75619E-06 | 10,892   | 6,13E-05 | 6,97E-05 | 5,81E-05 | 5,61E-05 | 5,72E-05    | 6,04916E-05 | 5,52142E-06 | 9,128  | YES |
| P35438 | NMD21_MOUSE | Glutamate receptor ionotropic, NMDA 1                             | 7,93E-05 | 7,98E-05 | 9,31E-05 | 8,29E-05 | 8,37793E-05 | 3,63199E-06 | 7,630    | 9,04E-05 | 6,72E-05 | 6,12E-05 | 6,77E-05 | 7,96E-05    | 7,32136E-05 | 1,16823E-05 | 15,956 | YES |
| Q92115 | CA2D3_MOUSE | Voltage-dependent calcium channel subunit alpha-2/delta-3         | 3,48E-05 | 2,91E-05 | 3,25E-05 | 2,7E-05  | 3,08493E-05 | 3,48093E-06 | 11,284   | 2,85E-05 | 3,24E-05 | 2,64E-05 | 3,05E-05 | 3,79E-05    | 3,11268E-05 | 4,36981E-06 | 14,039 | YES |
| Q61016 | GBG7_MOUSE  | Guanine nucleotide-binding protein G(i)/G(s)/G(o) subunit gamma-7 | 9,86E-05 | 8,06E-05 | 0,000136 | 7,77E-05 | 9,83134E-05 | 2,70015E-05 | 27,465   | 0,000101 | 0,000112 | 0,000102 | 0,000129 | 0,000151    | 0,000119053 | 2,10284E-05 | 17,663 | YES |
| Q80741 | GABR2_MOUSE | Gamma-aminobutyric acid type B receptor subunit 2                 | 6,19E-05 | 5,86E-05 | 5,7E-05  | 5,3E-05  | 5,76256E-05 | 3,72776E-06 | 6,469    | 6,37E-05 | 6,33E-05 | 5,05E-05 | 4,5E-05  | 4,64E-05    | 5,37797E-05 | 9,08901E-06 | 16,900 | YES |
| P84309 | ADCY5_MOUSE | Adenylate cyclase type 5                                          | 4,76E-05 | 4,32E-05 | 5,92E-05 | 3,66E-05 | 4,66322E-05 | 9,50241E-06 | 20,377   | 5,62E-05 | 4,28E-05 | 3,86E-05 | 6,64E-05 | 7,78E-05    | 5,63877E-05 | 1,62735E-05 | 28,860 | YES |
| Q922W9 | GRIA3_MOUSE | Glutamate receptor 3                                              | 4E-05    | 4,34E-05 | 6,78E-05 | 4,78E-05 | 4,97317E-05 | 1,24329E-05 | 25,000   | 4,83E-05 | 3,76E-05 | 2,82E-05 | 4,02E-05 | 4,55E-05    | 3,99642E-05 | 7,82767E-06 | 19,587 | YES |
| Q8K377 | LRRT1_MOUSE | Leucine-rich repeat transmembrane neuronal protein 1              | 1,28E-05 | 1,12E-05 | 9,98E-06 | 1,32E-05 | 1,17638E-05 | 1,46971E-06 | 12,493   | 1,78E-05 | 1,34E-05 | 8,97E-06 | 1,17E-05 | 1,16E-05    | 1,26931E-05 | 3,26522E-06 | 25,724 | YES |
| P63040 | CPLX1_MOUSE | Complexin-1                                                       | 1,34E-05 | 1,45E-05 | 1,75E-05 | 1,92E-05 | 1,61536E-05 | 2,6791E-06  | 16,585   | 1,46E-05 | 2,32E-05 | 1,97E-05 | 1,81E-05 | 1,45E-05    | 1,80223E-05 | 3,6694E-06  | 20,360 | YES |
| P70175 | DLG3_MOUSE  | Disks large homolog 3                                             | 2,74E-05 | 2,87E-05 | 3,23E-05 | 3,06E-05 | 2,97654E-05 | 1,21512E-06 | 7,140    | 3,1E-05  | 2,6E-05  | 2,66E-05 | 2,73E-05 | 3,32E-05    | 2,88138E-05 | 3,11042E-06 | 10,795 | YES |
| Q91X97 | NCALD_MOUSE | Neurocalcin-delta                                                 | 0,000251 | 0,000186 | 0,000212 | 0,000188 | 0,000209148 | 3,01075E-05 | 14,395   | 0,000237 | 0,00015  | 0,000211 | 0,000141 | 0,000132    | 0,000174536 | 4,68417E-05 | 26,838 | YES |
| Q64331 | MYO6_MOUSE  | Unconventional myosin-VI                                          | 2,91E-05 | 3,4E-05  | 2,94E-05 | 3,14E-05 | 3,09779E-05 | 2,27007E-06 | 7,328    | 3,27E-05 | 4,12E-05 | 3,31E-05 | 3,41E-05 | 2,12E-06    | 2,86594E-05 | 1,52363E-05 | 53,164 | YES |
| Q62083 | PICK1_MOUSE | PRKCA-binding protein                                             | 3,08E-05 | 3,19E-05 | 3,06E-05 | 3,03E-05 | 3,09002E-05 | 6,81269E-07 | 2,205    | 2,56E-05 | 2,25E-05 | 2,46E-05 | 2,92E-05 | 2,58E-05    | 2,55404E-05 | 2,43671E-06 | 9,541  | YES |
| Q99NE5 | RIMS1_MOUSE | Regulating synaptic membrane exocytosis protein 1                 | 2,6E-05  | 2,64E-05 | 2,76E-05 | 2,31E-05 | 2,57843E-05 | 1,90424E-06 | 7,385    | 3,32E-05 | 2,56E-05 | 2,23E-05 | 2,33E-05 | 2,55E-05    | 2,5983E-05  | 4,28392E-06 | 16,487 | YES |
| P62812 | GBRA1_MOUSE | Gamma-aminobutyric acid receptor subunit alpha-1                  | 1,87E-05 | 1,93E-05 | 1,55E-05 | 2,33E-05 | 1,17638E-05 | 1,46971E-06 | 16,751   | 2,32E-05 | 2,46E-05 | 2E-05    | 2,17E-05 | 1,6E-05     | 2,1101E-05  | 3,35149E-06 | 15,883 | YES |
| Q8VBV2 | KKCC1_MOUSE | Calcium/calmodulin-dependent protein kinase kinase 1              | 3,8E-05  | 4,05E-05 | 3,69E-05 | 4,32E-05 | 3,96407E-05 | 2,82164E-06 | 7,118    | 2,18E-05 | 2,2E-06  | 3,62E-05 | 3,89E-05 | 3,92E-05    | 2,76542E-05 | 1,59194E-05 | 57,566 | YES |
| P16388 | KCNA1_MOUSE | Potassium voltage-gated channel subfamily A member 1              | 5,21E-05 | 8,35E-06 | 3,9E-05  | 3,7E-05  | 3,41026E-05 | 1,84253E-05 | 54,029   | 5,05E-05 | 5,11E-05 | 4,6E-05  | 4,69E-05 | 4,05E-05    | 4,70138E-05 | 4,2305E-06  | 9,898  | YES |
| P63216 | GBG3_MOUSE  | Guanine nucleotide-binding protein G(i)/G(s)/G(o) subunit gamma-3 | 3,18E-05 | 3,64E-05 | 5,36E-05 | 3,79E-05 | 3,99257E-05 | 9,48285E-06 | 23,751   | 3,03E-05 | 2,7E-06  | 3,3E-05  | 3,23E-05 | 4,43E-05    | 2,85244E-05 | 1,54383E-05 | 54,123 | YES |
| Q4ACU6 | SHAN3_MOUSE | SH3 and multiple myrkin repeat domains protein 3                  | 5,22E-06 | 3,95E-06 | 4,86E-06 | 5,55E-06 | 4,8941E-06  | 6,87245E-07 | 14,042   | 5,45E-06 | 2,29E-06 | 3,96E-06 | 4,31E-06 | 7,14E-06    | 4,62978E-06 | 1,8021E-06  | 38,924 | YES |
| P63085 | MKO1_MOUSE  | Mitogen-activated protein kinase 1                                | 0,000145 | 0,000194 | 0,000241 | 0,000201 | 0,00019533  | 3,90304E-05 | 19,982   | 0,000189 | 0,000172 | 0,00017  | 0,000168 | 0,000189    | 0,000177756 | 1,03895E-05 | 5,845  | YES |
| O70589 | CSKP_MOUSE  | Periplar plasma membrane protein CASK                             | 1,8E-05  | 1,67E-05 | 1,82E-05 | 1,84E-05 | 1,77984E-05 | 7,46707E-07 | 4,195    | 2,05E-05 | 1,93E-05 | 1,82E-05 | 1,78E-05 | 1,86E-05    | 1,88885E-05 | 1,05557E-06 | 5,588  | YES |
| P23818 | GRIA1_MOUSE | Glutamate receptor 1                                              | 3,34E-05 | 8,43E-05 | 7,83E-05 | 9,59E-05 | 7,29535E-05 | 2,73904E-05 | 37,545   | 5,52E-05 | 4,88E-05 | 5,25E-05 | 2,36E-06 | 7,88E-05    | 4,75452E-05 | 2,78569E-05 | 58,590 | YES |
| Q9IHU4 | DYHC1_MOUSE | Cytoplasmic dynein 1 heavy chain 1                                | 0,001206 | 0,001316 | 0,001281 | 0,00122  | 0,001255846 | 5,18228E-05 | 4,127    | 0,001404 | 0,001264 | 0,001162 | 0,001199 | 0,001204    | 0,001246117 | 9,5261E-05  | 7,643  | YES |
| P16546 | SPTN1_MOUSE | Spectrin alpha chain, non-erythrocytic 1                          | 0,003291 | 0,00357  | 0,003678 | 0,003514 | 0,0001632   | 4,625       | 0,003785 | 0,003561 | 0,003372 | 0,003394 | 0,003825 | 0,003587547 | 0,000212316 | 5,918       | YES    |     |
| Q62261 | SPTB2_MOUSE | Spectrin beta chain, non-erythrocytic 1                           | 0,002733 | 0,003056 | 0,002911 | 0,002808 | 0,002877016 | 0,000139786 | 4,859    | 0,003245 | 0,002701 | 0,002825 | 0,00285  | 0,003035    | 0,002931369 | 0,000212405 | 7,246  | YES |
| Q8C8R3 | ANK2_MOUSE  | Ankryn-2                                                          | 0,000392 | 0,000447 | 0,000443 | 0,000441 | 0,000430533 | 2,60164E-05 | 6,043    | 0,000459 | 0,000449 | 0,000446 | 0,000444 | 0,000498    | 0,000458941 | 2,24095E-05 | 4,883  | YES |
| Q68FD5 | CLH1_MOUSE  | Clathrin heavy chain 1                                            | 0,005602 | 0,005855 | 0,005974 | 0,005775 | 0,005801523 | 0,000155982 | 2,689    | 0,006706 | 0,0059   | 0,005754 | 0,00619  | 0,006575    | 0,006224927 | 0,000413467 | 6,642  | YES |
| P19096 | FAS_MOUSE   | Fatty acid synthase                                               | 0,000602 | 0,000681 | 0,000663 | 0,000647 | 0,000640219 | 3,31424E-05 | 5,177    | 0,00071  | 0,000729 | 0,000652 | 0,000636 | 0,00064     | 0,000673284 | 4,27877E-05 | 6,355  | YES |
| Q9QYR6 | MAP1A_MOUSE | Microtubule-associated protein 1A                                 | 0,001278 | 0,00138  | 0,001323 | 0,001312 | 0,001323671 | 4,23696E-05 | 3,201    | 0,001394 | 0,001376 | 0,001274 | 0,001261 | 0,001284    | 0,001317861 | 6,20319E-05 | 4,707  | YES |
| I00001 | GFP_MALE    | 0                                                                 | 0,05402  | 0,040752 | 0,047206 | 0,037049 | 0,044756761 | 0,007466413 | 16,682   | 0,042783 | 0,049554 | 0,040484 | 0,046207 | 0,048966    | 0,045598922 | 0,003919351 | 8,595  | YES |
| Q88PN8 | DMXL2_MOUSE | DmX-like protein 2                                                | 0,000302 | 0,000289 | 0,000336 | 0,000324 | 0,000312782 | 2,13979E-05 | 6,841    | 0,000337 | 0,000262 | 0,000224 | 0,000306 | 0,000326    | 0,000290978 | 4,74605E-05 | 16,311 | YES |
| P14873 | MAP1B_MOUSE | Microtubule-associated protein 1B                                 | 0,000951 | 0,001032 | 0,00099  | 0,000973 | 0,000986663 | 3,43859E-05 | 3,485    | 0,001043 | 0,001037 | 0,000987 | 0,000961 | 0,001007    | 0,001007036 | 3,4121E-05  | 3,388  | YES |
| P20357 | MTAP2_MOUSE | Microtubule-associated protein 2                                  | 0,0007   | 0,000875 | 0,001057 | 0,000891 | 0,000880751 | 0,00014575  | 16,548   | 0,000906 | 0,000747 | 0,00081  | 0,000756 | 0,000874    | 0,00081866  | 7,02451E-05 | 8,580  | YES |
| Q61879 | MYH10_MOUSE | Myosin-10                                                         | 0,000396 | 0,000424 | 0,000478 | 0,000395 | 0,000423286 | 3,86794E-05 | 9,138    | 0,000482 | 0,00044  | 0,000396 | 0,000379 | 0,000494    | 0,000438168 | 5,06313E-05 | 11,555 | YES |
| Q99104 | MYO5A_MOUSE | Unconventional myosin-Va                                          | 0,000547 | 0,000578 | 0,000586 | 0,000545 | 0,000554066 | 2,10612E-05 | 3,734    | 0,000554 | 0,000589 | 0,000449 | 0,000563 | 0,000641    | 0,000579238 | 8,20165E-05 | 14,159 | YES |
| Q6PIC6 | AT1A3_MOUSE | Sodium/potassium-transporting ATPase subunit alpha-3              | 0,007029 | 0,006817 | 0,006084 | 0,006912 | 0,006710364 | 0,000426746 | 6,360    | 0,007744 | 0,008622 | 0,007515 | 0,007343 | 0,007566    | 0,000758005 | 0,000503334 | 6,488  | YES |
| P39053 | DYN1_MOUSE  | Dynamin-1                                                         | 0,002634 | 0,003103 | 0,002895 | 0,003009 | 0,002910386 | 0,000203    | 6,975    | 0,003457 | 0,003081 | 0,003219 | 0,003351 | 0,003625    | 0,003346837 | 0,000210211 | 6,281  | YES |
| Q807J1 | CAPS1_MOUSE | Calcium-dependent secretion activator 1                           | 0,000501 | 0,000517 | 0,000564 | 0,000555 | 0,000534259 | 3,00168E-05 | 5,618    | 0,000608 | 0,000519 | 0,000547 | 0,000559 | 0,000605    | 0,000567506 | 3,82415E-05 | 6,739  | YES |
| Q8CHC4 | SYNJ1_MOUSE | Synaptotagmin-1                                                   | 0,000813 | 0,000942 | 0,000853 | 0,000884 | 0,000872888 | 5,44753E-05 | 6,241    | 0,000925 | 0,000797 | 0,000788 | 0,000843 | 0,000853    | 0,00084132  | 5,47535E-05 | 6,508  | YES |
| Q99KI0 | ACON_MOUSE  | Aconitate hydratase, mitochondrial                                | 0,006951 | 0,006763 | 0,006165 | 0,006248 | 0,006531823 | 0,000384925 | 5,893    | 0,006947 | 0,007018 | 0,006478 | 0,006342 | 0,006873    | 0,006731682 | 0,000301834 | 4,484  | YES |
| P52480 | KPYM_MOUSE  | Pyruvate kinase PKM                                               | 0,015219 | 0,016206 | 0,014443 | 0,015264 | 0,015283086 | 0,00072163  | 4,722    | 0,015906 | 0,014907 | 0,015328 | 0,01532  | 0,015145    | 0,015321074 | 0,000368861 | 2,408  | YES |
| Q80553 | NFM_MOUSE   | Neurofilament medium polypeptide                                  | 0,002432 | 0,002223 | 0,001417 | 0,001857 | 0,001982147 | 0,000445482 | 22,475   | 0,002384 | 0,002673 | 0,002224 | 0,002097 | 0,00172     | 0,002219507 | 0,000352917 | 15,901 | YES |
| Q91V92 | ACLY_MOUSE  | ATP-citrate synthase                                              | 0,000806 | 0,000921 | 0,000854 | 0,000891 | 0,000867987 | 4,9342E-05  | 5,685    | 0,001053 | 0,000924 | 0,000924 | 0,000979 | 0,001095    | 0,000994947 | 7,66981E-05 | 7,709  | YES |
| Q9R0K7 | AT2B2_MOUSE | Plasma membrane calcium-transporting ATPase 2                     | 0,000611 | 0,000547 | 0,000581 | 0,000526 | 0,000566411 | 3,76508E-05 | 6,647    | 0,000676 | 0,000611 | 0,000531 | 0,000517 | 0,000584    | 0,000583754 | 6,399E-05   | 10,962 | YES |
| P17710 | HXK1_MOUSE  | Hexokinase-1                                                      | 0,005221 | 0,005734 | 0,005363 | 0,005463 | 0,00544528  | 0,000216612 | 3,978    | 0,00549  | 0,005633 | 0,005599 | 0,005376 | 0,005973    | 0,005614209 | 0,000224513 | 3,999  | YES |
| P07901 | HS90A_MOUSE | Heat shock protein HSP 90-alpha                                   | 0,002953 | 0,003339 | 0,002907 | 0,003043 | 0,003060621 | 0,000194199 | 6,345    |          |          |          |          |             |             |             |        |     |

|        |             |                                                              |          |          |          |          |             |             |          |          |          |          |          |             |             |             |        |
|--------|-------------|--------------------------------------------------------------|----------|----------|----------|----------|-------------|-------------|----------|----------|----------|----------|----------|-------------|-------------|-------------|--------|
| P60710 | ACTB_MOUSE  | Actin, cytoplasmic 1                                         | 0,006785 | 0,009546 | 0,009254 | 0,00973  | 0,008828896 | 0,001376474 | 15,591   | 0,010198 | 0,009738 | 0,010266 | 0,009807 | 0,010146    | 0,010030817 | 0,000241184 | 2,404  |
| Q6ZQ38 | CAND1_MOUSE | Cullin-associated NEDD8-dissociated protein 1                | 0,001202 | 0,001339 | 0,001367 | 0,001355 | 0,00131571  | 7,67037E-05 | 5,830    | 0,001449 | 0,001474 | 0,00131  | 0,001248 | 0,001427    | 0,001381406 | 9,75053E-05 | 7,058  |
| Q6PIE5 | AT1A2_MOUSE | Sodium/potassium-transporting ATPase subunit alpha-2         | 0,001551 | 0,001578 | 0,001236 | 0,001461 | 0,001456311 | 0,00015511  | 10,651   | 0,001884 | 0,002058 | 0,001822 | 0,001735 | 0,001729    | 0,001845457 | 0,000135188 | 7,325  |
| Q60864 | STIP1_MOUSE | Sodium-induced-phosphoprotein 1                              | 0,001056 | 0,001181 | 0,001057 | 0,001111 | 0,001101105 | 5,91157E-05 | 5,369    | 0,001089 | 0,001036 | 0,001152 | 0,00115  | 0,001168    | 0,001119074 | 5,51624E-05 | 4,929  |
| O54991 | CNTP1_MOUSE | Contactin-associated protein 1                               | 0,000615 | 0,00066  | 0,000499 | 0,000612 | 0,000596494 | 6,8763E-05  | 11,528   | 0,000574 | 0,000665 | 0,000593 | 0,000616 | 0,000582    | 0,000606016 | 3,63305E-05 | 5,995  |
| P48722 | HS74L_MOUSE | Heat shock 70 kDa protein 4L                                 | 0,000722 | 0,000865 | 0,000776 | 0,000811 | 0,000793156 | 6,01132E-05 | 7,579    | 0,000903 | 0,000807 | 0,000792 | 0,000868 | 0,000893    | 0,000865328 | 4,35145E-05 | 5,029  |
| P58252 | EF2_MOUSE   | Elongation factor 2                                          | 0,000812 | 0,000976 | 0,000866 | 0,00091  | 0,000890979 | 6,93616E-05 | 7,785    | 0,000906 | 0,000906 | 0,000895 | 0,000829 | 0,000945    | 0,000896307 | 4,20083E-05 | 4,687  |
| Q11011 | PSA_MOUSE   | Prolymucin-sensitive aminopeptidase                          | 0,001194 | 0,00131  | 0,00127  | 0,001216 | 0,001247388 | 5,24094E-05 | 4,202    | 0,001303 | 0,001162 | 0,001236 | 0,001204 | 0,001348    | 0,001250563 | 7,49615E-05 | 5,994  |
| P19246 | NFH_MOUSE   | Neurofilament heavy polypeptide                              | 0,001397 | 0,001264 | 0,000815 | 0,001007 | 0,001121004 | 0,000260269 | 23,217   | 0,001414 | 0,001528 | 0,00126  | 0,001257 | 0,000995    | 0,001290645 | 0,000200577 | 15,541 |
| Q4KMM3 | OXR1_MOUSE  | Oxidation resistance protein 1                               | 0,000251 | 0,000314 | 0,000289 | 0,000329 | 0,000295747 | 3,41663E-05 | 11,553   | 0,000358 | 0,000293 | 0,000304 | 0,000304 | 0,000339    | 0,000319674 | 2,76613E-05 | 8,653  |
| P13595 | NCAM1_MOUSE | Neural cell adhesion molecule 1                              | 0,003037 | 0,003621 | 0,003147 | 0,003549 | 0,003338629 | 0,000289683 | 8,677    | 0,003525 | 0,003709 | 0,003709 | 0,003847 | 0,003804    | 0,003718641 | 0,000123811 | 3,329  |
| P50396 | GDIA_MOUSE  | Rab GDP dissociation inhibitor alpha                         | 0,002325 | 0,002687 | 0,002496 | 0,002578 | 0,002521703 | 0,000152547 | 6,049    | 0,002789 | 0,002659 | 0,003005 | 0,00314  | 0,003065    | 0,002931594 | 0,000200779 | 6,849  |
| Q9QW16 | SRCN1_MOUSE | SRC kinase signaling inhibitor 1                             | 0,000333 | 0,000335 | 0,000356 | 0,000316 | 0,000334764 | 1,62108E-05 | 4,842    | 0,000384 | 0,000253 | 0,000325 | 0,000316 | 0,00034     | 0,000323288 | 4,72553E-05 | 14,617 |
| Q92019 | WDR7_MOUSE  | WD repeat-containing protein 7                               | 0,00018  | 0,000187 | 0,000194 | 0,00019  | 0,000187666 | 5,98281E-06 | 3,188    | 0,000196 | 0,000167 | 0,000169 | 0,000176 | 0,000184    | 0,000178179 | 1,19772E-05 | 6,722  |
| P16330 | CN37_MOUSE  | 2',3'-cyclic-nucleotide 3'-phosphodiesterase                 | 0,012819 | 0,012382 | 0,009525 | 0,011584 | 0,011577604 | 0,001460751 | 12,617   | 0,012944 | 0,013101 | 0,013659 | 0,013336 | 0,010646    | 0,012737117 | 0,001199815 | 9,420  |
| P63038 | CH60_MOUSE  | 60 kDa heat shock protein, mitochondrial                     | 0,002539 | 0,002597 | 0,002333 | 0,002577 | 0,002511541 | 0,000121479 | 4,837    | 0,002432 | 0,002529 | 0,002423 | 0,002386 | 0,002482    | 0,002446513 | 5,81965E-05 | 2,379  |
| Q64521 | GPDH_MOUSE  | Glycerol-3-phosphate dehydrogenase, mitochondrial            | 0,000846 | 0,001058 | 0,00099  | 0,001023 | 0,000979341 | 9,34696E-05 | 9,544    | 0,000842 | 0,000842 | 0,000896 | 0,000874 | 0,000883    | 0,000867389 | 2,44673E-05 | 2,821  |
| P56399 | UBP5_MOUSE  | Ubiquitin carboxyl-terminal hydrolase 5                      | 0,001265 | 0,001325 | 0,001304 | 0,001257 | 0,001287813 | 3,26023E-05 | 2,532    | 0,001236 | 0,001259 | 0,001276 | 0,001333 | 0,001396    | 0,001295972 | 6,28079E-05 | 4,846  |
| Q8K1M6 | DNM1L_MOUSE | Dynamin-1-like protein                                       | 0,001081 | 0,001219 | 0,001178 | 0,001157 | 0,001158917 | 5,77138E-05 | 4,980    | 0,001218 | 0,001099 | 0,00111  | 0,001071 | 0,001206    | 0,001140721 | 6,66239E-05 | 5,841  |
| P07724 | ALBU_MOUSE  | Serum albumin                                                | 0,004826 | 0,002757 | 0,003824 | 0,004026 | 0,003858213 | 0,000852055 | 22,084   | 0,002402 | 0,002001 | 0,002228 | 0,001767 | 0,002513    | 0,002182405 | 0,000302285 | 13,851 |
| Q99P72 | RTN4_MOUSE  | Reticulon-4                                                  | 0,00042  | 0,000412 | 0,000393 | 0,000382 | 0,00040187  | 1,7221E-05  | 4,285    | 0,00049  | 0,000431 | 0,000433 | 0,000424 | 0,000439    | 0,000443476 | 2,65411E-05 | 5,985  |
| P97427 | DPYL1_MOUSE | Dihydropyrimidinase-related protein 1                        | 0,001071 | 0,001198 | 0,001153 | 0,001173 | 0,001148923 | 5,48545E-05 | 4,774    | 0,001267 | 0,001178 | 0,001293 | 0,001378 | 0,001369    | 0,001297019 | 8,17324E-05 | 6,302  |
| P09411 | PGK1_MOUSE  | Phosphoglycerate kinase 1                                    | 0,003393 | 0,003204 | 0,003471 | 0,003575 | 0,003410689 | 0,000157025 | 4,604    | 0,003126 | 0,002888 | 0,003249 | 0,003372 | 0,003097    | 0,003146385 | 0,000180811 | 5,747  |
| P58281 | OPA1_MOUSE  | Dynamin-like 120 kDa protein, mitochondrial                  | 0,000368 | 0,000393 | 0,000401 | 0,000382 | 0,000385751 | 1,41619E-05 | 3,671    | 0,000394 | 0,000387 | 0,000392 | 0,00039  | 0,000473    | 0,00040748  | 3,68995E-05 | 9,056  |
| P05202 | AATM_MOUSE  | Aspartate aminotransferase, mitochondrial                    | 0,009099 | 0,008805 | 0,008577 | 0,008569 | 0,000249427 | 2,846       | 0,008956 | 0,008156 | 0,008094 | 0,007845 | 0,007662 | 0,008142712 | 0,000495767 | 6,088       |        |
| Q8VDN2 | AT1A1_MOUSE | Sodium/potassium-transporting ATPase subunit alpha-1         | 0,003156 | 0,003035 | 0,003298 | 0,00293  | 0,0031048   | 0,000158274 | 5,098    | 0,003559 | 0,003264 | 0,003337 | 0,003376 | 0,003452123 | 0,000206279 | 5,975       |        |
| P47857 | PFKAM_MOUSE | ATP-dependent 6-phosphofructokinase, muscle type             | 0,00126  | 0,001266 | 0,001211 | 0,001138 | 0,001218875 | 5,9289E-05  | 4,864    | 0,001374 | 0,00128  | 0,001335 | 0,001284 | 0,001367    | 0,001328121 | 4,45945E-05 | 3,358  |
| Q70133 | DHX9_MOUSE  | ATP-dependent RNA helicase A                                 | 0,000148 | 0,000175 | 0,000162 | 0,00014  | 0,000156378 | 1,56503E-05 | 10,008   | 0,000128 | 0,000115 | 0,000118 | 0,000149 | 0,000146    | 0,000130874 | 1,57884E-05 | 12,064 |
| O88342 | WDR1_MOUSE  | WD repeat-containing protein 1                               | 0,000829 | 0,000948 | 0,000834 | 0,00097  | 0,000895384 | 7,19123E-05 | 8,286    | 0,000874 | 0,000802 | 0,000873 | 0,000829 | 0,000844    | 0,000844389 | 3,06885E-05 | 3,634  |
| Q61699 | HS105_MOUSE | Heat shock protein 105 kDa                                   | 0,000603 | 0,000703 | 0,000688 | 0,000646 | 0,000660074 | 4,4879E-05  | 6,799    | 0,000702 | 0,000757 | 0,000691 | 0,000656 | 0,000801    | 0,000721496 | 5,73457E-05 | 7,948  |
| P38647 | GRP75_MOUSE | Stress-70 protein, mitochondrial                             | 0,001864 | 0,002632 | 0,002322 | 0,002347 | 0,002313527 | 0,000326176 | 14,099   | 0,002339 | 0,002419 | 0,001881 | 0,002325 | 0,00258     | 0,002308637 | 0,000259639 | 11,246 |
| P27773 | PDI3A_MOUSE | Protein disulfide-isomerase A3                               | 0,00098  | 0,001071 | 0,000937 | 0,000991 | 0,000994964 | 5,56913E-05 | 5,597    | 0,000943 | 0,000936 | 0,000995 | 0,000992 | 0,000957    | 0,000952423 | 2,53763E-05 | 2,664  |
| Q92164 | VPP1_MOUSE  | V-type proton ATPase 116 kDa subunit a isoform 1             | 0,00238  | 0,002586 | 0,00265  | 0,002606 | 0,002555353 | 0,000120269 | 4,707    | 0,002839 | 0,002588 | 0,002549 | 0,002586 | 0,002929    | 0,002698267 | 0,000173465 | 6,429  |
| Q62P13 | UBE2O_MOUSE | (E3-independent) E2 ubiquitin-conjugating enzyme UBE2O       | 2,45E-05 | 2,75E-05 | 2,69E-05 | 2,77E-05 | 2,66297E-05 | 1,48364E-06 | 5,571    | 2,99E-05 | 2,49E-05 | 2,93E-05 | 3,32E-05 | 3,16E-05    | 2,97846E-05 | 3,12427E-06 | 10,490 |
| P26443 | DHE3_MOUSE  | Glutamate dehydrogenase 1, mitochondrial                     | 0,004079 | 0,004234 | 0,003934 | 0,004158 | 0,004101126 | 0,00012814  | 3,125    | 0,004238 | 0,003619 | 0,004677 | 0,004634 | 0,004086    | 0,004250928 | 0,000434421 | 10,219 |
| Q8BHN3 | GANAB_MOUSE | Neutral alpha-glucosidase AB                                 | 0,000198 | 0,000191 | 0,000198 | 0,000205 | 0,000198036 | 5,69826E-06 | 2,877    | 0,000209 | 0,000183 | 0,000194 | 0,000186 | 0,000193    | 0,000192963 | 1,01205E-05 | 5,245  |
| Q8R0Y6 | AL11L_MOUSE | Cytosolic 10-formyltetrahydrofolate dehydrogenase            | 0,000595 | 0,000648 | 0,000568 | 0,00061  | 0,00060509  | 3,33705E-05 | 5,515    | 0,000584 | 0,000651 | 0,000599 | 0,00058  | 0,000571    | 0,00059687  | 3,19124E-05 | 5,347  |
| Q91VD9 | NDU51_MOUSE | NADH-ubiquinone oxidoreductase 75 kDa subunit, mitochondrial | 0,001944 | 0,00182  | 0,00175  | 0,001689 | 0,001800949 | 0,000190668 | 6,089    | 0,001729 | 0,001797 | 0,001722 | 0,00172  | 0,001807    | 0,001754896 | 4,30225E-05 | 2,452  |
| Q04447 | KCRB_MOUSE  | Creatine kinase B-type                                       | 0,007275 | 0,006526 | 0,009916 | 0,007795 | 0,007877782 | 0,001455007 | 18,470   | 0,006809 | 0,005586 | 0,005646 | 0,006498 | 0,0061474   | 0,006142549 | 0,000530995 | 8,645  |
| Q922H5 | E41L1_MOUSE | Band 4.1-like protein 1                                      | 0,000371 | 0,00041  | 0,000418 | 0,000414 | 0,000403061 | 2,174E-05   | 5,394    | 0,000413 | 0,000428 | 0,000436 | 0,000421 | 0,000485    | 0,000436749 | 2,85015E-05 | 6,526  |
| P20029 | GRP78_MOUSE | 78 kDa glucose-regulated protein                             | 0,001603 | 0,001769 | 0,001689 | 0,001617 | 0,001669394 | 7,65355E-05 | 4,585    | 0,001721 | 0,001709 | 0,00171  | 0,001615 | 0,001922    | 0,001735561 | 0,000112766 | 6,497  |
| Q8B298 | DYN3_MOUSE  | Dynamin-3                                                    | 0,000244 | 0,000249 | 0,000245 | 0,000257 | 0,000248618 | 6,27216E-06 | 2,523    | 0,000283 | 0,000298 | 0,000308 | 0,000295 | 0,000322    | 0,000301419 | 1,45632E-05 | 4,832  |
| Q8K0U4 | HS12A_MOUSE | Heat shock 70 kDa protein 12A                                | 0,00214  | 0,002023 | 0,001715 | 0,002061 | 0,001984827 | 0,000186056 | 9,374    | 0,002165 | 0,001841 | 0,001952 | 0,002073 | 0,00189     | 0,001984326 | 0,00013305  | 6,705  |
| P70704 | AT8A1_MOUSE | Phospholipid-transporting ATPase IA                          | 0,000267 | 0,000339 | 0,000324 | 0,000304 | 0,000308563 | 3,11638E-05 | 10,100   | 0,000299 | 0,000314 | 0,000287 | 0,000302 | 0,000336    | 0,000307609 | 1,8468E-05  | 6,004  |
| P14824 | ANXA6_MOUSE | Annexin A6                                                   | 0,000457 | 0,000495 | 0,000478 | 0,000485 | 0,000478807 | 1,62976E-05 | 3,404    | 0,000529 | 0,000511 | 0,000513 | 0,000512 | 0,000521    | 0,000516982 | 7,57352E-06 | 1,465  |
| Q9EQF6 | DPYL5_MOUSE | Dihydropyrimidinase-related protein 5                        | 0,000375 | 0,000421 | 0,000353 | 0,00041  | 0,000389787 | 3,14045E-05 | 8,057    | 0,000459 | 0,000439 | 0,000485 | 0,000486 | 0,000403    | 0,000454768 | 3,47756E-05 | 7,647  |
| Q8BH59 | CMC1_MOUSE  | Calcium-binding mitochondrial carrier protein Aralar1        | 0,002746 | 0,002762 | 0,002644 | 0,002561 | 0,002678419 | 9,41184E-05 | 3,514    | 0,002428 | 0,002306 | 0,002409 | 0,002423 | 0,002484    | 0,002410282 | 6,48548E-05 | 2,691  |
| P40142 | TKT_MOUSE   | Transketolase                                                | 0,001911 | 0,00213  | 0,001793 | 0,001974 | 0,001951881 | 0,000140088 | 7,177    | 0,00197  | 0,00193  | 0,002083 | 0,002083 | 0,001893    | 0,0019915   | 8,76994E-05 | 4,404  |
| P46660 | AINX_MOUSE  | Alpha-internexin                                             | 0,002562 | 0,002236 | 0,001572 | 0,001751 | 0,002030588 | 0,000452092 | 22,264   | 0,002422 | 0,002336 | 0,00217  | 0,002172 | 0,001868    | 0,002193378 | 0,000211683 | 9,651  |
| P03995 | GFAP_MOUSE  | Glial fibrillary acidic protein                              | 0,001829 | 0,00233  | 0,001511 | 0,002028 | 0,001924416 | 0,000344154 | 17,884   | 0,001717 | 0,001604 | 0,002063 | 0,001753 | 0,001431    | 0,001713494 | 0,000232173 | 13,550 |
| Q9QYC0 | ADDA_MOUSE  | Alpha-adducin                                                | 0,000578 | 0,000688 | 0,000637 | 0,000613 | 0,000629238 | 4,65096E-05 | 7,391    | 0,000646 | 0,000585 | 0,000611 | 0,000613 | 0,000695    | 0,000630117 | 4,24313E-05 | 6,734  |
| Q9WUB3 | PYGM_MOUSE  | Glycogen phosphorylase, muscle form                          | 0,000555 | 0,000591 | 0,000477 | 0,000555 | 0,000544357 | 4,7929E-05  | 8,805    | 0,000594 | 0,000652 | 0,0006   | 0,000529 | 0,00051     | 0,00057688  | 5           |        |

|        |             |                                                                                |          |          |          |          |             |             |        |          |          |          |            |           |              |             |        |
|--------|-------------|--------------------------------------------------------------------------------|----------|----------|----------|----------|-------------|-------------|--------|----------|----------|----------|------------|-----------|--------------|-------------|--------|
| P57780 | ACTN4_MOUSE | Alpha-actinin-4                                                                | 6,24E-05 | 6,39E-05 | 7,45E-05 | 5,82E-05 | 6,4731E-05  | 6,94113E-06 | 10,723 | 6,08E-05 | 5,67E-05 | 6,14E-05 | 5,32E-05   | 6,16E-05  | 5,87364E-05  | 3,70385E-06 | 6,306  |
| P35564 | CALX_MOUSE  | Calnexin                                                                       | 0,00074  | 0,000807 | 0,000731 | 0,000752 | 0,000757323 | 3,39439E-05 | 4,482  | 0,000766 | 0,000815 | 0,000794 | 0,000741   | 0,000819  | 0,000786992  | 3,29794E-05 | 4,191  |
| Q9WUA3 | PFKAP_MOUSE | ATP-dependent 6-phosphofructokinase, platelet type                             | 0,000617 | 0,000607 | 0,000596 | 0,000624 | 0,000610804 | 1,19924E-05 | 1,963  | 0,000742 | 0,000685 | 0,000711 | 0,00073    | 0,00076   | 0,00072538   | 2,89239E-05 | 3,987  |
| Q91WC3 | ACSL6_MOUSE | Long-chain-fatty-acid--CoA ligase 6                                            | 0,000613 | 0,000463 | 0,000407 | 0,000425 | 0,000492846 | 8,25298E-05 | 16,746 | 0,00058  | 0,000059 | 0,000059 | 0,0000597  | 0,0000542 | 0,0000573497 | 2,23745E-05 | 3,901  |
| Q61548 | AP180_MOUSE | Clathrin coat assembly protein AP180                                           | 0,000565 | 0,000605 | 0,000645 | 0,000642 | 0,000614429 | 3,77723E-05 | 6,148  | 0,000685 | 0,000603 | 0,000687 | 0,000623   | 0,000694  | 0,000658175  | 4,2247E-05  | 6,419  |
| P35486 | ODPA_MOUSE  | Pyruvate dehydrogenase E1 component subunit alpha, somatic form, mitochondrial | 0,001663 | 0,001606 | 0,001632 | 0,001653 | 0,001638571 | 2,50454E-05 | 1,528  | 0,001633 | 0,001492 | 0,001675 | 0,00163    | 0,001524  | 0,001590971  | 7,82869E-05 | 4,921  |
| Q61644 | PACN1_MOUSE | Protein kinase C and casein kinase substrate in neurons protein 1              | 0,000628 | 0,000679 | 0,00068  | 0,000647 | 0,000658437 | 2,56221E-05 | 3,891  | 0,000699 | 0,000668 | 0,000687 | 0,000645   | 0,000703  | 0,000680429  | 2,41012E-05 | 3,542  |
| Q92219 | SUCB1_MOUSE | Succinate--CoA ligase [ADP-forming] subunit beta, mitochondrial                | 0,001065 | 0,001104 | 0,001075 | 0,001158 | 0,001100465 | 4,21193E-05 | 3,827  | 0,00109  | 0,001013 | 0,001176 | 0,001203   | 0,001149  | 0,001126251  | 7,59936E-05 | 6,747  |
| P17427 | AP2A2_MOUSE | AP-2 complex subunit alpha-2                                                   | 0,000728 | 0,000734 | 0,000778 | 0,000777 | 0,000754211 | 2,69804E-05 | 3,577  | 0,000826 | 0,000789 | 0,000805 | 0,000846   | 0,000961  | 0,000845395  | 6,79359E-05 | 8,036  |
| Q61361 | PGCB_MOUSE  | Brevican core protein                                                          | 0,000508 | 0,000444 | 0,000577 | 0,000525 | 0,000513668 | 5,4988E-05  | 10,705 | 0,000498 | 0,00049  | 0,000476 | 0,000476   | 0,000507  | 0,0004896    | 1,34328E-05 | 2,744  |
| P05201 | AATC_MOUSE  | Aspartate aminotransferase, cytoplasmic                                        | 0,00474  | 0,00408  | 0,004691 | 0,004901 | 0,004603216 | 0,000359904 | 7,819  | 0,004218 | 0,003639 | 0,004049 | 0,004216   | 0,003873  | 0,003999189  | 0,000246533 | 6,165  |
| P62814 | VATB2_MOUSE | V-type proton ATPase subunit B, brain isoform                                  | 0,003169 | 0,003444 | 0,003686 | 0,003386 | 0,003421064 | 0,000212534 | 6,212  | 0,003472 | 0,003046 | 0,003517 | 0,003713   | 0,003608  | 0,003471186  | 0,000255001 | 7,346  |
| Q61838 | PZP_MOUSE   | Pregnancy zone protein                                                         | 0,000141 | 8,31E-05 | 8,66E-05 | 9,61E-05 | 0,000101572 | 2,65561E-05 | 26,145 | 8,1E-05  | 5,82E-05 | 6,26E-05 | 4,96E-05   | 6,29E-05  | 6,28495E-05  | 1,14798E-05 | 18,265 |
| Q9EQH3 | VPS35_MOUSE | Vacuolar protein sorting-associated protein 35                                 | 0,000782 | 0,000859 | 0,000856 | 0,000864 | 0,000840154 | 3,90491E-05 | 4,648  | 0,000811 | 0,00074  | 0,000819 | 0,000777   | 0,000892  | 0,000807624  | 5,67095E-05 | 7,022  |
| P09405 | NUCL_MOUSE  | Nucleolin                                                                      | 0,000599 | 0,00066  | 0,000673 | 0,000622 | 0,000638458 | 3,43774E-05 | 5,384  | 0,000659 | 0,000591 | 0,000623 | 0,000614   | 0,000713  | 0,00063967   | 4,75369E-05 | 7,431  |
| Q922D8 | C1TC_MOUSE  | C-1-tetrahydrofolate synthase, cytoplasmic                                     | 0,000109 | 0,000131 | 0,000111 | 0,000113 | 0,000116234 | 1,02404E-05 | 8,810  | 0,000127 | 0,00014  | 0,000126 | 0,000122   | 0,000139  | 0,000130743  | 8,25694E-06 | 6,315  |
| P80314 | TCPB_MOUSE  | T-complex protein 1 subunit beta                                               | 0,000562 | 0,000624 | 0,000593 | 0,000604 | 0,000595777 | 2,61172E-05 | 4,384  | 0,00059  | 0,000557 | 0,000622 | 0,000621   | 0,000595  | 0,000596971  | 2,66747E-05 | 4,468  |
| Q9QXV6 | EHD3_MOUSE  | EH domain-containing protein 3                                                 | 7,12E-05 | 0,000124 | 0,000116 | 0,000105 | 0,000103894 | 2,31968E-05 | 22,327 | 0,000123 | 9,77E-05 | 0,000113 | 0,000115   | 0,000117  | 0,000113058  | 9,27833E-06 | 8,207  |
| Q8CAA7 | PGM2L_MOUSE | Glucose 1,6-bisphosphate synthase                                              | 0,000385 | 0,000453 | 0,000435 | 0,000425 | 0,000424596 | 2,85593E-05 | 6,726  | 0,00045  | 0,000397 | 0,000427 | 0,000385   | 0,000393  | 0,000410453  | 2,74022E-05 | 6,676  |
| P11499 | HS90B_MOUSE | Heat shock protein HSP 90-beta                                                 | 0,001826 | 0,002116 | 0,001823 | 0,001893 | 0,001914489 | 0,000138076 | 7,212  | 0,002102 | 0,002127 | 0,002025 | 0,002016   | 0,002168  | 0,002087759  | 6,58606E-05 | 3,155  |
| P80316 | TCPE_MOUSE  | T-complex protein 1 subunit epsilon                                            | 0,000281 | 0,000307 | 0,00027  | 0,000282 | 0,000284987 | 1,53795E-05 | 5,397  | 0,000304 | 0,000274 | 0,000276 | 0,000291   | 0,000274  | 0,000283913  | 1,33561E-05 | 4,704  |
| Q9WU78 | PDC6I_MOUSE | Programmed cell death 6-interacting protein                                    | 0,000152 | 0,000168 | 0,000149 | 0,00016  | 0,000157504 | 8,64528E-06 | 5,489  | 0,000161 | 0,000145 | 0,000152 | 0,000149   | 0,000156  | 0,000152721  | 6,19762E-06 | 4,058  |
| O88569 | ROA2_MOUSE  | Heterogeneous nuclear ribonucleoproteins A2/B1                                 | 0,00093  | 0,000965 | 0,000969 | 0,001034 | 0,000974325 | 4,36048E-05 | 4,475  | 0,000989 | 0,000886 | 0,000954 | 0,000928   | 0,000939  | 0,000939245  | 3,78937E-05 | 4,034  |
| Q9EQ20 | MMSA_MOUSE  | Methylmalonate-semialdehyde dehydrogenase [acylating], mitochondrial           | 0,000322 | 0,000304 | 0,000256 | 0,000301 | 0,000295615 | 2,83852E-05 | 9,602  | 0,000274 | 0,000301 | 0,000321 | 0,000318   | 0,000287  | 0,000300106  | 2,0187E-05  | 6,727  |
| Q8K2B3 | SDHA_MOUSE  | Succinate dehydrogenase [ubiquinone] flavoprotein subunit, mitochondrial       | 0,001004 | 0,00098  | 0,000929 | 0,000981 | 0,000973446 | 3,16226E-05 | 3,249  | 0,000996 | 0,001049 | 0,001068 | 0,000994   | 0,000993  | 0,001019904  | 3,59487E-05 | 3,525  |
| Q9QYB8 | ADDB_MOUSE  | Beta-adducin                                                                   | 0,000442 | 0,000515 | 0,000475 | 0,000479 | 0,000477906 | 2,96425E-05 | 6,203  | 0,00052  | 0,000447 | 0,000467 | 0,000474   | 0,000511  | 0,000483886  | 3,04834E-05 | 6,300  |
| P62631 | EF1A2_MOUSE | Elongation factor 1-alpha 2                                                    | 0,000652 | 0,000784 | 0,000657 | 0,000746 | 0,000709947 | 6,55725E-05 | 9,236  | 0,000826 | 0,000832 | 0,00082  | 0,00082    | 0,000799  | 0,000819287  | 1,2225E-05  | 1,492  |
| Q22448 | CTNB1_MOUSE | Catenin beta-1                                                                 | 0,000363 | 0,000382 | 0,00037  | 0,00037  | 0,000371088 | 8,21837E-06 | 2,215  | 0,000405 | 0,000399 | 0,000365 | 0,000373   | 0,000387  | 0,000385604  | 1,68057E-05 | 4,358  |
| P20152 | VIME_MOUSE  | Vimentin                                                                       | 0,000331 | 0,000359 | 0,000371 | 0,000405 | 0,000391444 | 5,41269E-05 | 13,828 | 0,000385 | 0,000331 | 0,000478 | 0,000388   | 0,000365  | 0,000389617  | 5,43655E-05 | 13,954 |
| Q9R111 | GUAD_MOUSE  | Guanine deaminase                                                              | 0,000659 | 0,000649 | 0,000954 | 0,000717 | 0,000744905 | 0,000142422 | 19,120 | 0,000629 | 0,000562 | 0,000689 | 0,000736   | 0,000813  | 0,00068577   | 9,65713E-05 | 14,082 |
| P62259 | 1433E_MOUSE | 14-3-3 protein epsilon                                                         | 0,002881 | 0,002653 | 0,002613 | 0,002973 | 0,00277975  | 0,00017483  | 6,289  | 0,003022 | 0,003347 | 0,003117 | 0,003039   | 0,002509  | 0,003006792  | 0,000306746 | 10,202 |
| Q61553 | FSCN1_MOUSE | Fascin                                                                         | 0,000943 | 0,000863 | 0,000883 | 0,000869 | 0,00089828  | 3,66994E-05 | 4,124  | 0,000912 | 0,000869 | 0,000887 | 0,000934   | 0,000824  | 0,000885182  | 4,24377E-05 | 4,794  |
| P97807 | FUMH_MOUSE  | Fumarate hydratase, mitochondrial                                              | 0,001384 | 0,001316 | 0,001286 | 0,001332 | 0,001329411 | 4,13227E-05 | 3,108  | 0,001241 | 0,001251 | 0,001332 | 0,001271   | 0,001245  | 0,001267809  | 3,75914E-05 | 2,965  |
| Q92111 | TRFE_MOUSE  | Serotransferrin                                                                | 0,000212 | 0,000172 | 0,000151 | 0,00017  | 0,000176207 | 2,55029E-05 | 14,473 | 0,000149 | 0,000144 | 0,00014  | 0,000121   | 0,000141  | 0,000139205  | 1,09005E-05 | 7,831  |
| Q60932 | VDAC1_MOUSE | Voltage-dependent anion-selective channel protein 1                            | 0,003923 | 0,003759 | 0,003837 | 0,003917 | 0,003858858 | 7,73034E-05 | 2,003  | 0,00357  | 0,004006 | 0,003547 | 0,003213   | 0,003203  | 0,00350774   | 0,000329043 | 9,380  |
| Q920E0 | NCDN_MOUSE  | Neurochondrin                                                                  | 0,001912 | 0,002388 | 0,002374 | 0,002352 | 0,002256581 | 0,000230192 | 10,201 | 0,002149 | 0,00192  | 0,002152 | 0,00201    | 0,002393  | 0,000125004  | 0,000190983 | 8,427  |
| Q8VEK3 | HNRPU_MOUSE | Heterogeneous nuclear ribonucleoprotein U                                      | 0,000225 | 0,000283 | 0,000248 | 0,000252 | 0,000251996 | 2,37626E-05 | 9,430  | 0,000309 | 0,000317 | 0,000322 | 0,000323   | 0,000407  | 0,00033559   | 4,018E-05   | 11,973 |
| Q9D0F9 | PGM1_MOUSE  | Phosphoglucosmutase-1                                                          | 0,000869 | 0,00103  | 0,001254 | 0,001261 | 0,001103318 | 0,000189401 | 17,166 | 0,000836 | 0,000843 | 0,001043 | 0,000986   | 0,000962  | 0,000933975  | 9,12096E-05 | 9,766  |
| P60053 | LIS1_MOUSE  | Platelet-activating factor acetylhydrolase IB subunit alpha                    | 0,000328 | 0,00031  | 0,000319 | 0,000299 | 0,000314192 | 1,2538E-05  | 3,991  | 0,000328 | 0,000289 | 0,000301 | 0,000305   | 0,000302  | 0,000305107  | 1,44377E-05 | 4,732  |
| Q9R0P9 | UCHL1_MOUSE | Ubiquitin carboxyl-terminal hydrolase isozyme L1                               | 0,000663 | 0,000656 | 0,000757 | 0,000812 | 0,000722232 | 7,58914E-05 | 10,508 | 0,000656 | 0,000523 | 0,000695 | 0,000578   | 0,000585  | 0,000589372  | 6,3904E-05  | 10,843 |
| P11983 | TCPA_MOUSE  | T-complex protein 1 subunit alpha                                              | 0,000612 | 0,000698 | 0,000633 | 0,000702 | 0,000671622 | 4,57423E-05 | 6,919  | 0,000683 | 0,000652 | 0,000711 | 0,000765   | 0,000684  | 0,000699098  | 4,24305E-05 | 6,069  |
| Q92155 | SEPT3_MOUSE | Neuronal-specific septin-3                                                     | 0,001022 | 0,000979 | 0,000963 | 0,000974 | 0,000984188 | 2,58724E-05 | 2,629  | 0,001106 | 0,000975 | 0,000949 | 0,000998   | 0,000855  | 0,000976631  | 9,04951E-05 | 9,266  |
| P55012 | S12A2_MOUSE | Solute carrier family 12 member 2                                              | 5,41E-05 | 5,12E-05 | 3,97E-05 | 5,28E-05 | 4,94667E-05 | 6,61919E-06 | 13,381 | 4,41E-05 | 4,54E-05 | 5,78E-05 | 4,16E-05   | 4,34E-05  | 4,64782E-05  | 6,49753E-06 | 13,980 |
| Q62188 | DPYL3_MOUSE | Dihydropyrimidinase-related protein 3                                          | 0,000814 | 0,000963 | 0,000852 | 0,000987 | 0,000940144 | 8,41629E-05 | 9,309  | 0,001088 | 0,001038 | 0,001114 | 0,001175   | 0,001055  | 0,001093808  | 5,39923E-05 | 4,936  |
| Q92206 | SEPT5_MOUSE | Septin-5                                                                       | 0,000699 | 0,000596 | 0,000664 | 0,000625 | 0,000645799 | 4,49708E-05 | 6,964  | 0,000695 | 0,000593 | 0,00062  | 0,000604   | 0,000602  | 0,000622635  | 4,15893E-05 | 6,680  |
| Q80U28 | MADD_MOUSE  | MAP kinase-activating death domain protein                                     | 0,000134 | 0,00015  | 0,00014  | 0,000155 | 0,000145048 | 9,6529E-06  | 6,655  | 0,000158 | 0,000116 | 9,93E-05 | 0,000135   | 0,000144  | 0,000130522  | 2,33455E-05 | 17,886 |
| Q8BM51 | ECHA_MOUSE  | Trifunctional enzyme subunit alpha, mitochondrial                              | 0,000649 | 0,00068  | 0,000652 | 0,000633 | 0,000633005 | 5,59609E-05 | 8,841  | 0,000635 | 0,000762 | 0,000705 | 0,000646   | 0,000647  | 0,000678883  | 5,41787E-05 | 7,981  |
| Q9C230 | OLA1_MOUSE  | Olg-like ATPase 1                                                              | 0,000257 | 0,000309 | 0,000273 | 0,000315 | 0,000288523 | 2,77785E-05 | 9,628  | 0,000282 | 0,000227 | 0,000262 | 0,000299   | 0,00028   | 0,000269749  | 2,74134E-05 | 10,163 |
| Q8X596 | NAC2_MOUSE  | Sodium/calcium exchanger 2                                                     | 0,000337 | 0,000308 | 0,000339 | 0,000349 | 0,000333142 | 1,77225E-05 | 5,320  | 0,000377 | 0,000309 | 0,000315 | 0,000315   | 0,000363  | 0,000335567  | 3,16852E-05 | 9,442  |
| O88844 | IDHC_MOUSE  | Isoctrate dehydrogenase [NADP] cytoplasmic                                     | 0,000147 | 0,00015  | 0,000169 | 0,000176 | 0,00016068  | 1,39402E-05 | 8,676  | 0,00014  | 0,00012  | 0,000157 | 0,000146   | 0,000152  | 0,000143157  | 1,43299E-05 | 10,010 |
| P35235 | PTN11_MOUSE | Tyrosine-protein phosphatase non-receptor type 11                              | 0,000123 | 0,00014  | 0,000113 | 0,000124 | 0,000125045 | 1,08364E-05 | 8,666  | 0,000132 | 0,000131 | 0,000128 | 0,000135   | 0,000127  | 0,000130512  | 3,30123E-06 | 2,529  |
| O85539 | BIN1_MOUSE  | Myc box-dependent-interacting protein 1                                        | 0,000931 | 0,00094  | 0,000827 | 0,00088  | 0,000894359 | 5,24011E-05 | 5,859  | 0,000969 | 0,000839 | 0,00097  | 0,001027</ |           |              |             |        |

|        |             |                                                                             |          |          |          |          |              |             |        |          |          |           |           |           |              |             |        |
|--------|-------------|-----------------------------------------------------------------------------|----------|----------|----------|----------|--------------|-------------|--------|----------|----------|-----------|-----------|-----------|--------------|-------------|--------|
| O08749 | DLDH_MOUSE  | Dihydrolipoyl dehydrogenase, mitochondrial                                  | 0,002279 | 0,002369 | 0,002176 | 0,002187 | 0,002252688  | 9,01662E-05 | 4,003  | 0,002315 | 0,00221  | 0,002193  | 0,002282  | 0,002232  | 0,002246577  | 5,08048E-05 | 2,261  |
| P09103 | PDI1_MOUSE  | Protein disulfide-isomerase                                                 | 0,000323 | 0,000355 | 0,000322 | 0,000336 | 0,000334114  | 1,54885E-05 | 4,636  | 0,000365 | 0,000229 | 0,000368  | 0,000308  | 0,000362  | 0,000326277  | 6,00366E-05 | 18,400 |
| Q00612 | G6PD1_MOUSE | Glucose-6-phosphate 1-dehydrogenase X                                       | 0,000298 | 0,00031  | 0,000269 | 0,000286 | 0,000290576  | 1,76072E-05 | 6,059  | 0,000278 | 0,000271 | 0,000282  | 0,000307  | 0,000247  | 0,000277149  | 2,1443E-05  | 7,737  |
| Q9JMA1 | UBP14_MOUSE | Ubiquitin carboxyl-terminal hydrolase 14                                    | 5,34E-05 | 7,13E-05 | 5,61E-05 | 6,23E-05 | 6,07725E-05  | 7,93843E-06 | 13,063 | 5,77E-05 | 6,28E-05 | 7,23E-05  | 8,19E-05  | 6,91E-05  | 6,87544E-05  | 9,25234E-06 | 13,457 |
| P10637 | TAU_MOUSE   | Microtubule-associated protein tau                                          | 0,000662 | 0,000681 | 0,000628 | 0,00067  | 0,000660138  | 2,27365E-05 | 3,444  | 0,000685 | 0,000645 | 0,000617  | 0,000658  | 0,000647  | 0,000632545  | 4,33625E-05 | 6,855  |
| Q9D6R2 | IDH3A_MOUSE | Isocitrate dehydrogenase [NAD] subunit alpha, mitochondrial                 | 0,001158 | 0,001181 | 0,001193 | 0,001233 | 0,001191183  | 3,15962E-05 | 2,653  | 0,001192 | 0,001167 | 0,001227  | 0,001193  | 0,001142  | 0,001184155  | 3,16718E-05 | 2,675  |
| Q8QZ71 | THIL_MOUSE  | Acetyl-CoA acetyltransferase, mitochondrial                                 | 0,001027 | 0,001102 | 0,001064 | 0,001101 | 0,001073389  | 3,56462E-05 | 3,321  | 0,001113 | 0,001073 | 0,001091  | 0,001088  | 0,001154  | 0,00107364   | 3,38057E-05 | 6,053  |
| Q9CVB6 | ARPC2_MOUSE | Actin-related protein 2/3 complex subunit 2                                 | 0,000336 | 0,000408 | 0,000462 | 0,000555 | 0,000458221  | 9,11072E-05 | 19,883 | 0,000463 | 0,000438 | 0,00052   | 0,000487  | 0,000454  | 0,0004723    | 3,17346E-05 | 6,719  |
| P08249 | MDHM_MOUSE  | Malate dehydrogenase, mitochondrial                                         | 0,004674 | 0,004543 | 0,004636 | 0,005084 | 0,004734108  | 0,000239552 | 5,060  | 0,004348 | 0,005122 | 0,004351  | 0,004267  | 0,004392  | 0,004496     | 0,000352722 | 7,845  |
| Q62420 | SH3G2_MOUSE | Endophilin-A1                                                               | 0,00044  | 0,000383 | 0,000376 | 0,000404 | 0,00040055   | 2,87036E-05 | 7,166  | 0,000479 | 0,000429 | 0,000469  | 0,000456  | 0,000443  | 0,000455327  | 2,01277E-05 | 4,421  |
| Q8C1B7 | SEPT1_MOUSE | Septin-11                                                                   | 0,000421 | 0,000358 | 0,000389 | 0,000331 | 0,000374567  | 3,91041E-05 | 10,440 | 0,000401 | 0,000385 | 0,000375  | 0,000369  | 0,000383  | 0,000382479  | 1,18471E-05 | 3,097  |
| P30275 | KCRU_MOUSE  | Creatine kinase U-type, mitochondrial                                       | 0,002002 | 0,00195  | 0,00185  | 0,002009 | 0,001952845  | 7,32888E-05 | 3,753  | 0,002103 | 0,001811 | 0,002072  | 0,002116  | 0,001928  | 0,002005912  | 0,000132083 | 6,585  |
| P47708 | RP3A_MOUSE  | Rabphilin-3A                                                                | 0,000121 | 0,000111 | 0,0001   | 0,000103 | 0,000108988  | 9,29552E-06 | 8,536  | 0,000138 | 0,000124 | 0,000111  | 0,000101  | 0,000105  | 0,000115708  | 1,53529E-05 | 13,269 |
| O88643 | PAK1_MOUSE  | Serine/threonine-protein kinase PAK 1                                       | 0,000263 | 0,000291 | 0,000274 | 0,000264 | 0,000273057  | 1,29669E-05 | 4,749  | 0,000305 | 0,000281 | 0,000257  | 0,000258  | 0,000245  | 0,00026924   | 2,3854E-05  | 8,860  |
| Q3UHL1 | CAMKV_MOUSE | CaM kinase-like vesicle-associated protein                                  | 0,000444 | 0,000527 | 0,000602 | 0,000627 | 0,000550091  | 8,21634E-05 | 14,936 | 0,000521 | 0,000431 | 0,000517  | 0,000517  | 0,0007    | 0,000528001  | 0,000102962 | 19,500 |
| P53810 | PIPNA_MOUSE | Phosphatidylinositol transfer protein alpha isoform                         | 0,000182 | 0,000199 | 0,000183 | 0,000232 | 0,000198937  | 2,33819E-05 | 11,753 | 0,000212 | 0,000174 | 0,000199  | 0,000194  | 0,000163  | 0,000188465  | 1,9528E-05  | 10,362 |
| Q9D819 | IPYR_MOUSE  | Inorganic pyrophosphatase                                                   | 0,000285 | 0,000283 | 0,000303 | 0,000323 | 0,000298333  | 1,88519E-05 | 6,319  | 0,0003   | 0,000275 | 0,00029   | 0,000268  | 0,00025   | 0,000276613  | 1,96643E-05 | 7,109  |
| P18872 | GNAO_MOUSE  | Inorganic nucleotide-binding protein G(o) subunit alpha                     | 0,001146 | 0,001146 | 0,001301 | 0,001276 | 0,001217335  | 8,27096E-05 | 6,794  | 0,001246 | 0,001248 | 0,001305  | 0,001278  | 0,001228  | 0,001261017  | 3,01574E-05 | 2,392  |
| B9EKR1 | PRPTZ_MOUSE | Receptor-type tyrosine-protein phosphatase zeta                             | 0,000595 | 0,00067  | 0,000656 | 0,000675 | 0,000648981  | 3,17577E-05 | 5,726  | 0,000674 | 0,000652 | 0,000638  | 0,000674  | 0,00061   | 0,000629345  | 3,89263E-05 | 6,185  |
| Q9R0G6 | ARCA1_MOUSE | Actin-related protein 2/3 complex subunit 1A                                | 9,83E-05 | 9,39E-05 | 9,9E-05  | 0,000103 | 9,84311E-05  | 5,69913E-06 | 3,626  | 9,2E-05  | 7,61E-05 | 7,99E-05  | 8,09E-05  | 7,43E-05  | 8,06444E-05  | 6,91996E-06 | 8,581  |
| Q77QF7 | AMPH_MOUSE  | Amphiphysin                                                                 | 0,001276 | 0,001361 | 0,001495 | 0,00136  | 0,00137322   | 9,05606E-05 | 6,595  | 0,001432 | 0,001216 | 0,001232  | 0,001159  | 0,001414  | 0,001290458  | 0,000124057 | 9,613  |
| P80313 | TCFH_MOUSE  | T-complex protein 1 subunit eta                                             | 0,000335 | 0,000403 | 0,00035  | 0,000365 | 0,000363737  | 2,93006E-05 | 8,055  | 0,000359 | 0,000315 | 0,000395  | 0,000375  | 0,000342  | 0,000357106  | 3,03262E-05 | 8,492  |
| Q8VDM4 | PSMD2_MOUSE | 26S proteasome non-ATPase regulatory subunit 2                              | 0,000167 | 0,000195 | 0,000201 | 0,000196 | 0,000189569  | 1,54878E-05 | 8,170  | 0,000204 | 0,000197 | 0,000211  | 0,000213  | 0,000222  | 0,000209244  | 9,18213E-06 | 4,388  |
| Q9DB11 | PGAM1_MOUSE | Phosphoglycerate mutase 1                                                   | 0,000187 | 0,000165 | 0,000232 | 0,000289 | 0,0002043152 | 0,000327823 | 16,045 | 0,000164 | 0,000181 | 0,0001851 | 0,0001905 | 0,001753  | 0,001792852  | 9,60764E-05 | 5,359  |
| P17183 | ENOG_MOUSE  | Gamma-enolase                                                               | 0,002905 | 0,00302  | 0,004168 | 0,003937 | 0,003507323  | 0,000638159 | 18,195 | 0,002764 | 0,002336 | 0,002826  | 0,003272  | 0,002999  | 0,002839484  | 0,000343299 | 12,090 |
| P63101 | 1433Z_MOUSE | 14-3-3 protein zeta/delta                                                   | 0,002391 | 0,002126 | 0,002163 | 0,002222 | 0,002225522  | 0,00011738  | 5,274  | 0,002384 | 0,002524 | 0,002254  | 0,0002251 | 0,0002259 | 0,002334403  | 0,00012003  | 5,142  |
| P28663 | SNAB_MOUSE  | Beta-soluble NSF attachment protein                                         | 0,000857 | 0,000899 | 0,001051 | 0,001039 | 0,000961375  | 9,79232E-05 | 10,186 | 0,000806 | 0,000827 | 0,000952  | 0,000908  | 0,000848  | 0,000868013  | 6,0385E-05  | 6,957  |
| P32921 | SYWC_MOUSE  | Tryptophan-tRNA ligase, cytoplasmic                                         | 0,000164 | 0,00019  | 0,000165 | 0,000161 | 0,000170035  | 1,35006E-05 | 7,940  | 0,000174 | 0,000183 | 0,000178  | 0,000167  | 0,000181  | 0,000176789  | 6,31025E-06 | 3,569  |
| Q9DC69 | NDUA9_MOUSE | NADH dehydrogenase [ubiquinone] 1 alpha subcomplex subunit 9, mitochondrial | 0,001007 | 0,000925 | 0,000924 | 0,001043 | 0,000974551  | 5,97289E-05 | 6,129  | 0,000805 | 0,000842 | 0,000824  | 0,000711  | 0,000589  | 0,000754062  | 0,000105222 | 13,954 |
| Q62059 | CSPG2_MOUSE | Versican core protein                                                       | 0,0002   | 0,00022  | 0,000195 | 0,000198 | 0,000203312  | 1,11918E-05 | 5,505  | 0,000176 | 0,000138 | 0,000172  | 0,000191  | 0,000227  | 0,000181     | 3,21813E-05 | 17,780 |
| O89053 | COR1A_MOUSE | Coronin-1A                                                                  | 0,000246 | 0,000256 | 0,000279 | 0,000254 | 0,000258992  | 1,39681E-05 | 5,393  | 0,000264 | 0,00023  | 0,000235  | 0,000242  | 0,000255  | 0,000245023  | 1,43176E-05 | 5,843  |
| Q9D154 | ILEUA_MOUSE | Leukocyte elastase inhibitor A                                              | 0,000195 | 0,000178 | 0,000144 | 0,000158 | 0,000168757  | 2,26866E-05 | 13,443 | 0,000205 | 0,000184 | 0,000176  | 0,000175  | 0,00015   | 0,000177982  | 1,97593E-05 | 11,102 |
| O54774 | AP3D1_MOUSE | AP-3 complex subunit delta-1                                                | 7,24E-05 | 9,98E-05 | 0,000105 | 0,000112 | 9,7311E-05   | 1,74218E-05 | 17,903 | 0,000133 | 0,000117 | 0,000121  | 0,000136  | 0,000142  | 0,000129958  | 1,02536E-05 | 7,890  |
| Q9Y0G0 | NDRG2_MOUSE | Protein NDRG2                                                               | 0,001306 | 0,001393 | 0,001179 | 0,001258 | 0,001283917  | 8,94431E-05 | 6,966  | 0,001277 | 0,001159 | 0,001209  | 0,001218  | 0,001115  | 0,001281899  | 0,00018191  | 14,191 |
| Q9DB77 | OCR2_MOUSE  | Cytochrome b-c1 complex subunit 2, mitochondrial                            | 0,001797 | 0,001599 | 0,001654 | 0,001578 | 0,001657193  | 9,87622E-05 | 5,960  | 0,001382 | 0,001487 | 0,001465  | 0,001407  | 0,001433  | 0,001434742  | 4,25581E-05 | 2,966  |
| P29341 | PABP1_MOUSE | Polyadenylate-binding protein 1                                             | 0,000246 | 0,000297 | 0,000279 | 0,000276 | 0,000274827  | 2,10808E-05 | 7,671  | 0,000292 | 0,000303 | 0,000289  | 0,000292  | 0,000291  | 0,000293186  | 5,54879E-06 | 1,893  |
| Q922B2 | SYDC_MOUSE  | Aspartate-tRNA ligase, cytoplasmic                                          | 0,000262 | 0,000284 | 0,000273 | 0,000277 | 0,000274005  | 8,99924E-06 | 3,284  | 0,000266 | 0,000252 | 0,000268  | 0,000272  | 0,000255  | 0,000262645  | 8,44993E-06 | 3,217  |
| Q9CQQ7 | AT5F1_MOUSE | ATP synthase F(0) complex subunit B1, mitochondrial                         | 0,001238 | 0,001267 | 0,001174 | 0,001301 | 0,001245171  | 5,37628E-05 | 4,318  | 0,001097 | 0,001202 | 0,001251  | 0,001202  | 0,001101  | 0,001170668  | 8,61602E-05 | 5,822  |
| Q9V112 | BACH_MOUSE  | Cytosolic acyl coenzyme A thioester hydrolase                               | 0,002243 | 0,002303 | 0,00216  | 0,002256 | 0,002240335  | 5,95514E-05 | 2,658  | 0,00232  | 0,001999 | 0,002074  | 0,002094  | 0,001987  | 0,002094632  | 0,000134364 | 6,415  |
| Q99JY9 | ARP3_MOUSE  | Actin-related protein 3                                                     | 0,000418 | 0,000502 | 0,000489 | 0,000536 | 0,000486245  | 4,97705E-05 | 10,236 | 0,000468 | 0,000441 | 0,000505  | 0,000528  | 0,000532  | 0,000494741  | 3,95717E-05 | 7,998  |
| Q9CZC8 | SCRN1_MOUSE | Scercin-1                                                                   | 0,000596 | 0,000516 | 0,00065  | 0,000611 | 0,000592946  | 5,61484E-05 | 9,469  | 0,000522 | 0,000503 | 0,000552  | 0,000533  | 0,000522  | 0,000526277  | 1,79224E-05 | 3,406  |
| Q91W05 | NDUS2_MOUSE | NADH dehydrogenase [ubiquinone] iron-sulfur protein 2, mitochondrial        | 0,000682 | 0,000655 | 0,000652 | 0,000632 | 0,000655155  | 2,0697E-05  | 3,159  | 0,00061  | 0,000557 | 0,000652  | 0,000635  | 0,000661  | 0,00062325   | 4,18679E-05 | 6,718  |
| P16125 | LDHB_MOUSE  | L-lactate dehydrogenase B chain                                             | 0,003539 | 0,00318  | 0,003145 | 0,003386 | 0,003312644  | 0,000184648 | 5,574  | 0,003513 | 0,003324 | 0,003339  | 0,003194  | 0,002912  | 0,003256138  | 0,000223495 | 6,864  |
| P10852 | 4F2_MOUSE   | 4F2 cell-surface antigen heavy chain                                        | 0,000893 | 0,000972 | 0,000838 | 0,000938 | 0,000910252  | 5,79351E-05 | 6,365  | 0,000987 | 0,000772 | 0,000924  | 0,000926  | 0,000912  | 0,0009104342 | 7,94696E-05 | 8,788  |
| Q9CPV4 | GLOD4_MOUSE | Glyoxalase domain-containing protein 4                                      | 0,000394 | 0,000394 | 0,000405 | 0,000438 | 0,0004047591 | 2,08825E-05 | 5,123  | 0,000415 | 0,000387 | 0,000437  | 0,00041   | 0,000387  | 0,000407412  | 2,11856E-05 | 5,204  |
| P04370 | MBP_MOUSE   | Myelin basic protein                                                        | 0,006619 | 0,007166 | 0,0054   | 0,006884 | 0,006517329  | 0,00077684  | 11,933 | 0,007239 | 0,007118 | 0,007329  | 0,007394  | 0,006135  | 0,007043124  | 0,000518196 | 7,357  |
| P17751 | TPIS_MOUSE  | Triosephosphate isomerase                                                   | 0,002148 | 0,002072 | 0,002086 | 0,002028 | 0,002433428  | 0,00037929  | 15,587 | 0,001772 | 0,002128 | 0,002117  | 0,002019  | 0,001956  | 0,001998303  | 0,000145347 | 7,273  |
| Q9Z268 | RASL1_MOUSE | RasGAP-activating-like protein 1                                            | 0,000126 | 0,000126 | 0,000158 | 0,000144 | 0,000138459  | 1,53138E-05 | 11,060 | 0,000154 | 0,000128 | 0,000128  | 0,000138  | 0,000156  | 0,000140961  | 1,3351E-05  | 9,471  |
| P14152 | MDHC_MOUSE  | Malate dehydrogenase, cytoplasmic                                           | 0,007952 | 0,007589 | 0,007537 | 0,008022 | 0,007774866  | 0,000247387 | 3,182  | 0,008124 | 0,007785 | 0,007974  | 0,007741  | 0,006902  | 0,007704942  | 0,000474473 | 6,158  |
| Q88VE3 | VATH_MOUSE  | V-type proton ATPase subunit H                                              | 0,000556 | 0,0006   | 0,000613 | 0,000593 | 0,000590645  | 2,48191E-05 | 4,202  | 0,000555 | 0,000548 | 0,00058   | 0,000578  | 0,000601  | 0,000572242  | 2,11646E-05 | 3,699  |
| P63328 | PP2BA_MOUSE | Serine/threonine-protein phosphatase 2B catalytic subunit alpha isoform     | 0,001146 | 0,001143 | 0,001124 | 0,001152 | 0,001141402  | 1,20686E-05 | 1,057  | 0,001208 | 0,000995 | 0,001116  | 0,001292  | 0,001346  | 0,001200353  | 0,000135521 | 11,290 |
| P12382 | PFKAL_MOUSE | ATP-dependent 6-phosphofructokinase, liver type                             | 0,000539 | 0,000562 | 0,000543 | 0,000552 | 0,000549137  | 1,00229E-05 | 1,825  | 0,00058  |          |           |           |           |              |             |        |

|        |             |                                                                                   |          |          |          |          |             |             |        |          |          |          |          |             |             |             |        |
|--------|-------------|-----------------------------------------------------------------------------------|----------|----------|----------|----------|-------------|-------------|--------|----------|----------|----------|----------|-------------|-------------|-------------|--------|
| P80317 | TCPZ_MOUSE  | T-complex protein 1 subunit zeta                                                  | 0,000284 | 0,00033  | 0,000289 | 0,000327 | 0,000307403 | 2,44745E-05 | 7,962  | 0,000303 | 0,000297 | 0,00032  | 0,000297 | 0,0003      | 0,000303349 | 9,62813E-06 | 3,174  |
| Q921M7 | FA49B_MOUSE | Protein FAM49B                                                                    | 0,000779 | 0,000693 | 0,000704 | 0,000695 | 0,000717623 | 4,125E-05   | 5,748  | 0,000769 | 0,00076  | 0,000701 | 0,00065  | 0,00062     | 0,000700132 | 6,59823E-05 | 9,424  |
| Q8CGP1 | H2B1K_MOUSE | Histone H2B type 1-K                                                              | 0,00016  | 0,000213 | 0,000188 | 0,000215 | 0,000194038 | 2,5997E-05  | 13,398 | 0,000173 | 0,0002   | 0,000241 | 0,000185 | 0,000197    | 0,000199318 | 2,57176E-05 | 12,903 |
| Q80TL4 | PHF24_MOUSE | PHD finger protein 24                                                             | 0,00031  | 0,000284 | 0,000363 | 0,00029  | 0,000311729 | 3,58961E-05 | 11,515 | 0,000273 | 0,000238 | 0,000289 | 0,000278 | 0,000307    | 0,000276856 | 2,5401E-05  | 9,175  |
| Q99JY0 | ECHB_MOUSE  | Trifunctional enzyme subunit beta, mitochondrial                                  | 0,00056  | 0,000558 | 0,000532 | 0,000561 | 0,000552735 | 1,38745E-05 | 2,510  | 0,000473 | 0,00057  | 0,000559 | 0,00049  | 0,000475    | 0,000513512 | 4,74415E-05 | 9,239  |
| Q3UM45 | PP1R7_MOUSE | Protein phosphatase 1 regulatory subunit 7                                        | 0,00018  | 0,000177 | 0,000188 | 0,000179 | 0,00018092  | 4,78799E-06 | 2,646  | 0,000189 | 0,00017  | 0,000205 | 0,000213 | 0,000212    | 0,000197652 | 1,82709E-05 | 9,244  |
| Q99LX0 | PARK7_MOUSE | Protein Di-1                                                                      | 0,000564 | 0,000592 | 0,000559 | 0,000663 | 0,000594465 | 4,78503E-05 | 8,049  | 0,000622 | 0,000621 | 0,000727 | 0,000688 | 0,000614    | 0,000654632 | 5,06131E-05 | 7,732  |
| Q922I0 | LETM1_MOUSE | LETM1 and EF-hand domain-containing protein 1, mitochondrial                      | 0,000119 | 0,000126 | 0,000128 | 0,000113 | 0,000125675 | 6,72059E-06 | 5,528  | 0,000114 | 0,000113 | 0,000111 | 0,000109 | 0,000114    | 0,000112331 | 1,95896E-06 | 1,744  |
| Q6P1F6 | 2ABA_MOUSE  | Serine/threonine-protein phosphatase 2A 55 kDa regulatory subunit B alpha isoform | 0,00025  | 0,000258 | 0,000276 | 0,000249 | 0,000258024 | 1,24901E-05 | 4,841  | 0,000272 | 0,000259 | 0,000294 | 0,000304 | 0,000304    | 0,000286451 | 2,01315E-05 | 7,028  |
| Q8K0T0 | RTN1_MOUSE  | Reticulon-1                                                                       | 0,000779 | 0,000882 | 0,000857 | 0,000776 | 0,000823648 | 5,42264E-05 | 6,584  | 0,000834 | 0,000835 | 0,000858 | 0,000831 | 0,0008      | 0,00083195  | 2,06913E-05 | 2,487  |
| P67778 | PHB_MOUSE   | Prohibitin                                                                        | 0,000908 | 0,000843 | 0,000841 | 0,000828 | 0,000854977 | 3,61719E-05 | 4,231  | 0,000775 | 0,000817 | 0,000798 | 0,000721 | 0,000706    | 0,000763288 | 4,81472E-05 | 6,308  |
| Q9DCN2 | NB5R3_MOUSE | NADH-cytochrome b5 reductase 3                                                    | 0,000108 | 0,000116 | 0,000131 | 0,000125 | 0,000120051 | 1,02839E-05 | 8,566  | 9,62E-05 | 0,000109 | 0,000107 | 8,55E-05 | 7,87E-05    | 9,51883E-05 | 1,31015E-05 | 13,764 |
| P48774 | GSTM5_MOUSE | Glutathione S-transferase Mu 5                                                    | 0,000413 | 0,000412 | 0,000446 | 0,000492 | 0,00044063  | 3,76121E-05 | 8,536  | 0,000479 | 0,000454 | 0,000604 | 0,000561 | 0,000475    | 0,000514739 | 6,43907E-05 | 12,509 |
| P26638 | SYSC_MOUSE  | Serine-tRNA ligase, cytoplasmic                                                   | 0,000461 | 0,000487 | 0,000466 | 0,000449 | 0,000465527 | 1,58416E-05 | 3,403  | 0,000496 | 0,000386 | 0,000464 | 0,000442 | 0,000441    | 0,000445698 | 4,0116E-05  | 9,001  |
| Q08709 | PRDX6_MOUSE | Peroxiredoxin-6                                                                   | 0,000775 | 0,000873 | 0,00088  | 0,000977 | 0,000875845 | 8,25044E-05 | 9,420  | 0,000943 | 0,001005 | 0,000991 | 0,000925 | 0,000901    | 0,000952875 | 4,39422E-05 | 4,612  |
| P50518 | VATE1_MOUSE | V-type proton ATPase subunit E 1                                                  | 0,00052  | 0,000534 | 0,000544 | 0,000563 | 0,000540357 | 1,81474E-05 | 3,358  | 0,000649 | 0,00063  | 0,000671 | 0,000684 | 0,000656    | 0,000657882 | 2,07784E-05 | 3,158  |
| P62908 | RS3_MOUSE   | 40S ribosomal protein S3                                                          | 0,00021  | 0,000214 | 0,000224 | 0,000231 | 0,000219727 | 9,55984E-06 | 4,351  | 0,000225 | 0,000231 | 0,000173 | 0,000228 | 0,000228    | 0,000217    | 2,45798E-05 | 11,327 |
| Q9D051 | ODPB_MOUSE  | Pyruvate dehydrogenase E1 component subunit beta, mitochondrial                   | 0,001828 | 0,001774 | 0,001723 | 0,001807 | 0,001782854 | 4,57917E-05 | 2,568  | 0,001837 | 0,001778 | 0,001867 | 0,001884 | 0,001727    | 0,001818732 | 6,54836E-05 | 3,601  |
| P51150 | RAB7A_MOUSE | Ras-related protein Rab-7a                                                        | 0,000716 | 0,000735 | 0,000742 | 0,000741 | 0,000733376 | 1,2083E-05  | 1,648  | 0,000727 | 0,000741 | 0,000754 | 0,000744 | 0,000656    | 0,000724299 | 3,93382E-05 | 5,431  |
| P47757 | CAP2B_MOUSE | F-actin-capping protein subunit beta                                              | 0,00047  | 0,000514 | 0,00053  | 0,000598 | 0,00052808  | 5,33658E-05 | 10,106 | 0,000525 | 0,000553 | 0,000588 | 0,000586 | 0,000569    | 0,000564107 | 2,6129E-05  | 4,632  |
| P68040 | RACK1_MOUSE | Receptor of activated protein C kinase 1                                          | 0,000305 | 0,000317 | 0,000322 | 0,00033  | 0,000318554 | 1,05704E-05 | 3,318  | 0,00031  | 0,000308 | 0,0003   | 0,000258 | 0,000233    | 0,000281964 | 3,43331E-05 | 12,176 |
| Q62167 | DDX3X_MOUSE | ATP-dependent RNA helicase DDX3X                                                  | 4,46E-05 | 5,13E-05 | 5,24E-05 | 5,72E-05 | 5,13769E-05 | 5,15724E-06 | 10,038 | 4,58E-05 | 4,71E-05 | 5,18E-05 | 4,58E-05 | 5,14E-05    | 4,89214E-05 | 2,64122E-06 | 5,399  |
| Q99LC3 | NDUAA_MOUSE | NADH dehydrogenase [ubiquinone] 1 alpha subcomplex subunit 10, mitochondrial      | 0,000823 | 0,000788 | 0,000789 | 0,000767 | 0,000792018 | 2,29823E-05 | 2,902  | 0,000696 | 0,000617 | 0,000679 | 0,000655 | 0,000543    | 0,000638017 | 6,09464E-05 | 9,552  |
| P35700 | PRDX1_MOUSE | Peroxiredoxin-1                                                                   | 0,001003 | 0,001    | 0,000975 | 0,001023 | 0,001000416 | 1,97911E-05 | 1,978  | 0,001003 | 0,001104 | 0,001138 | 0,001059 | 0,000882    | 0,001037284 | 0,00010066  | 9,704  |
| Q80T88 | VAT1L_MOUSE | Synaptic vesicle membrane protein VAT-1 homolog-like                              | 0,000698 | 0,000698 | 0,000656 | 0,000661 | 0,000654195 | 6,5452E-05  | 10,005 | 0,000583 | 0,000519 | 0,000688 | 0,000635 | 0,000614    | 0,000647984 | 0,000121129 | 18,693 |
| P42669 | PURA_MOUSE  | Transcriptional activator protein Pur-alpha                                       | 0,000627 | 0,000738 | 0,000618 | 0,000696 | 0,00066985  | 5,69499E-05 | 8,502  | 0,000675 | 0,000657 | 0,000658 | 0,000667 | 0,000623    | 0,000655973 | 2,00729E-05 | 3,060  |
| P61979 | HNRPK_MOUSE | Heterogeneous nuclear ribonucleoprotein K                                         | 0,001219 | 0,001463 | 0,001464 | 0,001454 | 0,001400231 | 6,000120958 | 8,638  | 0,001356 | 0,001194 | 0,001441 | 0,001356 | 0,001402    | 0,001349759 | 9,38823E-05 | 6,955  |
| Q35129 | PHB2_MOUSE  | Prohibitin-2                                                                      | 0,001308 | 0,001222 | 0,00124  | 0,00128  | 0,001262226 | 3,87321E-05 | 3,069  | 0,001182 | 0,001162 | 0,00121  | 0,001144 | 0,001079    | 0,00115539  | 4,9357E-05  | 4,272  |
| P62761 | VISL1_MOUSE | Visinin-like protein 1                                                            | 0,000914 | 0,00095  | 0,000955 | 0,000968 | 0,000946983 | 2,29812E-05 | 2,427  | 0,000863 | 0,000941 | 0,001034 | 0,000996 | 0,000806    | 0,00092806  | 9,35445E-05 | 10,080 |
| P14094 | AT1B1_MOUSE | Sodium/potassium-transporting ATPase subunit beta-1                               | 0,004273 | 0,004216 | 0,004205 | 0,004196 | 0,004222413 | 3,47564E-05 | 0,823  | 0,00385  | 0,004297 | 0,004126 | 0,004154 | 0,004198    | 0,004125024 | 0,000166606 | 4,039  |
| Q9D0K2 | SCOT1_MOUSE | Succinyl-CoA:3-ketoacid coenzyme A transferase 1, mitochondrial                   | 0,000501 | 0,000514 | 0,000544 | 0,000552 | 0,000527621 | 2,44665E-05 | 4,637  | 0,000568 | 0,000576 | 0,000609 | 0,000651 | 0,000605    | 0,000601924 | 3,27544E-05 | 5,442  |
| P48758 | CBR1_MOUSE  | Carbonyl reductase [NADPH] 1                                                      | 0,000426 | 0,000432 | 0,000443 | 0,000464 | 0,0004411   | 1,67444E-05 | 3,796  | 0,000447 | 0,000462 | 0,000498 | 0,000436 | 0,00045     | 0,000458655 | 2,40676E-05 | 5,247  |
| Q08529 | CAN2_MOUSE  | Calpain-2 catalytic subunit                                                       | 0,000119 | 0,000138 | 0,000114 | 0,00013  | 0,000125207 | 1,05986E-05 | 8,465  | 8,76E-05 | 0,000123 | 0,00012  | 0,000125 | 0,000119    | 0,000114918 | 1,54162E-05 | 13,415 |
| P45376 | ALDR_MOUSE  | Aldehyde reductase                                                                | 0,000155 | 0,000243 | 0,00033  | 0,000275 | 0,000250818 | 7,32371E-05 | 29,199 | 0,000239 | 0,000194 | 0,000214 | 0,000219 | 0,000207    | 0,000214487 | 1,62534E-05 | 7,578  |
| Q9CZ13 | QCR1_MOUSE  | Cytochrome b-c1 complex subunit 1, mitochondrial                                  | 0,002663 | 0,002531 | 0,002471 | 0,00249  | 0,002538851 | 8,6253E-05  | 3,397  | 0,002305 | 0,002273 | 0,002477 | 0,002378 | 0,00238     | 0,002362657 | 7,90656E-05 | 3,346  |
| P20917 | MAG_MOUSE   | Myelin-associated glycoprotein                                                    | 0,001186 | 0,000939 | 0,000707 | 0,000862 | 0,000923479 | 0,000199949 | 21,652 | 0,000949 | 0,000892 | 0,001023 | 0,00094  | 0,000823    | 0,000925584 | 7,39712E-05 | 7,992  |
| P50247 | SAHH_MOUSE  | Adenosylhomocysteinase                                                            | 0,00044  | 0,000451 | 0,000453 | 0,000462 | 0,000451811 | 9,21877E-06 | 2,040  | 0,000444 | 0,000391 | 0,000451 | 0,000435 | 0,000434    | 0,000430923 | 2,3537E-05  | 5,462  |
| Q3UH81 | NT5D3_MOUSE | 5'-nucleotidase domain-containing protein 3                                       | 0,000137 | 0,000154 | 6,75E-05 | 0,000152 | 0,000127789 | 4,09192E-05 | 32,021 | 0,000123 | 0,000108 | 0,000129 | 0,000129 | 0,000102    | 0,000118582 | 1,23657E-05 | 10,428 |
| Q99K18 | DCTN2_MOUSE | Dynactin subunit 2                                                                | 0,000321 | 0,000377 | 0,000285 | 0,000351 | 0,000333865 | 3,95683E-05 | 11,852 | 0,000402 | 0,000364 | 0,000375 | 0,000375 | 0,000374    | 0,0003778   | 1,43725E-05 | 3,804  |
| Q60930 | VDAC2_MOUSE | Voltage-dependent anion-selective channel protein 2                               | 0,002274 | 0,002214 | 0,002085 | 0,002224 | 0,002199392 | 8,06896E-05 | 3,669  | 0,001907 | 0,001972 | 0,002012 | 0,001756 | 0,001609    | 0,001851129 | 0,000166933 | 9,018  |
| Q6Q477 | AT2B4_MOUSE | Plasma membrane calcium-transporting ATPase 4                                     | 6,94E-05 | 8,77E-05 | 0,000109 | 8,89E-05 | 8,88761E-05 | 1,6386E-05  | 18,437 | 0,000107 | 0,000102 | 0,000109 | 0,000115 | 0,000131    | 0,000111295 | 1,13181E-05 | 10,020 |
| Q921N5 | DX39B_MOUSE | Spliceosome RNA helicase Ddx39b                                                   | 0,000435 | 0,000461 | 0,000501 | 0,000505 | 0,000475711 | 3,36472E-05 | 7,073  | 0,000489 | 0,000413 | 0,0005   | 0,000502 | 0,00052     | 0,000484769 | 4,16405E-05 | 8,590  |
| Q80Y17 | L2GL1_MOUSE | Thellal(2) giant larvae protein homolog 1                                         | 2,97E-05 | 4,01E-05 | 3,15E-05 | 3,36E-05 | 3,37106E-05 | 4,5313E-06  | 13,442 | 3,67E-05 | 3,34E-05 | 4,21E-05 | 3,5E-05  | 3,52E-05    | 3,648E-05   | 3,34494E-06 | 9,169  |
| Q8BLK3 | LSAMP_MOUSE | Limbic system-associated membrane protein                                         | 0,000484 | 0,000578 | 0,000577 | 0,000584 | 0,00055603  | 4,7922E-05  | 8,619  | 0,00052  | 0,000554 | 0,000576 | 0,000539 | 0,000598    | 0,000557191 | 3,04658E-05 | 5,468  |
| P06837 | NEUM_MOUSE  | Neuromodulin                                                                      | 0,000228 | 0,000267 | 0,000209 | 0,000229 | 0,000233372 | 2,44168E-05 | 10,463 | 0,000233 | 0,000239 | 0,000247 | 0,000229 | 0,000265    | 0,000242603 | 1,40189E-05 | 5,779  |
| Q60676 | PPP5_MOUSE  | Serine/threonine-protein phosphatase 5                                            | 9,67E-05 | 8,75E-05 | 0,000106 | 9,15E-05 | 9,53421E-05 | 7,82387E-06 | 8,206  | 7,71E-05 | 7,21E-05 | 7,54E-05 | 7,59E-05 | 6,7E-05     | 7,34927E-05 | 4,07815E-06 | 5,549  |
| Q88GH2 | SAM50_MOUSE | Sorting and assembly machinery component 50 homolog                               | 0,000413 | 0,000367 | 0,000398 | 0,00039  | 0,00039187  | 1,91835E-05 | 4,895  | 0,000334 | 0,000337 | 0,000369 | 0,000342 | 0,000352    | 0,000346861 | 1,43156E-05 | 4,127  |
| Q9R1Q8 | TAGL3_MOUSE | Transgelin-3                                                                      | 0,000106 | 8,93E-05 | 7,91E-05 | 0,000104 | 9,44279E-05 | 1,25653E-05 | 13,307 | 9,7E-05  | 0,000107 | 0,000105 | 0,0001   | 7,07E-05    | 9,60471E-05 | 1,47526E-05 | 15,360 |
| Q88H95 | ECHM_MOUSE  | Enoyl-CoA hydratase, mitochondrial                                                | 0,000119 | 0,00012  | 0,000111 | 0,000134 | 0,000120888 | 9,74042E-06 | 8,057  | 0,000134 | 0,000143 | 0,000156 | 0,000165 | 0,000151    | 0,00014953  | 1,21427E-05 | 8,121  |
| Q9CW27 | SNAG_MOUSE  | Gamma-soluble NSF attachment protein                                              | 0,000406 | 0,000429 | 0,000426 | 0,000452 | 0,000428301 | 1,872E-05   | 4,371  | 0,000437 | 0,000407 | 0,000443 | 0,000401 | 0,000397    | 0,000416836 | 2,15228E-05 | 5,163  |
| Q93092 | TALDO_MOUSE | Transaldolase                                                                     | 0,000246 | 0,000255 | 0,000239 | 0,000269 | 0,000252221 | 1,28533E-05 | 5,096  | 0,000283 | 0,000257 | 0,000249 | 0,000214 | 0,000251756 | 2,47628E-05 | 9,836       |        |
| Q88G39 | SV2B_MOUSE  | Synaptic vesicle glycoprotein 2B                                                  | 0,000425 | 0,000366 | 0,000486 | 0,000434 | 0,000427638 | 4,93475E-05 | 11,540 | 0,000538 | 0,000424 | 0,000447 | 0,000437 | 0,000537    | 0,00047     |             |        |

|        |             |                                                                         |          |          |          |          |             |             |        |          |          |          |          |             |              |             |        |
|--------|-------------|-------------------------------------------------------------------------|----------|----------|----------|----------|-------------|-------------|--------|----------|----------|----------|----------|-------------|--------------|-------------|--------|
| Q00493 | CBPE_MOUSE  | Carboxypeptidase E                                                      | 7,46E-05 | 8,62E-05 | 8,27E-05 | 8,7E-05  | 8,26196E-05 | 5,65065E-06 | 6,839  | 7,35E-05 | 6,75E-05 | 7,9E-05  | 7,7E-05  | 7,7E-05     | 7,48106E-05  | 4,54545E-06 | 6,076  |
| Q62465 | VAT1_MOUSE  | Synaptic vesicle membrane protein VAT-1 homolog                         | 0,000403 | 0,000452 | 0,000448 | 0,000452 | 0,000438767 | 2,41084E-05 | 5,495  | 0,00035  | 0,000445 | 0,000375 | 0,000425 | 0,000435    | 0,00040598   | 4,10472E-05 | 10,111 |
| Q9D019 | SYRC_MOUSE  | Arginine--tRNA ligase, cytoplasmic                                      | 0,0001   | 0,00011  | 9,81E-05 | 9,86E-05 | 0,00010182  | 5,75255E-06 | 5,650  | 9,24E-05 | 9,13E-05 | 9,47E-05 | 8,43E-05 | 9,84E-05    | 9,22148E-05  | 5,21748E-06 | 5,658  |
| O55125 | NIP51_MOUSE | Protein Nip5p homolog 1                                                 | 0,000215 | 0,000218 | 0,000201 | 0,000237 | 0,000217424 | 1,49986E-05 | 6,898  | 0,000211 | 0,000137 | 0,000231 | 0,000224 | 0,000223    | 0,000205164  | 3,87076E-05 | 18,867 |
| P54071 | IDHP_MOUSE  | Isocitrate dehydrogenase [NADP], mitochondrial                          | 0,000321 | 0,000375 | 0,000332 | 0,00035  | 0,000344514 | 2,33914E-05 | 6,790  | 0,000303 | 0,000249 | 0,000344 | 0,000282 | 0,000327    | 0,000300891  | 3,71171E-05 | 12,336 |
| Q9DCT2 | NDU53_MOUSE | NADH dehydrogenase [ubiquinone] iron-sulfur protein 3, mitochondrial    | 0,000613 | 0,000543 | 0,000504 | 0,000549 | 0,000561247 | 3,46477E-05 | 6,173  | 0,000503 | 0,000532 | 0,000547 | 0,000497 | 0,000465    | 0,000514184  | 3,29763E-05 | 6,413  |
| Q9CWS0 | DDAH1_MOUSE | N(G),N(G)-dimethylarginine dimethylaminohydrolase 1                     | 0,000317 | 0,000293 | 0,000291 | 0,000309 | 0,000302484 | 1,25195E-05 | 4,139  | 0,000346 | 0,000331 | 0,000288 | 0,000309 | 0,000281    | 0,000310969  | 2,76662E-05 | 8,897  |
| Q8BW75 | AQFB_MOUSE  | Amino oxidase [flavin-containing] B                                     | 0,000247 | 0,000251 | 0,000231 | 0,00019  | 0,000229582 | 2,79323E-05 | 12,167 | 0,000249 | 0,000246 | 0,000273 | 0,000256 | 0,000274    | 0,000259839  | 1,31317E-05 | 5,054  |
| Q8OU65 | SEPT9_MOUSE | Septin-9                                                                | 6,83E-05 | 6,54E-05 | 6,77E-05 | 6,38E-05 | 6,63245E-05 | 2,07075E-06 | 3,122  | 7,76E-05 | 5,69E-05 | 6,9E-05  | 6,43E-05 | 6,76E-05    | 6,70764E-05  | 7,49882E-06 | 11,181 |
| P27546 | MAP4_MOUSE  | Microtubule-associated protein 4                                        | 0,000132 | 0,000124 | 0,000108 | 0,000114 | 0,000119356 | 1,05702E-05 | 8,856  | 0,00012  | 0,000112 | 0,000119 | 9,61E-05 | 0,000108    | 0,000110953  | 9,76432E-06 | 8,800  |
| P60487 | PLPP_MOUSE  | Pyridoxal phosphate phosphatase                                         | 0,000296 | 0,000283 | 0,000334 | 0,000324 | 0,000308982 | 2,38023E-05 | 7,703  | 0,000298 | 0,000279 | 0,000279 | 0,000289 | 0,000288    | 0,000286733  | 7,99387E-06 | 2,788  |
| Q91V41 | RAB14_MOUSE | Ras-related protein Rab-14                                              | 0,00052  | 0,00053  | 0,000556 | 0,000559 | 0,000541397 | 1,95216E-05 | 3,606  | 0,000533 | 0,000513 | 0,000594 | 0,000555 | 0,000527    | 0,000544481  | 3,16372E-05 | 5,811  |
| P61161 | ARP2_MOUSE  | Actin-related protein 2                                                 | 0,000492 | 0,000604 | 0,000622 | 0,000649 | 0,00059182  | 6,90366E-05 | 11,665 | 0,000627 | 0,000569 | 0,000666 | 0,000661 | 0,000691    | 0,000642949  | 4,71721E-05 | 7,337  |
| Q9DB20 | ATPO_MOUSE  | ATP synthase subunit O, mitochondrial                                   | 0,001304 | 0,001198 | 0,001337 | 0,001208 | 0,001261778 | 6,91868E-05 | 5,483  | 0,001206 | 0,001245 | 0,001254 | 0,001328 | 0,00129     | 0,001264785  | 4,65604E-05 | 3,681  |
| Q8C437 | PEXSR_MOUSE | PEX5-related protein                                                    | 0,000121 | 0,000125 | 0,000102 | 0,000119 | 0,00011688  | 1,0035E-05  | 8,586  | 0,000124 | 0,000121 | 0,000116 | 0,000111 | 0,000101    | 0,00011449   | 9,23072E-06 | 8,062  |
| P14231 | AT1B2_MOUSE | Sodium/potassium-transporting ATPase subunit beta-2                     | 0,00166  | 0,001516 | 0,001451 | 0,001581 | 0,0015522   | 8,92339E-05 | 5,749  | 0,001384 | 0,001561 | 0,001609 | 0,001594 | 0,001355    | 0,001500588  | 0,000121378 | 8,089  |
| Q9CQ43 | SDHB_MOUSE  | Succinate dehydrogenase [ubiquinone] iron-sulfur subunit, mitochondrial | 0,00043  | 0,000396 | 0,000387 | 0,000418 | 0,000407757 | 1,97554E-05 | 4,845  | 0,000388 | 0,000425 | 0,000417 | 0,000396 | 0,000354    | 0,000395929  | 2,79585E-05 | 7,061  |
| Q61753 | SERA_MOUSE  | D-3-phosphoglycerate dehydrogenase                                      | 0,000607 | 0,000605 | 0,000578 | 0,000578 | 0,000603374 | 3,42338E-05 | 5,674  | 0,000613 | 0,00061  | 0,000623 | 0,000603 | 0,000554    | 0,000605814  | 3,00154E-05 | 4,955  |
| Q9D8E6 | RL4_MOUSE   | 60S ribosomal protein L4                                                | 9,69E-05 | 0,000105 | 0,000102 | 0,000107 | 0,000102709 | 4,25206E-06 | 4,140  | 9,52E-05 | 9,05E-05 | 0,000101 | 9,12E-05 | 9,77E-05    | 9,51563E-05  | 4,48689E-06 | 4,715  |
| Q9CR62 | M2OM_MOUSE  | Mitochondrial 2-oxoglutarate/malate carrier protein                     | 0,001142 | 0,001077 | 0,001048 | 0,001084 | 0,001087732 | 3,96503E-05 | 3,645  | 0,000858 | 0,000818 | 0,000949 | 0,000876 | 0,000735    | 0,000846954  | 7,86035E-05 | 9,281  |
| P68254 | 1433T_MOUSE | 14-3-3 protein theta                                                    | 0,000964 | 0,000596 | 0,000864 | 0,000738 | 0,000790238 | 0,000159076 | 20,130 | 0,000745 | 0,00084  | 0,000696 | 0,000689 | 0,000605    | 0,000715183  | 8,61526E-05 | 12,046 |
| Q9QX56 | DREB_MOUSE  | Debrin                                                                  | 0,000462 | 0,000502 | 0,000597 | 0,000544 | 0,000526238 | 5,78235E-05 | 10,988 | 0,000491 | 0,000403 | 0,000468 | 0,000487 | 0,000523    | 0,000474492  | 4,45909E-05 | 9,398  |
| Q91VR2 | ATPG_MOUSE  | ATP synthase subunit gamma, mitochondrial                               | 0,001478 | 0,001344 | 0,001392 | 0,001504 | 0,001429542 | 7,41112E-05 | 5,184  | 0,001377 | 0,001443 | 0,001464 | 0,001332 | 0,001257    | 0,001374688  | 8,4033E-05  | 6,113  |
| P17742 | PPIA_MOUSE  | Peptidyl-prolyl cis-trans isomerase A                                   | 0,003599 | 0,003696 | 0,004655 | 0,004631 | 0,00414531  | 0,000576116 | 13,898 | 0,00388  | 0,003851 | 0,004237 | 0,0042   | 0,004014    | 0,004036307  | 0,000177897 | 4,407  |
| Q99P71 | GDIR1_MOUSE | Rho GDP-dissociation inhibitor 1                                        | 0,000822 | 0,000785 | 0,000792 | 0,000823 | 0,00080558  | 1,97449E-05 | 2,451  | 0,00085  | 0,000894 | 0,000917 | 0,000856 | 0,000791    | 0,000861331  | 4,83777E-05 | 5,617  |
| Q9JH15 | IVD_MOUSE   | Isovaleryl-CoA dehydrogenase, mitochondrial                             | 0,000279 | 0,000303 | 0,000285 | 0,000297 | 0,000291131 | 1,07855E-05 | 3,705  | 0,000262 | 0,000296 | 0,000298 | 0,000278 | 0,000261    | 0,000278958  | 1,78721E-05 | 6,407  |
| Q99PJ0 | NTRI_MOUSE  | Neurotrimin                                                             | 0,000246 | 0,000248 | 0,000309 | 0,000264 | 0,000266601 | 2,92194E-05 | 10,960 | 0,000257 | 0,000236 | 0,000203 | 0,000237 | 0,000262    | 0,00024458   | 1,39285E-05 | 5,695  |
| Q8R1Q8 | DC1L1_MOUSE | Cytoplasmic dynein 1 light intermediate chain 1                         | 0,000149 | 0,000155 | 0,000152 | 0,000104 | 0,000140211 | 2,41324E-05 | 17,211 | 0,000165 | 0,000145 | 0,000156 | 0,00015  | 0,00015     | 0,00015327   | 7,90335E-06 | 5,156  |
| Q9R0V5 | KAD1_MOUSE  | Adenylate kinase isoenzyme 1                                            | 0,000534 | 0,000541 | 0,000558 | 0,00054  | 0,000543102 | 1,01225E-05 | 1,864  | 0,000545 | 0,00054  | 0,000541 | 0,000512 | 0,000484    | 0,000524259  | 2,60393E-05 | 4,967  |
| P17879 | HS71B_MOUSE | Heat shock 70 kDa protein 1B                                            | 6,82E-05 | 0,000106 | 0,000101 | 9E-05    | 9,12488E-05 | 1,67448E-05 | 18,351 | 7,39E-05 | 6,82E-05 | 8,15E-05 | 7,44E-05 | 8,03E-05    | 7,56847E-05  | 5,37558E-06 | 7,103  |
| Q9Z0X1 | AIFM1_MOUSE | Apoptosis-inducing factor 1, mitochondrial                              | 2,95E-05 | 2,69E-05 | 2,49E-05 | 2,5E-05  | 2,65843E-05 | 1,16992E-06 | 8,151  | 2,47E-05 | 2,16E-05 | 2,33E-05 | 2,03E-05 | 2,02E-05    | 2,20258E-05  | 1,94996E-06 | 8,853  |
| O55234 | PSB5_MOUSE  | Proteasome subunit beta-5                                               | 0,000267 | 0,000303 | 0,000308 | 0,000306 | 0,000296051 | 1,97952E-05 | 6,856  | 0,000297 | 0,0003   | 0,000323 | 0,000294 | 0,000266    | 0,000296082  | 2,01874E-05 | 6,818  |
| P12658 | CALB1_MOUSE | Calbindin                                                               | 6,23E-05 | 6,47E-05 | 6,51E-05 | 7,12E-05 | 6,58224E-05 | 3,81691E-06 | 5,799  | 5,37E-05 | 5,86E-05 | 6,13E-05 | 6,56E-05 | 5,91397E-05 | 4,5625E-06   | 7,715       |        |
| Q9QZQ8 | H2AY_MOUSE  | Core histone macro-H2A.1                                                | 0,000247 | 0,000282 | 0,000258 | 0,000296 | 0,000270958 | 2,21376E-05 | 8,170  | 0,000264 | 0,000234 | 0,000283 | 0,000249 | 0,000243    | 0,000254776  | 1,92228E-05 | 7,545  |
| Q8VE33 | GD1L1_MOUSE | Ganglioside-induced differentiation-associated protein 1-like 1         | 7,91E-05 | 9,82E-05 | 0,000101 | 9,5E-05  | 9,33965E-05 | 9,82386E-06 | 10,525 | 9,72E-05 | 8,59E-05 | 9,93E-05 | 9,04E-05 | 9,65E-05    | 9,18461E-05  | 4,88071E-06 | 5,314  |
| P11448 | RL7_MOUSE   | 60S ribosomal protein L7                                                | 0,000232 | 0,000273 | 0,000296 | 0,000285 | 0,000271403 | 2,76803E-05 | 10,199 | 0,000238 | 0,000253 | 0,000208 | 0,00024  | 0,000242    | 0,000250591  | 1,72179E-05 | 6,871  |
| Q61885 | MOG_MOUSE   | Myelin-oligodendrocyte glycoprotein                                     | 0,000865 | 0,00079  | 0,00075  | 0,000842 | 0,000811682 | 5,21513E-05 | 6,425  | 0,000794 | 0,001106 | 0,001091 | 0,000974 | 0,000806    | 0,000954338  | 0,000149951 | 15,713 |
| P19157 | GSTP1_MOUSE | Glutathione S-transferase P 1                                           | 0,001605 | 0,001584 | 0,001651 | 0,001719 | 0,00163997  | 5,98189E-05 | 3,648  | 0,001654 | 0,001745 | 0,001914 | 0,001822 | 0,001526    | 0,001731976  | 0,000149968 | 8,659  |
| P00920 | CAH2_MOUSE  | Carbonic anhydrase 2                                                    | 0,002219 | 0,001847 | 0,001784 | 0,002089 | 0,001984733 | 0,000204024 | 10,280 | 0,001891 | 0,001522 | 0,001974 | 0,001807 | 0,001435    | 0,0001725687 | 0,000235322 | 13,636 |
| Q8BH44 | COR2B_MOUSE | Coronin-2B                                                              | 0,000178 | 0,000159 | 0,00013  | 0,000144 | 0,000152744 | 2,03697E-05 | 13,336 | 0,000148 | 0,000118 | 0,000138 | 0,000156 | 0,000143    | 0,000140438  | 1,43888E-05 | 10,246 |
| Q91ZU6 | DYST_MOUSE  | Dystonin                                                                | 3,3E-05  | 4,43E-05 | 4,85E-05 | 4,57E-05 | 4,28873E-05 | 6,81859E-06 | 15,899 | 4,5E-05  | 3,5E-05  | 4,14E-05 | 3,96E-05 | 3,83E-05    | 3,98647E-05  | 3,6765E-06  | 9,223  |
| Q8BV14 | DHPR_MOUSE  | Dihydropyridine reductase                                               | 0,001055 | 0,000978 | 0,000835 | 0,000951 | 0,000954669 | 9,13292E-05 | 9,567  | 0,001053 | 0,000942 | 0,001063 | 0,000949 | 0,000717    | 0,000944635  | 0,000139293 | 14,746 |
| Q9D0M3 | CY1_MOUSE   | Cytochrome c1, heme protein, mitochondrial                              | 0,001368 | 0,001136 | 0,001308 | 0,0013   | 0,001339373 | 3,48689E-05 | 2,614  | 0,001304 | 0,001307 | 0,001343 | 0,001259 | 0,001276    | 0,001297689  | 3,2323E-05  | 2,492  |
| P57746 | VATD_MOUSE  | V-type proton ATPase subunit D                                          | 0,000586 | 0,000622 | 0,000629 | 0,000657 | 0,000623185 | 2,92585E-05 | 4,695  | 0,000669 | 0,000584 | 0,000647 | 0,000623 | 0,000528    | 0,000610168  | 5,56521E-05 | 9,121  |
| O88533 | DDC_MOUSE   | Aromatic L-amino-acid decarboxylase                                     | 4,77E-05 | 4,43E-05 | 4,33E-05 | 4,39E-05 | 4,48072E-05 | 2,00516E-06 | 4,475  | 3,76E-05 | 2,95E-05 | 4,3E-05  | 5,59E-05 | 5,29E-05    | 4,37826E-05  | 1,08746E-05 | 24,838 |
| P24369 | PPIB_MOUSE  | Peptidyl-prolyl cis-trans isomerase B                                   | 0,000164 | 0,000187 | 0,000187 | 0,000152 | 0,000172291 | 1,74123E-05 | 10,106 | 0,000174 | 0,000181 | 0,000187 | 0,000173 | 0,000169    | 0,000176854  | 7,18425E-06 | 4,062  |
| P08226 | APOE_MOUSE  | Apolipoprotein E                                                        | 0,000215 | 0,000197 | 0,000186 | 0,000183 | 0,000195011 | 1,45318E-05 | 7,452  | 0,00019  | 0,000181 | 0,000194 | 0,000187 | 0,000181    | 0,000186585  | 5,79452E-06 | 3,106  |
| P61982 | 1433G_MOUSE | 14-3-3 protein gamma                                                    | 0,001764 | 0,001863 | 0,001784 | 0,001786 | 0,001799218 | 4,38767E-05 | 2,439  | 0,001648 | 0,001924 | 0,001826 | 0,00169  | 0,001624    | 0,001742494  | 0,000128231 | 7,359  |
| O54983 | CRYM_MOUSE  | Ketimine reductase mu-crystallin                                        | 0,000434 | 0,000438 | 0,000527 | 0,000455 | 0,000463468 | 4,36226E-05 | 9,412  | 0,000434 | 0,000378 | 0,000502 | 0,000524 | 0,000698    | 0,000488467  | 0,000141039 | 28,874 |
| P29758 | OAT_MOUSE   | Ornithine aminotransferase, mitochondrial                               | 0,000245 | 0,00025  | 0,000266 | 0,000262 | 0,0002554   | 9,95831E-06 | 3,899  | 0,000244 | 0,00023  | 0,000252 | 0,000259 | 0,000235    | 0,000243889  | 1,20287E-05 | 4,932  |
| P49312 | ROA1_MOUSE  | Heterogeneous nuclear ribonucleoprotein A1                              | 0,000319 | 0,000359 | 0,000372 | 0,000401 | 0,000362833 | 3,38579E-05 | 9,332  | 0,000402 | 0,000326 | 0,000396 | 0,000376 | 0,000333    | 0,000366521  | 3,54432E-05 | 9,670  |
| Q8R3V5 | SHLB2_MOUSE | Endophilin-B2                                                           | 0,000259 | 0,000286 | 0,000296 | 0,000264 | 0,000276241 | 1,78113E-05 | 6,448  | 0,000267 | 0,000241 | 0,000274 | 0,000244 | 0,000282    |              |             |        |

|        |             |                                                                      |          |          |          |          |              |             |        |          |          |          |          |          |              |             |        |
|--------|-------------|----------------------------------------------------------------------|----------|----------|----------|----------|--------------|-------------|--------|----------|----------|----------|----------|----------|--------------|-------------|--------|
| P19783 | COX41_MOUSE | Cytochrome c oxidase subunit 4 isoform 1, mitochondrial              | 0,001192 | 0,001235 | 0,001302 | 0,001173 | 0,001225551  | 5,70954E-05 | 4,659  | 0,001157 | 0,001165 | 0,001366 | 0,0013   | 0,001187 | 0,001235034  | 9,34163E-05 | 7,564  |
| P28740 | KIF2A_MOUSE | Kinesin-like protein KIF2A                                           | 0,000103 | 0,000121 | 0,000107 | 0,000115 | 0,000111343  | 7,91336E-06 | 7,107  | 0,000115 | 0,000107 | 0,000116 | 0,000111 | 0,000111 | 0,000111964  | 3,54251E-06 | 3,164  |
| O55126 | NIP52_MOUSE | Protein NipSnap homolog 2                                            | 0,000379 | 0,000378 | 0,000366 | 0,000378 | 0,000374884  | 6,22929E-06 | 1,662  | 0,000367 | 0,00032  | 0,000375 | 0,000383 | 0,000389 | 0,00036681   | 2,73836E-05 | 7,465  |
| Q9D8Y0 | EFHD2_MOUSE | EF-hand domain-containing protein D2                                 | 0,001    | 0,000805 | 0,000765 | 0,000828 | 0,000849632  | 0,000103878 | 12,226 | 0,000975 | 0,000866 | 0,000833 | 0,000847 | 0,000728 | 0,000849645  | 8,80373E-05 | 10,362 |
| Q91V61 | SFXN3_MOUSE | Sideroflexin-3                                                       | 0,000597 | 0,000523 | 0,000629 | 0,000517 | 0,000566495  | 5,5321E-05  | 9,765  | 0,000555 | 0,000508 | 0,000499 | 0,000513 | 0,000573 | 0,000529696  | 3,2092E-05  | 6,059  |
| P09671 | SODM_MOUSE  | Superoxide dismutase [Mn], mitochondrial                             | 0,000647 | 0,000619 | 0,000576 | 0,000588 | 0,000607923  | 3,19444E-05 | 5,255  | 0,000633 | 0,000672 | 0,000611 | 0,000553 | 0,000553 | 0,000604283  | 5,19425E-05 | 8,596  |
| P62821 | RAB1A_MOUSE | Ras-related protein Rab-1A                                           | 0,000548 | 0,000426 | 0,000516 | 0,000513 | 0,000410576  | 0,000177515 | 43,236 | 0,000504 | 0,000629 | 0,000451 | 0,000486 | 0,000449 | 0,000503929  | 7,36612E-05 | 14,617 |
| Q99LC5 | ETFA_MOUSE  | Electron transfer flavoprotein subunit alpha, mitochondrial          | 0,000425 | 0,000402 | 0,000365 | 0,000423 | 0,000408284  | 2,90663E-05 | 7,119  | 0,000393 | 0,000406 | 0,000402 | 0,000378 | 0,000389 | 0,000404441  | 3,24981E-05 | 8,035  |
| Q91VM5 | RMXL1_MOUSE | RNA binding motif protein, X-linked-like-1                           | 0,000214 | 0,000227 | 0,000259 | 0,000248 | 0,000236713  | 2,03946E-05 | 8,616  | 0,000228 | 0,00021  | 0,000234 | 0,000216 | 0,00024  | 0,000225651  | 1,26565E-05 | 5,609  |
| P63158 | HMG81_MOUSE | High mobility group protein B1                                       | 3,83E-05 | 3,8E-05  | 3,59E-05 | 4,68E-05 | 3,97425E-05  | 4,8033E-06  | 12,086 | 3,98E-05 | 3,86E-05 | 5,12E-05 | 3,78E-05 | 3,74E-05 | 4,09623E-05  | 5,7924E-06  | 14,141 |
| Q61792 | LASP1_MOUSE | LIM and SH3 domain protein 1                                         | 4,08E-05 | 3,73E-05 | 3,13E-05 | 4E-05    | 3,73521E-05  | 4,27536E-06 | 11,446 | 4E-05    | 3,9E-05  | 3,77E-05 | 3,3E-05  | 2,49E-05 | 3,49229E-05  | 6,22489E-06 | 17,825 |
| O70161 | PI5C_MOUSE  | Phosphatidylinositol 4-phosphate 5-kinase type-1 gamma               | 9,16E-05 | 9,3E-05  | 8,08E-05 | 9,42E-05 | 8,98969E-05  | 6,17926E-06 | 6,874  | 0,000103 | 8,74E-05 | 8,82E-05 | 9,46E-05 | 0,000109 | 9,64059E-05  | 9,36672E-06 | 9,716  |
| Q88LQ9 | CADM2_MOUSE | Cell adhesion molecule 2                                             | 0,000416 | 0,000403 | 0,000398 | 0,000373 | 0,000397484  | 1,79947E-05 | 4,527  | 0,000457 | 0,000429 | 0,000416 | 0,000445 | 0,000431 | 0,00043549   | 1,56607E-05 | 3,596  |
| Q62WN5 | RS9_MOUSE   | 40S ribosomal protein S9                                             | 9,82E-05 | 0,000108 | 0,000114 | 0,000115 | 0,000108861  | 7,9044E-06  | 7,261  | 9,53E-05 | 9,85E-05 | 0,000108 | 0,000103 | 8,94E-05 | 9,86972E-05  | 6,95986E-06 | 7,052  |
| Q80224 | NEGR1_MOUSE | Neuronal growth regulator 1                                          | 0,000232 | 0,000252 | 0,000315 | 0,00025  | 0,000262348  | 3,6451E-05  | 13,894 | 0,000271 | 0,000242 | 0,000247 | 0,000265 | 0,000284 | 0,000261652  | 1,73951E-05 | 6,648  |
| P35279 | RAB6A_MOUSE | Ras-related protein Rab-6A                                           | 6,47E-05 | 6,51E-05 | 7,43E-05 | 7,5E-05  | 6,97737E-05  | 5,65791E-06 | 8,109  | 8,6E-05  | 8,2E-05  | 1E-04    | 0,000109 | 8,49E-05 | 9,22917E-05  | 1,14767E-05 | 12,435 |
| P27601 | GNA13_MOUSE | Guanine nucleotide-binding protein subunit alpha-13                  | 7,79E-05 | 7,42E-05 | 7,91E-05 | 7,58E-05 | 7,673E-05    | 2,16205E-06 | 2,818  | 7,44E-05 | 7,26E-05 | 7,58E-05 | 8,02E-05 | 7,16E-05 | 7,49353E-05  | 3,36769E-06 | 4,494  |
| P46638 | RB11B_MOUSE | Ras-related protein Rab-11B                                          | 0,00104  | 0,001068 | 0,001072 | 0,00113  | 0,001077493  | 3,78118E-05 | 3,509  | 0,000971 | 0,001036 | 0,001114 | 0,000986 | 0,000869 | 0,000995386  | 9,01143E-05 | 9,053  |
| Q92U11 | PSA5_MOUSE  | Proteasome subunit alpha type-5                                      | 0,000206 | 0,00022  | 0,00022  | 0,000222 | 0,000217064  | 7,44874E-06 | 3,432  | 0,000207 | 0,000199 | 0,000234 | 0,000217 | 0,000205 | 0,00021253   | 1,36733E-05 | 6,434  |
| Q91Z53 | GRHR_MOUSE  | Glyoxylate reductase/hydroxypyruvate reductase                       | 0,000229 | 0,000245 | 0,000171 | 0,000259 | 0,000225829  | 3,8407E-05  | 17,007 | 0,000254 | 0,000222 | 0,0002   | 0,000243 | 0,00015  | 0,000213713  | 4,11424E-05 | 19,251 |
| P63001 | RAC1_MOUSE  | Ras-related C3 botulinum toxin substrate 1                           | 7,3E-05  | 7,03E-05 | 0,000101 | 9E-05    | 8,34489E-05  | 1,43393E-05 | 17,183 | 7,15E-05 | 0,000103 | 8,89E-05 | 8,53E-05 | 0,000105 | 9,08331E-05  | 1,39039E-05 | 15,307 |
| Q9D172 | ES1_MOUSE   | ES1 protein homolog, mitochondrial                                   | 0,000197 | 0,000202 | 0,000186 | 0,000204 | 0,000197499  | 8,12076E-06 | 4,112  | 0,000205 | 0,000231 | 0,000199 | 0,000191 | 0,000174 | 0,000199988  | 2,08271E-05 | 10,414 |
| P68510 | 1433F_MOUSE | 14-3-3 protein eta                                                   | 0,000722 | 0,000735 | 0,000746 | 0,000763 | 0,000741551  | 1,71806E-05 | 2,317  | 0,000759 | 0,000729 | 0,000748 | 0,000658 | 0,000588 | 0,000696471  | 7,22883E-05 | 10,379 |
| Q9D6M3 | GHC1_MOUSE  | Mitochondrial glutamate carrier 1                                    | 0,00037  | 0,00032  | 0,000405 | 0,000392 | 0,000371705  | 3,75212E-05 | 10,094 | 0,000348 | 0,00034  | 0,000372 | 0,000317 | 0,000329 | 0,000341112  | 2,07301E-05 | 6,077  |
| Q9DB05 | SNAA_MOUSE  | Alpha-soluble NSF attachment protein                                 | 0,000417 | 0,000402 | 0,000386 | 0,000408 | 0,000403363  | 1,31317E-05 | 3,256  | 0,000386 | 0,000385 | 0,000387 | 0,000344 | 0,000307 | 0,000361756  | 3,58476E-05 | 9,909  |
| Q6PDM2 | SRSF1_MOUSE | Serine/arginine-rich splicing factor 1                               | 0,000141 | 0,000156 | 0,000155 | 0,000157 | 0,000152577  | 7,55495E-06 | 4,952  | 0,000151 | 0,000144 | 0,000164 | 0,000146 | 0,000135 | 0,000148067  | 1,07059E-05 | 7,230  |
| P00493 | HPRT_MOUSE  | Hypoxanthine-guanine phosphoribosyltransferase                       | 0,00027  | 0,000312 | 0,000311 | 0,000331 | 0,000306197  | 2,55978E-05 | 8,360  | 0,000289 | 0,000301 | 0,000352 | 0,000389 | 0,000325 | 0,000331422  | 4,023E-05   | 12,139 |
| O50203 | IMPA1_MOUSE | Inositol monophosphate 1                                             | 0,000488 | 0,000466 | 0,000572 | 0,000554 | 0,000520118  | 5,10208E-05 | 9,808  | 0,000449 | 0,000437 | 0,000457 | 0,000422 | 0,000376 | 0,000428399  | 3,18372E-05 | 7,432  |
| Q92204 | HNRPC_MOUSE | Heterogeneous nuclear ribonucleoproteins C1/C2                       | 0,000356 | 0,000376 | 0,000388 | 0,000392 | 0,000372287  | 1,66382E-05 | 4,810  | 0,000381 | 0,000336 | 0,000375 | 0,000406 | 0,000408 | 0,0004381069 | 2,92091E-05 | 7,665  |
| P10126 | EF1A1_MOUSE | Elongation factor 1-alpha                                            | 0,000955 | 0,001104 | 0,000978 | 0,000996 | 0,001007994  | 6,59415E-05 | 6,542  | 0,001096 | 0,00119  | 0,001181 | 0,001281 | 0,001204 | 0,001190383  | 6,58978E-05 | 5,536  |
| P97315 | CSR1_MOUSE  | Cysteine and glycine-rich protein 1                                  | 0,000323 | 0,000331 | 0,000272 | 0,000304 | 0,000307534  | 2,64476E-05 | 8,600  | 0,000339 | 0,000306 | 0,000312 | 0,000284 | 0,000265 | 0,000301174  | 2,83704E-05 | 9,420  |
| Q8CAV6 | THIC_MOUSE  | Acetyl-CoA acetyltransferase, cytosolic                              | 7,65E-05 | 0,000111 | 0,000127 | 0,000121 | 0,000108818  | 2,25493E-05 | 20,722 | 0,000106 | 8,49E-05 | 0,000113 | 6,04E-05 | 8,3E-05  | 8,94446E-05  | 2,07893E-05 | 23,243 |
| Q8K183 | PDXK_MOUSE  | Pyridoxal kinase                                                     | 0,000407 | 0,00048  | 0,000455 | 0,000477 | 0,000454675  | 3,3421E-05  | 7,351  | 0,000393 | 0,000442 | 0,000475 | 0,000438 | 0,000456 | 0,000440937  | 3,04034E-05 | 6,895  |
| Q8CDN6 | TXNL1_MOUSE | Thioredoxin-like protein 1                                           | 0,000102 | 0,000118 | 0,000109 | 0,000116 | 0,000111307  | 7,25532E-06 | 6,518  | 0,000114 | 0,000111 | 0,000123 | 0,000109 | 0,00011  | 0,000113335  | 5,79145E-06 | 5,110  |
| Q9CQJ8 | NDUB9_MOUSE | NADH dehydrogenase [ubiquinone] 1 beta subcomplex subunit 9          | 0,000222 | 0,000191 | 0,000207 | 0,000202 | 0,000205373  | 1,25573E-05 | 6,114  | 0,000174 | 0,000146 | 0,000172 | 0,000135 | 0,000134 | 0,000151999  | 1,934E-05   | 12,724 |
| Q77Q13 | OTUB1_MOUSE | Ubiquitin thioesterase OTUB1                                         | 0,001024 | 0,00113  | 0,001107 | 0,001114 | 0,001093753  | 4,76339E-05 | 4,355  | 0,001081 | 0,000992 | 0,001025 | 0,000951 | 0,000857 | 0,000981256  | 8,39975E-05 | 8,560  |
| Q8R164 | BPHL_MOUSE  | Valacyclovir hydrolase                                               | 0,000212 | 0,000215 | 0,000229 | 0,000226 | 0,000220554  | 8,36065E-06 | 3,791  | 0,000225 | 0,000239 | 0,000238 | 0,000232 | 0,00023  | 0,000232879  | 5,60235E-06 | 2,406  |
| Q3ULI0 | GPDI1_MOUSE | Glycerol-3-phosphate dehydrogenase 1-like protein                    | 0,000113 | 0,000122 | 0,000129 | 0,000123 | 0,000121707  | 6,7386E-06  | 5,537  | 0,000113 | 0,000112 | 0,000136 | 0,000125 | 0,000123 | 0,000125421  | 9,0523E-06  | 7,218  |
| Q8CHH9 | SEPT8_MOUSE | Septin-8                                                             | 0,000399 | 0,000399 | 0,000348 | 0,00038  | 0,000381629  | 2,44755E-05 | 6,413  | 0,000425 | 0,000372 | 0,000396 | 0,000418 | 0,000384 | 0,000399013  | 2,20992E-05 | 5,538  |
| Q64105 | SPRE_MOUSE  | Septaplerin reductase                                                | 0,000264 | 0,000293 | 0,000278 | 0,000283 | 0,000279454  | 1,19E-05    | 4,258  | 0,000288 | 0,000305 | 0,000289 | 0,000281 | 0,000267 | 0,000286072  | 1,36309E-05 | 4,765  |
| P63094 | GNAS2_MOUSE | Guanine nucleotide-binding protein G(s) subunit alpha isoforms short | 0,000255 | 0,000264 | 0,000221 | 0,000277 | 0,000254278  | 2,4046E-05  | 9,457  | 0,000234 | 0,000202 | 0,000262 | 0,000262 | 0,000157 | 0,000223397  | 4,45118E-05 | 19,925 |
| Q60931 | VDAC3_MOUSE | Voltage-dependent anion-selective channel protein 3                  | 0,001319 | 0,001181 | 0,001269 | 0,001224 | 0,001248291  | 5,91038E-05 | 4,735  | 0,001101 | 0,001264 | 0,001161 | 0,000981 | 0,000937 | 0,001088709  | 0,000132845 | 12,202 |
| P62827 | RAN_MOUSE   | GTP-binding nuclear protein Ran                                      | 0,000225 | 0,000239 | 0,000254 | 0,000251 | 0,000242361  | 1,31427E-05 | 5,423  | 0,00022  | 0,0002   | 0,000222 | 0,000218 | 0,000233 | 0,000218381  | 1,1908E-05  | 5,453  |
| Q9DCL9 | PUR6_MOUSE  | Multifunctional protein ADE2                                         | 0,000156 | 0,000152 | 0,000134 | 0,000138 | 0,000144691  | 1,07011E-05 | 7,396  | 0,000145 | 0,000133 | 0,000142 | 0,000149 | 0,000127 | 0,000139101  | 8,84797E-06 | 6,361  |
| Q9WUM5 | SUCA_MOUSE  | Succinate-CoA ligase [ADP/GDP-forming] subunit alpha, mitochondrial  | 0,000346 | 0,000333 | 0,000331 | 0,000352 | 0,00034058   | 1,01676E-05 | 2,985  | 0,000352 | 0,00036  | 0,000357 | 0,000336 | 0,000349 | 0,000350896  | 9,59116E-06 | 2,733  |
| P45591 | COF2_MOUSE  | Cofilin-2                                                            | 0,000275 | 0,000272 | 0,000282 | 0,000302 | 0,000282671  | 1,34545E-05 | 4,760  | 0,000267 | 0,000214 | 0,000256 | 0,000298 | 0,000232 | 0,000253339  | 3,25248E-05 | 12,838 |
| P52196 | THTR_MOUSE  | Thioalulfate sulfurtransferase                                       | 0,000306 | 0,000303 | 0,000291 | 0,000307 | 0,0003031619 | 7,64089E-06 | 2,533  | 0,000306 | 0,000297 | 0,000301 | 0,000274 | 0,000225 | 0,000280309  | 3,34561E-05 | 11,935 |
| P70441 | NHRF1_MOUSE | Na(+)/H(+) exchange regulatory cofactor NHE-RF1                      | 8,74E-05 | 8,94E-05 | 9,56E-05 | 8,93E-05 | 9,04082E-05  | 3,5626E-06  | 3,941  | 9,08E-05 | 7,72E-05 | 8,63E-05 | 7,94E-05 | 8,78E-05 | 8,43071E-05  | 5,73991E-06 | 6,808  |
| Q9CR89 | MIC19_MOUSE | MICOS complex subunit Mic19                                          | 5,31E-05 | 5,4E-05  | 6,27E-05 | 5,53E-05 | 5,62743E-05  | 4,39497E-06 | 7,810  | 5,24E-05 | 4,89E-05 | 5,47E-05 | 4,37E-05 | 4,24E-05 | 4,84174E-05  | 5,31127E-06 | 10,970 |
| Q9CQM9 | GLRX3_MOUSE | Glutaredoxin-3                                                       | 0,000117 | 0,00012  | 0,000107 | 0,000112 | 0,000114068  | 5,82226E-06 | 5,104  | 0,000119 | 0,000115 | 0,000121 | 0,000112 | 0,000109 | 0,00011523   | 5,30538E-06 | 4,604  |
| Q62348 | TSN_MOUSE   | Translin                                                             | 0,000134 | 0,000146 | 0,000166 | 0,000182 | 0,00015679   | 2,10126E-05 | 13,402 | 0,000133 | 0,000125 | 0,000145 | 0,000138 | 0,000119 | 0,000132155  | 1,04769E-05 | 7,928  |
| P14206 | RSSA_MOUSE  | 40S ribosomal protein SA                                             | 0,00036  | 0,000409 | 0,000412 | 0,000393 | 0,000393604  | 2,35155E-05 | 5,974  | 0,000385 | 0,000353 | 0,000394 | 0,000374 | 0,000383 |              |             |        |



|        |              |                                                                               |          |          |          |          |             |             |        |          |          |          |          |           |              |             |        |
|--------|--------------|-------------------------------------------------------------------------------|----------|----------|----------|----------|-------------|-------------|--------|----------|----------|----------|----------|-----------|--------------|-------------|--------|
| Q3U0V1 | FUBP2_MOUSE  | Far upstream element-binding protein 2                                        | 0,00014  | 0,000211 | 0,000204 | 0,000187 | 0,000185441 | 3,18344E-05 | 17,167 | 0,000184 | 0,000163 | 0,000171 | 0,000176 | 0,000203  | 0,000179453  | 1,54215E-05 | 8,594  |
| Q9DBP5 | KCY_MOUSE    | UMP-CMP kinase                                                                | 0,000373 | 0,00037  | 0,000389 | 0,0004   | 0,000382959 | 1,44726E-05 | 3,779  | 0,000389 | 0,000383 | 0,000407 | 0,000408 | 0,000385  | 0,0003943    | 1,22803E-05 | 3,114  |
| Q61171 | PRDX2_MOUSE  | Peroxiredoxin-2                                                               | 0,001491 | 0,001542 | 0,001785 | 0,001551 | 0,001592473 | 0,000131369 | 8,249  | 0,001321 | 0,001286 | 0,001309 | 0,001276 | 0,001277  | 0,001293841  | 2,01572E-05 | 1,558  |
| P62962 | PROF1_MOUSE  | Perfilin-1                                                                    | 0,001042 | 0,001354 | 0,001355 | 0,001284 | 0,001258636 | 0,000148483 | 11,797 | 0,00114  | 0,001141 | 0,001233 | 0,001163 | 0,001127  | 0,001160909  | 4,24301E-05 | 3,655  |
| P59999 | ARPC4_MOUSE  | Actin-related protein 2/3 complex subunit 4                                   | 0,000165 | 0,000192 | 0,000205 | 0,0002   | 0,000190307 | 1,76258E-05 | 9,262  | 0,000156 | 0,000136 | 0,00017  | 0,000159 | 0,000159  | 0,000155939  | 1,23969E-05 | 7,950  |
| Q9QY10 | DNJA2_MOUSE  | DnaJ homolog subfamily A member 2                                             | 8,52E-05 | 8,84E-05 | 8,55E-05 | 8,51E-05 | 8,60381E-05 | 1,55144E-06 | 1,803  | 7,82E-05 | 7,98E-05 | 8,4E-05  | 7,99E-05 | 8,404E-05 | 8,20778E-05  | 4,14043E-06 | 5,045  |
| Q8BV05 | PPME1_MOUSE  | Protein phosphatase methyltransferase 1                                       | 0,000119 | 0,000116 | 0,00012  | 0,000122 | 0,000119277 | 2,1906E-06  | 1,837  | 0,000125 | 9,87E-05 | 0,000113 | 0,000123 | 0,000118  | 0,000115346  | 1,03917E-05 | 9,009  |
| P62983 | RS27A_MOUSE  | Ubiquitin-40S ribosomal protein S27a                                          | 0,001663 | 0,001905 | 0,001786 | 0,001751 | 0,00177637  | 0,000100236 | 5,643  | 0,001741 | 0,001601 | 0,001581 | 0,001573 | 0,001595  | 0,0001618299 | 6,93762E-05 | 4,287  |
| Q9WTT4 | VATG2_MOUSE  | V-type proton ATPase subunit G 2                                              | 4,06E-05 | 4,82E-05 | 5,17E-05 | 5,65E-05 | 4,92248E-05 | 6,71287E-06 | 13,637 | 5,95E-05 | 5,52E-05 | 6,66E-05 | 5,75E-05 | 5,23E-05  | 5,82365E-05  | 5,39375E-06 | 9,262  |
| O70435 | PSA3_MOUSE   | Proteasome subunit alpha type-3                                               | 0,000213 | 0,000213 | 0,000211 | 0,000231 | 0,000216995 | 9,15358E-06 | 4,218  | 0,000216 | 0,000227 | 0,000235 | 0,000216 | 0,000196  | 0,000217831  | 1,44853E-05 | 6,650  |
| P62897 | CYC_MOUSE    | Cytochrome c, somatic                                                         | 0,000828 | 0,000985 | 0,000978 | 0,000982 | 0,000943244 | 7,71983E-05 | 8,184  | 0,00092  | 0,001006 | 0,001049 | 0,000974 | 0,00094   | 0,000977748  | 5,15501E-05 | 5,272  |
| P14131 | RS16_MOUSE   | 40S ribosomal protein S16                                                     | 0,000204 | 0,000239 | 0,000235 | 0,000234 | 0,000228212 | 1,60399E-05 | 7,029  | 0,000194 | 0,000176 | 0,000236 | 0,000201 | 0,000189  | 0,000199276  | 2,24041E-05 | 11,243 |
| O55022 | PGRC1_MOUSE  | Membrane-associated progesterone receptor component 1                         | 0,000111 | 0,000131 | 0,000149 | 0,000147 | 0,000134404 | 1,73616E-05 | 12,917 | 0,000104 | 0,000124 | 0,00014  | 0,000126 | 0,000122  | 0,000123099  | 1,30532E-05 | 10,604 |
| Q60668 | HNRPD_MOUSE  | Heterogeneous nuclear ribonucleoprotein D0                                    | 0,000131 | 0,000136 | 0,000138 | 0,000172 | 0,000143961 | 1,87525E-05 | 13,026 | 0,000143 | 0,00012  | 0,000165 | 0,000174 | 0,00017   | 0,00015458   | 2,2579E-05  | 14,607 |
| Q64433 | CH10_MOUSE   | 10 kDa heat shock protein, mitochondrial                                      | 0,00018  | 0,000251 | 0,000257 | 0,000225 | 0,000228081 | 3,51205E-05 | 15,398 | 0,000174 | 0,000218 | 0,00022  | 0,000228 | 0,000205  | 0,000209184  | 2,12721E-05 | 10,169 |
| P47911 | RL6_MOUSE    | 60S ribosomal protein L6                                                      | 0,00028  | 0,000322 | 0,000311 | 0,000326 | 0,000309977 | 2,08163E-05 | 6,715  | 0,000316 | 0,000288 | 0,000297 | 0,000285 | 0,000309  | 0,00029894   | 1,33353E-05 | 4,461  |
| Q5PR73 | DIRA2_MOUSE  | GTP-binding protein Di-Ras2                                                   | 0,000208 | 0,000184 | 0,000191 | 0,000195 | 0,000194574 | 1,02507E-05 | 5,268  | 0,000246 | 0,000194 | 0,000201 | 0,000215 | 0,000185  | 0,000208203  | 2,37546E-05 | 11,409 |
| Q9CP01 | COX6C_MOUSE  | Cytochrome c oxidase subunit 6C                                               | 0,000474 | 0,000512 | 0,000562 | 0,000513 | 0,000515385 | 3,62425E-05 | 7,032  | 0,000463 | 0,000449 | 0,000506 | 0,000495 | 0,000418  | 0,00046613   | 3,53713E-05 | 7,588  |
| P63321 | RALA_MOUSE   | Ras-related protein RaL-a                                                     | 0,00027  | 0,000252 | 0,000262 | 0,000263 | 0,000261656 | 7,52408E-06 | 2,876  | 0,000278 | 0,000281 | 0,00028  | 0,000261 | 0,000255  | 0,000271207  | 1,19569E-05 | 4,409  |
| P35802 | GPMA6_MOUSE  | Neuronal membrane glycoprotein MG-a                                           | 0,000301 | 0,000296 | 0,000383 | 0,000342 | 0,000330414 | 4,05233E-05 | 12,264 | 0,000328 | 0,000344 | 0,000324 | 0,000232 | 0,000245  | 0,000294544  | 5,19045E-05 | 17,622 |
| Q8BJ11 | S6A17_MOUSE  | Sodium-dependent neutral amino acid transporter SLC6A17                       | 0,000101 | 0,000118 | 0,000123 | 0,000115 | 0,000114126 | 9,7275E-06  | 8,523  | 0,000117 | 0,000101 | 0,000107 | 0,0001   | 0,000126  | 0,000110168  | 1,11407E-05 | 10,112 |
| Q92201 | MARCC2_MOUSE | Mitochondrial amidoxime reducing component 2                                  | 0,000109 | 0,000113 | 0,000121 | 0,00011  | 0,000113179 | 5,46744E-06 | 4,831  | 8,65E-05 | 0,000105 | 9,98E-05 | 8,89E-05 | 8,9E-05   | 9,376E-05    | 7,93805E-06 | 8,466  |
| Q62433 | NDRG1_MOUSE  | Protein NDRG1                                                                 | 0,000253 | 0,000251 | 0,0002   | 0,000214 | 0,000229504 | 2,67806E-05 | 11,669 | 0,000292 | 0,000247 | 0,000288 | 0,000303 | 0,000266  | 0,000279037  | 2,25508E-05 | 8,082  |
| O90961 | PSB1_MOUSE   | Proteasome subunit beta type-1                                                | 0,000246 | 0,00022  | 0,000234 | 0,000245 | 0,00023641  | 1,22276E-05 | 5,172  | 0,000228 | 0,000216 | 0,000247 | 0,00026  | 0,000245  | 0,000239382  | 1,71013E-05 | 7,144  |
| Q9ERS2 | NDUAD_MOUSE  | NADH dehydrogenase [ubiquinone] 1 alpha subcomplex subunit 13                 | 0,000496 | 0,000556 | 0,000533 | 0,000528 | 0,000528365 | 2,48018E-05 | 4,694  | 0,000488 | 0,000532 | 0,000572 | 0,000568 | 0,000524  | 0,00053668   | 3,46636E-05 | 6,459  |
| Q99LR1 | ABD12_MOUSE  | Monoacylglycerol lipase ABHD12                                                | 5,97E-05 | 5,79E-05 | 5,91E-05 | 5,65E-05 | 5,82753E-05 | 1,41206E-06 | 2,423  | 5,23E-05 | 5,27E-05 | 5,85E-05 | 5,11E-05 | 5,25E-05  | 5,34355E-05  | 2,90486E-06 | 5,436  |
| Q99MR8 | MCCA_MOUSE   | Methycrotonoyl-CoA carboxylase subunit alpha, mitochondrial                   | 9,74E-05 | 0,000117 | 0,000101 | 9,68E-05 | 0,000103059 | 9,68435E-06 | 9,397  | 9,49E-05 | 0,000101 | 9,72E-05 | 8,82E-05 | 9,33E-05  | 9,49287E-05  | 4,71307E-06 | 4,965  |
| P18242 | CATD_MOUSE   | Cathepsin D                                                                   | 0,000526 | 0,00054  | 0,000563 | 0,000558 | 0,000546908 | 1,68897E-05 | 3,088  | 0,000399 | 0,000481 | 0,000547 | 0,00044  | 0,000454  | 0,000463791  | 5,49015E-05 | 11,838 |
| P21018 | PRDX3_MOUSE  | Thioredoxin-dependent peroxide reductase, mitochondrial                       | 0,000603 | 0,000613 | 0,000687 | 0,000754 | 0,000714229 | 0,000134403 | 18,818 | 0,000528 | 0,0005   | 0,000522 | 0,000537 | 0,000475  | 0,000512389  | 2,49603E-05 | 4,871  |
| Q99L47 | F10A1_MOUSE  | Hsc70-interacting protein                                                     | 0,000326 | 0,00034  | 0,000303 | 0,000323 | 0,000323295 | 1,52889E-05 | 4,729  | 0,000323 | 0,000309 | 0,000332 | 0,000338 | 0,000335  | 0,000327431  | 1,18319E-05 | 3,614  |
| P60202 | MYPR_MOUSE   | Myelin proteolipid protein                                                    | 0,002925 | 0,002822 | 0,002013 | 0,002663 | 0,002605602 | 0,000409736 | 15,725 | 0,002976 | 0,002373 | 0,003359 | 0,00265  | 0,002198  | 0,002890942  | 0,000477135 | 16,504 |
| Q9D710 | TMX2_MOUSE   | Thioredoxin-related transmembrane protein 2                                   | 0,000159 | 0,000159 | 0,00016  | 0,000163 | 0,000160143 | 1,64714E-06 | 1,029  | 0,000146 | 0,000159 | 0,000139 | 0,00014  | 0,000126  | 0,000141963  | 1,20182E-05 | 8,466  |
| Q9QYF9 | NDRG3_MOUSE  | Protein NDRG3                                                                 | 0,000424 | 0,000409 | 0,000423 | 0,000423 | 0,000419707 | 7,16877E-06 | 1,708  | 0,000402 | 0,000391 | 0,000417 | 0,000402 | 0,000387  | 0,000399896  | 1,16322E-05 | 2,909  |
| P97797 | SHPS1_MOUSE  | Tyrosine-protein phosphatase non-receptor type substrate 1                    | 0,000374 | 0,000345 | 0,000397 | 0,000342 | 0,000364614 | 2,57562E-05 | 7,064  | 0,000302 | 0,000311 | 0,000274 | 0,000283 | 0,000305  | 0,000303909  | 2,98522E-05 | 9,823  |
| Q9QY76 | VAPB_MOUSE   | Vesicle-associated membrane protein-associated protein B                      | 0,00014  | 0,000149 | 0,000136 | 0,000135 | 0,000140022 | 6,47371E-06 | 4,623  | 0,000161 | 0,000159 | 0,000157 | 0,000148 | 0,000138  | 0,000152511  | 9,67246E-06 | 6,342  |
| P57759 | ERP29_MOUSE  | Endoplasmic reticulum resident protein 29                                     | 0,000169 | 0,000178 | 0,000191 | 0,000188 | 0,000181415 | 9,7758E-06  | 5,389  | 0,000173 | 0,000151 | 0,000191 | 0,00018  | 0,000176  | 0,000174215  | 1,4688E-05  | 8,431  |
| P84096 | RHOQ_MOUSE   | Rho-related GTP-binding protein RhoG                                          | 0,000213 | 0,000186 | 0,000181 | 0,000193 | 0,000193255 | 1,41691E-05 | 7,332  | 0,000197 | 0,000209 | 0,000237 | 0,000193 | 0,000175  | 0,000202292  | 2,28519E-05 | 11,297 |
| Q791V5 | MITCH2_MOUSE | Mitochondrial carrier homolog 2                                               | 0,000541 | 0,000511 | 0,000506 | 0,000519 | 0,00051906  | 1,56578E-05 | 3,017  | 0,000476 | 0,000495 | 0,000503 | 0,000455 | 0,000423  | 0,000470444  | 3,23839E-05 | 6,884  |
| P62270 | RS18_MOUSE   | 40S ribosomal protein S18                                                     | 0,00011  | 0,000135 | 0,000144 | 0,000135 | 0,000131063 | 1,48788E-05 | 11,352 | 0,000112 | 0,000123 | 0,00014  | 0,000122 | 0,000118  | 0,000122768  | 1,05811E-05 | 8,619  |
| P61089 | UBE2N_MOUSE  | Ubiquitin-conjugating enzyme E2 N                                             | 0,000613 | 0,000738 | 0,000706 | 0,000703 | 0,000690105 | 5,39091E-05 | 7,812  | 0,000654 | 0,000712 | 0,000709 | 0,000621 | 0,000642  | 0,000667596  | 4,07913E-05 | 6,110  |
| Q9EP19 | ARFG1_MOUSE  | ADP-ribosylation factor GTPase-activating protein 1                           | 9,79E-05 | 8,67E-05 | 9,69E-05 | 9,42E-05 | 9,39287E-05 | 1,57035E-06 | 5,437  | 9,36E-05 | 8,09E-05 | 8,02E-05 | 8,58E-05 | 8,59E-05  | 8,52927E-05  | 5,36869E-06 | 6,294  |
| Q62421 | SH3G3_MOUSE  | Endophilin-A3                                                                 | 0,000599 | 0,000499 | 0,000486 | 0,000499 | 0,000520682 | 5,23514E-05 | 10,054 | 0,000602 | 0,000462 | 0,000488 | 0,000506 | 0,000496  | 0,000510519  | 5,35937E-05 | 10,498 |
| Q9CR86 | TPPPP3_MOUSE | Tubulin polymerization-promoting protein family member 3                      | 9E-05    | 0,00011  | 8,95E-05 | 9,95E-05 | 9,71664E-05 | 9,4903E-06  | 9,767  | 0,000105 | 0,00011  | 0,000103 | 0,000107 | 8,43E-05  | 0,00010185   | 1,01099E-05 | 9,926  |
| Q3UGR5 | HDHD2_MOUSE  | Haloacid dehalogenase-like hydrolase domain-containing protein 2              | 0,000118 | 9,57E-05 | 0,000108 | 0,000116 | 0,000109243 | 1,00341E-05 | 9,185  | 0,000101 | 6,91E-05 | 9,78E-05 | 9,69E-05 | 7,91E-05  | 8,88045E-05  | 1,39733E-05 | 15,735 |
| Q9CQH3 | NDU5_MOUSE   | NADH dehydrogenase [ubiquinone] 1 beta subcomplex subunit 5, mitochondrial    | 0,000446 | 0,000494 | 0,000426 | 0,000457 | 0,000455438 | 2,85801E-05 | 6,275  | 0,000371 | 0,000385 | 0,000409 | 0,000353 | 0,000351  | 0,000373804  | 2,42523E-05 | 6,488  |
| Q9DC70 | NDU57_MOUSE  | NADH dehydrogenase [ubiquinone] iron-sulfur protein 7, mitochondrial          | 0,000234 | 0,000241 | 0,000237 | 0,000237 | 0,000236996 | 2,98636E-06 | 1,260  | 0,000205 | 0,000216 | 0,000222 | 0,000207 | 0,000179  | 0,000205943  | 1,66729E-05 | 8,096  |
| Q88K29 | ODPX_MOUSE   | Pyruvate dehydrogenase protein X component, mitochondrial                     | 0,000126 | 0,000117 | 0,000118 | 0,000114 | 0,000118758 | 5,26132E-06 | 4,429  | 0,000104 | 9,38E-05 | 9,87E-05 | 0,000103 | 9,69E-05  | 9,92688E-05  | 4,27059E-06 | 4,302  |
| Q9D898 | ARPSL_MOUSE  | Actin-related protein 2/3 complex subunit 5-like protein                      | 0,000206 | 0,000208 | 0,000204 | 0,000224 | 0,000219657 | 1,5665E-05  | 7,131  | 0,000222 | 0,000198 | 0,000205 | 0,000198 | 0,000203  | 0,000205239  | 9,59009E-06 | 4,848  |
| Q9R1P0 | PSA4_MOUSE   | Proteasome subunit alpha type-4                                               | 6,89E-05 | 7,22E-05 | 6,88E-05 | 7,51E-05 | 7,12621E-05 | 3,02997E-06 | 4,252  | 6,49E-05 | 2,99E-05 | 6,53E-05 | 7,69E-05 | 5,65E-05  | 5,86842E-05  | 1,76561E-05 | 30,087 |
| P23927 | CRYAB_MOUSE  | Alpha-crystallin B chain                                                      | 0,000136 | 0,000157 | 0,00012  | 0,000168 | 0,000145253 | 2,12965E-05 | 14,662 | 0,000176 | 0,000188 | 0,0002   | 0,000173 | 0,000152  | 0,000177776  | 1,7908E-05  | 10,073 |
| O54734 | OST48_MOUSE  | Dolichyl-diphosphooligosaccharide--protein glycosyltransferase 48 kDa subunit | 9,01E-05 | 8,91E-05 | 8,98E-05 | 9,2E-05  | 9,02534E-05 | 1,26151E-06 | 1,398  | 9,21E-05 | 7,19E-05 | 9,15E-05 | 8,17E-05 | 8,08E-05  | 8,35963E-05  | 8,42708E-06 | 10,081 |
| Q9CQD1 | RAB5A_MOUSE  | Ras-related protein Rab-5A                                                    | 0,000135 | 0,000136 | 0,000152 | 0,000139 | 0,000140707 | 7,94317E-06 |        |          |          |          |          |           |              |             |        |

|         |             |                                                                      |          |          |          |          |             |             |        |          |          |          |          |           |             |             |        |
|---------|-------------|----------------------------------------------------------------------|----------|----------|----------|----------|-------------|-------------|--------|----------|----------|----------|----------|-----------|-------------|-------------|--------|
| Q61205  | PA1B3_MOUSE | Platelet-activating factor acetylhydrolase IB subunit gamma          | 5,92E-05 | 6,23E-05 | 6,85E-05 | 7,89E-05 | 6,72579E-05 | 8,69979E-06 | 12,935 | 5,18E-05 | 5,79E-05 | 5,56E-05 | 5,45E-05 | 4,87E-05  | 5,36826E-05 | 3,57226E-06 | 6,654  |
| Q8C166  | CPNE1_MOUSE | Copine-1                                                             | 3E-05    | 2,61E-05 | 3,17E-05 | 3,15E-05 | 2,98209E-05 | 2,5758E-06  | 8,638  | 2,86E-05 | 2,12E-05 | 3,1E-05  | 3,43E-05 | 2,72E-05  | 2,84337E-05 | 4,87307E-06 | 17,138 |
| Q61206  | PA1B2_MOUSE | Platelet-activating factor acetylhydrolase IB subunit beta           | 0,000557 | 0,000561 | 0,000644 | 0,000612 | 0,000593341 | 4,17723E-05 | 7,040  | 0,000505 | 0,000489 | 0,000534 | 0,000527 | 0,000472  | 0,000505262 | 2,58399E-05 | 5,114  |
| P62422  | RS8_MOUSE   | 40S ribosomal protein S8                                             | 0,0003   | 0,000346 | 0,00036  | 0,000366 | 0,000342839 | 3,0021E-05  | 8,757  | 0,0003   | 0,000324 | 0,000348 | 0,000294 | 0,000303  | 0,00031372  | 2,21338E-05 | 7,055  |
| Q8K311  | NDU8_MOUSE  | NADH dehydrogenase [ubiquinone] iron-sulfur protein 8, mitochondrial | 0,000751 | 0,000715 | 0,000671 | 0,000715 | 0,000712879 | 3,28329E-05 | 4,606  | 0,000596 | 0,00057  | 0,000716 | 0,000688 | 0,000617  | 0,000637383 | 6,21275E-05 | 9,747  |
| Q99L86  | MAT2B_MOUSE | Methionine adenosyltransferase 2 subunit beta                        | 6,04E-05 | 5,47E-05 | 5,69E-05 | 5,36E-05 | 5,63927E-05 | 2,98647E-06 | 5,296  | 5,91E-05 | 5,13E-05 | 5,3E-05  | 5,12E-05 | 4,75E-05  | 5,24308E-05 | 4,24038E-06 | 8,088  |
| Q99L9V  | NDU5_MOUSE  | NADH dehydrogenase [ubiquinone] iron-sulfur protein 5                | 0,000124 | 0,000119 | 0,000126 | 0,000128 | 0,00012411  | 3,83323E-06 | 3,089  | 0,000102 | 0,000113 | 0,000121 | 9,75E-05 | 9,74E-05  | 0,000106048 | 1,04588E-05 | 9,862  |
| P32037  | GTR3_MOUSE  | Solute carrier family 2, facilitated glucose transporter member 3    | 0,000199 | 0,000202 | 0,000176 | 0,000179 | 0,000189257 | 1,32858E-05 | 7,020  | 0,000231 | 0,000211 | 0,000216 | 0,000214 | 0,000221  | 0,000218499 | 7,87423E-06 | 3,604  |
| Q6PDL0  | DC1L2_MOUSE | Cytoplasmic dynein 1 light intermediate chain 2                      | 0,000103 | 9,43E-05 | 8,82E-05 | 8,75E-05 | 9,32803E-05 | 7,21932E-06 | 7,739  | 9,83E-05 | 8,36E-05 | 8,78E-05 | 8,8E-05  | 7,92E-05  | 8,73753E-05 | 7,09354E-06 | 8,118  |
| Q3THE2  | ML12B_MOUSE | Myosin regulatory light chain 12B                                    | 0,000146 | 0,000135 | 0,000142 | 0,000126 | 0,000137394 | 8,85656E-06 | 6,446  | 0,000144 | 0,000145 | 0,000137 | 0,000108 | 0,000125  | 0,000132012 | 1,53406E-05 | 11,621 |
| P47963  | RL13_MOUSE  | 60S ribosomal protein L13                                            | 0,00032  | 0,000379 | 0,000385 | 0,000426 | 0,000377546 | 4,35797E-05 | 11,543 | 0,000357 | 0,000349 | 0,000382 | 0,000332 | 0,000332  | 0,000350646 | 2,0681E-05  | 5,898  |
| P10605  | CATB_MOUSE  | Cathepsin B                                                          | 0,000107 | 0,000115 | 0,000136 | 0,000131 | 0,000122327 | 1,36915E-05 | 11,201 | 0,000129 | 0,000134 | 0,000131 | 0,000107 | 0,000102  | 0,000120436 | 1,45824E-05 | 12,108 |
| P35979  | RL12_MOUSE  | 60S ribosomal protein L12                                            | 9,83E-05 | 0,000116 | 0,000121 | 0,000123 | 0,000114606 | 1,1332E-05  | 9,888  | 0,00011  | 0,000132 | 0,000125 | 0,000113 | 0,000128  | 0,000121536 | 9,60659E-06 | 7,904  |
| Q35344  | IMA4_MOUSE  | Importin subunit alpha-4                                             | 3,83E-05 | 4,41E-05 | 4,33E-05 | 4,21E-05 | 4,19651E-05 | 2,56275E-06 | 6,107  | 4,33E-05 | 3,96E-05 | 4,22E-05 | 4,19E-05 | 3,88E-05  | 4,11439E-05 | 1,87152E-06 | 4,549  |
| Q05816  | FABP5_MOUSE | Fatty acid-binding protein, epidermal                                | 0,000333 | 0,0004   | 0,000368 | 0,000391 | 0,000372941 | 2,95275E-05 | 7,917  | 0,000353 | 0,000341 | 0,000407 | 0,000375 | 0,000325  | 0,000360604 | 3,19602E-05 | 8,863  |
| Q6Z1W3  | RL10_MOUSE  | 60S ribosomal protein L10                                            | 5,43E-05 | 6,02E-05 | 6,92E-05 | 7,43E-05 | 6,44919E-05 | 8,975E-06   | 13,916 | 6,99E-05 | 6,77E-05 | 8,97E-05 | 7,94E-05 | 7,5E-05   | 7,63336E-05 | 8,7538E-06  | 11,468 |
| P51410  | RL9_MOUSE   | 60S ribosomal protein L9                                             | 0,000163 | 0,000194 | 0,00019  | 0,000216 | 0,000190769 | 2,18379E-05 | 11,447 | 0,000174 | 0,000169 | 0,000197 | 0,000173 | 0,000148  | 0,00017213  | 1,75337E-05 | 10,186 |
| Q9JKC6  | CEND_MOUSE  | Cell cycle exit and neuronal differentiation protein 1               | 7,2E-05  | 7,52E-05 | 4,7E-05  | 6,25E-05 | 6,41578E-05 | 1,264E-05   | 19,701 | 7,19E-05 | 8,82E-05 | 7,72E-05 | 7,62E-05 | 6,49E-05  | 7,56874E-05 | 8,49919E-06 | 11,229 |
| P24288  | BCAT1_MOUSE | Branched-chain-amino-acid aminotransferase, cytosolic                | 0,000179 | 0,000181 | 0,000203 | 0,000195 | 0,000189348 | 1,12671E-05 | 9,590  | 0,000172 | 0,000177 | 0,000175 | 0,000171 | 0,000153  | 0,000169536 | 9,50921E-06 | 5,609  |
| Q81ZU2  | TXTP_MOUSE  | Tricarboxylate transport protein, mitochondrial                      | 0,000113 | 0,000121 | 0,000127 | 0,000134 | 0,000128066 | 5,69093E-06 | 4,444  | 0,000109 | 0,000124 | 0,00013  | 0,000125 | 0,000108  | 0,000119208 | 1,0155E-05  | 8,519  |
| P60766  | CDC42_MOUSE | Cell division control protein 42 homolog                             | 0,000525 | 0,000575 | 0,000507 | 0,000546 | 0,000538287 | 2,90939E-05 | 5,405  | 0,000485 | 0,000522 | 0,000514 | 0,000517 | 0,000455  | 0,000498557 | 2,8463E-05  | 5,709  |
| Q91XL9  | OSBL1_MOUSE | Oxysterol-binding protein-related protein 1                          | 7,87E-05 | 7,81E-05 | 7,21E-05 | 6,11E-05 | 7,24884E-05 | 8,15309E-06 | 11,247 | 8,03E-05 | 7,26E-05 | 7,33E-05 | 7,42E-05 | 6,89E-05  | 7,3856E-05  | 4,15801E-06 | 5,630  |
| P97370  | AT1B3_MOUSE | Sodium/potassium-transporting ATPase subunit beta-3                  | 0,000175 | 0,000158 | 0,000134 | 0,000152 | 0,00015489  | 1,68327E-05 | 10,867 | 0,000164 | 0,000165 | 0,000165 | 0,000157 | 0,000133  | 0,000156926 | 1,35692E-05 | 8,647  |
| Q9CPR4  | RL17_MOUSE  | 60S ribosomal protein L17                                            | 0,00012  | 0,000135 | 0,000126 | 0,000126 | 0,000126673 | 6,44712E-06 | 5,090  | 0,000115 | 0,000121 | 0,000129 | 0,000107 | 0,000106  | 0,000115698 | 9,35401E-06 | 8,085  |
| Q9J1M76 | ARPC3_MOUSE | Actin-related protein 2/3 complex subunit 3                          | 0,00013  | 0,000245 | 0,000242 | 0,000293 | 0,000227652 | 6,90146E-05 | 30,316 | 0,000244 | 0,000258 | 0,000284 | 0,000339 | 0,000307  | 0,000286358 | 3,76593E-05 | 13,151 |
| Q80UW2  | FBX2_MOUSE  | F-box only protein 2                                                 | 0,00021  | 0,000206 | 0,000199 | 0,000195 | 0,000202553 | 5,59631E-06 | 3,257  | 0,000178 | 0,000169 | 0,000179 | 0,000168 | 0,000138  | 0,00016635  | 1,67686E-05 | 10,080 |
| Q9CQ92  | FIS1_MOUSE  | Mitochondrial fission 1 protein                                      | 7,58E-05 | 9,73E-05 | 8,72E-05 | 8E-05    | 8,50638E-05 | 9,40449E-06 | 11,056 | 8,83E-05 | 0,000137 | 9,74E-05 | 8,42E-05 | 9,37E-05  | 0,000100907 | 2,11424E-05 | 21,122 |
| Q9DD18  | DTD1_MOUSE  | D-tyrosyl-tRNA(Tyr) deacylase 1                                      | 9,68E-05 | 9,23E-05 | 9,92E-05 | 0,000102 | 9,77058E-05 | 4,26804E-06 | 4,368  | 9,52E-05 | 0,000102 | 9,61E-05 | 8,65E-05 | 7,98E-05  | 9,18414E-05 | 8,64549E-06 | 9,413  |
| Q6Z277  | SYPH_MOUSE  | Synaptophysin                                                        | 0,001115 | 0,001083 | 0,001416 | 0,001409 | 0,001255747 | 0,00018136  | 14,442 | 0,000989 | 0,001155 | 0,001111 | 0,000119 | 0,0001243 | 0,000137474 | 9,59452E-05 | 8,435  |
| Q99K88  | GLO2_MOUSE  | Hydroxyacylglutathione hydrolase, mitochondrial                      | 0,000176 | 0,000158 | 0,000177 | 0,000194 | 0,000176121 | 1,45315E-05 | 8,251  | 0,000172 | 0,000195 | 0,000173 | 0,000145 | 0,00013   | 0,0001628   | 2,5326E-05  | 15,557 |
| Q9QZ06  | TOLIP_MOUSE | Toll-interacting protein                                             | 0,000181 | 0,000193 | 0,000193 | 0,000206 | 0,000193364 | 1,05492E-05 | 5,456  | 0,000194 | 0,000184 | 0,000189 | 0,00019  | 0,000168  | 0,000184991 | 9,97473E-06 | 5,392  |
| Q9CQC7  | NDU8_MOUSE  | NADH dehydrogenase [ubiquinone] 1 beta subcomplex subunit 4          | 0,000192 | 0,000195 | 0,00019  | 0,000165 | 0,000185263 | 1,35997E-05 | 7,341  | 0,000145 | 0,000185 | 0,000184 | 0,000155 | 0,000163  | 0,000166292 | 1,74857E-05 | 10,515 |
| Q99JY8  | PLPP3_MOUSE | Phospholipid phosphatase 3                                           | 0,000148 | 0,000158 | 0,000167 | 0,000152 | 0,000155973 | 8,21834E-06 | 5,269  | 0,000149 | 0,000179 | 0,000136 | 0,000137 | 0,000137  | 0,000147531 | 1,84009E-05 | 12,473 |
| P01831  | THY1_MOUSE  | Thy-1 membrane glycoprotein                                          | 0,001792 | 0,001711 | 0,001892 | 0,001834 | 0,001807136 | 7,62735E-05 | 4,221  | 0,001864 | 0,001766 | 0,001801 | 0,001644 | 0,001574  | 0,000172914 | 0,000118269 | 6,837  |
| Q9CQV8  | 1433B_MOUSE | 14-3-3 protein beta/alpha                                            | 0,001272 | 0,001011 | 0,00101  | 0,001262 | 0,00113859  | 0,000148027 | 13,001 | 0,001103 | 0,001204 | 0,00113  | 0,000963 | 0,000733  | 0,0010266   | 0,000186104 | 18,128 |
| Q9CR95  | NECP1_MOUSE | Adaptin ear-binding coat-associated protein 1                        | 8,85E-05 | 0,000111 | 0,000102 | 0,000102 | 0,000100885 | 9,34052E-06 | 9,259  | 0,000105 | 9,42E-05 | 9,22E-05 | 9,04E-05 | 9,89E-05  | 9,61587E-05 | 5,8857E-06  | 6,121  |
| P84244  | H33_MOUSE   | #N/A                                                                 | 0,000674 | 0,000926 | 0,000806 | 0,000946 | 0,00083786  | 0,000125719 | 15,005 | 0,000626 | 0,000765 | 0,000941 | 0,00075  | 0,000687  | 0,000575394 | 0,000118133 | 15,669 |
| P62141  | PP1B_MOUSE  | Serine/threonine-protein phosphatase PP1-beta catalytic subunit      | 0,000223 | 0,000228 | 0,000232 | 0,000231 | 0,000228659 | 4,224E-06   | 1,847  | 0,000244 | 0,000255 | 0,000268 | 0,00024  | 0,000253  | 0,000251944 | 1,08585E-05 | 4,310  |
| Q70493  | SNX12_MOUSE | Sorting nexin-12                                                     | 6,76E-05 | 6,94E-05 | 6,97E-05 | 7,35E-05 | 7,00454E-05 | 2,48151E-06 | 3,543  | 7,02E-05 | 7,32E-05 | 6,98E-05 | 7,36E-05 | 6,72E-05  | 7,07906E-05 | 2,63336E-06 | 3,720  |
| P56391  | CX6B1_MOUSE | Cytochrome c oxidase subunit 6B1                                     | 0,000262 | 0,000301 | 0,000392 | 0,000316 | 0,000317855 | 5,45486E-05 | 17,161 | 0,000198 | 0,000299 | 0,000254 | 0,000243 | 0,00029   | 0,000256585 | 4,03773E-05 | 15,736 |
| Q77NG5  | EMAL2_MOUSE | Echinoderm microtubule-associated protein-like 2                     | 3,96E-05 | 4,16E-05 | 3,38E-05 | 3,41E-05 | 3,72958E-05 | 3,92405E-06 | 10,521 | 3,9E-05  | 3,92E-05 | 3,18E-05 | 3,16E-05 | 3,17E-05  | 3,46726E-05 | 4,03528E-06 | 11,638 |
| Q9CQ75  | NDUA2_MOUSE | NADH dehydrogenase [ubiquinone] 1 alpha subcomplex subunit 2         | 0,000114 | 0,000132 | 0,000151 | 0,000117 | 0,000128309 | 1,70374E-05 | 13,278 | 0,000103 | 0,000123 | 0,000135 | 0,000112 | 0,000118  | 0,000118149 | 1,1998E-05  | 10,155 |
| Q99M71  | EPDR1_MOUSE | Mammalian ependymin-related protein 1                                | 0,000214 | 0,000194 | 0,000215 | 0,000237 | 0,00021516  | 1,78136E-05 | 8,279  | 0,000193 | 0,000219 | 0,000187 | 0,000171 | 0,000153  | 0,000184454 | 2,46887E-05 | 13,385 |
| P57776  | EF1D_MOUSE  | Elongation factor 1-delta                                            | 0,000191 | 0,000201 | 0,000187 | 0,000199 | 0,000194382 | 6,38488E-06 | 3,285  | 0,000196 | 0,000191 | 0,000201 | 0,000197 | 0,000184  | 0,000193763 | 6,43869E-06 | 3,323  |
| Q8BGS5  | MIRO1_MOUSE | Mitochondrial Rho GTPase 1                                           | 7,95E-05 | 9,16E-05 | 7,98E-05 | 8,16E-05 | 8,31287E-05 | 5,73784E-06 | 6,902  | 7,46E-05 | 6,66E-05 | 7,7E-05  | 8,05E-05 | 7,63E-05  | 7,49746E-05 | 5,17158E-06 | 6,898  |
| P63028  | TCTP_MOUSE  | Translationally-controlled tumor protein                             | 0,000116 | 0,000117 | 0,000116 | 0,000117 | 0,000116529 | 1,88084E-07 | 0,161  | 0,000113 | 0,000115 | 0,000114 | 0,000109 | 0,000104  | 0,000111163 | 4,42153E-06 | 3,978  |
| P55088  | AQP4_MOUSE  | Aquaporin-4                                                          | 7,71E-05 | 8,72E-05 | 6,35E-05 | 7,37E-05 | 7,53842E-05 | 9,78252E-06 | 12,977 | 0,000105 | 0,000106 | 0,000116 | 9,73E-05 | 8,87E-05  | 0,000102404 | 1,01606E-05 | 9,922  |
| Q62048  | PEA15_MOUSE | Aspartic phosphoprotein PEA-15                                       | 0,000153 | 0,000199 | 0,000224 | 0,000218 | 0,000198493 | 3,17876E-05 | 16,014 | 0,000155 | 0,000171 | 0,000229 | 0,000213 | 0,000201  | 0,000194034 | 3,05664E-05 | 15,753 |
| P62301  | RS13_MOUSE  | 40S ribosomal protein S13                                            | 0,000254 | 0,000308 | 0,000307 | 0,000317 | 0,000296545 | 2,86566E-05 | 9,663  | 0,000259 | 0,000298 | 0,00026  | 0,000262 | 0,000271  | 0,000270103 | 1,64235E-05 | 6,080  |
| Q91W50  | CISD1_MOUSE | CBGSH iron-sulfur domain-containing protein 1                        | 0,0002   | 0,000226 | 0,000234 | 0,000227 | 0,000221725 | 1,4704E-05  | 6,632  | 0,000194 | 0,000249 | 0,000295 | 0,00027  | 0,000257  | 0,000253111 | 3,71693E-05 | 14,685 |
| Q5M8N0  | CNRP1_MOUSE | CBI cannabinoid receptor-interacting protein 1                       | 0,000105 | 0,000115 | 0,000143 | 0,000122 | 0,000121144 | 1,57716E-05 | 13,019 | 0,000113 | 0,000112 | 0,000127 | 0,000113 | 0,000128  | 0,000122087 | 8,76709E-06 | 7,181  |
| Q9D5T0  | ATAD1_MOUSE | ATPase family AAA domain-containing protein 1                        | 3,59E-05 | 4,17E-05 | 3,15E-05 | 3,99E-05 | 3,72781E-05 |             |        |          |          |          |          |           |             |             |        |

|        |             |                                                                       |          |          |          |          |             |             |        |          |          |          |          |          |             |             |        |
|--------|-------------|-----------------------------------------------------------------------|----------|----------|----------|----------|-------------|-------------|--------|----------|----------|----------|----------|----------|-------------|-------------|--------|
| P62743 | AP2S1_MOUSE | AP-2 complex subunit sigma                                            | 0,000174 | 0,000212 | 0,000251 | 0,000207 | 0,000210794 | 3,1741E-05  | 15,058 | 0,000191 | 0,000217 | 0,000237 | 0,000237 | 0,000193 | 0,000215046 | 2,24241E-05 | 10,428 |
| P17809 | GTR1_MOUSE  | Solute carrier family 2, facilitated glucose transporter member 1     | 0,000212 | 0,000194 | 0,000174 | 0,000177 | 0,000189301 | 1,72331E-05 | 9,104  | 0,000198 | 0,000204 | 0,000183 | 0,000188 | 0,000179 | 0,000190365 | 1,05051E-05 | 5,518  |
| P70349 | HINT1_MOUSE | Histidine triad nucleotide-binding protein 1                          | 6,91E-05 | 0,000106 | 0,00026  | 0,000115 | 0,000137404 | 8,41377E-05 | 61,234 | 6,79E-05 | 6,55E-05 | 8,98E-05 | 7,19E-05 | 7,82E-05 | 7,46548E-05 | 9,71393E-06 | 13,012 |
| Q4VAE3 | TMM65_MOUSE | Transmembrane protein 65                                              | 0,000169 | 0,000178 | 0,00018  | 0,00015  | 0,000169198 | 1,3685E-05  | 8,088  | 0,000141 | 0,00014  | 0,00014  | 0,000132 | 7,8E-05  | 0,000126208 | 2,72122E-05 | 21,561 |
| P08228 | SODC_MOUSE  | Superoxide dismutase [Cu-Zn]                                          | 0,000058 | 0,000061 | 0,000016 | 0,000066 | 0,000740405 | 0,000174782 | 23,606 | 0,000473 | 0,000477 | 0,000582 | 0,000491 | 0,000492 | 0,000503075 | 4,51431E-05 | 8,973  |
| Q61735 | CD47_MOUSE  | Leukocyte surface antigen CD47                                        | 0,000278 | 0,000177 | 0,00019  | 0,000173 | 0,000204332 | 4,95603E-05 | 24,255 | 0,000224 | 0,000258 | 0,000222 | 0,000246 | 0,000243 | 0,000238711 | 1,52506E-05 | 6,389  |
| P63011 | RAB3A_MOUSE | Ras-related protein Rab-3A                                            | 0,001049 | 0,000957 | 0,000995 | 0,001072 | 0,001017932 | 5,19926E-05 | 5,108  | 0,001104 | 0,001112 | 0,00083  | 0,001044 | 0,00105  | 0,001028022 | 0,000114847 | 11,172 |
| P62774 | MTPN_MOUSE  | Myotrophin                                                            | 6,7E-05  | 8,58E-05 | 0,000106 | 8,71E-05 | 8,64272E-05 | 1,58572E-05 | 18,347 | 6,52E-05 | 7,22E-05 | 7,26E-05 | 7,43E-05 | 8,39E-05 | 7,36279E-05 | 6,73283E-06 | 9,144  |
| Q60692 | PSB6_MOUSE  | Proteasome subunit beta type-6                                        | 7,31E-05 | 7,2E-05  | 7,69E-05 | 7,48E-05 | 7,4177E-05  | 2,13829E-06 | 2,883  | 7,36E-05 | 7,89E-05 | 8,02E-05 | 6,92E-05 | 6,01E-05 | 7,24111E-05 | 8,15327E-06 | 11,260 |
| Q61234 | SNTA1_MOUSE | Alpha-1-syntrophin                                                    | 3,16E-05 | 3,11E-05 | 3,17E-05 | 3,4E-05  | 3,21153E-05 | 1,32025E-06 | 4,111  | 3,2E-05  | 2,97E-05 | 2,98E-05 | 3,01E-05 | 2,76E-05 | 2,98414E-05 | 1,54317E-06 | 5,171  |
| P63163 | RSMN_MOUSE  | Small nuclear ribonucleoprotein-associated protein N                  | 5,52E-05 | 6,14E-05 | 6,46E-05 | 6,71E-05 | 6,20663E-05 | 5,17066E-06 | 8,331  | 5,66E-05 | 5,18E-05 | 6,04E-05 | 5,56E-05 | 5,27E-05 | 5,544E-05   | 3,43043E-06 | 6,188  |
| Q9D3D9 | ATPD_MOUSE  | ATP synthase subunit delta, mitochondrial                             | 0,000359 | 0,000354 | 0,000353 | 0,000362 | 0,000356887 | 4,44694E-06 | 1,246  | 0,000295 | 0,000382 | 0,000409 | 0,000305 | 0,0003   | 0,000338374 | 5,32871E-05 | 15,748 |
| Q9CQR4 | ACO13_MOUSE | Acyl-coenzyme A thioesterase 13                                       | 0,000102 | 0,000124 | 0,000114 | 0,000115 | 0,000113529 | 9,09321E-06 | 8,010  | 0,000102 | 0,000118 | 0,000124 | 0,000112 | 0,000101 | 0,000114111 | 1,01559E-05 | 9,116  |
| Q62425 | NDUA4_MOUSE | Cytochrome c oxidase subunit NDUA4                                    | 0,000552 | 0,000604 | 0,000616 | 0,000562 | 0,000583321 | 3,12219E-05 | 5,352  | 0,000515 | 0,000536 | 0,000551 | 0,000568 | 0,000504 | 0,000534778 | 2,61965E-05 | 4,899  |
| Q901G1 | RAB18_MOUSE | Ras-related protein Rab-18                                            | 0,000189 | 0,000229 | 0,000223 | 0,000206 | 0,00021867  | 1,81031E-05 | 8,545  | 0,000223 | 0,000215 | 0,000189 | 0,000214 | 0,000216 | 0,000211509 | 1,3077E-05  | 6,183  |
| P26369 | U2AF2_MOUSE | Splicing factor U2AF 65 kDa subunit                                   | 3,5E-05  | 3,68E-05 | 4,33E-05 | 3,79E-05 | 3,82355E-05 | 3,56477E-06 | 9,323  | 2,32E-05 | 2,29E-05 | 2,9E-05  | 3,08E-05 | 2,77E-05 | 2,67312E-05 | 3,52529E-06 | 13,188 |
| Q9CRB8 | MTFP1_MOUSE | Mitochondrial fission process protein 1                               | 5,06E-05 | 6,16E-05 | 4,38E-05 | 5,27E-05 | 5,22069E-05 | 7,3222E-06  | 14,025 | 4,74E-05 | 4,79E-05 | 4,31E-05 | 4,62E-05 | 3,41E-05 | 4,37408E-05 | 5,71228E-06 | 13,059 |
| P10639 | THIO_MOUSE  | Thioiodoxin                                                           | 0,000136 | 0,000153 | 0,000172 | 0,000145 | 0,000151321 | 1,5238E-05  | 10,070 | 0,00012  | 0,000134 | 0,000124 | 0,000123 | 0,000107 | 0,00012147  | 9,8682E-06  | 8,124  |
| Q8C0P5 | COR2A_MOUSE | Coronin-2A                                                            | 4,85E-05 | 3,06E-05 | 2,94E-05 | 3,23E-05 | 3,52051E-05 | 8,95368E-06 | 25,433 | 3,37E-05 | 2,92E-05 | 2,71E-05 | 3,21E-05 | 2,6E-05  | 2,95966E-05 | 3,27149E-06 | 11,054 |
| Q9CQX2 | CYB5B_MOUSE | Cytochrome b5 type B                                                  | 0,000176 | 0,000194 | 0,000186 | 0,000169 | 0,00018121  | 1,08241E-05 | 5,973  | 0,000149 | 0,000161 | 0,000166 | 0,000148 | 0,000157 | 0,000156342 | 7,58107E-06 | 4,849  |
| Q91Z23 | SYUB_MOUSE  | Beta-synuclein                                                        | 0,000677 | 0,000716 | 0,000759 | 0,000728 | 0,000719918 | 3,41708E-05 | 4,746  | 0,000615 | 0,000695 | 0,000648 | 0,000659 | 0,000616 | 0,000632949 | 4,04078E-05 | 6,384  |
| P63082 | VATL_MOUSE  | V-type proton ATPase 16 kDa proteolipid subunit                       | 4,03E-05 | 3,68E-05 | 7,27E-05 | 4,72E-05 | 4,92354E-05 | 1,62299E-05 | 32,964 | 6,81E-05 | 8,54E-05 | 9,74E-05 | 9,93E-05 | 0,000103 | 9,06988E-05 | 1,42877E-05 | 15,753 |
| Q8BJH1 | ZC21A_MOUSE | Zinc finger C2HC domain-containing protein 1A                         | 7E-06    | 7,89E-06 | 8,65E-06 | 7,27E-06 | 7,70077E-06 | 7,33553E-07 | 9,526  | 8,48E-06 | 8,73E-06 | 8,89E-06 | 8,55E-06 | 9,43E-06 | 8,81672E-06 | 3,75241E-07 | 4,256  |
| Q60771 | CLD11_MOUSE | Claudin-11                                                            | 4,88E-05 | 5,51E-05 | 4,48E-05 | 4,26E-05 | 4,47830E-05 | 5,49862E-06 | 11,496 | 5,85E-05 | 7,32E-05 | 7,58E-05 | 5,51E-05 | 5,32E-05 | 6,3166E-05  | 1,05861E-05 | 16,759 |
| O35857 | TIM44_MOUSE | Mitochondrial import inner membrane translocase subunit TIM44         | 2,75E-05 | 2,37E-05 | 2,98E-05 | 2,48E-05 | 2,64321E-05 | 2,76765E-06 | 10,471 | 2,13E-05 | 2,13E-05 | 2,11E-05 | 1,97E-05 | 1,61E-05 | 1,98706E-05 | 2,22119E-06 | 11,178 |
| E9PUL5 | PRRT2_MOUSE | Proline-rich transmembrane protein 2                                  | 6,34E-05 | 5,46E-05 | 4,37E-05 | 4,74E-05 | 5,22565E-05 | 8,6652E-06  | 16,582 | 5,85E-05 | 5,33E-05 | 4,7E-05  | 4,57E-05 | 4,29E-05 | 4,94949E-05 | 6,31041E-06 | 12,750 |
| P10922 | H10_MOUSE   | Histone H1.0                                                          | 0,000203 | 0,000208 | 0,000245 | 0,000284 | 0,000252951 | 3,77497E-05 | 14,924 | 0,00021  | 0,000255 | 0,000303 | 0,00033  | 0,000283 | 0,000276209 | 4,60592E-05 | 16,675 |
| Q8VDP6 | CDIPT_MOUSE | CDP-diacylglycerol--inositol 3-phosphatidyltransferase                | 6,5E-05  | 6,67E-05 | 8,07E-05 | 6,65E-05 | 6,97528E-05 | 7,35045E-06 | 10,538 | 7,74E-05 | 7,88E-05 | 8,18E-05 | 8,68E-05 | 7,92E-05 | 8,08141E-05 | 3,71216E-06 | 4,593  |
| P26883 | FKB1A_MOUSE | Peptidyl-prolyl cis-trans isomerase FKBP1A                            | 0,000187 | 0,000297 | 0,000492 | 0,000325 | 0,000325108 | 0,000126108 | 38,760 | 0,000203 | 0,000222 | 0,000305 | 0,000266 | 0,000318 | 0,000262908 | 5,0318E-05  | 19,139 |
| P03888 | NU1M_MOUSE  | NADH-ubiquinone oxidoreductase chain 1                                | 9,29E-05 | 7,66E-05 | 7,29E-05 | 6,48E-05 | 6,76963E-05 | 1,18213E-05 | 15,393 | 7,14E-05 | 6,54E-05 | 5,58E-05 | 5,7E-05  | 6,22E-05 | 6,23518E-05 | 6,36517E-06 | 10,208 |
| O08919 | NUMBL_MOUSE | Numb-like protein                                                     | 3,81E-05 | 4,82E-05 | 5,39E-05 | 5,25E-05 | 4,81555E-05 | 7,13126E-06 | 14,809 | 4,98E-05 | 4,41E-05 | 4,96E-05 | 4,51E-05 | 5,36E-05 | 4,8451E-05  | 3,87419E-06 | 7,996  |
| Q8WD33 | SGTB_MOUSE  | Small glutamine-rich tetratricopeptide repeat-containing protein beta | 3,46E-05 | 3,31E-05 | 2,97E-05 | 3,06E-05 | 3,19962E-05 | 2,27693E-06 | 7,116  | 3,43E-05 | 3,1E-05  | 3,06E-05 | 3,38E-05 | 2,82E-05 | 3,15638E-05 | 2,50947E-06 | 7,950  |
| Q9CPU4 | MGST3_MOUSE | Microsomal glutathione S-transferase 3                                | 0,000287 | 0,000262 | 0,000306 | 0,000236 | 0,000272671 | 3,02912E-05 | 11,109 | 0,000263 | 0,00022  | 0,000236 | 0,000243 | 0,000227 | 0,000237954 | 1,66596E-05 | 7,001  |
| P03930 | ATP8_MOUSE  | ATP synthase subunit 8                                                | 5,36E-05 | 7,56E-05 | 8,87E-05 | 6,68E-05 | 7,11801E-05 | 1,47356E-05 | 20,702 | 5,82E-05 | 5,6E-05  | 6,82E-05 | 7,08E-05 | 5,62E-05 | 6,18891E-05 | 7,08671E-06 | 11,451 |
| Q80W17 | LYRIC_MOUSE | Protein LYRIC                                                         | 5,55E-05 | 6,99E-05 | 5,88E-05 | 6,68E-05 | 6,27365E-05 | 6,71929E-06 | 10,710 | 5,18E-05 | 4,79E-05 | 5,37E-05 | 4,81E-05 | 5,8E-05  | 5,19067E-05 | 4,22093E-06 | 8,132  |
| P62320 | SMD3_MOUSE  | Small nuclear ribonucleoprotein Sm D3                                 | 7,89E-05 | 0,000111 | 0,000109 | 9,53E-05 | 9,84301E-05 | 1,47047E-05 | 14,939 | 9,19E-05 | 8,43E-05 | 0,000112 | 0,000115 | 0,0001   | 0,000100738 | 1,30505E-05 | 12,955 |
| Q99J16 | RAP1B_MOUSE | Ras-related protein Rap-1b                                            | 5,82E-05 | 6,15E-05 | 6,07E-05 | 6,91E-05 | 6,23878E-05 | 4,70475E-06 | 7,541  | 6,47E-05 | 7,22E-05 | 8,59E-05 | 9,06E-05 | 7,61E-05 | 7,78826E-05 | 1,04191E-05 | 13,378 |
| Q62442 | VAMP1_MOUSE | Vesicle-associated membrane protein 1                                 | 0,000137 | 0,000209 | 0,000176 | 0,000169 | 0,000172988 | 2,94999E-05 | 17,053 | 0,000162 | 0,000172 | 0,000188 | 0,000157 | 0,000137 | 0,000163035 | 1,907E-05   | 11,697 |
| Q92216 | TSN2_MOUSE  | Transpanin-2                                                          | 4,28E-05 | 3,92E-05 | 3,16E-05 | 4,48E-05 | 3,9593E-05  | 5,52957E-06 | 14,724 | 4,08E-05 | 6,08E-05 | 5,23E-05 | 4,28E-05 | 3,6E-05  | 4,6557E-05  | 9,93375E-06 | 21,337 |
| Q6PFR5 | TRA2A_MOUSE | Transformer-2 protein homolog alpha                                   | 3,35E-05 | 3,31E-05 | 3,85E-05 | 3,63E-05 | 3,53669E-05 | 2,52849E-06 | 7,149  | 3,21E-05 | 1,71E-05 | 3,42E-05 | 3,71E-05 | 3,02E-05 | 3,01353E-05 | 7,70105E-06 | 25,555 |
| P62838 | UB2D2_MOUSE | Ubiquitin-conjugating enzyme E2 D2                                    | 0,000144 | 0,000178 | 0,000178 | 0,000148 | 0,000162066 | 1,82557E-05 | 11,264 | 0,000137 | 0,000144 | 0,000149 | 0,00014  | 0,000132 | 0,000140547 | 6,3535E-06  | 4,521  |
| P0DN34 | NDUB1_MOUSE | NADH dehydrogenase [ubiquinone] 1 beta subcomplex subunit 1           | 5,53E-05 | 5,23E-05 | 6,04E-05 | 5,74E-05 | 5,63543E-05 | 3,42058E-06 | 6,070  | 4,4E-05  | 4,63E-05 | 4,75E-05 | 4,18E-05 | 4,04E-05 | 4,39976E-05 | 2,95122E-06 | 6,708  |
| Q9R1O9 | VAS1_MOUSE  | V-type proton ATPase subunit S1                                       | 0,00026  | 0,000244 | 0,000279 | 0,00027  | 0,000263277 | 1,50163E-05 | 5,704  | 0,000222 | 0,000219 | 0,000268 | 0,000289 | 0,000241 | 0,000247771 | 2,9985E-05  | 12,102 |
| O55100 | SNG1_MOUSE  | Synaptogyrin-1                                                        | 0,000654 | 0,000602 | 0,000681 | 0,000643 | 0,000645005 | 3,28246E-05 | 5,089  | 0,000708 | 0,000619 | 0,000588 | 0,000601 | 0,000627 | 0,000628472 | 4,68594E-05 | 7,456  |
| Q9CR26 | VTA1_MOUSE  | Vacuolar protein sorting-associated protein VTA1 homolog              | 3,59E-05 | 3,59E-05 | 3,4E-05  | 3,33E-05 | 3,47731E-05 | 1,34621E-06 | 3,871  | 4,15E-05 | 3,32E-05 | 3,86E-05 | 3,71E-05 | 3,77E-05 | 3,76188E-05 | 3,01044E-06 | 8,003  |
| P56135 | ATPK_MOUSE  | ATP synthase subunit f, mitochondrial                                 | 0,000486 | 0,000542 | 0,000702 | 0,000522 | 0,000562705 | 9,54293E-05 | 16,959 | 0,000444 | 0,000525 | 0,000579 | 0,000504 | 0,000556 | 0,000528687 | 5,1145E-05  | 9,674  |
| Q61990 | PCBP2_MOUSE | Poly(rC)-binding protein 2                                            | 0,000214 | 0,000225 | 0,000227 | 0,000228 | 0,000223563 | 6,51337E-06 | 2,913  | 0,000196 | 0,000195 | 0,000205 | 0,000182 | 0,000174 | 0,000191149 | 1,11686E-05 | 5,843  |
| P48771 | CK7A2_MOUSE | Cytochrome c oxidase subunit 7A2, mitochondrial                       | 0,000138 | 0,000151 | 0,00016  | 0,00013  | 0,000144743 | 1,33435E-05 | 9,219  | 0,000125 | 0,000146 | 0,000156 | 0,00017  | 0,00018  | 0,000147367 | 1,67134E-05 | 11,341 |
| P43274 | H14_MOUSE   | Histone H1.4                                                          | 0,000151 | 0,000171 | 0,000162 | 0,000165 | 0,000162092 | 8,02401E-06 | 4,950  | 0,000139 | 0,000136 | 0,000176 | 0,000152 | 0,000174 | 0,000155307 | 1,86578E-05 | 12,013 |
| P43275 | H11_MOUSE   | Histone H1.1                                                          | 0,000211 | 0,000263 | 0,000261 | 0,000291 | 0,000256332 | 3,30214E-05 | 12,882 | 0,000224 | 0,000234 | 0,000311 | 0,000253 | 0,000266 | 0,000257575 | 3,39412E-05 | 13,177 |
| Q9ER58 | TICN2_MOUSE | Ticatan-2                                                             | 2,08E-05 | 2,04E-05 | 1,73E-05 | 2,1E-05  | 1,98726E-05 | 1,73096E-06 | 8,710  | 1,88E-05 | 1,3E-05  | 1,88E-05 | 1,72E-05 | 1,77E-05 | 1,71054E-05 | 2,40827E-06 | 14,079 |
| Q80X50 | UBP2L_MOUSE | Ubiquitin-associated protein 2-like                                   | 2,17E-05 | 2,32E-05 | 2,07E-05 | 2,26E-05 | 2,20675E-05 | 1,09733E-06 | 4,973  | 2,41E-05 | 1,72E-05 | 1,86E-05 |          |          |             |             |        |

|         |             |                                                                           |          |          |          |          |             |              |        |          |          |          |          |          |             |             |        |
|---------|-------------|---------------------------------------------------------------------------|----------|----------|----------|----------|-------------|--------------|--------|----------|----------|----------|----------|----------|-------------|-------------|--------|
| P06801  | MAOX_MOUSE  | NADP-dependent malic enzyme                                               | 0,000136 | 0,00014  | 0,000122 | 0,000135 | 0,000133398 | 7,78884E-06  | 5,839  | 0,000138 | 0,000133 | 0,000149 | 0,000144 | 0,000135 | 0,000140011 | 6,77314E-06 | 4,838  |
| O88544  | CSN4_MOUSE  | COP9 signalosome complex subunit 4                                        | 0,000244 | 0,000285 | 0,000248 | 0,00026  | 0,000259242 | 1,85066E-05  | 7,139  | 0,000217 | 0,000249 | 0,000253 | 0,000268 | 0,000265 | 0,000250537 | 2,03152E-05 | 8,109  |
| P16460  | ASSY_MOUSE  | Argininosuccinate synthase                                                | 0,000158 | 0,000164 | 0,000177 | 0,000165 | 0,000166014 | 7,74062E-06  | 4,663  | 0,000146 | 0,000161 | 0,000194 | 0,000172 | 0,000173 | 0,000169371 | 1,74614E-05 | 10,310 |
| Q88UUV3 | GEPH_MOUSE  | Gephyrin                                                                  | 2,71E-05 | 2,82E-05 | 2,67E-05 | 2,74E-05 | 2,73681E-05 | 6,08401E-07  | 2,223  | 2,91E-05 | 2,61E-05 | 2,89E-05 | 2,86E-05 | 2,75E-05 | 2,80491E-05 | 1,25327E-06 | 4,469  |
| P61027  | RAB10_MOUSE | Ras-related protein Rab-10                                                | 0,000145 | 0,000184 | 0,000276 | 0,000164 | 0,000192145 | 5,82158E-05  | 30,298 | 0,000161 | 0,00015  | 0,000195 | 0,000217 | 0,000164 | 0,000177425 | 2,77221E-05 | 15,625 |
| Q88G32  | PSD11_MOUSE | 265 proteasome non-ATPase regulatory subunit 11                           | 0,000155 | 0,000164 | 0,000172 | 0,000162 | 0,000163316 | 6,94269E-06  | 4,251  | 0,000174 | 0,00015  | 0,000165 | 0,000182 | 0,000161 | 0,00016638  | 1,24666E-05 | 7,492  |
| Q9CR68  | UCR1_MOUSE  | Cytochrome b-c1 complex subunit Rieske, mitochondrial                     | 2,35E-05 | 2,13E-05 | 1,45E-05 | 2,13E-05 | 2,01751E-05 | 3,90083E-06  | 19,335 | 1,81E-05 | 3E-05    | 1,91E-05 | 1,97E-05 | 1,54E-05 | 2,04639E-05 | 5,60184E-06 | 27,374 |
| P24549  | AL1A1_MOUSE | Retinal dehydrogenase 1                                                   | 0,000211 | 0,000158 | 0,000164 | 0,000193 | 0,000181226 | 2,49332E-05  | 13,758 | 0,000186 | 0,000142 | 0,000179 | 0,000211 | 0,000207 | 0,000184682 | 2,74404E-05 | 14,858 |
| O88485  | DC111_MOUSE | Cytoplasmic dynein 1 intermediate chain 1                                 | 0,000246 | 0,000286 | 0,000266 | 0,000253 | 0,000262982 | 1,77957E-05  | 6,767  | 0,000281 | 0,00024  | 0,000273 | 0,000258 | 0,000269 | 0,000264366 | 1,59014E-05 | 6,015  |
| Q8IZN5  | ACAD9_MOUSE | Acyl-CoA dehydrogenase family member 9, mitochondrial                     | 7,4E-05  | 7,12E-05 | 6,25E-05 | 6,8E-05  | 6,89419E-05 | 4,91899E-06  | 7,135  | 7,58E-05 | 6,47E-05 | 6,53E-05 | 5,58E-05 | 6,88E-05 | 6,60675E-05 | 7,22213E-06 | 10,931 |
| Q61481  | PDE1A_MOUSE | Calcium/calmodulin-dependent 3',5'-cyclic nucleotide phosphodiesterase 1A | 0,00013  | 0,000134 | 0,000153 | 0,000139 | 0,000138764 | 1,00206E-05  | 7,221  | 0,000129 | 0,000108 | 0,000137 | 0,000135 | 0,000134 | 0,000128477 | 1,18615E-05 | 9,232  |
| P53994  | RAB2A_MOUSE | Ras-related protein Rab-2A                                                | 8,11E-05 | 9,55E-05 | 0,000106 | 9,2E-05  | 9,36041E-05 | 1,01873E-05  | 10,883 | 7,9E-05  | 8,81E-05 | 9,03E-05 | 0,0001   | 8,96E-05 | 8,94581E-05 | 7,55459E-06 | 8,445  |
| P12970  | RL7A_MOUSE  | 60S ribosomal protein L7a                                                 | 0,000102 | 0,000112 | 0,000122 | 0,000115 | 0,000112591 | 8,27512E-06  | 7,350  | 0,000107 | 0,000107 | 0,000106 | 9,41E-05 | 9,33E-05 | 0,000101337 | 7,00616E-06 | 6,914  |
| Q9QUP5  | HPLN1_MOUSE | Hyaluronan and proteoglycan link protein 1                                | 4,86E-05 | 6,05E-05 | 6,12E-05 | 6,08E-05 | 5,77773E-05 | 6,11182E-06  | 10,578 | 5,25E-05 | 5,17E-05 | 4,51E-05 | 4,46E-05 | 4,53E-05 | 4,78383E-05 | 3,88501E-06 | 8,121  |
| Q77TMK9 | HNRPQ_MOUSE | Heterogeneous nuclear ribonucleoprotein Q                                 | 0,000111 | 0,000113 | 9,49E-05 | 0,000119 | 0,000109479 | 1,02813E-05  | 9,391  | 0,000123 | 0,00011  | 0,000122 | 0,000112 | 0,000125 | 0,000118433 | 7,23776E-06 | 6,111  |
| Q9Z140  | CPNE6_MOUSE | Copine-6                                                                  | 0,000146 | 0,000273 | 0,000298 | 0,000332 | 0,000262037 | 8,12617E-05  | 31,011 | 0,000182 | 0,000113 | 0,000247 | 0,00022  | 0,000227 | 0,000197978 | 5,28632E-05 | 26,701 |
| O88712  | CTBP1_MOUSE | C-terminal-binding protein 1                                              | 0,00029  | 0,000298 | 0,00031  | 0,000304 | 0,00030046  | 8,48883E-06  | 2,825  | 0,000325 | 0,000277 | 0,000306 | 0,00028  | 0,000312 | 0,000300007 | 2,08057E-05 | 6,935  |
| P53026  | RL10A_MOUSE | 60S ribosomal protein L10a                                                | 4,1E-05  | 4,14E-05 | 4,56E-05 | 4,88E-05 | 4,42057E-05 | 3,70125E-06  | 8,373  | 4,55E-05 | 5,31E-05 | 5,15E-05 | 4,02E-05 | 4,15E-05 | 4,63663E-05 | 5,76443E-06 | 12,432 |
| Q9Z2W0  | DNPEP_MOUSE | Aspartyl aminopeptidase                                                   | 7,43E-05 | 6,65E-05 | 7,08E-05 | 6,82E-05 | 6,9962E-05  | 3,37905E-06  | 4,830  | 6,01E-05 | 5,44E-05 | 5,59E-05 | 6,39E-05 | 6,24E-05 | 5,93406E-05 | 4,08218E-06 | 6,879  |
| O55042  | SYUA_MOUSE  | Alpha-synuclein                                                           | 0,000141 | 0,000612 | 0,000757 | 0,000654 | 0,000540993 | 0,000273469  | 50,549 | 0,000505 | 0,000532 | 0,000554 | 0,000562 | 0,000608 | 0,00055116  | 3,95151E-05 | 7,169  |
| Q61081  | CDC37_MOUSE | Hsp90 co-chaperone Cdc37                                                  | 7,9E-05  | 9,03E-05 | 9,02E-05 | 9,13E-05 | 8,76975E-05 | 4,83326E-06  | 6,652  | 9,25E-05 | 8,75E-05 | 0,000104 | 0,0001   | 9,71E-05 | 9,62691E-05 | 6,45643E-06 | 6,707  |
| Q37C72  | FAHD2_MOUSE | Fumarylactoylacetate hydrolase domain-containing protein 2A               | 5,85E-05 | 6,09E-05 | 6,83E-05 | 6,07E-05 | 6,2097E-05  | 5,25803E-06  | 6,857  | 6,11E-05 | 6E-05    | 5,46E-05 | 5,86E-05 | 5,6E-05  | 5,80689E-05 | 2,72291E-06 | 4,689  |
| Q91VM9  | IPYR2_MOUSE | Inorganic pyrophosphatase 2, mitochondrial                                | 6,89E-05 | 6,9E-05  | 6,88E-05 | 6,99E-05 | 6,9157E-05  | 4,85806E-07  | 0,702  | 6,59E-05 | 3,88E-05 | 6,33E-05 | 5,64E-05 | 5,61E-05 | 5,60697E-05 | 1,05831E-05 | 18,875 |
| Q9QVP9  | FAK2_MOUSE  | Protein-tyrosine kinase 2-beta                                            | 2,56E-05 | 3,58E-05 | 3,47E-05 | 3,54E-05 | 3,28707E-05 | 4,89862E-06  | 14,875 | 2,43E-05 | 1,93E-05 | 2,54E-05 | 2,69E-05 | 2,72E-05 | 2,46236E-05 | 3,22082E-06 | 13,080 |
| Q9WV60  | GSK3B_MOUSE | Glycogen synthase kinase-3 beta                                           | 0,000135 | 0,000128 | 0,000147 | 0,000127 | 0,000134147 | 9,01117E-06  | 6,717  | 0,000128 | 0,000113 | 0,000145 | 0,00013  | 0,000135 | 0,000130153 | 1,17202E-05 | 9,005  |
| Q88T67  | NDRG4_MOUSE | Protein NDRG4                                                             | 3,38E-05 | 3,85E-05 | 3,7E-05  | 3,62E-05 | 3,63871E-05 | 1,98102E-06  | 5,444  | 4,28E-05 | 3,61E-05 | 4,95E-05 | 4,32E-05 | 4,61E-05 | 4,35438E-05 | 4,98218E-06 | 11,442 |
| Q88LF1  | NCEH1_MOUSE | Neutral cholesterol ester hydrolase 1                                     | 5,64E-05 | 4,54E-05 | 5,22E-05 | 4,57E-05 | 4,99501E-05 | 5,34535E-06  | 10,701 | 4,34E-05 | 4,1E-05  | 5,38E-05 | 6,15E-05 | 5,61E-05 | 5,11545E-05 | 6,86542E-06 | 16,979 |
| Q9R0X4  | ACOT9_MOUSE | Acyl-coenzyme A thioesterase 9, mitochondrial                             | 0,000137 | 0,000134 | 0,000141 | 0,000136 | 0,00013706  | 2,97293E-06  | 2,169  | 0,000132 | 0,000127 | 0,000132 | 0,000138 | 0,000124 | 0,000130697 | 5,21952E-06 | 3,994  |
| Q8R0A7  | K0513_MOUSE | Uncharacterized protein KIAA0513                                          | 2,85E-05 | 3,37E-05 | 4,17E-05 | 2,79E-05 | 3,29324E-05 | 6,37735E-06  | 19,365 | 2,71E-05 | 3,1E-05  | 3,17E-05 | 2,93E-05 | 3,07E-05 | 2,99659E-05 | 1,81712E-06 | 6,064  |
| P42208  | SEPT2_MOUSE | Septin-2                                                                  | 0,000159 | 0,000147 | 0,000148 | 0,000154 | 0,000151756 | 5,59209E-06  | 3,685  | 0,000156 | 0,000143 | 0,000164 | 0,000188 | 0,000158 | 0,000161723 | 1,62531E-05 | 10,050 |
| Q9Z218  | SUCB2_MOUSE | Succinate--CoA ligase [GDP-forming] subunit beta, mitochondrial           | 2,98E-05 | 3,49E-05 | 3,1E-05  | 2,99E-05 | 3,13952E-05 | 2,38429E-06  | 7,594  | 3,44E-05 | 2,74E-05 | 3,37E-05 | 2,75E-05 | 3,03E-05 | 3,0656E-05  | 3,31127E-06 | 10,801 |
| Q9QXV0  | PCSK1_MOUSE | ProSAA5                                                                   | 0,000109 | 0,00013  | 0,000158 | 0,000155 | 0,000137871 | 2,30986E-05  | 16,754 | 9,32E-05 | 0,000106 | 0,000143 | 0,000131 | 0,000118 | 0,00011823  | 1,95341E-05 | 16,522 |
| Q88I21  | ANS1B_MOUSE | Ankyrin repeat and sterile alpha motif domain-containing protein 1B       | 8,53E-05 | 8,7E-05  | 0,000126 | 0,000125 | 0,00010596  | 2,29089E-05  | 21,620 | 0,000107 | 6,33E-05 | 8,96E-05 | 9,58E-05 | 0,000112 | 9,34633E-05 | 1,90433E-05 | 20,375 |
| Q8K050  | PHYIP_MOUSE | Phytanoyl-CoA hydroxylase-interacting protein                             | 7,54E-05 | 9,41E-05 | 0,00011  | 9,59E-05 | 9,39056E-05 | 1,43E-05     | 15,228 | 8,79E-05 | 7,87E-05 | 8,21E-05 | 7,6E-05  | 9,39E-05 | 8,37101E-05 | 7,22354E-06 | 8,629  |
| Q35381  | AN32A_MOUSE | Acidic leucine-rich nuclear phosphoprotein 32 family member A             | 5,96E-05 | 5,43E-05 | 6,42E-05 | 5,79E-05 | 5,90286E-05 | 4,09269E-06  | 6,933  | 6,27E-05 | 6,48E-05 | 6,35E-05 | 6,51E-05 | 5,77E-05 | 6,27554E-05 | 2,97512E-06 | 4,741  |
| P19253  | RL13A_MOUSE | 60S ribosomal protein L13a                                                | 5,9E-05  | 7,27E-05 | 8,54E-05 | 8,33E-05 | 7,50834E-05 | 1,20679E-05  | 16,073 | 6,52E-05 | 7,74E-05 | 8,2E-05  | 6,98E-05 | 7,23E-05 | 7,33245E-05 | 6,55488E-06 | 8,940  |
| P61082  | UBC12_MOUSE | NEED8-conjugating enzyme Ubc12                                            | 5,01E-05 | 5,75E-05 | 5,76E-05 | 5,62E-05 | 5,53545E-05 | 3,55557E-06  | 6,423  | 4,49E-05 | 5,09E-05 | 5,59E-05 | 4,78E-05 | 4,18E-05 | 4,82557E-05 | 5,45458E-06 | 11,303 |
| Q9JKB1  | UCLH3_MOUSE | Ubiquitin carboxyl-terminal hydrolase isozyme L3                          | 3,78E-05 | 3,5E-05  | 3,67E-05 | 3,86E-05 | 3,69989E-05 | 1,54809E-06  | 4,184  | 4,15E-05 | 3,59E-05 | 4,03E-05 | 4,14E-05 | 3,89E-05 | 3,99597E-05 | 2,3051E-06  | 5,822  |
| P46471  | PRS7_MOUSE  | 265 protease regulatory subunit 7                                         | 0,000107 | 0,000114 | 0,000126 | 0,000114 | 0,000115232 | 7,9961E-06   | 6,939  | 0,000125 | 0,000106 | 0,000119 | 0,000115 | 0,000108 | 0,000114592 | 7,96142E-06 | 6,948  |
| Q8CGF6  | WDR47_MOUSE | WD repeat-containing protein 47                                           | 0,000113 | 0,000117 | 0,000119 | 0,000106 | 0,000113852 | 5,66297E-06  | 4,974  | 0,000107 | 0,000104 | 0,000115 | 0,000102 | 0,000107 | 0,000107124 | 4,78928E-06 | 4,471  |
| E9Q819  | FRY_MOUSE   | Protein furry homolog                                                     | 1,59E-05 | 1,59E-05 | 1,63E-05 | 1,54E-05 | 1,58738E-05 | 3,41931E-07  | 2,154  | 1,7E-05  | 1,38E-05 | 1,33E-05 | 1,27E-05 | 1,91E-05 | 1,51712E-05 | 2,75472E-06 | 18,158 |
| Q88LE7  | VGLU2_MOUSE | Vesicular glutamate transporter 2                                         | 8,17E-05 | 0,000117 | 9,41E-05 | 9,73E-05 | 9,75204E-05 | 1,4643E-05   | 15,015 | 0,000101 | 0,00011  | 9,85E-05 | 8,73E-05 | 9,68E-05 | 9,86609E-05 | 8,1474E-06  | 8,258  |
| P45952  | ACADM_MOUSE | Medium-chain specific acyl-CoA dehydrogenase, mitochondrial               | 9,55E-05 | 9,21E-05 | 9,77E-05 | 9,74E-05 | 9,56672E-05 | 2,57318E-06  | 2,690  | 9,34E-05 | 9,81E-05 | 9,45E-05 | 8,63E-05 | 8,94E-05 | 9,23314E-05 | 4,56363E-06 | 4,943  |
| Q88JU0  | SGTA_MOUSE  | Small glutamine-rich tetratricopeptide repeat-containing protein alpha    | 3,49E-05 | 3,56E-05 | 4,07E-05 | 3,46E-05 | 3,64645E-05 | 2,87876E-06  | 7,895  | 3,7E-05  | 3,59E-05 | 3,46E-05 | 3,4E-05  | 3,40E-05 | 3,4391E-05  | 2,49619E-06 | 7,258  |
| P52760  | UK114_MOUSE | Ribonuclease UK114                                                        | 0,000176 | 0,000203 | 0,000202 | 0,000206 | 0,000196586 | 1,39287E-05  | 7,085  | 0,000183 | 0,000264 | 0,000213 | 0,000197 | 0,000155 | 0,000202422 | 4,03554E-05 | 19,936 |
| Q9JM14  | NTSC_MOUSE  | 5'(3')-deoxyribonucleotidase, cytosolic type                              | 8,92E-05 | 9,78E-05 | 0,000115 | 0,000127 | 0,000107252 | 1,68809E-05  | 15,739 | 9,72E-05 | 9,44E-05 | 0,000101 | 9,62E-05 | 9,62E-05 | 9,7047E-05  | 2,5384E-06  | 2,616  |
| Q88F29  | ERLN2_MOUSE | Erlin-2                                                                   | 5,86E-05 | 6,22E-05 | 5,97E-05 | 6,08E-05 | 6,03366E-05 | 1,525137E-06 | 2,571  | 5,66E-05 | 5,78E-05 | 6,08E-05 | 5,52E-05 | 6,25E-05 | 5,85876E-05 | 3,02423E-06 | 5,162  |
| O54865  | GCYB1_MOUSE | Guanylate cyclase soluble subunit beta-1                                  | 0,000137 | 0,000166 | 0,000168 | 0,000118 | 0,00014712  | 2,42106E-05  | 16,576 | 0,000106 | 0,000108 | 0,000142 | 0,000141 | 0,000108 | 0,000146398 | 2,65776E-05 | 18,154 |
| Q88L97  | SRSF7_MOUSE | Serine/arginine-rich splicing factor 7                                    | 4,89E-05 | 6,04E-05 | 6,32E-05 | 6,48E-05 | 5,93166E-05 | 7,16032E-06  | 12,071 | 5,53E-05 | 5,35E-05 | 5,74E-05 | 5,45E-05 | 6,18E-05 | 5,64872E-05 | 3,26634E-06 | 5,782  |
| Q88P67  | RL24_MOUSE  | 60S ribosomal protein L24                                                 | 5,19E-05 | 7,67E-05 | 8,04E-05 | 8,28E-05 | 7,29635E-05 | 1,42803E-05  | 19,572 | 7,86E-05 | 7,82E-05 | 9,78E-05 | 9,39E-05 | 9,63E-05 | 8,89721E-05 | 9,74326E-06 | 10,951 |
| Q9DCH4  | EIF3F_MOUSE | Eukaryotic translation initiation factor 3 subunit F                      | 3,84E-05 | 4,09E-05 | 4,46E-05 | 4,14E-05 | 4,13131E-05 | 2,54888E-06  | 6,170  | 4,14E-05 | 3,48E-05 | 3,81E-05 | 3,91E-05 | 4,15E-05 | 3,90026E-05 | 2,75099E-06 | 7,053  |
| P97765  | WBP2_MOUSE  | WW domain-binding protein 2                                               | 2,5E-05  | 2,72E-05 | 2,87E-05 | 3,08E-05 | 2,79373E-05 | 2,441E-      |        |          |          |          |          |          |             |             |        |

|        |             |                                                                            |          |          |          |          |             |             |        |          |          |          |          |             |             |             |        |
|--------|-------------|----------------------------------------------------------------------------|----------|----------|----------|----------|-------------|-------------|--------|----------|----------|----------|----------|-------------|-------------|-------------|--------|
| P13707 | GPDA_MOUSE  | Glycerol-3-phosphate dehydrogenase [NAD(+)], cytoplasmic                   | 0,000166 | 0,000156 | 0,000121 | 0,000165 | 0,000152039 | 2,107E-05   | 13,858 | 0,000167 | 0,000126 | 0,000179 | 0,000187 | 0,000144    | 0,000160627 | 2,53028E-05 | 15,753 |
| Q99J14 | PSMD6_MOUSE | 26S proteasome non-ATPase regulatory subunit 6                             | 5,47E-05 | 6,61E-05 | 6,87E-05 | 6,34E-05 | 6,32384E-05 | 6,05534E-06 | 9,575  | 6,1E-05  | 5,73E-05 | 5,71E-05 | 5,43E-05 | 6,03E-05    | 5,80114E-05 | 2,71459E-06 | 4,679  |
| Q99LF4 | RTCB_MOUSE  | tRNA-splicing ligase RtcB homolog                                          | 4,87E-05 | 4,95E-05 | 4,96E-05 | 5,31E-05 | 5,02317E-05 | 1,95424E-06 | 3,890  | 4,9E-05  | 4,81E-05 | 5,28E-05 | 5,46E-05 | 5,42E-05    | 5,17403E-05 | 3,02129E-06 | 5,839  |
| Q80X14 | PI42B_MOUSE | Phosphatidylinositol 5-phosphate 4-kinase type-2 beta                      | 9,75E-05 | 0,000115 | 0,000118 | 0,000112 | 0,0001106   | 9,08067E-06 | 8,210  | 0,00012  | 0,000102 | 0,000125 | 0,000133 | 0,000115    | 0,00011899  | 1,16698E-05 | 9,807  |
| Q9D8W5 | PSD12_MOUSE | 26S proteasome non-ATPase regulatory subunit 12                            | 4,4E-05  | 3,94E-05 | 5,17E-05 | 4,5E-05  | 4,5021E-05  | 5,10127E-06 | 11,331 | 4,43E-05 | 4,49E-05 | 5,08E-05 | 5,13E-05 | 4,94E-05    | 4,81566E-05 | 3,31142E-06 | 6,876  |
| O55029 | COPB2_MOUSE | Coatomer subunit beta'                                                     | 2,94E-05 | 2,98E-05 | 2,64E-05 | 2,44E-05 | 2,75103E-05 | 2,55747E-06 | 9,296  | 2,24E-05 | 2,36E-05 | 2,33E-05 | 2,23E-05 | 2,22E-05    | 2,27651E-05 | 6,38288E-07 | 2,804  |
| Q9QY81 | CLIC4_MOUSE | Chloride intracellular channel protein 4                                   | 0,000164 | 0,000141 | 0,000125 | 0,00014  | 0,0001425   | 1,59181E-05 | 11,171 | 0,000142 | 0,000157 | 0,000142 | 0,000133 | 0,000105    | 0,000135668 | 1,93683E-05 | 14,276 |
| P51660 | DHB4_MOUSE  | Peroxisomal multifunctional enzyme type 2                                  | 9,51E-05 | 9,45E-05 | 9,42E-05 | 0,000103 | 9,87855E-05 | 4,38161E-06 | 4,527  | 9,48E-05 | 9,77E-05 | 0,000103 | 9,14E-05 | 8,84E-05    | 9,49807E-05 | 5,53931E-06 | 5,832  |
| Q8R574 | KPRB_MOUSE  | Phosphoribosyl pyrophosphate synthase-associated protein 2                 | 6,47E-05 | 7,46E-05 | 7,06E-05 | 7,78E-05 | 7,19362E-05 | 5,64114E-06 | 7,842  | 5,98E-05 | 5,67E-05 | 5,5E-05  | 6,38E-05 | 6,62E-05    | 6,03086E-05 | 4,68976E-06 | 7,776  |
| P50580 | PA2G4_MOUSE | Proliferation-associated protein 2G4                                       | 5,78E-05 | 6,17E-05 | 6,95E-05 | 6,63E-05 | 6,38102E-05 | 5,15647E-06 | 8,081  | 6,22E-05 | 6,17E-05 | 6,9E-05  | 7,06E-05 | 6E-05       | 6,47131E-05 | 4,76112E-06 | 7,357  |
| Q8R570 | SNP47_MOUSE | Synaptosomal-associated protein 47                                         | 9,61E-05 | 0,000105 | 8,74E-05 | 9,12E-05 | 9,49874E-05 | 7,66045E-06 | 8,065  | 0,000107 | 9,29E-05 | 0,0001   | 9,44E-05 | 9,87E-05    | 9,8754E-05  | 5,67951E-06 | 5,751  |
| O08547 | SC22B_MOUSE | Vesicle-trafficking protein SC22b                                          | 0,000106 | 0,000109 | 0,000109 | 0,000111 | 0,000108727 | 2,04883E-06 | 1,884  | 0,000115 | 0,000117 | 0,000152 | 0,00014  | 0,000128    | 0,000130329 | 1,55368E-05 | 11,921 |
| Q91YR1 | TWF1_MOUSE  | Twinfilin-1                                                                | 2,14E-05 | 2,33E-05 | 2,01E-05 | 2,47E-05 | 2,23684E-05 | 2,04074E-06 | 9,123  | 2,39E-05 | 2,09E-05 | 2,06E-05 | 1,74E-05 | 1,83E-05    | 2,02151E-05 | 2,51679E-06 | 12,450 |
| Q99LD4 | CSN1_MOUSE  | COP9 signalosome complex subunit 1                                         | 7,36E-05 | 7,65E-05 | 7,28E-05 | 7,25E-05 | 7,38527E-05 | 4,94939E-06 | 2,498  | 8,78E-05 | 7,99E-05 | 7,48E-05 | 8,3E-05  | 8,67E-05    | 8,24125E-05 | 5,29531E-06 | 6,425  |
| Q8BWR2 | PITH1_MOUSE | PITH domain-containing protein 1                                           | 5,87E-05 | 6,64E-05 | 5,78E-05 | 7,75E-05 | 6,51034E-05 | 9,00015E-06 | 13,963 | 5,2E-05  | 5,82E-05 | 6,64E-05 | 5,21E-05 | 4,78E-05    | 5,5322E-05  | 7,24235E-06 | 13,091 |
| Q99L13 | 3HIDH_MOUSE | 3-hydroxyisobutyrate dehydrogenase, mitochondrial                          | 0,000237 | 0,000232 | 0,000201 | 0,000214 | 0,000221031 | 1,67466E-05 | 7,577  | 0,000229 | 0,000209 | 0,000234 | 0,000209 | 0,000197    | 0,00021548  | 1,56548E-05 | 7,265  |
| P32067 | LA_MOUSE    | Lupus La protein homolog                                                   | 4,82E-05 | 5,45E-05 | 6,19E-05 | 5,42E-05 | 5,47155E-05 | 5,58404E-06 | 10,206 | 4,22E-05 | 3,57E-05 | 5E-05    | 5,04E-05 | 4,53E-05    | 4,47145E-05 | 6,08981E-06 | 13,619 |
| Q7M6Y3 | PICAL_MOUSE | Phosphatidylinositol-binding clathrin assembly protein                     | 2,6E-05  | 4,23E-06 | 2,66E-05 | 2,67E-05 | 2,08746E-05 | 1,11015E-05 | 53,182 | 2,49E-05 | 2,57E-05 | 2,79E-05 | 2,18E-05 | 2,53051E-05 | 2,26483E-06 | 8,950       |        |
| Q9VV8E | PACN2_MOUSE | Protein kinase C and casein kinase substrate in neurons protein 2          | 3,43E-05 | 4,67E-05 | 4,07E-05 | 3,92E-05 | 4,02307E-05 | 5,11804E-06 | 12,722 | 4,6E-05  | 3,7E-05  | 5,42E-05 | 5,55E-05 | 3,98E-05    | 4,65061E-05 | 8,31199E-06 | 17,873 |
| O35668 | HAP1_MOUSE  | Huntingtin-associated protein 1                                            | 2,48E-05 | 7,22E-05 | 5,81E-05 | 6,95E-05 | 5,61286E-05 | 2,17714E-05 | 38,788 | 5,08E-05 | 5,91E-05 | 7,69E-05 | 7,25E-05 | 6,91E-05    | 6,56729E-05 | 1,06017E-06 | 16,143 |
| Q8C163 | EXOG_MOUSE  | Nuclease EXOG, mitochondrial                                               | 2,6E-05  | 2,48E-05 | 2,76E-05 | 2,92E-05 | 2,69135E-05 | 1,92902E-06 | 7,167  | 2,76E-05 | 2,68E-05 | 2,79E-05 | 3,46E-05 | 2,56E-05    | 2,8484E-05  | 3,5192E-06  | 12,355 |
| P62192 | PRS4_MOUSE  | 26S protease regulatory subunit 4                                          | 9,21E-05 | 0,000119 | 0,000117 | 0,0001   | 0,000107067 | 1,31677E-05 | 12,299 | 0,000111 | 0,000102 | 0,000118 | 8,93E-05 | 0,000113    | 0,000106634 | 1,13818E-05 | 10,674 |
| Q9DCM0 | ETHE1_MOUSE | Persulfide dioxygenase ETHE1, mitochondrial                                | 1,41E-05 | 1,04E-06 | 1,54E-05 | 1,36E-05 | 1,10342E-05 | 6,70455E-06 | 60,761 | 1,3E-05  | 1,46E-05 | 1,59E-05 | 1,28E-05 | 1,23E-05    | 1,37219E-05 | 1,51901E-06 | 11,070 |
| Q9CX86 | ROA0_MOUSE  | Heterogeneous nuclear ribonucleoprotein A0                                 | 7,1E-05  | 0,000131 | 0,000132 | 0,000136 | 0,000117439 | 3,10031E-05 | 26,399 | 7,2E-05  | 0,000117 | 0,000125 | 0,000114 | 0,000113    | 0,000108145 | 2,07363E-05 | 19,175 |
| P70670 | NACAM_MOUSE | Nascent polypeptide-associated complex subunit alpha, muscle-specific form | 7,79E-05 | 7,98E-05 | 8,03E-05 | 7,84E-05 | 7,9084E-05  | 1,13206E-06 | 1,431  | 7,74E-05 | 7,34E-05 | 7,49E-05 | 6,93E-05 | 7,32E-05    | 7,36439E-05 | 2,9617E-06  | 4,022  |
| Q3U114 | DDB1_MOUSE  | DNA damage-binding protein 1                                               | 6,52E-05 | 7,67E-05 | 7E-05    | 7,08E-05 | 7,06658E-05 | 4,69346E-06 | 6,642  | 6,5E-05  | 6,23E-05 | 6,13E-05 | 6,07E-05 | 6,85E-05    | 6,35524E-05 | 3,24354E-06 | 5,104  |
| Q9JME5 | AP3B2_MOUSE | AP-3 complex subunit beta-2                                                | 8,63E-05 | 0,000111 | 0,000104 | 0,000106 | 0,000101719 | 1,06402E-05 | 10,460 | 0,00012  | 0,000107 | 9,94E-05 | 0,000103 | 0,000109    | 0,000107535 | 7,76155E-06 | 7,218  |
| P33173 | KIF1A_MOUSE | Kinesin-like protein KIF1A                                                 | 6,64E-05 | 8,45E-05 | 8,22E-05 | 7,59E-05 | 7,72089E-05 | 8,0921E-06  | 10,481 | 8,44E-05 | 7,52E-05 | 7,34E-05 | 6,82E-05 | 6,62E-05    | 7,34857E-05 | 7,10477E-06 | 9,668  |
| Q91ZA3 | PCCA_MOUSE  | Propionyl-CoA carboxylase alpha chain, mitochondrial                       | 0,000135 | 0,000163 | 0,000136 | 0,000134 | 0,000142016 | 1,38048E-05 | 9,721  | 0,000128 | 0,000132 | 0,000123 | 0,00011  | 0,000137    | 0,000126132 | 1,02073E-05 | 8,093  |
| Q6ZPE2 | MTMR5_MOUSE | Myotubularin-related protein 5                                             | 8,75E-05 | 5,56E-05 | 5,61E-05 | 6,2E-05  | 6,52828E-05 | 1,50742E-05 | 23,091 | 6,54E-05 | 3,22E-05 | 6,01E-05 | 6,37E-05 | 5,76E-05    | 5,58311E-05 | 1,35415E-05 | 24,254 |
| Q9EPL8 | IPO7_MOUSE  | Importin-7                                                                 | 3,45E-05 | 4,06E-05 | 4,84E-05 | 3,99E-05 | 4,08552E-05 | 5,73547E-06 | 14,039 | 3,63E-05 | 3,63E-05 | 3,65E-05 | 3,72E-05 | 4,04E-05    | 3,7183E-05  | 1,78456E-06 | 4,782  |
| Q91Z15 | UGPA_MOUSE  | UTP-gamma-1-phosphate uridylyltransferase                                  | 0,000176 | 0,000194 | 0,000197 | 0,000186 | 0,00018824  | 9,64048E-06 | 5,026  | 0,000185 | 0,000164 | 0,000183 | 0,000182 | 0,000168    | 0,000176646 | 9,8066E-06  | 5,552  |
| Q91XM9 | DLG2_MOUSE  | Disks large homolog 2                                                      | 0,000175 | 0,000154 | 0,000164 | 0,000155 | 0,000162088 | 9,54718E-06 | 5,890  | 0,000144 | 0,000145 | 0,000143 | 0,000145 | 0,000174    | 0,000149977 | 1,33311E-05 | 8,889  |
| Q8W037 | SGIP1_MOUSE | SH3-containing GRB2-like protein 3-interacting protein 1                   | 0,000176 | 0,000189 | 0,000178 | 0,000188 | 0,000182732 | 8,65494E-06 | 3,751  | 0,000204 | 0,000167 | 0,000165 | 0,000175 | 0,000198    | 0,000181867 | 1,77847E-06 | 9,779  |
| Q91VR5 | DDX1_MOUSE  | ATP-dependent RNA helicase DDX1                                            | 0,00022  | 0,000243 | 0,000239 | 0,000243 | 0,000236249 | 1,11241E-05 | 4,709  | 0,000243 | 0,00023  | 0,000236 | 0,000226 | 0,000249    | 0,000236697 | 9,52046E-06 | 4,022  |
| Q60737 | CSK21_MOUSE | Casein kinase II subunit alpha                                             | 4,07E-05 | 3,79E-05 | 3,98E-05 | 4,23E-05 | 4,01744E-05 | 1,85396E-06 | 4,615  | 4,13E-05 | 3,87E-05 | 3,8E-05  | 3,48E-05 | 4,38E-05    | 3,93217E-05 | 3,40052E-06 | 8,648  |
| P12787 | COX5A_MOUSE | Cytochrome c oxidase subunit 5A, mitochondrial                             | 0,000121 | 0,000187 | 0,000169 | 0,000172 | 0,000162068 | 2,83665E-05 | 17,503 | 0,000118 | 0,000163 | 0,000176 | 0,000171 | 0,000169    | 0,000159392 | 2,33896E-05 | 14,674 |
| P84075 | HPCA_MOUSE  | Neuron-specific calcium-binding protein hippocalin                         | 0,000121 | 0,000128 | 0,000127 | 0,000159 | 0,00013383  | 1,73476E-05 | 12,962 | 8,64E-05 | 8,66E-05 | 0,000109 | 0,000116 | 0,000115    | 0,000102379 | 1,4755E-05  | 14,412 |
| Q9CYH2 | F213A_MOUSE | Redox-regulatory protein FAM213A                                           | 0,000348 | 0,000358 | 0,000337 | 0,00034  | 0,000345786 | 9,425E-06   | 2,726  | 0,000297 | 0,000361 | 0,00032  | 0,000317 | 0,000306    | 0,000320327 | 2,46079E-05 | 7,682  |
| Q9WTP7 | KAD3_MOUSE  | GTP-AMP phosphotransferase AK3, mitochondrial                              | 0,000146 | 0,000135 | 0,000145 | 0,000143 | 0,000142217 | 4,97167E-06 | 3,496  | 0,000139 | 0,000149 | 0,00013  | 0,0001   | 8,33E-05    | 0,000120207 | 2,75446E-05 | 22,914 |
| Q9JKK7 | TMOD2_MOUSE | Tropomodulin-2                                                             | 7,28E-05 | 7,29E-05 | 7,18E-05 | 7,13E-05 | 7,22096E-05 | 6,79238E-07 | 1,065  | 7,04E-05 | 6,74E-05 | 7,03E-05 | 7,16E-05 | 6,91463E-05 | 2,3087E-06  | 3,339       |        |
| Q35954 | PITM1_MOUSE | Membrane-associated phosphatidylinositol transfer protein 1                | 0,00016  | 0,000172 | 0,000172 | 0,00016  | 0,000165861 | 7,14211E-06 | 4,306  | 0,000187 | 0,000169 | 0,000166 | 0,000172 | 0,000173    | 0,000173231 | 7,99093E-06 | 4,613  |
| Q8K406 | LG13_MOUSE  | Leucine-rich repeat LG1 family member 3                                    | 6,91E-05 | 8,78E-05 | 5,99E-05 | 6,51E-05 | 7,04643E-05 | 1,21194E-05 | 17,199 | 8,42E-05 | 8,05E-05 | 7,43E-05 | 7,57E-05 | 6,88E-05    | 7,67072E-05 | 5,92501E-06 | 7,724  |
| Q8VCW8 | ACSF2_MOUSE | Acyl-CoA synthetase family member 2, mitochondrial                         | 6,14E-05 | 8,31E-05 | 6,77E-05 | 6,72E-05 | 6,9848E-05  | 9,28477E-06 | 13,293 | 6,02E-05 | 7,61E-05 | 7,31E-05 | 5,59E-05 | 7,61E-05    | 6,8277E-05  | 9,55499E-06 | 13,994 |
| Q9Z0P4 | PALM_MOUSE  | Paralemmin-1                                                               | 0,000315 | 0,000388 | 0,000411 | 0,000384 | 0,000374428 | 4,161E-05   | 11,113 | 0,000399 | 0,000344 | 0,00037  | 0,000386 | 0,000397    | 0,00037917  | 2,26314E-05 | 5,969  |
| Q8R464 | CADM4_MOUSE | Cell adhesion molecule 4                                                   | 0,000256 | 0,000205 | 0,000223 | 0,000264 | 0,000248055 | 1,78102E-05 | 7,180  | 0,000241 | 0,000272 | 0,000295 | 0,000273 | 0,000253    | 0,000266764 | 2,08427E-05 | 7,813  |
| O35295 | PURB_MOUSE  | Transcriptional activator protein Pur-beta                                 | 0,000103 | 0,000112 | 0,000123 | 0,000141 | 0,00012171  | 1,52207E-05 | 12,506 | 0,000115 | 0,000107 | 0,000118 | 0,000121 | 9,77E-05    | 0,000111649 | 9,3839E-06  | 8,405  |
| P01942 | HBA_MOUSE   | Hemoglobin subunit alpha                                                   | 0,000215 | 9,66E-05 | 0,000146 | 0,00017  | 0,000157004 | 4,93565E-05 | 31,436 | 0,000103 | 0,000103 | 8,59E-05 | 5,76E-05 | 7,18E-05    | 8,41442E-05 | 1,96951E-05 | 23,405 |
| Q62443 | NPTX1_MOUSE | Neuronal pentraxin-1                                                       | 4,5E-05  | 4,21E-05 | 4,78E-05 | 5,11E-05 | 4,65127E-05 | 3,85058E-06 | 8,279  | 3,9E-05  | 3,18E-05 | 4,62E-05 | 3,62E-05 | 3,6E-05     | 3,78635E-05 | 5,30786E-06 | 14,018 |
| Q9R0P3 | ESTD_MOUSE  | S-formylglutathione hydrolase                                              | 0,000147 | 0,000137 | 0,000122 | 0,000137 | 0,000135462 | 1,04531E-05 | 7,717  | 0,000136 | 0,000154 | 0,000133 | 0,000113 | 0,000124    | 0,00013183  | 1,49017E-05 | 11,304 |
| O88741 | GDAP1_MOUSE | Ganglioside-induced differentiation-associated protein 1                   | 0,000133 | 0,000121 | 9,51E-05 | 0,000132 | 0,000120264 | 1,75789E-05 | 14,617 | 0,000135 | 0,000132 | 0,000121 | 0,000128 | 0,000122    | 0,000127758 | 5,93163E-06 | 4,643  |
| P51859 | HDFG_MOUSE  | Hepatoma-derived growth factor                                             | 8,74E-05 | 8,57E-05 | 8,79E-05 | 8,89E-05 | 8,74906E-05 | 1,36048E-06 | 1,555  | 7,39E-05 | 5,14E-05 | 8,24E-05 | 8,48E-   |             |             |             |        |

|        |             |                                                                    |          |          |          |          |             |             |         |          |          |          |          |          |             |             |         |
|--------|-------------|--------------------------------------------------------------------|----------|----------|----------|----------|-------------|-------------|---------|----------|----------|----------|----------|----------|-------------|-------------|---------|
| G5E8K5 | ANK3_MOUSE  | Ankyrin-3                                                          | 0,000113 | 0,000105 | 0,0001   | 0,000101 | 0,000104979 | 6,014E-06   | 5,729   | 0,000114 | 0,000107 | 0,000106 | 0,000101 | 0,000111 | 0,000107861 | 4,76103E-06 | 4,414   |
| Q810U4 | NRCAM_MOUSE | Neuronal cell adhesion molecule                                    | 0,000223 | 0,000246 | 0,000256 | 0,000188 | 0,00022832  | 2,99436E-05 | 13,115  | 0,000198 | 0,000242 | 0,000238 | 0,000224 | 0,000249 | 0,000230264 | 2,03545E-05 | 8,840   |
| Q9D394 | RUFY3_MOUSE | Protein RUFY3                                                      | 0,000175 | 0,000175 | 0,000164 | 0,000157 | 0,000167671 | 8,88159E-06 | 5,297   | 0,000182 | 0,000171 | 0,000177 | 0,000172 | 0,000163 | 0,000172968 | 7,0002E-06  | 4,047   |
| Q9CZD3 | SYG_MOUSE   | Glycine-tRNA ligase                                                | 0,000139 | 0,000168 | 0,000115 | 0,000114 | 0,000149348 | 1,33807E-05 | 8,959   | 0,000148 | 0,000149 | 0,000146 | 0,000115 | 0,000165 | 0,000151632 | 7,57404E-06 | 4,995   |
| Q9ESN6 | TRIM2_MOUSE | Tripartite motif-containing protein 2                              | 9,52E-05 | 0,000114 | 0,000104 | 0,000107 | 0,000104967 | 7,92332E-06 | 7,548   | 0,000112 | 0,000109 | 0,000105 | 0,000114 | 0,000112 | 0,000113962 | 5,44033E-06 | 4,859   |
| Q9CQK1 | TRAP1_MOUSE | Heat shock protein 75 kDa, mitochondrial                           | 3,75E-05 | 3,48E-05 | 3,25E-05 | 4,12E-05 | 3,65023E-05 | 3,73582E-06 | 10,234  | 3,63E-05 | 4,06E-05 | 3,52E-05 | 3,63E-05 | 3,82E-05 | 3,73211E-05 | 2,11621E-06 | 5,670   |
| P49025 | CTRO_MOUSE  | Citron Rho-interacting kinase                                      | 1,97E-05 | 2,26E-05 | 2,1E-05  | 2,34E-05 | 2,16895E-05 | 1,64207E-06 | 7,571   | 2,63E-05 | 2,34E-05 | 2,13E-05 | 2,39E-05 | 2,38E-05 | 2,37531E-05 | 1,76156E-06 | 7,416   |
| P35585 | AP1M1_MOUSE | AP-1 complex subunit mu-1                                          | 0,000171 | 0,000184 | 0,000117 | 0,000174 | 0,000174513 | 6,53391E-06 | 3,744   | 0,000179 | 0,000158 | 0,000118 | 0,000165 | 0,000188 | 0,000174019 | 1,22238E-05 | 7,024   |
| P21107 | TPM3_MOUSE  | Tropomyosin alpha-3 chain                                          | 0,000242 | 0,000254 | 0,000251 | 0,000239 | 0,000246438 | 7,11753E-06 | 2,888   | 0,000247 | 0,000185 | 0,000251 | 0,000238 | 0,000237 | 0,000231416 | 2,67076E-05 | 11,541  |
| Q60598 | SRC8_MOUSE  | Src substrate cortactin                                            | 0,000184 | 0,00019  | 0,000193 | 0,000201 | 0,000191865 | 7,18263E-06 | 3,744   | 0,000165 | 0,000138 | 0,000154 | 0,000138 | 0,000184 | 0,000155823 | 1,93398E-05 | 12,411  |
| Q8BKX1 | BAIP2_MOUSE | Brain-specific angiogenesis inhibitor 1-associated protein 2       | 0,000146 | 0,000151 | 0,000207 | 0,000157 | 0,000165142 | 2,85313E-05 | 17,277  | 0,000166 | 0,000146 | 0,000171 | 0,000193 | 0,000214 | 0,000177868 | 2,59699E-05 | 14,601  |
| Q8C419 | GP158_MOUSE | Probable G-protein coupled receptor 158                            | 2,53E-05 | 2,37E-05 | 2,64E-05 | 2,35E-05 | 2,4717E-05  | 1,39009E-06 | 5,624   | 2,22E-05 | 2,71E-05 | 2,45E-05 | 2,55E-05 | 2,55E-05 | 2,49679E-05 | 1,81327E-06 | 7,262   |
| Q8VBW6 | ULA1_MOUSE  | NEDD8-activating enzyme E1 regulatory subunit                      | 2,58E-05 | 2,81E-05 | 2,93E-05 | 2,88E-05 | 2,79989E-05 | 1,52499E-06 | 5,447   | 3,38E-05 | 2,5E-05  | 2,66E-05 | 2,31E-05 | 2,83E-05 | 2,73627E-05 | 4,09477E-06 | 14,965  |
| P49615 | CDK5_MOUSE  | Cyclin-dependent-like kinase 5                                     | 0,00022  | 0,000197 | 0,00022  | 0,000236 | 0,000218334 | 1,61486E-05 | 7,396   | 0,00019  | 0,000204 | 0,000203 | 0,000172 | 0,000164 | 0,000186475 | 1,82984E-05 | 9,813   |
| Q9Z122 | STRAP_MOUSE | Serine-threonine kinase receptor-associated protein                | 7,96E-05 | 7,18E-05 | 8,63E-05 | 7,78E-05 | 7,8864E-05  | 5,9631E-06  | 7,561   | 7,1E-05  | 6,3E-05  | 7,07E-05 | 6,77E-05 | 5,7E-05  | 6,58583E-05 | 5,92926E-06 | 9,003   |
| O70325 | GPX4_MOUSE  | Phospholipid hydroperoxide glutathione peroxidase, mitochondrial   | 6,77E-05 | 6,4E-05  | 5,74E-05 | 6,43E-05 | 6,33467E-05 | 4,30673E-06 | 6,799   | 5,83E-05 | 6,21E-05 | 7,11E-05 | 5,89E-05 | 4,58E-05 | 5,9234E-05  | 9,09209E-06 | 15,349  |
| Q61035 | SYHC_MOUSE  | Histidine-tRNA ligase, cytoplasmic                                 | 2,45E-05 | 2,61E-05 | 2,73E-05 | 2,73E-05 | 2,62759E-05 | 1,3373E-06  | 5,089   | 2,39E-05 | 2,34E-05 | 2,65E-05 | 2,37E-05 | 2,08E-05 | 2,36547E-05 | 2,01082E-06 | 8,501   |
| O35864 | CSN5_MOUSE  | COPI9 signalosome complex subunit 5                                | 7,16E-05 | 6,75E-05 | 6,82E-05 | 7,37E-05 | 7,02417E-05 | 2,89916E-06 | 4,127   | 6,43E-05 | 6,27E-05 | 6,01E-05 | 5,27E-05 | 4,92E-05 | 5,77979E-05 | 6,57101E-06 | 11,369  |
| P28867 | KPCD_MOUSE  | Protein kinase C delta type                                        | 0,000184 | 0,000132 | 9,88E-05 | 8,99E-05 | 0,000126036 | 4,23883E-05 | 33,632  | 0,000211 | 0,000157 | 0,000145 | 0,000152 | 0,000159 | 0,000164909 | 2,6514E-05  | 16,078  |
| Q9JLM8 | DCLK1_MOUSE | Serine/threonine-protein kinase DCLK1                              | 7,54E-05 | 7,95E-05 | 9,87E-05 | 7,36E-05 | 8,17801E-05 | 1,15281E-05 | 14,097  | 0,000106 | 7,39E-05 | 8,11E-05 | 8,34E-05 | 8,46E-05 | 8,58792E-05 | 1,22168E-05 | 14,226  |
| Q60625 | ICAM5_MOUSE | Intercellular adhesion molecule 5                                  | 2,79E-05 | 4,9E-05  | 0,0001   | 7,18E-05 | 6,2218E-05  | 3,10486E-05 | 49,903  | 4,26E-05 | 2,68E-05 | 3,69E-05 | 4,07E-05 | 6,62E-05 | 4,26529E-05 | 1,45297E-05 | 34,065  |
| Q7TMF3 | NDUAC_MOUSE | NADH dehydrogenase [ubiquinone] 1 alpha subcomplex subunit 12      | 6,29E-05 | 6,47E-05 | 7,33E-05 | 7,07E-05 | 6,79195E-05 | 4,91437E-06 | 7,236   | 6,39E-05 | 6,91E-05 | 8,15E-05 | 7,62E-05 | 7,02E-05 | 7,21814E-05 | 6,78722E-06 | 9,403   |
| P17156 | HSP72_MOUSE | Heat shock-related 70 kDa protein 2                                | 9,25E-05 | 0,000126 | 0,000138 | 0,000124 | 0,00012012  | 1,93539E-05 | 16,112  | 0,000101 | 0,000105 | 0,000107 | 0,000101 | 0,000115 | 0,000105741 | 5,85391E-06 | 5,536   |
| Q61937 | NPM_MOUSE   | Nucleophosmin                                                      | 6,22E-05 | 6,5E-05  | 6,5E-05  | 7,58E-05 | 6,70094E-05 | 6,0283E-06  | 8,996   | 6,26E-05 | 5,99E-05 | 6,85E-05 | 6,19E-05 | 5,28E-05 | 6,11479E-05 | 5,66816E-06 | 9,270   |
| Q3U1U3 | THEM4_MOUSE | Acyl-coenzyme A thioesterase THEM4                                 | 2,67E-05 | 2,35E-05 | 4E-07    | 3,37E-05 | 2,10823E-05 | 1,44249E-05 | 68,422  | 3,09E-05 | 3,2E-05  | 3,79E-05 | 4,29E-05 | 3,75E-05 | 3,62227E-05 | 4,89106E-06 | 13,503  |
| P26516 | PSMD7_MOUSE | 26S proteasome non-ATPase regulatory subunit 7                     | 4,76E-05 | 5,54E-05 | 5,46E-05 | 4,9E-05  | 5,16425E-05 | 3,90129E-06 | 7,554   | 5,32E-05 | 4,44E-05 | 5,33E-05 | 5,05E-05 | 5,33E-05 | 5,0953E-05  | 3,84775E-06 | 7,552   |
| Q91WJ8 | FUBP1_MOUSE | Far upstream element-binding protein 1                             | 3,81E-05 | 4,5E-05  | 5,11E-05 | 5,58E-05 | 4,74922E-05 | 7,67634E-06 | 16,163  | 4,75E-05 | 3,75E-05 | 4,73E-05 | 4,53E-05 | 5,31E-05 | 4,61493E-05 | 5,62001E-06 | 12,178  |
| Q6VVG3 | KCD12_MOUSE | BTB/POZ domain-containing protein KCD12.1                          | 9,85E-05 | 0,000103 | 0,000107 | 0,000113 | 0,000105314 | 6,20689E-06 | 5,894   | 9,58E-05 | 8,7E-05  | 9,99E-05 | 9,76E-05 | 0,000116 | 9,92444E-05 | 1,05776E-05 | 10,658  |
| Q8BGZ1 | HPCL4_MOUSE | Hippocalcin-like protein 4                                         | 7,81E-06 | 9,12E-06 | 1,1E-05  | 1,11E-05 | 9,76261E-06 | 1,5882E-06  | 16,268  | 1,06E-05 | 1,28E-05 | 1,56E-05 | 1,38E-05 | 1,31E-05 | 1,31716E-05 | 1,80249E-06 | 13,685  |
| O55013 | TPPC3_MOUSE | Hippocampal protein particle complex subunit 3                     | 2,1E-05  | 1,72E-05 | 1,85E-05 | 1,87E-05 | 1,8872E-05  | 1,59624E-06 | 8,458   | 1,59E-05 | 1,96E-05 | 2,2E-05  | 1,84E-05 | 1,9E-05  | 1,89564E-05 | 2,20802E-06 | 11,648  |
| Q9DBE8 | ALG2_MOUSE  | Alpha-1,3/1,6-mannosyltransferase ALG2                             | 4,85E-05 | 4,86E-05 | 3,82E-05 | 5,43E-05 | 4,7395E-05  | 6,70465E-06 | 14,146  | 4,54E-05 | 4,37E-05 | 4,44E-05 | 4,64E-05 | 3,49E-05 | 4,29607E-05 | 4,58931E-06 | 10,683  |
| Q9EQ26 | RPGF4_MOUSE | Rap guanine nucleotide exchange factor 4                           | 0        | 0        | 0        | 0        | 0           | 0           | #DIV/0! | 0        | 0        | 0        | 0        | 0        | 0           | 0           | #DIV/0! |
| Q9R1P3 | PSB2_MOUSE  | Proteasome subunit beta type-2                                     | 0,000276 | 0,000232 | 0,000194 | 0,000318 | 0,000255015 | 5,37336E-05 | 21,071  | 0,000202 | 0,000146 | 0,000257 | 0,000248 | 0,000224 | 0,000215365 | 4,43615E-05 | 20,598  |
| Q9Z0Y1 | DCTN3_MOUSE | Dynactin subunit 3                                                 | 9,99E-05 | 0,000104 | 9,61E-05 | 0,000108 | 0,000102221 | 5,34359E-06 | 5,227   | 9,74E-05 | 0,000105 | 0,000107 | 0,000103 | 8,4E-05  | 9,93532E-05 | 9,31158E-06 | 9,372   |
| Q8K021 | SCAM1_MOUSE | Secretory carrier-associated membrane protein 1                    | 3,93E-05 | 4,37E-05 | 3,57E-05 | 3,98E-05 | 3,96324E-05 | 3,29122E-06 | 8,304   | 3,91E-05 | 3,49E-05 | 3,65E-05 | 3,54E-05 | 3,2E-05  | 3,55685E-05 | 2,59606E-06 | 7,299   |
| P35803 | GPM6B_MOUSE | Neuronal membrane glycoprotein M6-b                                | 0,000175 | 0,000154 | 0,000181 | 0,000154 | 0,000165611 | 1,41517E-05 | 8,545   | 0,000163 | 0,000177 | 0,000177 | 0,00016  | 0,000204 | 0,000175953 | 1,7432E-05  | 9,907   |
| P28658 | ATX10_MOUSE | Ataxin-10                                                          | 3,41E-05 | 4,31E-05 | 3,93E-05 | 5,03E-05 | 4,1684E-05  | 6,84027E-06 | 16,410  | 3,58E-05 | 4,03E-05 | 4,31E-05 | 3,78E-05 | 3,57E-05 | 3,85547E-05 | 3,16886E-06 | 8,219   |
| Q61029 | LAP2B_MOUSE | Lamina-associated polypeptide 2, isoforms beta/delta/epsilon/gamma | 3,33E-05 | 3,69E-05 | 3,25E-05 | 3,43E-05 | 3,34263E-05 | 1,95465E-06 | 5,708   | 3,17E-05 | 2,77E-05 | 3,03E-05 | 3,48E-05 | 3,14E-05 | 3,11928E-05 | 2,56939E-06 | 8,237   |
| Q9D6K5 | SYJ2B_MOUSE | Synaptotagmin-2-binding protein                                    | 2,08E-05 | 2,18E-05 | 2,44E-05 | 2,27E-05 | 2,24322E-05 | 1,55034E-06 | 6,911   | 2,29E-05 | 2,24E-05 | 2,52E-05 | 2,17E-05 | 1,86E-05 | 2,21552E-05 | 2,37051E-06 | 10,700  |
| Q99L43 | CDS2_MOUSE  | Phosphatidate cytidyltransferase 2                                 | 9,72E-05 | 0,000105 | 3,31E-05 | 8,68E-05 | 8,04413E-05 | 3,24054E-05 | 40,284  | 0,000105 | 0,0001   | 3,26E-05 | 7,6E-05  | 9,28E-05 | 8,12564E-05 | 2,93107E-05 | 36,072  |
| Q9QV8  | STUM_MOUSE  | Protein stum homolog                                               | 2,21E-05 | 2,83E-05 | 3,88E-05 | 3,46E-05 | 3,09428E-05 | 7,28582E-06 | 23,546  | 2,99E-05 | 2,43E-05 | 3,09E-05 | 2,69E-05 | 5,35E-05 | 2,94625E-05 | 4,18092E-06 | 14,191  |
| Q8CAE9 | PDXL2_MOUSE | #N/A                                                               | 2,26E-05 | 2,47E-05 | 2,49E-05 | 2,35E-05 | 2,39291E-05 | 1,0981E-06  | 4,589   | 2,16E-05 | 1,88E-05 | 1,82E-05 | 2,23E-05 | 2,13E-05 | 2,04495E-05 | 1,85192E-06 | 9,056   |
| Q8K310 | MATR3_MOUSE | Matrin-3                                                           | 4,64E-05 | 6,35E-05 | 5,7E-05  | 6,51E-05 | 5,79997E-05 | 8,48121E-06 | 14,623  | 7,24E-05 | 6,39E-05 | 6,56E-05 | 6,19E-05 | 6,56E-05 | 6,47272E-05 | 5,81429E-06 | 8,983   |
| Q61330 | CNTN2_MOUSE | Contactin-2                                                        | 0,0001   | 9,74E-05 | 8,81E-05 | 6,52E-05 | 8,77051E-05 | 1,58805E-05 | 18,107  | 9,82E-05 | 9,36E-05 | 9,62E-05 | 9,23E-05 | 6,73E-05 | 8,95156E-05 | 1,26376E-05 | 14,118  |
| Q9CR16 | PPID_MOUSE  | Peptidyl-prolyl cis-trans isomerase D                              | 5,6E-05  | 5,72E-05 | 5,82E-05 | 6,65E-05 | 5,94802E-05 | 4,76412E-06 | 8,010   | 6,15E-05 | 5,84E-05 | 6,25E-05 | 6,06E-05 | 5,63E-05 | 5,98555E-05 | 2,50072E-06 | 4,178   |
| Q8K212 | PACS1_MOUSE | Phosphofurin acidic cluster sorting protein 1                      | 3,36E-05 | 6,46E-05 | 6,74E-05 | 6,65E-05 | 5,80321E-05 | 1,63383E-05 | 28,154  | 6,52E-05 | 5,75E-05 | 6,61E-05 | 5,22E-05 | 6,87E-05 | 6,19481E-05 | 6,83524E-06 | 11,034  |
| Q9JLN9 | MTOR_MOUSE  | Serine/threonine-protein kinase mTOR                               | 1,9E-05  | 2,21E-05 | 2,71E-05 | 2,35E-05 | 2,29396E-05 | 3,36884E-06 | 14,686  | 1,99E-05 | 1,24E-05 | 1,76E-05 | 1,8E-05  | 2,07E-05 | 1,77404E-05 | 3,25287E-06 | 18,336  |
| Q61490 | CD166_MOUSE | CD166 antigen                                                      | 0,000165 | 0,000195 | 0,000228 | 0,000177 | 0,000191076 | 2,72337E-05 | 14,253  | 0,000175 | 0,000143 | 0,000182 | 0,000193 | 0,000228 | 0,00018421  | 3,08135E-05 | 16,727  |
| Q91VN4 | MIC25_MOUSE | MICOS complex subunit Mic25                                        | 4,17E-05 | 3,88E-05 | 4,16E-05 | 3,96E-05 | 4,04159E-05 | 1,4334E-06  | 3,547   | 3,86E-05 | 2,9E-05  | 4,16E-05 | 4,14E-05 | 3,99E-05 | 3,8103E-05  | 5,20904E-06 | 13,671  |
| Q5EBJ4 | ERMIN_MOUSE | Ermin                                                              | 7,68E-05 | 7,1E-05  | 5,89E-05 | 6,57E-05 | 6,8097E-05  | 7,60872E-06 | 11,173  | 7,92E-05 | 6,67E-05 | 6,77E-05 | 6,4E-05  | 6,33E-05 | 6,81766E-05 | 6,43553E-06 | 9,440   |
| Q9WUR9 | KAD4_MOUSE  | Adenylate kinase 4, mitochondrial                                  | 3,42E-05 | 3,19E-05 | 3,84E-05 | 4,04E-05 | 3,62034E-05 | 3,88802E-06 | 10,740  | 3,08E-05 | 3,52E-05 | 3,38E-05 | 2,8E-05  | 3,22E-05 | 3,20030E-05 | 2,80504E-06 | 8,766   |
| Q9Z2E4 | PCY2_MOUSE  | Ethanolamine-phosphate cytidyltransferase                          | 3,31E-05 | 3,88E-05 | 3,89E-05 | 3,97E-05 | 3,76242E-05 | 3,06972E-06 | 8,159   | 3,78E-05 | 3,74E-05 | 3,2E-05  | 3,33E-05 | 3,73E-05 | 3,55585E-05 | 2,69485E-06 | 7,579   |
| Q8R3P0 | ACY2_MOUSE  | Aspartoacylase                                                     | 0        |          |          |          |             |             |         |          |          |          |          |          |             |             |         |

|        |             |                                                                         |          |          |          |          |             |             |        |          |          |          |          |          |             |             |        |
|--------|-------------|-------------------------------------------------------------------------|----------|----------|----------|----------|-------------|-------------|--------|----------|----------|----------|----------|----------|-------------|-------------|--------|
| Q6P069 | SORCN_MOUSE | Sorcin                                                                  | 8,15E-05 | 8,83E-05 | 8,34E-05 | 8,71E-05 | 8,50761E-05 | 3,1774E-06  | 3,735  | 7,14E-05 | 6,4E-05  | 8,27E-05 | 6,86E-05 | 5,68E-05 | 6,86956E-05 | 9,59685E-06 | 13,970 |
| O70172 | PI42A_MOUSE | Phosphatidylinositol 5-phosphate 4-kinase type-2 alpha                  | 7,51E-05 | 0,000108 | 8,06E-05 | 8,72E-05 | 8,76027E-05 | 1,41616E-05 | 16,166 | 9,37E-05 | 6,78E-05 | 9,54E-05 | 0,000117 | 0,0001   | 9,47989E-05 | 1,76746E-05 | 18,644 |
| P31786 | ACBP_MOUSE  | Acyl-CoA-binding protein                                                | 7,91E-05 | 0,000113 | 0,000136 | 0,000127 | 0,000114001 | 2,5136E-05  | 22,049 | 6,67E-05 | 7,76E-05 | 0,000108 | 0,000115 | 0,000103 | 9,41779E-05 | 2,08791E-05 | 22,170 |
| P61957 | SUMO2_MOUSE | Small ubiquitin-related modifier 2                                      | 2,73E-05 | 2,76E-05 | 3,59E-05 | 3,27E-05 | 3,08722E-05 | 4,45458E-06 | 13,457 | 2,46E-05 | 2,89E-05 | 2,9E-05  | 2,57E-05 | 2,33E-05 | 2,63153E-05 | 2,537E-06   | 9,641  |
| Q91ZK7 | LRP1_MOUSE  | Protein-disulphide lipoprotein receptor-related protein 1               | 6,03E-05 | 7,33E-05 | 6,57E-05 | 6,26E-05 | 6,54594E-05 | 5,6475E-06  | 8,639  | 6,66E-05 | 6,6E-05  | 6,14E-05 | 6,24E-05 | 6,66E-05 | 6,46023E-05 | 2,51081E-06 | 3,887  |
| O8C1A5 | THOP1_MOUSE | Thimet oligopeptidase                                                   | 4,56E-05 | 4,62E-05 | 4,71E-05 | 5,19E-05 | 4,76809E-05 | 2,87254E-06 | 6,025  | 5,53E-05 | 5,42E-05 | 4,98E-05 | 5,56E-05 | 5,27E-05 | 5,32030E-05 | 2,36235E-06 | 4,414  |
| Q06138 | CAB39_MOUSE | Calcium-binding protein 39                                              | 0,000119 | 3,94E-05 | 8,04E-05 | 0,000111 | 8,74172E-05 | 3,6051E-05  | 41,240 | 0,000109 | 0,000113 | 9,83E-05 | 0,000118 | 8,92E-05 | 0,000105454 | 1,16701E-05 | 11,067 |
| Q64516 | GLPK_MOUSE  | Glycerol kinase                                                         | 9,67E-05 | 8,64E-05 | 9,17E-05 | 8,33E-05 | 8,95175E-05 | 5,93288E-06 | 6,628  | 7,82E-05 | 7,01E-05 | 7,54E-05 | 8,04E-05 | 6,92E-05 | 7,46771E-05 | 4,90543E-06 | 6,569  |
| P49442 | INPP_MOUSE  | Inositol polyphosphate 1-phosphatase                                    | 9,63E-05 | 9,24E-05 | 9,89E-05 | 0,000108 | 9,88302E-05 | 6,45032E-06 | 6,527  | 8,91E-05 | 7,83E-05 | 8,36E-05 | 9,79E-05 | 8,58E-05 | 8,69368E-05 | 7,27774E-06 | 8,371  |
| Q9CZ88 | RS19_MOUSE  | 40S ribosomal protein S19                                               | 1,03E-05 | 9,52E-06 | 1,23E-05 | 1,23E-05 | 1,11287E-05 | 1,42855E-06 | 12,837 | 1,41E-05 | 1,64E-05 | 1,38E-05 | 1,32E-05 | 1,27E-05 | 1,40521E-05 | 1,43744E-06 | 10,229 |
| P63037 | DNJA1_MOUSE | DnaJ homolog subfamily A member 1                                       | 6,41E-05 | 7,74E-05 | 6,88E-05 | 7,09E-05 | 7,03029E-05 | 5,5161E-06  | 7,846  | 6,3E-05  | 6,57E-05 | 6,01E-05 | 6,95E-05 | 6,63E-05 | 7,09176E-05 | 1,45891E-05 | 20,572 |
| Q80VP1 | EPN1_MOUSE  | Epsin-1                                                                 | 6,72E-05 | 7,2E-05  | 7,41E-05 | 7,78E-05 | 7,27863E-05 | 4,4294E-06  | 6,085  | 7,3E-05  | 6,3E-05  | 7,17E-05 | 8,62E-05 | 8,88E-05 | 7,6549E-05  | 1,07633E-05 | 15,061 |
| Q9QZK7 | SRR_MOUSE   | Serine racemase                                                         | 1,31E-05 | 1,36E-05 | 1,58E-05 | 1,4E-05  | 1,41391E-05 | 1,19305E-06 | 8,438  | 1,35E-05 | 1,16E-05 | 1,31E-05 | 8,1E-07  | 1,78E-05 | 1,13479E-05 | 6,3254E-06  | 55,741 |
| P27659 | RL3_MOUSE   | 60S ribosomal protein L3                                                | 7,53E-05 | 8,94E-05 | 7,86E-05 | 8,78E-05 | 8,27808E-05 | 6,86772E-06 | 8,296  | 8,66E-05 | 8,53E-05 | 8,67E-05 | 8,68E-05 | 7,75E-05 | 8,45622E-05 | 4,00934E-06 | 4,741  |
| Q9D7X3 | DUS3_MOUSE  | Dual specificity protein phosphatase 3                                  | 3,68E-05 | 4,52E-05 | 4,45E-05 | 4,63E-05 | 4,31974E-05 | 4,34792E-06 | 10,065 | 4,79E-05 | 4,04E-05 | 4,34E-05 | 3,92E-05 | 4,07E-05 | 4,23093E-05 | 3,46319E-06 | 8,185  |
| Q9D1D4 | TMEDA_MOUSE | Transmembrane emp24 domain-containing protein 10                        | 6,52E-05 | 7E-05    | 6,66E-05 | 6,94E-05 | 6,78044E-05 | 2,28005E-06 | 3,363  | 5,86E-05 | 6,77E-05 | 6,94E-05 | 5,36E-05 | 6,2E-05  | 6,22577E-05 | 6,51215E-06 | 10,460 |
| Q80W65 | LRC8A_MOUSE | Volume-regulated anion channel subunit LRC8A                            | 4,83E-05 | 5,66E-05 | 3,78E-05 | 5,08E-05 | 4,83754E-05 | 7,87721E-06 | 16,284 | 5,37E-05 | 4,95E-05 | 5,1E-05  | 5,54E-05 | 5,16E-05 | 5,22505E-05 | 2,32878E-06 | 4,457  |
| Q99L62 | TNPO2_MOUSE | Transportin-2                                                           | 2,39E-05 | 2,65E-05 | 2,48E-05 | 2,65E-05 | 2,54616E-05 | 1,28907E-06 | 5,063  | 2,42E-05 | 1,68E-05 | 2E-05    | 2,83E-05 | 2,19E-05 | 2,22307E-05 | 4,31909E-06 | 19,428 |
| Q9DCT8 | CRIP2_MOUSE | Cystine-rich protein 2                                                  | 4,25E-05 | 3,96E-05 | 3,85E-05 | 4,17E-05 | 4,05766E-05 | 1,87274E-06 | 4,615  | 4,58E-05 | 4,94E-05 | 4,04E-05 | 4,31E-05 | 5,46E-05 | 4,6669E-05  | 5,54042E-06 | 11,872 |
| Q68FH0 | PKP4_MOUSE  | Plakophilin-4                                                           | 2,46E-05 | 2,99E-05 | 3,18E-05 | 3,16E-05 | 2,94615E-05 | 3,37119E-06 | 11,443 | 3,2E-05  | 2,83E-05 | 2,71E-05 | 2,87E-05 | 2,83E-05 | 2,88664E-05 | 1,85735E-06 | 6,434  |
| Q8BFZ3 | ACTBL_MOUSE | Beta-actin-like protein 2                                               | 5,12E-05 | 5,26E-05 | 5,51E-05 | 6,35E-05 | 5,56127E-05 | 5,50941E-06 | 9,907  | 4,98E-05 | 4,52E-05 | 5,44E-05 | 0,000167 | 6,14E-05 | 7,55344E-05 | 5,14566E-05 | 68,123 |
| Q4V9Z5 | SE6L2_MOUSE | Seizure 6-like protein 2                                                | 2,39E-05 | 3,63E-05 | 3,68E-05 | 3,86E-05 | 3,38905E-05 | 6,75005E-06 | 19,917 | 3,77E-05 | 1,6E-05  | 3,5E-05  | 3,75E-05 | 3,09E-05 | 3,14136E-05 | 9,04906E-06 | 28,806 |
| Q921G7 | ETFD_MOUSE  | Electron transfer flavoprotein-ubiquinone oxidoreductase, mitochondrial | 0,000118 | 0,000117 | 0,000107 | 9,88E-05 | 0,000110172 | 9,12376E-06 | 8,281  | 8,94E-05 | 9,05E-05 | 0,000102 | 8,35E-05 | 9,21E-05 | 9,13982E-05 | 6,52408E-06 | 7,138  |
| Q8BLI3 | PLCX3_MOUSE | PI-PLC X domain-containing protein 3                                    | 4,22E-05 | 6,45E-05 | 7,38E-05 | 7,14E-05 | 6,29972E-05 | 1,44003E-05 | 22,863 | 5,62E-05 | 5,53E-05 | 6,7E-05  | 5,85E-05 | 5,52E-05 | 5,84482E-05 | 4,93999E-06 | 8,452  |
| Q924M7 | MPI_MOUSE   | Mannose-6-phosphate isomerase                                           | 5,85E-05 | 7,17E-05 | 6,68E-05 | 6,59E-05 | 6,57393E-05 | 5,43867E-06 | 8,273  | 6,5E-05  | 5,8E-05  | 5,89E-05 | 6,27E-05 | 5,6E-05  | 6,01346E-05 | 3,66926E-06 | 6,102  |
| Q5SRX1 | TM1L2_MOUSE | TM1-like protein 2                                                      | 0,000106 | 0,000106 | 0,000112 | 0,000104 | 0,000107224 | 3,45179E-06 | 3,219  | 9,86E-05 | 9,28E-05 | 0,000108 | 0,0001   | 9,63E-05 | 9,91615E-05 | 5,58703E-06 | 5,634  |
| Q921P6 | NDUA7_MOUSE | NADH dehydrogenase [ubiquinone] 1 alpha subcomplex subunit 7            | 5,02E-05 | 5,85E-05 | 4,29E-05 | 5,34E-05 | 5,12366E-05 | 6,52682E-06 | 12,731 | 5,05E-05 | 5,91E-05 | 5,99E-05 | 5,4E-05  | 4,53E-05 | 5,37491E-05 | 6,09795E-06 | 11,345 |
| Q8VH55 | MARK1_MOUSE | Serine/threonine-protein kinase MARK1                                   | 1,49E-05 | 1,4E-05  | 1,64E-05 | 1,45E-05 | 1,49833E-05 | 1,04618E-06 | 6,982  | 1,81E-05 | 1,24E-05 | 1,63E-05 | 1,27E-05 | 1,61E-05 | 1,51218E-05 | 2,46183E-06 | 16,280 |
| Q68FL6 | SYMC_MOUSE  | Methionine-tRNA ligase, cytoplasmic                                     | 1,51E-05 | 1,6E-05  | 1,45E-05 | 1,17E-05 | 1,43176E-05 | 1,84854E-06 | 12,911 | 1,59E-05 | 1,38E-05 | 1,54E-05 | 1,51E-05 | 1,3E-05  | 1,46587E-05 | 1,20465E-06 | 8,218  |
| Q9CPX6 | ATG3_MOUSE  | Ubiquitin-like-conjugating enzyme ATG3                                  | 1,2E-05  | 1,48E-05 | 1,18E-05 | 1,56E-05 | 1,35566E-05 | 1,93604E-06 | 14,281 | 1,14E-05 | 1,24E-05 | 1,18E-05 | 1,48E-05 | 1,26E-05 | 1,25949E-05 | 1,31494E-06 | 10,440 |
| P97823 | LYP1_MOUSE  | Acyl-protein thioesterase 1                                             | 1,52E-05 | 1,65E-05 | 1,41E-05 | 1,23E-05 | 1,45225E-05 | 1,77404E-06 | 12,216 | 1,37E-05 | 1,64E-05 | 1,45E-05 | 1,14E-05 | 1,16E-05 | 1,35185E-05 | 2,07047E-06 | 15,316 |
| P62737 | ACTA_MOUSE  | #N/A                                                                    | 1,59E-05 | 2,44E-05 | 2,6E-05  | 1,43E-05 | 2,01726E-05 | 5,89155E-06 | 29,205 | 1,97E-05 | 2,98E-05 | 2,35E-05 | 1,66E-05 | 1,52E-05 | 2,09418E-05 | 5,87873E-06 | 28,072 |
| Q61301 | CTNA2_MOUSE | Catenin alpha-2                                                         | 8,64E-06 | 6,35E-06 | 6,47E-06 | 7,38E-06 | 7,20974E-06 | 1,05564E-06 | 14,642 | 9,05E-06 | 9,83E-06 | 8,7E-06  | 7,4E-06  | 7,25E-06 | 8,44631E-06 | 1,1017E-06  | 13,044 |
| P11627 | L1CAM_MOUSE | Neural cell adhesion molecule L1                                        | 0,000153 | 0,000165 | 0,000174 | 0,000154 | 0,000161454 | 1,0237E-05  | 6,340  | 0,000173 | 0,00017  | 0,000155 | 0,000143 | 0,000167 | 0,000161619 | 1,2592E-05  | 7,791  |
| Q8R052 | IQEC1_MOUSE | IQ motif and SEC7 domain-containing protein 1                           | 8,42E-05 | 9,83E-05 | 9E-05    | 0,000107 | 9,49878E-05 | 1,01322E-05 | 10,667 | 0,000111 | 9,94E-05 | 9,83E-05 | 9,74E-05 | 0,000115 | 0,000104146 | 8,06099E-06 | 7,740  |
| Q9R1P4 | PSA1_MOUSE  | Proteasome subunit alpha-type-1                                         | 0,000153 | 0,00015  | 0,00014  | 0,000153 | 0,000149057 | 6,15278E-06 | 4,128  | 0,000152 | 0,000148 | 0,000151 | 0,000126 | 0,000138 | 0,000142987 | 1,0872E-05  | 7,603  |
| Q00PI9 | HNRL2_MOUSE | Heterogeneous nuclear ribonucleoprotein U-like protein 2                | 0,000141 | 0,00014  | 0,00013  | 0,000145 | 0,000138916 | 6,54642E-06 | 4,713  | 0,000164 | 0,000151 | 0,000145 | 0,000139 | 0,000162 | 0,000151991 | 1,06187E-05 | 6,986  |
| Q3UHJ0 | AAK1_MOUSE  | AP2-associated protein kinase 1                                         | 6,55E-05 | 6,4E-05  | 6,13E-05 | 5,24E-05 | 6,08101E-05 | 5,78731E-06 | 9,599  | 6,73E-05 | 5,23E-05 | 5,83E-05 | 5,6E-05  | 6,01E-05 | 5,88189E-05 | 5,56434E-06 | 9,460  |
| Q8BG78 | PHIPL_MOUSE | Phytanoyl-CoA hydroxylase-interacting protein-like                      | 7,14E-05 | 7,25E-05 | 7,55E-05 | 7,7E-05  | 7,40968E-05 | 5,29446E-06 | 3,501  | 8,04E-05 | 7,23E-05 | 8,22E-05 | 7,39E-05 | 6,68E-05 | 7,60844E-05 | 6,11021E-06 | 8,031  |
| P23506 | PIMT_MOUSE  | Protein-L-isoaspartate(D-aspartate) O-methyltransferase                 | 3,47E-05 | 3,75E-05 | 3,55E-05 | 4,6E-05  | 3,84067E-05 | 5,20433E-06 | 13,551 | 4,35E-05 | 3,46E-06 | 4,51E-05 | 4,65E-05 | 3,66E-05 | 3,50425E-05 | 1,80658E-05 | 51,554 |
| Q9EP69 | SAC1_MOUSE  | Phosphatidylinositol phosphate SAC1                                     | 0,000108 | 0,000104 | 8,33E-05 | 8,85E-05 | 9,5988E-05  | 1,19778E-05 | 12,478 | 8,27E-05 | 9,62E-05 | 9,3E-05  | 9,15E-05 | 8,23E-05 | 8,91257E-05 | 6,3147E-06  | 7,085  |
| P28474 | ADHX_MOUSE  | Alcohol dehydrogenase class-3                                           | 5,81E-05 | 5,5E-05  | 5,58E-05 | 6,02E-05 | 5,7272E-05  | 2,35081E-06 | 4,105  | 5,92E-05 | 5,18E-05 | 4,86E-05 | 4,68E-05 | 4,64E-05 | 5,0574E-05  | 5,28119E-06 | 10,443 |
| Q9D872 | BTBDH_MOUSE | BTB/POZ domain-containing protein 17                                    | 9,21E-05 | 7,94E-05 | 6,79E-05 | 8,2E-05  | 8,03339E-05 | 9,9486E-06  | 12,384 | 0,000106 | 6,1E-05  | 8,58E-05 | 8,71E-05 | 7,98E-05 | 8,30686E-05 | 1,63365E-05 | 19,666 |
| Q8BH04 | PKCKM_MOUSE | Phosphoenolpyruvate carboxykinase [GTP], mitochondrial                  | 3,83E-05 | 4,64E-05 | 4,31E-05 | 4,57E-05 | 4,33831E-05 | 3,69515E-06 | 8,517  | 4,03E-05 | 4,12E-05 | 4,15E-05 | 4,13E-05 | 3,58E-05 | 4,08065E-05 | 7,45417E-07 | 1,827  |
| Q9CYR6 | AGM1_MOUSE  | Phosphoacetylglucosamine mutase                                         | 1,47E-05 | 1,98E-05 | 1,71E-05 | 1,98E-05 | 1,78833E-05 | 2,45954E-06 | 13,753 | 1,91E-05 | 1,84E-05 | 2,21E-05 | 2,28E-05 | 2,17E-05 | 2,08202E-05 | 1,96119E-06 | 9,420  |
| Q9DCI5 | NDUA8_MOUSE | NADH dehydrogenase [ubiquinone] 1 alpha subcomplex subunit 8            | 0,000157 | 0,000114 | 0,000138 | 0,000162 | 0,000142681 | 2,19826E-05 | 15,407 | 0,000129 | 0,000162 | 0,000153 | 0,000129 | 0,000141 | 0,000142884 | 1,49627E-05 | 10,472 |
| Q9CQI6 | COTL1_MOUSE | Coactin-like protein                                                    | 0,000224 | 0,00031  | 0,000302 | 0,000306 | 0,000285572 | 4,13525E-05 | 14,481 | 0,000219 | 0,00024  | 0,000288 | 0,000269 | 0,000251 | 0,000253257 | 2,65635E-05 | 10,489 |
| P62334 | PRS10_MOUSE | 26S protease regulatory subunit 10B                                     | 9,33E-05 | 0,000105 | 0,000109 | 0,000106 | 0,000103358 | 6,9206E-06  | 6,696  | 0,000117 | 0,00011  | 0,000116 | 0,000123 | 0,000115 | 0,000116084 | 4,46966E-06 | 3,850  |
| Q9JIL2 | AL9A1_MOUSE | 4-trimethylaminobutyraldehyde dehydrogenase                             | 8,82E-05 | 8,87E-05 | 8,38E-05 | 8,52E-05 | 8,65154E-05 | 2,36183E-06 | 2,730  | 8,01E-05 | 9,45E-05 | 9,37E-05 | 8,83E-05 | 7,67E-05 | 8,66421E-05 | 7,98811E-06 | 9,220  |
| Q9CQW1 | YKT6_MOUSE  | Synaptobrevin homolog YKT6                                              | 0,000121 | 0,00011  | 0,00012  | 0,000116 | 0,000116534 | 5,00055E-06 | 4,291  | 0,000125 | 0,000121 | 0,000116 | 8,13E-05 | 0,000103 | 0,000109217 | 1,766E-05   | 16,170 |
| P24472 | GSTA4_MOUSE | Glutathione S-transferase A4                                            | 0,000141 | 0,000153 | 0,000163 | 0,000172 | 0,000157285 | 1,36588E-05 | 8,684  | 0,000123 | 0,000161 | 0,000157 | 0,000128 | 0,000114 | 0,00013645  | 2,1353E-05  | 15,649 |
| Q80UM3 | NAA15_MOUSE | N-alpha-acetyltransferase 15, NatA auxiliary subunit                    | 1,4E-05  | 1,89E-05 | 1,56E-05 | 1,76E-05 | 1,65388E-05 | 2,16583E-06 | 13,095 | 1,75E-05 |          |          |          |          |             |             |        |

|        |             |                                                              |          |          |          |          |             |              |        |          |          |          |          |          |             |             |        |
|--------|-------------|--------------------------------------------------------------|----------|----------|----------|----------|-------------|--------------|--------|----------|----------|----------|----------|----------|-------------|-------------|--------|
| Q9QUH0 | GLRX1_MOUSE | Glutaredoxin-1                                               | 2,48E-05 | 3,48E-05 | 3,96E-05 | 3,3E-05  | 3,30636E-05 | 6,19443E-06  | 18,735 | 3,18E-05 | 3,08E-05 | 2,86E-05 | 3,57E-05 | 3,23E-05 | 3,18354E-05 | 2,58333E-06 | 8,115  |
| Q8CGP0 | H2B3B_MOUSE | Histone H2B type 3-B                                         | 3,76E-05 | 4,72E-05 | 4,52E-05 | 4,84E-05 | 4,46024E-05 | 4,86406E-06  | 10,905 | 4,2E-05  | 4,64E-05 | 5,1E-05  | 4,65E-05 | 4,22E-05 | 4,5611E-05  | 3,71354E-06 | 8,142  |
| Q9JI68 | PRAF2_MOUSE | PRA1 ubiquitin protein 2                                     | 8,67E-05 | 9,38E-05 | 9,04E-05 | 8,59E-05 | 8,92022E-05 | 3,6113E-06   | 4,048  | 8,16E-05 | 8,22E-05 | 8,2E-05  | 7,93E-05 | 8,1E-05  | 8,12143E-05 | 1,16807E-06 | 1,438  |
| P70398 | USP9X_MOUSE | Probable ubiquitin carboxyl-terminal hydrolase FAF-X         | 3,43E-05 | 4,26E-05 | 3,9E-05  | 3,97E-05 | 3,89133E-05 | 3,43887E-06  | 8,837  | 4,28E-05 | 4,14E-05 | 3,45E-05 | 3,6E-05  | 3,59E-05 | 3,81375E-05 | 3,71792E-06 | 9,749  |
| Q99K51 | PLST_MOUSE  | Plastin-3                                                    | 5,95E-05 | 5,36E-05 | 4,66E-05 | 5,53E-05 | 5,37447E-05 | 5,4026E-06   | 10,052 | 6,67E-05 | 5,53E-05 | 5,41E-05 | 4,81E-05 | 5,6E-05  | 5,60429E-05 | 6,74409E-06 | 12,034 |
| Q6P5F9 | XPO1_MOUSE  | Exportin-1                                                   | 4,71E-05 | 4,86E-05 | 4,45E-05 | 5,13E-05 | 4,78719E-05 | 2,82551E-06  | 5,902  | 4,14E-05 | 4,29E-05 | 4,57E-05 | 4,05E-05 | 5,16E-05 | 4,44325E-05 | 4,49837E-06 | 10,123 |
| P08003 | PDIA4_MOUSE | Protein disulfide-isomerase A4                               | 3,68E-05 | 3,45E-05 | 3,11E-05 | 3,77E-05 | 3,30068E-05 | 2,9314E-06   | 8,374  | 1,03E-05 | 3,39E-05 | 3,51E-05 | 2,81E-05 | 3,77E-05 | 2,90213E-05 | 1,10132E-05 | 37,949 |
| P14733 | LMNB1_MOUSE | Lamin-B1                                                     | 6,18E-05 | 6,18E-05 | 5,98E-05 | 6,53E-05 | 6,21644E-05 | 2,2987E-06   | 3,698  | 7,48E-05 | 7,17E-05 | 7,14E-05 | 7,79E-05 | 7,88E-05 | 7,49115E-05 | 3,4068E-06  | 4,548  |
| Q80XN0 | BDH_MOUSE   | D-beta-hydroxybutyrate dehydrogenase, mitochondrial          | 9,82E-05 | 0,000114 | 0,000118 | 0,000141 | 0,000117827 | 1,76285E-05  | 14,961 | 0,000117 | 0,000123 | 0,000128 | 0,000133 | 9,53E-05 | 0,000119342 | 1,47637E-05 | 12,371 |
| Q88WT1 | THIM_MOUSE  | 3-ketoacyl-CoA thiolase, mitochondrial                       | 0,000113 | 0,000113 | 0,000122 | 0,000113 | 0,000115125 | 4,33504E-06  | 3,765  | 2,27E-05 | 9,96E-05 | 0,000115 | 9,17E-05 | 0,000117 | 8,9249E-05  | 3,8676E-05  | 43,335 |
| Q8BH66 | ATLA1_MOUSE | Atlastin-1                                                   | 4,23E-05 | 4,53E-05 | 4,05E-05 | 3,71E-05 | 4,13069E-05 | 3,42243E-06  | 8,285  | 3,46E-05 | 3,68E-05 | 4,05E-05 | 3,68E-05 | 3,46E-05 | 3,6662E-05  | 2,39683E-06 | 6,538  |
| E9Q6P5 | TTC7B_MOUSE | Tetratricopeptide repeat protein 7B                          | 5,65E-05 | 5,92E-05 | 5,38E-05 | 6,42E-05 | 5,8437E-05  | 4,40346E-06  | 7,535  | 5,76E-05 | 5,06E-05 | 4,93E-05 | 6,16E-05 | 5,71E-05 | 5,52325E-05 | 5,12833E-06 | 9,285  |
| Q88447 | KLC1_MOUSE  | Kinesin light chain 1                                        | 3,16E-05 | 3,19E-05 | 2,82E-05 | 3,38E-05 | 3,1379E-05  | 2,3432E-06   | 7,467  | 3,24E-05 | 2,96E-05 | 3,1E-05  | 3,08E-05 | 2,83E-05 | 3,04261E-05 | 1,55E-06    | 5,094  |
| Q8BJY1 | PSMD5_MOUSE | 26S proteasome non-ATPase regulatory subunit 5               | 9,19E-05 | 0,000109 | 0,000102 | 9,87E-05 | 0,000100347 | 6,99473E-06  | 6,971  | 9,63E-05 | 9,76E-05 | 0,000105 | 0,000102 | 7,31E-05 | 9,48273E-05 | 1,26194E-05 | 13,308 |
| Q8QZY1 | EIF3L_MOUSE | Eukaryotic translation initiation factor 3 subunit L         | 2,97E-05 | 3,8E-05  | 3,47E-05 | 3,68E-05 | 3,47811E-05 | 3,68061E-06  | 10,582 | 2,78E-05 | 1,39E-05 | 2,75E-05 | 3,39E-05 | 2,3E-05  | 2,52037E-05 | 7,4122E-06  | 29,409 |
| Q9QX89 | DRG2_MOUSE  | Developmentally-regulated GTP-binding protein 2              | 9,12E-05 | 1E-04    | 9,7E-05  | 9,44E-05 | 9,56419E-05 | 3,75712E-06  | 3,928  | 9,03E-05 | 7,7E-05  | 8,28E-05 | 7,55E-05 | 7,24E-05 | 7,96139E-05 | 7,08251E-06 | 8,896  |
| Q8CG76 | ARK72_MOUSE | Aflatoxin B1 aldehyde reductase member 2                     | 1,7E-05  | 1,71E-05 | 1,88E-05 | 1,9E-05  | 1,79487E-05 | 1,05266E-06  | 5,865  | 1,82E-05 | 2,25E-05 | 1,94E-05 | 1,7E-05  | 1,79E-05 | 1,89773E-05 | 2,12907E-06 | 11,219 |
| Q8C8N2 | SCAI_MOUSE  | Protein SCA1                                                 | 3,29E-05 | 4,14E-05 | 3,3E-05  | 4,01E-05 | 3,68489E-05 | 4,52518E-06  | 12,280 | 4,52E-05 | 3,48E-05 | 4,51E-05 | 4,57E-06 | 5E-05    | 3,59191E-05 | 1,83736E-05 | 51,153 |
| P04925 | PRIO_MOUSE  | Major prion protein                                          | 9,5E-05  | 9,49E-05 | 8,76E-05 | 0,000108 | 9,63971E-05 | 8,4906E-06   | 8,808  | 0,000108 | 0,000108 | 0,000131 | 0,000123 | 0,000112 | 0,00011626  | 1,04192E-05 | 8,962  |
| Q8K0D5 | EFGM_MOUSE  | Elongation factor G, mitochondrial                           | 2,04E-05 | 2,23E-05 | 2,31E-05 | 1,89E-05 | 2,11555E-05 | 1,9234E-06   | 9,092  | 2,41E-05 | 2,37E-05 | 2,39E-05 | 2,3E-05  | 2,25E-05 | 2,34428E-05 | 6,58069E-07 | 2,807  |
| Q8BG73 | SH3L2_MOUSE | SH3 domain-binding glutamic acid-rich-like protein 2         | 2,55E-05 | 2,63E-05 | 3,26E-05 | 3,08E-05 | 2,88031E-05 | 3,45812E-06  | 12,006 | 2,66E-05 | 2,45E-05 | 2,72E-05 | 2,48E-05 | 2,26E-05 | 2,51386E-05 | 1,84384E-06 | 7,335  |
| P99026 | PSB4_MOUSE  | Proteasome subunit beta type-4                               | 3,95E-05 | 4,12E-05 | 4,87E-05 | 4,37E-05 | 4,32814E-05 | 3,98625E-06  | 9,210  | 5,78E-05 | 4,66E-05 | 6,98E-05 | 6,53E-05 | 6,05E-05 | 6,00155E-05 | 8,78453E-06 | 14,637 |
| Q01768 | NDKB_MOUSE  | Nucleoside diphosphate kinase B                              | 0,000135 | 0,000153 | 0,000153 | 0,000161 | 0,000150493 | 1,07189E-05  | 7,123  | 0,000132 | 0,000145 | 0,000166 | 0,000138 | 0,000131 | 0,000142413 | 1,44018E-05 | 10,113 |
| Q8C0L0 | TMX4_MOUSE  | Thioredoxin-related transmembrane protein 4                  | 9,83E-05 | 9,76E-05 | 0,000113 | 0,000108 | 0,000104262 | 7,57227E-06  | 7,263  | 9,86E-05 | 8,65E-05 | 9,68E-05 | 9,31E-05 | 9,54E-05 | 9,40606E-05 | 4,68384E-06 | 4,980  |
| P61358 | RL27_MOUSE  | 60S ribosomal protein L27                                    | 6,22E-05 | 8,58E-05 | 0,000113 | 9,34E-05 | 8,84847E-05 | 2,08231E-05  | 23,533 | 6,59E-05 | 6,71E-05 | 0,000106 | 7,2E-05  | 8,33E-05 | 7,89182E-05 | 1,67707E-05 | 21,251 |
| P61022 | CHP1_MOUSE  | Calcineurin B homologous protein 1                           | 5,98E-05 | 5,81E-05 | 5,99E-05 | 6,04E-05 | 5,9569E-05  | 8,91296E-07  | 1,647  | 6,08E-05 | 5,68E-05 | 6,46E-05 | 6,27E-05 | 4,79E-05 | 5,8744E-05  | 6,60796E-06 | 11,281 |
| Q9D007 | ARM10_MOUSE | Armadillo repeat-containing protein 10                       | 4,89E-05 | 4,34E-05 | 4,5E-05  | 4,83E-05 | 4,64199E-05 | 2,65967E-06  | 5,730  | 3,02E-06 | 4,13E-05 | 6,14E-05 | 5,64E-05 | 5,95E-05 | 4,43284E-05 | 2,44053E-05 | 55,056 |
| P62855 | RS26_MOUSE  | 40S ribosomal protein S26                                    | 2,8E-05  | 7,82E-05 | 7,8E-05  | 6,91E-05 | 6,33264E-05 | 2,3919E-05   | 37,771 | 5,58E-05 | 6,42E-05 | 6,96E-05 | 7,24E-05 | 5,1E-05  | 6,25972E-05 | 9,0724E-06  | 14,493 |
| Q6P542 | ABC1F_MOUSE | ATP-binding cassette sub-family F member 1                   | 1,56E-05 | 1,37E-05 | 1,34E-05 | 1,44E-05 | 1,42765E-05 | 9,91879E-07  | 6,948  | 1,5E-05  | 1,3E-05  | 1,25E-05 | 1,43E-05 | 1,32E-05 | 1,36079E-05 | 9,92935E-07 | 7,297  |
| Q3THW5 | H2AV_MOUSE  | Histone H2AV                                                 | 0,000145 | 0,000157 | 0,000172 | 0,000158 | 0,000158068 | 1,09608E-05  | 6,934  | 0,000157 | 0,000167 | 0,000187 | 0,000148 | 0,000161 | 0,000163865 | 1,45285E-05 | 8,866  |
| Q08530 | S1PR1_MOUSE | Sphingosine 1-phosphate receptor 1                           | 2,64E-05 | 3,24E-05 | 3,24E-05 | 3,08E-05 | 3,04744E-05 | 1,81529E-06  | 9,238  | 3,02E-05 | 3,61E-05 | 2,93E-05 | 2,81E-05 | 3,01E-05 | 3,07684E-05 | 3,08673E-06 | 10,032 |
| Q9DCP2 | S38A3_MOUSE | Sodium-coupled neutral amino acid transporter 3              | 0,000118 | 9,35E-05 | 0,000104 | 9,96E-05 | 0,000103784 | 2,103507E-05 | 9,973  | 9,55E-05 | 0,000101 | 8,45E-05 | 7,67E-05 | 8,43E-05 | 8,83854E-05 | 9,69669E-06 | 10,971 |
| Q35683 | NDUA1_MOUSE | NADH dehydrogenase [ubiquinone] 1 alpha subcomplex subunit 1 | 8,86E-05 | 0,000108 | 0,000103 | 0,000107 | 0,000101647 | 9,05206E-06  | 8,905  | 9,19E-05 | 9,09E-05 | 0,000114 | 0,000112 | 0,000104 | 0,000102543 | 1,07674E-05 | 10,500 |
| Q8BP47 | SYNC_MOUSE  | Asparagine-tRNA ligase, cytoplasmic                          | 0,000186 | 0,000239 | 0,000241 | 0,000257 | 0,000230757 | 3,10593E-05  | 13,460 | 0,000209 | 0,000156 | 0,000225 | 0,000222 | 0,000212 | 0,000204982 | 2,80508E-05 | 13,685 |
| P36916 | GNL1_MOUSE  | Guanine nucleotide-binding protein-like 1                    | 4,58E-05 | 4,79E-05 | 5,15E-05 | 4,84E-05 | 4,84065E-05 | 2,35623E-06  | 4,868  | 5,04E-05 | 4,83E-05 | 5,72E-05 | 5,59E-05 | 1,67E-05 | 4,5691E-05  | 1,66227E-05 | 36,381 |
| Q9Z2D6 | MECP2_MOUSE | Methyln-CpG-binding protein 2                                | 9,88E-05 | 0,000102 | 9,45E-05 | 8,09E-05 | 9,41358E-05 | 9,42951E-06  | 10,017 | 9,76E-05 | 0,000102 | 0,000108 | 9,34E-05 | 9,18E-05 | 9,84875E-05 | 6,55402E-06 | 6,655  |
| Q9D5V5 | CUL5_MOUSE  | Cullin-5                                                     | 3,55E-05 | 4,18E-05 | 4,16E-05 | 4,14E-05 | 4,00854E-05 | 3,05893E-06  | 7,631  | 3,55E-05 | 3,26E-05 | 3,55E-05 | 3,46E-05 | 3,98E-05 | 3,55951E-05 | 2,62567E-06 | 7,376  |
| Q8Q251 | HIBCH_MOUSE | 3-hydroxyisobutyryl-CoA hydrolase, mitochondrial             | 4,51E-05 | 5,02E-05 | 4,56E-05 | 4,94E-05 | 4,75551E-05 | 2,57391E-06  | 5,412  | 5,27E-05 | 4,88E-05 | 5,08E-05 | 5,73E-05 | 5,16E-05 | 5,22401E-05 | 3,17133E-06 | 6,071  |
| Q9WXT6 | CUL1_MOUSE  | Cullin-1                                                     | 4,72E-05 | 5,74E-05 | 4,88E-05 | 5,19E-05 | 5,13177E-05 | 4,5304E-06   | 8,828  | 4,82E-05 | 1,89E-05 | 5,42E-05 | 5,12E-05 | 5,07E-05 | 4,46223E-05 | 1,45416E-05 | 32,588 |
| P16332 | MUTA_MOUSE  | Methylmalonyl-CoA mutase, mitochondrial                      | 2,07E-05 | 2,09E-05 | 1,74E-05 | 2,2E-05  | 2,02546E-05 | 1,95905E-06  | 9,672  | 1,96E-05 | 2,26E-05 | 2,17E-05 | 2,32E-05 | 2,17E-05 | 2,17546E-05 | 1,35332E-06 | 6,221  |
| Q6NZL0 | SOGA3_MOUSE | Protein SOGA3                                                | 2,34E-05 | 2,43E-05 | 2,05E-05 | 3,37E-06 | 1,78885E-05 | 9,81474E-06  | 54,866 | 2,74E-05 | 2,75E-05 | 2,45E-05 | 2,09E-05 | 2,13E-05 | 2,43449E-05 | 3,18478E-06 | 13,082 |
| P62918 | RL8_MOUSE   | 60S ribosomal protein L8                                     | 5,95E-05 | 6,47E-05 | 6,59E-05 | 8,22E-05 | 6,80763E-05 | 9,85465E-06  | 14,476 | 6,24E-05 | 6,71E-05 | 6,81E-05 | 5,27E-05 | 4,55E-05 | 5,91713E-05 | 9,76153E-06 | 16,497 |
| Q88543 | CSN3_MOUSE  | COP9 signalosome complex subunit 3                           | 6,34E-05 | 7,68E-05 | 5,97E-05 | 7,86E-05 | 6,96253E-05 | 9,46173E-06  | 13,590 | 7,15E-05 | 6,42E-05 | 7,7E-05  | 7,23E-05 | 7,47E-05 | 7,19291E-05 | 4,85218E-06 | 6,746  |
| Q9Z2H2 | RG56_MOUSE  | Regulator of G-protein signaling 6                           | 4,52E-05 | 4,48E-05 | 4,53E-05 | 3,95E-05 | 4,37276E-05 | 2,81233E-06  | 6,431  | 5,8E-05  | 5,08E-05 | 4,66E-05 | 4,9E-05  | 4,07E-05 | 4,90196E-05 | 6,32488E-06 | 12,903 |
| P60843 | IF4A1_MOUSE | Eukaryotic initiation factor 4A-1                            | 4E-05    | 5,73E-05 | 5,92E-05 | 5,97E-05 | 5,40597E-05 | 9,43208E-06  | 17,448 | 5,89E-05 | 4,8E-05  | 5,68E-05 | 5,64E-05 | 6,52E-05 | 5,70768E-05 | 6,15531E-06 | 10,784 |
| Q9CQ13 | GMFB_MOUSE  | Glia maturation factor beta                                  | 0,000122 | 0,000142 | 0,000139 | 0,000111 | 0,00012838  | 1,45856E-05  | 11,361 | 0,000117 | 0,000125 | 0,000138 | 0,000114 | 0,000104 | 0,000119646 | 1,26183E-05 | 10,546 |
| P35980 | RL18_MOUSE  | 60S ribosomal protein L18                                    | 6,96E-05 | 0,000125 | 0,000147 | 0,000145 | 0,000121639 | 3,60759E-05  | 29,658 | 2,95E-05 | 9,39E-05 | 0,000125 | 0,00012  | 0,000117 | 9,71085E-05 | 3,96266E-05 | 40,807 |
| P70280 | VAMP7_MOUSE | Vesicle-associated membrane protein 7                        | 1,48E-05 | 1,49E-05 | 1,63E-05 | 1,75E-05 | 1,58634E-05 | 1,24585E-06  | 7,854  | 1,46E-05 | 1,15E-05 | 1,49E-05 | 1,8E-05  | 1,29E-05 | 1,43877E-05 | 2,43023E-06 | 16,891 |
| P61750 | ARF4_MOUSE  | ADP-ribosylation factor 4                                    | 4,61E-05 | 5,58E-05 | 5,89E-05 | 2,62E-05 | 4,67352E-05 | 1,47588E-05  | 31,580 | 4,32E-05 | 5,48E-05 | 6,05E-05 | 5,06E-05 | 5,29E-05 | 5,24052E-05 | 6,34461E-06 | 12,107 |
| Q9Z127 | LAT1_MOUSE  | Large neutral amino acids transporter small subunit 1        | 2,96E-05 | 3,39E-05 | 2,75E-05 | 1,51E-06 | 2,31238E-05 | 1,46546E-05  | 63,375 | 3,06E-05 | 3,07E-05 | 2,71E-05 | 2,7E-05  | 2E-05    | 2,70772E-05 | 4,34238E-06 | 16,037 |
| Q9D379 | HYEP_MOUSE  | Epoxide hydrolase 1                                          | 3,85E-05 | 4,1E-05  | 3,81E-05 | 3,63E-05 | 3,84615E-05 | 1,96879E-06  | 5,119  | 3,37E-05 | 4,13E-05 | 4,08E-05 | 3,64E-05 | 3,59E-05 | 3,76313E-05 | 3,30008E-06 | 8,770  |
| Q8VCN9 | TBCB_MOUSE  | Tubulin-specific chaperone C                                 | 1,38E-05 | 1,66E-05 | 1,62E-05 | 1,6E-05  | 1,56569E-05 | 1,24187E-06  | 7,932  | 1,67E-05 | 1,63E-05 | 1,52E-05 | 1,59E-05 | 1,       |             |             |        |



|        |             |                                                                                   |          |          |          |          |             |             |        |          |          |          |          |          |             |             |        |
|--------|-------------|-----------------------------------------------------------------------------------|----------|----------|----------|----------|-------------|-------------|--------|----------|----------|----------|----------|----------|-------------|-------------|--------|
| Q8R0F8 | FAHD1_MOUSE | Acylpyruvase FAHD1, mitochondrial                                                 | 2,61E-05 | 2,77E-05 | 2,54E-05 | 2,4E-05  | 2,57918E-05 | 1,54925E-06 | 6,007  | 2,24E-05 | 2,46E-05 | 2,5E-05  | 2,34E-05 | 2,41E-05 | 2,38974E-05 | 1,03704E-06 | 4,340  |
| P62900 | RL31_MOUSE  | 60S ribosomal protein L31                                                         | 8,36E-05 | 0,000103 | 0,0001   | 0,000103 | 9,74544E-05 | 9,35555E-06 | 9,600  | 8,73E-05 | 7,48E-05 | 8,33E-05 | 7,8E-05  | 7,05E-05 | 7,8764E-05  | 6,66498E-06 | 8,462  |
| Q8R111 | QCR9_MOUSE  | Cytochrome b-c1 complex subunit 9                                                 | 4,01E-05 | 4,47E-05 | 4,58E-05 | 3,61E-05 | 4,16892E-05 | 4,46754E-06 | 10,716 | 3,75E-05 | 3,95E-05 | 4,08E-05 | 4,58E-05 | 3,99E-05 | 4,07127E-05 | 3,08183E-06 | 7,570  |
| Q8BSL7 | ARF2_MOUSE  | ADP-ribosylation factor 2                                                         | 2,7E-05  | 3,36E-05 | 3E-05    | 2,89E-05 | 2,98929E-05 | 2,76844E-06 | 9,321  | 2,85E-05 | 1,3E-05  | 3,14E-05 | 2,89E-05 | 1,9E-05  | 2,41517E-05 | 7,82542E-06 | 32,401 |
| Q8VDD5 | MYH9_MOUSE  | Myosin-9                                                                          | 3,72E-05 | 4,44E-05 | 3,83E-05 | 4,1E-05  | 4,02327E-05 | 3,22719E-06 | 8,021  | 3,48E-05 | 3,54E-05 | 3,55E-05 | 2,92E-05 | 3,71E-05 | 3,43877E-05 | 3,00861E-06 | 8,749  |
| Q99KK7 | DPP3_MOUSE  | Dipeptidyl peptidase 3                                                            | 8,52E-05 | 7,65E-05 | 8,44E-05 | 7,38E-05 | 7,99696E-05 | 5,66164E-06 | 7,080  | 7,57E-05 | 7,34E-05 | 4,06E-05 | 7,21E-05 | 6,98E-05 | 6,63176E-05 | 1,45581E-06 | 21,952 |
| Q91WQ3 | SYYC_MOUSE  | Tyrosine--tRNA ligase, cytoplasmic                                                | 8,87E-05 | 9,14E-05 | 8,8E-05  | 8,98E-05 | 8,95033E-05 | 1,46504E-06 | 1,637  | 9,21E-05 | 8,76E-05 | 9,36E-05 | 8,67E-05 | 8,3E-05  | 8,86037E-05 | 4,31011E-06 | 4,864  |
| Q9IHR7 | IDE_MOUSE   | Insulin-degrading enzyme                                                          | 2,13E-05 | 1,62E-05 | 8,95E-06 | 1,58E-05 | 1,55813E-05 | 1,45054E-06 | 32,613 | 9,24E-06 | 1,15E-05 | 1,49E-05 | 1,21E-05 | 1,99E-05 | 1,35398E-05 | 4,0785E-06  | 30,122 |
| Q8BRT1 | CLAP2_MOUSE | CLIP-associating protein 2                                                        | 0,000148 | 0,000147 | 0,000126 | 0,000136 | 0,000139343 | 1,01137E-05 | 7,258  | 0,000133 | 0,000134 | 0,000138 | 0,000129 | 0,000137 | 0,00013432  | 3,54275E-06 | 2,638  |
| Q6R891 | NEB2_MOUSE  | Neurabin-2                                                                        | 3,68E-05 | 3,44E-05 | 3,81E-05 | 3,37E-05 | 3,57302E-05 | 2,07016E-06 | 5,794  | 3,49E-05 | 3,08E-05 | 3,52E-05 | 3,1E-05  | 3,89E-05 | 3,41593E-05 | 3,36596E-06 | 9,854  |
| P50544 | ACADV_MOUSE | Very long-chain specific acyl-CoA dehydrogenase, mitochondrial                    | 2,6E-05  | 2,31E-05 | 2,57E-05 | 2,79E-05 | 2,56761E-05 | 1,94651E-06 | 7,581  | 2,18E-05 | 2,61E-05 | 2,7E-05  | 2,68E-05 | 2,4E-05  | 2,5143E-05  | 2,22397E-06 | 8,845  |
| Q99N81 | ACS2L_MOUSE | Acetyl-coenzyme A synthetase 2-like, mitochondrial                                | 1,49E-05 | 1,63E-05 | 1,5E-05  | 1,63E-05 | 1,56528E-05 | 7,85874E-07 | 5,021  | 1,43E-05 | 1,01E-05 | 1,49E-06 | 1,27E-05 | 1,28E-05 | 1,02721E-05 | 5,14384E-06 | 50,076 |
| Q9WVJ2 | PSD13_MOUSE | 26S proteasome non-ATPase regulatory subunit 13                                   | 3,24E-05 | 2,61E-05 | 2,91E-05 | 2,74E-05 | 2,87327E-05 | 2,69496E-06 | 9,379  | 2,86E-05 | 2,56E-05 | 3,13E-05 | 2,35E-05 | 2,22E-05 | 2,62545E-05 | 3,73725E-06 | 14,235 |
| Q9R1V7 | ADA23_MOUSE | Disintegrin and metalloproteinase domain-containing protein 23                    | 0,000106 | 0,000113 | 0,000101 | 9,82E-05 | 0,000104283 | 6,42318E-06 | 6,159  | 0,000115 | 0,000109 | 0,000108 | 0,000111 | 0,000106 | 0,000109672 | 3,56395E-06 | 3,250  |
| O88487 | DC12_MOUSE  | Cytoplasmic dynein 1 intermediate chain 2                                         | 1,76E-05 | 1,79E-05 | 1,94E-05 | 1,76E-05 | 1,81452E-05 | 8,76352E-07 | 4,830  | 1,92E-05 | 1,66E-05 | 2,02E-05 | 1,32E-05 | 1,79E-05 | 1,74417E-05 | 2,72212E-06 | 15,607 |
| Q99MN1 | SYK_MOUSE   | Lysine--tRNA ligase                                                               | 3,33E-05 | 3,3E-05  | 3,31E-05 | 3,49E-05 | 3,35505E-05 | 8,8243E-07  | 2,630  | 3,9E-05  | 3,48E-05 | 3,79E-05 | 3,79E-05 | 4,22E-05 | 3,83735E-05 | 2,66182E-06 | 6,937  |
| Q3TDK6 | ROGDI_MOUSE | Protein rogd1 homolog                                                             | 6,49E-05 | 5,53E-05 | 5,85E-05 | 6,32E-05 | 6,04777E-05 | 4,3623E-06  | 7,213  | 5,54E-05 | 6,08E-05 | 5,22E-05 | 5,35E-05 | 4,83E-05 | 5,4026E-05  | 4,57904E-06 | 8,476  |
| Q8R2R9 | AP3M2_MOUSE | AP-3 complex subunit mu-2                                                         | 2,57E-05 | 6,31E-05 | 7,96E-05 | 7,34E-05 | 6,04561E-05 | 2,41304E-05 | 39,914 | 6,88E-05 | 6,06E-05 | 5,49E-05 | 7,17E-05 | 6,98E-05 | 6,51689E-05 | 7,14643E-06 | 10,966 |
| Q9CX54 | CENPV_MOUSE | Centromere protein V                                                              | 5,51E-05 | 6,63E-05 | 7,04E-05 | 6,08E-05 | 6,31743E-05 | 6,63022E-06 | 10,495 | 5,78E-05 | 5,56E-05 | 6,44E-05 | 5,75E-05 | 6,05E-05 | 5,91487E-05 | 3,3874E-06  | 5,727  |
| Q61024 | ASNS_MOUSE  | Asparagine synthetase [glutamine-hydrolyzing]                                     | 5,46E-05 | 6,63E-05 | 5,51E-05 | 6,11E-05 | 5,17613E-05 | 1,07535E-05 | 20,775 | 5,4E-05  | 4,48E-05 | 6,23E-05 | 6,31E-05 | 5,81E-05 | 5,64444E-05 | 7,46673E-06 | 13,228 |
| Q91Z31 | PTBP2_MOUSE | Poly(pyrimidine tract-binding protein 2                                           | 4,26E-05 | 3,81E-05 | 3,1E-05  | 5,06E-05 | 4,05584E-05 | 8,21228E-06 | 20,248 | 3,98E-05 | 2,95E-05 | 2,85E-05 | 3,7E-05  | 3,26E-05 | 3,34903E-05 | 4,84683E-06 | 14,472 |
| Q9DBS2 | TPRGL_MOUSE | Tumor protein p63-regulated gene 1-like protein                                   | 3,86E-05 | 3,97E-05 | 4,03E-05 | 4,59E-05 | 4,11221E-05 | 3,24289E-06 | 7,886  | 3,29E-05 | 3,29E-05 | 3,17E-05 | 3,26E-05 | 3,29E-05 | 3,25936E-05 | 5,06848E-07 | 1,555  |
| P60521 | GBRL2_MOUSE | Gamma-aminobutyric acid receptor-associated protein-like 2                        | 4,22E-05 | 4,97E-05 | 5,35E-05 | 4,59E-05 | 4,78401E-05 | 4,86576E-06 | 10,171 | 4,28E-05 | 3,5E-05  | 4,71E-05 | 4,28E-05 | 4,01E-05 | 4,15515E-05 | 4,46115E-06 | 10,736 |
| Q81110 | ATPF1_MOUSE | ATP synthase mitochondrial F1 complex assembly factor 1                           | 2,46E-05 | 2,1E-05  | 2,32E-05 | 2,51E-05 | 2,34660E-05 | 1,86061E-06 | 7,931  | 2,61E-05 | 2,28E-06 | 2,54E-05 | 2,46E-05 | 2,05E-05 | 1,97785E-05 | 1,00194E-05 | 50,658 |
| P61087 | UBE2K_MOUSE | Ubiquitin-conjugating enzyme E2 K                                                 | 0,000117 | 0,000122 | 0,000122 | 0,000129 | 0,00012324  | 4,62681E-06 | 3,782  | 0,000101 | 0,000109 | 0,000115 | 8,64E-05 | 8,3E-05  | 9,89311E-05 | 1,38754E-05 | 14,025 |
| Q9JHU9 | INO1_MOUSE  | Inositol-3-phosphate synthase 1                                                   | 4,43E-05 | 5,45E-05 | 6,4E-05  | 6,5E-05  | 5,69752E-05 | 9,6533E-06  | 16,943 | 4,21E-05 | 1,25E-06 | 4,99E-05 | 5,58E-05 | 5,39E-05 | 4,05897E-05 | 2,26113E-05 | 55,707 |
| Q61151 | 2A5E_MOUSE  | Serine/threonine-protein phosphatase 2A 56 kDa regulatory subunit epsilon isoform | 7,46E-05 | 6,02E-05 | 6,39E-05 | 6,68E-05 | 7,13749E-05 | 1,19353E-05 | 16,722 | 7,33E-05 | 8,59E-05 | 6,37E-05 | 8,57E-05 | 6,76E-05 | 7,60514E-05 | 9,20471E-06 | 12,103 |
| Q9ER16 | RDH14_MOUSE | Retinol dehydrogenase 14                                                          | 2,21E-05 | 1,93E-05 | 2,02E-05 | 2,22E-05 | 2,09497E-05 | 1,44121E-06 | 6,679  | 2,01E-05 | 2,3E-05  | 1,65E-05 | 1,65E-05 | 1,87E-05 | 1,89732E-05 | 2,71472E-06 | 14,308 |
| Q3TH69 | AASD1_MOUSE | Alanyl-tRNA editing protein Aarsd1                                                | 3,07E-05 | 2,97E-05 | 2,43E-05 | 3,33E-05 | 2,95125E-05 | 3,76616E-06 | 12,871 | 3,02E-05 | 3,23E-05 | 2,95E-05 | 3,22E-05 | 2,55E-05 | 2,99174E-05 | 2,76765E-06 | 9,251  |
| Q6P8X1 | SNX6_MOUSE  | Sorting nexin-6                                                                   | 6,76E-05 | 7,59E-05 | 6,74E-05 | 6,91E-05 | 6,9999E-05  | 4,01237E-06 | 5,732  | 6,74E-05 | 7,05E-05 | 7,42E-05 | 6,65E-05 | 7,14E-05 | 6,99873E-05 | 3,12212E-06 | 4,461  |
| Q8BP92 | RCN2_MOUSE  | Reticulocalbin-2                                                                  | 3,77E-05 | 3,95E-05 | 4,26E-05 | 3,84E-05 | 3,95534E-05 | 2,17552E-06 | 5,500  | 3,28E-05 | 4,01E-05 | 3,57E-05 | 3,15E-05 | 3,46E-05 | 3,49146E-05 | 3,29436E-06 | 9,435  |
| Q9CZM2 | RL15_MOUSE  | 60S ribosomal protein L15                                                         | 2,88E-05 | 4,57E-05 | 4,26E-05 | 5,2E-05  | 4,22675E-05 | 9,81981E-06 | 23,233 | 3,6E-05  | 3,91E-05 | 4,35E-05 | 3,15E-05 | 3,34E-05 | 3,66806E-05 | 4,74043E-06 | 12,924 |
| P63323 | RS12_MOUSE  | 40S ribosomal protein S12                                                         | 6,03E-05 | 7,07E-05 | 7,52E-05 | 6,89E-05 | 6,87459E-05 | 6,25266E-06 | 9,095  | 5,97E-05 | 6,39E-05 | 6,86E-05 | 5,91E-05 | 5,37E-05 | 6,10034E-05 | 5,60578E-06 | 9,189  |
| Q9J46  | NUDT3_MOUSE | Diphosphoinositol-polyphosphate phosphohydrolase 1                                | 2,52E-05 | 2,91E-05 | 4,35E-05 | 2,98E-05 | 3,18904E-05 | 7,98664E-06 | 25,044 | 2,17E-05 | 1,71E-05 | 2,33E-05 | 2,71E-05 | 2,29E-05 | 2,23961E-05 | 3,60142E-06 | 16,081 |
| P62748 | HPC11_MOUSE | Hippocalcin-like protein 1                                                        | 4,01E-05 | 5,64E-05 | 5,91E-05 | 6,12E-05 | 5,4215E-05  | 9,60493E-06 | 17,716 | 4,36E-05 | 4,84E-05 | 4,68E-05 | 4,62E-05 | 4,97E-05 | 4,69324E-05 | 2,29677E-06 | 4,894  |
| Q11136 | PEPD_MOUSE  | Xaa-Pro dipeptidase                                                               | 3,11E-05 | 2,79E-05 | 3,65E-05 | 4,12E-05 | 3,41608E-05 | 5,88809E-06 | 17,236 | 2,99E-05 | 2,07E-05 | 2,75E-05 | 2,57E-05 | 2,74E-05 | 2,62418E-05 | 3,44876E-06 | 13,142 |
| Q9D0M1 | KPRA_MOUSE  | Phosphoribosyl pyrophosphate synthase-associated protein 1                        | 3,25E-05 | 3E-05    | 3,16E-05 | 3,86E-05 | 3,31519E-05 | 3,74127E-06 | 11,285 | 2,98E-05 | 2,68E-05 | 2,78E-05 | 2,87E-05 | 2,6E-05  | 2,78082E-05 | 1,52066E-06 | 5,468  |
| Q3TYX3 | SMYD5_MOUSE | SET and MYND domain-containing protein 5                                          | 2,68E-05 | 2,66E-05 | 3,13E-05 | 2,78E-05 | 2,81153E-05 | 2,17315E-06 | 7,729  | 2,84E-05 | 2,8E-05  | 2,58E-05 | 2,7E-05  | 2,42E-05 | 2,66831E-05 | 1,73469E-06 | 6,501  |
| Q8BHF7 | PGPS1_MOUSE | CED-diacylglycerol--glycerol-3-phosphate 3-phosphatidyltransferase, mitochondrial | 2,17E-05 | 2,22E-05 | 1,85E-05 | 2,21E-05 | 2,11147E-05 | 1,27283E-06 | 8,187  | 2,15E-05 | 2,19E-05 | 2,56E-05 | 2,97E-05 | 2,5E-05  | 2,47485E-05 | 3,32167E-06 | 13,422 |
| P54830 | PTN5_MOUSE  | Tyrosine-protein phosphatase non-receptor type 5                                  | 4,54E-05 | 4,51E-05 | 4,64E-05 | 3,43E-05 | 4,42809E-05 | 5,70314E-06 | 13,319 | 3,44E-05 | 4,3E-05  | 4,18E-05 | 5,83E-05 | 6,85E-05 | 5,12159E-05 | 1,17526E-05 | 22,947 |
| Q9Z0L0 | TPBG_MOUSE  | Transphoblast glycoprotein                                                        | 2,53E-05 | 2,31E-05 | 2,55E-05 | 2,04E-05 | 2,3572E-05  | 2,3827E-06  | 10,108 | 2,31E-05 | 1,83E-05 | 1,78E-05 | 2,83E-05 | 2,72E-05 | 2,2944E-05  | 4,88827E-06 | 21,305 |
| P48678 | LMNA_MOUSE  | Prelamin-A/C                                                                      | 3,45E-05 | 3,46E-05 | 3,71E-05 | 3,41E-05 | 3,50628E-05 | 1,34768E-06 | 3,844  | 3,26E-05 | 3,51E-05 | 4,35E-05 | 3,6E-05  | 3,22E-05 | 3,58828E-05 | 4,52371E-06 | 12,607 |
| Q5SSL4 | ABR_MOUSE   | Active breakpoint cluster region-related protein                                  | 0,000103 | 0,00013  | 0,000122 | 0,000131 | 0,000121447 | 1,31371E-05 | 10,817 | 0,000111 | 0,000112 | 0,000122 | 0,000119 | 0,000115 | 0,000115825 | 4,32712E-06 | 3,736  |
| Q5FWK3 | RHG01_MOUSE | Rho GTPase-activating protein 1                                                   | 5,31E-05 | 4,33E-05 | 4,04E-05 | 4,33E-05 | 4,50242E-05 | 5,56518E-06 | 12,360 | 4,7E-05  | 4,45E-05 | 4,57E-05 | 5,12E-05 | 4,67E-05 | 4,70279E-05 | 2,55891E-06 | 5,441  |
| Q60631 | GRB2_MOUSE  | Growth factor receptor-bound protein 2                                            | 1,9E-05  | 1,97E-05 | 1,72E-05 | 2,01E-05 | 1,89857E-05 | 1,30109E-06 | 6,853  | 2,2E-05  | 2,07E-05 | 2,21E-05 | 2,08E-05 | 2,01E-05 | 2,11483E-05 | 8,53035E-07 | 4,034  |
| Q35678 | MGLL_MOUSE  | Monoglyceride lipase                                                              | 2,53E-05 | 3,19E-05 | 4,86E-06 | 3,26E-05 | 2,36723E-05 | 1,29578E-05 | 54,738 | 3,86E-05 | 3,54E-05 | 4,4E-05  | 3,6E-05  | 3,37E-05 | 3,75487E-05 | 3,99122E-06 | 10,629 |
| Q9WUJ2 | IF4H_MOUSE  | Eukaryotic translation initiation factor 4H                                       | 3,98E-05 | 4,25E-05 | 3,05E-05 | 2,92E-05 | 3,55063E-05 | 6,65848E-06 | 18,753 | 3,85E-05 | 4,69E-05 | 4,03E-05 | 4,23E-05 | 5,95E-05 | 4,54893E-05 | 8,42272E-06 | 18,516 |
| Q9Z110 | P5C_MOUSE   | Delta-1-pyrroline-5-carboxylate synthase                                          | 1,89E-05 | 2,2E-05  | 2,05E-05 | 1,9E-05  | 2,00962E-05 | 1,46454E-06 | 7,288  | 2,18E-05 | 2,28E-05 | 2,11E-05 | 1,96E-05 | 2,01E-05 | 2,10952E-05 | 1,26161E-06 | 5,981  |
| Q8K274 | KT3K_MOUSE  | Ketosamine-3-kinase                                                               | 4,55E-05 | 4,06E-05 | 3,96E-05 | 5,01E-05 | 4,39674E-05 | 4,83179E-06 | 10,989 | 3,66E-05 | 4,17E-05 | 4,07E-05 | 3,31E-05 | 3,19E-05 | 3,67931E-05 | 4,39464E-06 | 11,944 |
| Q62446 | FKBP3_MOUSE | Peptidyl-prolyl cis-trans isomerase FKBP3                                         | 1,29E-05 | 1,23E-05 | 1,13E-05 | 1,16E-05 | 1,20425E-05 | 6,98432E-07 | 5,800  | 1,56E-05 | 1,2E-05  | 1,42E-05 | 1,25E-05 | 1,02E-05 | 1,29159E-05 | 2,09093E-06 | 16,189 |
| Q8C5H8 | NAKD2_MOUSE | NAD kinase 2, mitochondrial                                                       | 2,1E-05  | 2,31E-05 | 1,82E-05 | 2,11E-05 | 2,08427E-05 | 2,02074E-06 | 9,695  | 1,71E-05 | 1,64E-05 | 1,91E-05 | 1,67E-05 | 1,74E-05 | 1,73436E-05 | 1,04076E-06 | 6,001  |
| Q8VE70 | PDC10_MOUSE | Progammal cell death protein 10                                                   | 3,3E-05  | 3,54E-05 | 3,62E-05 | 3,65E-05 | 3,52569E-05 |             |        |          |          |          |          |          |             |             |        |

|        |             |                                                              |          |          |          |          |             |             |        |          |          |          |          |           |             |             |        |
|--------|-------------|--------------------------------------------------------------|----------|----------|----------|----------|-------------|-------------|--------|----------|----------|----------|----------|-----------|-------------|-------------|--------|
| Q9WTR5 | CAD13_MOUSE | Cadherin-13                                                  | 6,47E-05 | 7,22E-05 | 7,77E-05 | 6,96E-05 | 7,1055E-05  | 5,44731E-06 | 7,666  | 8,31E-05 | 6,81E-05 | 6,88E-05 | 7,15E-05 | 6,62E-05  | 7,15415E-05 | 6,71556E-06 | 9,387  |
| P53986 | MOT1_MOUSE  | Monocarboxylate transporter 1                                | 2,47E-05 | 2,47E-05 | 2,13E-05 | 2,17E-05 | 2,30912E-05 | 1,86145E-06 | 8,061  | 2,53E-05 | 2,67E-05 | 2,56E-05 | 2,04E-05 | 2,33E-05  | 2,42601E-05 | 2,48087E-06 | 10,226 |
| Q3UJU9 | RMD3_MOUSE  | Regulator of microtubule dynamics protein 3                  | 4,76E-05 | 4,93E-05 | 4,75E-05 | 4,13E-05 | 4,63998E-05 | 3,52599E-06 | 7,599  | 4,13E-05 | 4,44E-05 | 3,93E-05 | 4,25E-05 | 4,26E-05  | 4,20317E-05 | 1,88448E-06 | 4,483  |
| P39054 | DYN2_MOUSE  | Dynamin-2                                                    | 1,6E-05  | 1,93E-05 | 1,63E-05 | 1,91E-05 | 1,7667E-05  | 1,77212E-06 | 10,031 | 2,39E-05 | 2,08E-05 | 2,16E-05 | 2,1E-05  | 9,85E-07  | 1,76561E-05 | 9,3975E-06  | 53,225 |
| Q8R2Y0 | ABHD6_MOUSE | Monoacylglycerol lipase ABHD6                                | 1,55E-05 | 1,29E-05 | 1,61E-05 | 1,49E-05 | 1,4825E-05  | 1,3812E-06  | 9,317  | 1,72E-05 | 1,36E-05 | 1,2E-05  | 1,28E-05 | 1,53E-05  | 1,41693E-05 | 2,07477E-06 | 14,643 |
| P30416 | FKBP4_MOUSE | Peptidyl-prolyl cis-trans isomerase FKBP4                    | 4,23E-05 | 4,43E-05 | 4,01E-05 | 3,86E-05 | 4,13204E-05 | 2,48346E-06 | 6,010  | 4,08E-05 | 4,25E-05 | 4,03E-05 | 3,84E-05 | 3,34E-05  | 3,90615E-05 | 3,50058E-06 | 8,962  |
| P46664 | PURA2_MOUSE | Adenylylsuccinate synthetase isozyme 2                       | 6,65E-05 | 7,21E-05 | 7,43E-05 | 6,86E-05 | 7,03873E-05 | 3,50141E-06 | 4,974  | 6,11E-05 | 5,9E-05  | 6,33E-05 | 6,52E-05 | 6,53E-05  | 6,27823E-05 | 2,6892E-06  | 4,283  |
| Q9CY64 | BIEA_MOUSE  | Biliverdin reductase A                                       | 6,77E-05 | 5,38E-05 | 5,05E-05 | 6,86E-05 | 6,01481E-05 | 9,37466E-06 | 15,586 | 6,43E-05 | 5,88E-05 | 7,02E-05 | 7,17E-05 | 5,94E-05  | 6,48982E-05 | 5,94878E-06 | 9,166  |
| Q6P9K8 | CSK1_MOUSE  | Caskin-1                                                     | 6,33E-05 | 7,08E-05 | 6,58E-05 | 7,14E-05 | 6,78399E-05 | 3,91059E-06 | 5,764  | 7,67E-05 | 6,9E-05  | 6,56E-05 | 5,99E-05 | 6,97E-05  | 6,81606E-05 | 6,1236E-06  | 8,984  |
| Q8R001 | MARE2_MOUSE | Microtubule-associated protein RP/EB family member 2         | 7,75E-05 | 9,61E-05 | 7,67E-05 | 9,4E-05  | 8,60664E-05 | 1,04348E-05 | 12,124 | 0,000101 | 7,41E-05 | 8,55E-05 | 8,31E-05 | 7,71E-05  | 8,41083E-05 | 1,03097E-05 | 12,258 |
| A2A432 | CUL4B_MOUSE | Cullin-4B                                                    | 6,52E-05 | 1,12E-06 | 5,93E-05 | 5,64E-05 | 4,55094E-05 | 2,98202E-05 | 65,525 | 5,34E-05 | 3,99E-05 | 4,88E-05 | 3,84E-05 | 5,18E-05  | 4,64687E-05 | 6,88223E-06 | 14,810 |
| P35505 | FAAA_MOUSE  | Fumarylacetoacetase                                          | 0,000116 | 0,000109 | 9,6E-05  | 0,000106 | 0,000106762 | 8,14164E-06 | 7,626  | 0,000113 | 4,96E-05 | 0,000101 | 8,87E-05 | 9,26E-05  | 8,89252E-05 | 2,39055E-05 | 26,883 |
| Q02357 | ANK1_MOUSE  | Ankyrin-1                                                    | 2,16E-05 | 2,17E-05 | 1,83E-05 | 2,1E-05  | 2,06723E-05 | 1,59564E-06 | 7,719  | 1,92E-05 | 2,06E-05 | 1,74E-05 | 1,57E-05 | 1,82E-05  | 1,8211E-05  | 1,85205E-06 | 10,170 |
| Q64674 | SPEE_MOUSE  | Spermidine synthase                                          | 1,07E-05 | 9,38E-06 | 7,89E-06 | 9,18E-06 | 9,29115E-06 | 1,15918E-06 | 12,476 | 1,14E-05 | 9,64E-06 | 9,85E-06 | 1,24E-05 | 9,65E-06  | 1,0596E-05  | 1,26184E-06 | 11,909 |
| P70372 | ELAV1_MOUSE | ELAV-like protein 1                                          | 7,75E-05 | 8,85E-05 | 9,15E-05 | 9,43E-05 | 8,79581E-05 | 7,34794E-06 | 8,354  | 8,4E-05  | 7,46E-05 | 7,85E-05 | 7,51E-05 | 7,57E-05  | 7,75688E-05 | 3,86885E-06 | 4,988  |
| Q5XJY5 | COPD_MOUSE  | Coatomer subunit delta                                       | 5,32E-05 | 5,48E-05 | 5,78E-05 | 5,5E-05  | 5,52204E-05 | 1,92964E-06 | 3,494  | 5,86E-05 | 4,64E-05 | 5,35E-05 | 5,8E-05  | 5,21E-05  | 5,37189E-05 | 4,93357E-06 | 9,184  |
| P20060 | HEXB_MOUSE  | Beta-hexosaminidase subunit beta                             | 4,55E-05 | 4,45E-05 | 4,61E-05 | 4,55E-05 | 4,54148E-05 | 6,7079E-07  | 1,477  | 4,53E-05 | 4,77E-05 | 4,35E-05 | 4,5E-05  | 4,11E-05  | 4,451E-05   | 2,41166E-06 | 5,418  |
| Q8K3E5 | AH1_MOUSE   | Joubertin                                                    | 1,37E-05 | 1,79E-05 | 1,62E-05 | 1,67E-05 | 1,61205E-05 | 1,75555E-06 | 10,890 | 1,23E-05 | 1,93E-05 | 1,76E-05 | 1,32E-05 | 1,42E-05  | 1,53167E-05 | 2,98853E-06 | 19,512 |
| Q9C242 | NNRD_MOUSE  | ATP-dependent (S)-NAD(P)H-hydrate dehydratase                | 3,53E-05 | 5,27E-05 | 6,29E-05 | 5,94E-05 | 5,25785E-05 | 1,22543E-05 | 23,307 | 5,93E-05 | 5,34E-05 | 5,67E-05 | 5,75E-05 | 5,75E-05  | 5,68855E-05 | 2,13484E-06 | 3,753  |
| Q9DC07 | LNEBL_MOUSE | LIM zinc-binding domain-containing Nebulette                 | 9,56E-06 | 1,26E-05 | 8,96E-06 | 1,15E-05 | 1,06549E-05 | 1,68413E-06 | 15,806 | 8,95E-06 | 1,19E-05 | 1,12E-05 | 8,92E-06 | 7,24E-06  | 9,62624E-06 | 1,87129E-06 | 19,439 |
| P54822 | PUR8_MOUSE  | Adenylylsuccinate lyase                                      | 4,77E-05 | 4,74E-05 | 4,81E-05 | 4,6E-05  | 4,72891E-05 | 8,72617E-07 | 1,845  | 4,63E-05 | 4,7E-05  | 5,02E-05 | 4,89E-05 | 4,29E-05  | 4,70746E-05 | 2,77176E-06 | 5,888  |
| Q9CY58 | PAIR8_MOUSE | Phenylsingen activator inhibitor 1 RNA-binding protein       | 3,96E-06 | 4,14E-06 | 3,09E-06 | 4,45E-06 | 3,91023E-06 | 5,81924E-07 | 14,882 | 5,59E-06 | 4,51E-06 | 4,38E-06 | 4,21E-06 | 4,2E-06   | 4,57833E-06 | 5,80337E-07 | 12,676 |
| Q8BX94 | OSBL2_MOUSE | Oxysterol-binding protein-related protein 2                  | 1,78E-05 | 4,24E-05 | 8,4E-05  | 2,12E-05 | 4,13296E-05 | 3,04277E-05 | 73,622 | 2,75E-05 | 1,84E-05 | 2,15E-05 | 3,3E-05  | 5,89E-05  | 3,18457E-05 | 1,61319E-05 | 50,657 |
| P62317 | SMD2_MOUSE  | Small nuclear ribonucleoprotein Sm D2                        | 3,3E-05  | 3,97E-05 | 4,61E-05 | 4,3E-05  | 4,04547E-05 | 5,62382E-06 | 13,902 | 3,59E-05 | 3,25E-05 | 3,82E-05 | 2,93E-05 | 3,13E-05  | 3,34437E-05 | 3,58361E-06 | 10,715 |
| Q8R191 | SGN3_MOUSE  | Synaptogyrin-3                                               | 6,96E-05 | 5,72E-05 | 6,6E-05  | 4,15E-05 | 5,8588E-05  | 1,25213E-05 | 21,372 | 5,75E-05 | 7,14E-05 | 5,91E-05 | 4,75E-05 | 4,06E-05  | 5,52237E-05 | 1,17687E-05 | 21,311 |
| Q77N79 | AKA7G_MOUSE | A-kinase anchor protein 7 isoform gamma                      | 1,59E-05 | 2,02E-05 | 1,74E-05 | 1,25E-05 | 1,64862E-05 | 3,21067E-06 | 19,475 | 1,44E-05 | 1,68E-05 | 1,71E-05 | 1,28E-05 | 1,56E-05  | 1,53322E-05 | 1,76982E-06 | 11,543 |
| P00397 | COX1_MOUSE  | Cytochrome c oxidase subunit 1                               | 7,45E-05 | 5,91E-05 | 5,31E-05 | 4,88E-05 | 5,89011E-05 | 1,12405E-05 | 19,084 | 4,82E-05 | 3,18E-05 | 3,88E-05 | 3,81E-05 | 4,72E-05  | 4,08112E-05 | 6,85707E-06 | 16,802 |
| Q8CSW0 | CLMN_MOUSE  | Calmin                                                       | 2,15E-05 | 1,77E-05 | 1,49E-05 | 2,09E-05 | 1,87688E-05 | 3,07428E-06 | 16,380 | 2,05E-05 | 1,66E-05 | 1,8E-05  | 2,02E-05 | 1,67E-05  | 1,83791E-05 | 1,84718E-06 | 10,050 |
| Q9CQ89 | CUTA_MOUSE  | Protein CutA                                                 | 6,07E-05 | 6,57E-05 | 8,71E-05 | 6,9E-05  | 7,06333E-05 | 1,15055E-05 | 16,289 | 3,99E-05 | 4,28E-06 | 5,46E-05 | 5,21E-05 | 5,06E-05  | 4,02957E-05 | 2,08991E-05 | 51,864 |
| P56379 | 68MP_MOUSE  | #N/A                                                         | 3,72E-05 | 4,3E-05  | 5,91E-05 | 3,66E-05 | 4,39819E-05 | 1,04816E-05 | 23,832 | 3,82E-05 | 4,93E-05 | 5,79E-05 | 5,63E-05 | 5,57E-05  | 5,14832E-05 | 8,11997E-06 | 15,772 |
| Q9Z0H8 | CLIP2_MOUSE | CAP-Gly domain-containing linker protein 2                   | 1,01E-05 | 9,35E-06 | 1,11E-05 | 1,03E-05 | 1,02098E-05 | 6,07933E-07 | 6,914  | 1,05E-05 | 1,11E-05 | 1,06E-05 | 2,03E-06 | 8,77E-06  | 8,61091E-06 | 3,78599E-06 | 43,967 |
| P55066 | NCAN_MOUSE  | Neurocan core protein                                        | 2,35E-05 | 2,27E-05 | 3,35E-05 | 3,5E-05  | 2,86651E-05 | 6,47711E-06 | 22,596 | 2,24E-05 | 2,02E-05 | 2E-05    | 1,57E-05 | 3,11E-05  | 2,18973E-05 | 5,69714E-06 | 26,018 |
| P16054 | KPCE_MOUSE  | Protein kinase C epsilon type                                | 0,000135 | 0,000115 | 0,000133 | 0,000142 | 0,000130938 | 1,14941E-05 | 8,778  | 0,000134 | 0,000102 | 0,000138 | 0,000129 | 0,000146  | 0,000129854 | 1,65713E-05 | 12,761 |
| Q61704 | ITH3_MOUSE  | Inter-alpha-trypsin inhibitor heavy chain H3                 | 3,02E-05 | 3,44E-05 | 2,44E-05 | 2,66E-05 | 2,89017E-05 | 4,39912E-06 | 15,221 | 2,42E-05 | 2,87E-05 | 2,3E-05  | 2,73E-05 | 2,76E-05  | 2,61512E-05 | 2,41159E-06 | 9,222  |
| Q9Z0P5 | TWF2_MOUSE  | Twinfilin-2                                                  | 5,22E-05 | 5,83E-05 | 5,57E-05 | 5,65E-05 | 5,56505E-05 | 2,56985E-06 | 4,618  | 8,16E-06 | 6,22E-05 | 5,3E-05  | 5,34E-05 | 5,82E-05  | 4,69994E-05 | 2,20397E-05 | 46,895 |
| Q9Y1I8 | HGS_MOUSE   | Hepatocyte growth factor-regulated tyrosine kinase substrate | 6,81E-05 | 5,22E-05 | 5,33E-05 | 6,79E-05 | 6,03579E-05 | 8,78687E-06 | 14,558 | 6,44E-05 | 6,14E-05 | 5,18E-05 | 4,26E-05 | 6,66E-05  | 5,73518E-05 | 1,00202E-05 | 17,471 |
| Q63912 | OMGP_MOUSE  | Oligodendrocyte-myelin glycoprotein                          | 5,37E-05 | 5,22E-05 | 6,03E-05 | 6,47E-05 | 5,77409E-05 | 5,8391E-06  | 10,113 | 4,58E-05 | 3,55E-05 | 5,28E-05 | 5,33E-05 | 6,4E-05   | 5,02733E-05 | 1,05204E-05 | 20,926 |
| Q6X893 | CTL1_MOUSE  | Choline transporter-like protein 1                           | 6,78E-05 | 7,09E-05 | 6,23E-05 | 6,52E-05 | 6,65399E-05 | 3,66068E-06 | 5,501  | 6,79E-05 | 7,23E-05 | 7,79E-05 | 7,49E-05 | 6,93E-05  | 7,24494E-05 | 4,05146E-06 | 5,592  |
| P61222 | ABCE1_MOUSE | ATP-binding cassette sub-family E member 1                   | 2,9E-05  | 3,72E-05 | 3,74E-05 | 3,63E-05 | 3,49734E-05 | 4,01171E-06 | 11,471 | 2,93E-05 | 3,13E-05 | 3,02E-05 | 3,42E-05 | 3,1E-05   | 3,1174E-05  | 1,84991E-06 | 5,934  |
| Q8BX21 | TMX3_MOUSE  | Protein disulfide-isomerase TMX3                             | 5,95E-05 | 6,28E-05 | 5,2E-05  | 5,89E-05 | 5,82882E-05 | 4,55862E-06 | 7,821  | 5,41E-05 | 3,35E-05 | 6,12E-05 | 5,62E-05 | 4,66E-05  | 5,03229E-05 | 1,0803E-05  | 21,467 |
| Q03517 | SCG2_MOUSE  | Secretogranin-2                                              | 2,15E-05 | 2,61E-05 | 1,3E-06  | 2,4E-05  | 1,82218E-05 | 1,14343E-05 | 62,751 | 1,67E-05 | 1,96E-05 | 2,34E-05 | 2,34E-05 | 2,51E-05  | 2,1644E-05  | 3,39729E-06 | 15,696 |
| Q8K221 | ARFP2_MOUSE | Arfaptin-2                                                   | 5,42E-05 | 5,29E-05 | 5,62E-05 | 5,37E-05 | 5,45232E-05 | 1,40331E-06 | 2,587  | 5,66E-05 | 4,05E-05 | 5,19E-05 | 4,57E-05 | 5,61E-05  | 5,0143E-05  | 6,94139E-06 | 13,843 |
| Q6PGN3 | DCLK2_MOUSE | Serine/threonine-protein kinase DCLK2                        | 2,67E-05 | 3,07E-05 | 1,67E-05 | 2,52E-05 | 2,48112E-05 | 5,89364E-06 | 23,754 | 3,04E-05 | 2,8E-05  | 2,77E-05 | 2,57E-05 | 2,93E-05  | 2,82279E-05 | 1,78663E-06 | 6,329  |
| Q8C854 | MYEF2_MOUSE | Myelin expression factor 2                                   | 2,43E-05 | 3,18E-05 | 3,07E-05 | 2,93E-05 | 2,90008E-05 | 3,2875E-06  | 11,336 | 3,81E-05 | 2,61E-05 | 2,92E-05 | 3,82E-05 | 3,53E-05  | 3,33783E-05 | 5,47488E-06 | 16,403 |
| F8VPU2 | FARP1_MOUSE | FERM, RhoGEF and pleckstrin domain-containing protein 1      | 3,17E-05 | 3,52E-05 | 3,49E-05 | 3,09E-05 | 3,31834E-05 | 2,18642E-06 | 6,589  | 3,42E-05 | 3,64E-05 | 3,34E-05 | 2,89E-05 | 3,13E-05  | 3,28482E-05 | 2,86673E-06 | 8,727  |
| Q8BTX9 | HSDL1_MOUSE | Inactive hydroxysteroid dehydrogenase-like protein 1         | 3,39E-05 | 4,12E-05 | 3,8E-05  | 4,37E-05 | 3,92315E-05 | 4,22463E-06 | 10,768 | 3,79E-05 | 3,71E-05 | 4,02E-05 | 3,88E-05 | 2,76E-05  | 3,63134E-05 | 4,99972E-06 | 13,768 |
| P14106 | C1QB_MOUSE  | Complement C1q subcomponent subunit B                        | 1,27E-05 | 1,34E-05 | 1,26E-05 | 1,23E-05 | 1,27616E-05 | 4,34238E-07 | 3,403  | 1,02E-05 | 1,13E-05 | 1,2E-05  | 9,69E-06 | 1,19E-05  | 1,10186E-05 | 1,04466E-06 | 9,481  |
| Q2M3X8 | PHAR1_MOUSE | Phosphatase and actin regulator 1                            | 7,86E-05 | 7,79E-05 | 8,82E-05 | 7,73E-05 | 8,05305E-05 | 5,14437E-06 | 6,388  | 4,59E-05 | 7,38E-05 | 7,92E-05 | 9,4E-05  | 9,27E-05  | 7,71275E-05 | 1,95051E-05 | 25,289 |
| Q60870 | REEP5_MOUSE | Receptor expression-enhancing protein 5                      | 1,09E-05 | 1,02E-05 | 7,19E-06 | 1,08E-05 | 9,75332E-06 | 1,73643E-06 | 17,803 | 1,15E-05 | 1,52E-05 | 1,24E-05 | 9,39E-06 | 8,45E-06  | 1,13908E-05 | 2,65887E-06 | 23,342 |
| Q69Z56 | SV2C_MOUSE  | Synaptic vesicle glycoprotein 2C                             | 3,36E-05 | 4,01E-05 | 2,75E-05 | 3,16E-05 | 3,32039E-05 | 5,25718E-06 | 15,833 | 3,97E-05 | 4,04E-05 | 3,9E-05  | 3,76E-05 | 3,42E-05  | 3,81889E-05 | 2,43507E-06 | 6,376  |
| Q9CT10 | RANB3_MOUSE | Ran-binding protein 3                                        | 6,05E-06 | 4,02E-06 | 4,76E-06 | 4,65E-06 | 4,8714E-06  | 8,54438E-07 | 17,540 | 5,39E-06 | 2,76E-06 | 5,06E-06 | 4,71E-06 | 4,154E-06 | 1,0291E-06  | 23,307      |        |
| Q9ET22 | DPP2_MOUSE  | Dipeptidyl peptidase 2                                       | 1,9E-05  | 2,13E-05 | 1,51E-05 | 2,1E-05  | 1,90914E-05 | 2,28765E-07 | 15,067 | 1,84E-05 | 1,93E-05 | 1,65E-05 | 1,72E-05 | 1,93E-05  | 1,81555E-05 | 1,246       |        |

|        |              |                                                           |          |          |          |          |             |             |        |          |          |          |          |          |             |             |        |
|--------|--------------|-----------------------------------------------------------|----------|----------|----------|----------|-------------|-------------|--------|----------|----------|----------|----------|----------|-------------|-------------|--------|
| Q92014 | NOS1_MOUSE   | Nitric oxide synthase, brain                              | 1,08E-05 | 1,44E-05 | 1,97E-05 | 1,65E-05 | 1,53419E-05 | 3,72469E-06 | 24,278 | 1,49E-05 | 1,5E-05  | 1,61E-05 | 1,45E-05 | 1,22E-05 | 1,45493E-05 | 1,40595E-06 | 9,663  |
| Q64010 | CRK_MOUSE    | Adaptor molecule crk                                      | 2,11E-06 | 4,12E-05 | 3,85E-05 | 5,6E-06  | 2,18513E-05 | 2,0856E-05  | 95,445 | 3,98E-05 | 3,2E-05  | 3,48E-05 | 4,28E-05 | 2,82E-06 | 3,04335E-05 | 1,60022E-05 | 52,581 |
| Q922Y8 | PROSC_MOUSE  | Proline synthase co-transcribed bacterial homolog protein | 1,43E-05 | 1,2E-05  | 1,82E-05 | 1,92E-05 | 1,59224E-05 | 3,37972E-06 | 21,226 | 1,45E-05 | 1,59E-05 | 1,56E-05 | 2,91E-06 | 1,61E-06 | 1,00983E-05 | 7,18808E-06 | 71,181 |
| P60122 | RUVB1_MOUSE  | RuvB-like 1                                               | 3,05E-05 | 3,37E-05 | 3,55E-05 | 3,22E-05 | 3,29548E-05 | 2,12534E-06 | 6,449  | 2,73E-05 | 2,76E-05 | 3,59E-05 | 3,06E-05 | 3,46E-05 | 3,12113E-05 | 3,95693E-06 | 12,678 |
| Q9D9V3 | ECHD1_MOUSE  | Ethylmalonyl-CoA decarboxylase                            | 6,68E-05 | 6,67E-05 | 6,01E-05 | 6,63E-05 | 6,49716E-05 | 3,2744E-06  | 5,040  | 7,06E-05 | 6,88E-05 | 6,76E-05 | 6,15E-05 | 5,65E-05 | 6,49876E-05 | 5,8706E-06  | 9,033  |
| Q77N29 | SMAAP2_MOUSE | Stromal membrane-associated protein 2                     | 6,09E-05 | 7,19E-05 | 6,97E-05 | 5,81E-05 | 6,51562E-05 | 6,70607E-06 | 10,292 | 5,68E-05 | 5,91E-05 | 5,68E-05 | 6,13E-05 | 6,66E-05 | 6,01103E-05 | 4,07322E-06 | 6,776  |
| P84084 | ARF5_MOUSE   | ADP-ribosylation factor 5                                 | 1,43E-05 | 2,26E-05 | 1,74E-05 | 2,1E-05  | 1,88313E-05 | 3,72788E-06 | 19,796 | 1,94E-05 | 2,61E-05 | 2,3E-05  | 4,93E-07 | 1,89E-05 | 1,76011E-05 | 9,99673E-06 | 56,796 |
| Q991W2 | ACY1_MOUSE   | Adenylylase-1                                             | 2,74E-05 | 2,55E-05 | 2,56E-05 | 2,69E-05 | 2,63361E-05 | 9,3078E-07  | 3,534  | 2,42E-05 | 1,71E-05 | 1,98E-05 | 2,3E-05  | 2,06E-05 | 2,09306E-05 | 2,77739E-06 | 13,270 |
| P62849 | RS24_MOUSE   | 40S ribosomal protein S24                                 | 4,09E-05 | 5,8E-05  | 6,58E-05 | 5,21E-05 | 5,41663E-05 | 1,04944E-05 | 19,374 | 4,57E-05 | 5,62E-05 | 5,75E-05 | 5,61E-05 | 4,82E-05 | 5,27086E-05 | 5,38402E-06 | 10,215 |
| O54988 | SLK_MOUSE    | STE20-like serine/threonine-protein kinase                | 3,38E-05 | 3,3E-05  | 3,34E-05 | 3,33E-05 | 3,33693E-05 | 3,13533E-07 | 0,940  | 3,25E-05 | 3,27E-05 | 3,1E-05  | 3,39E-05 | 3,78E-05 | 3,35724E-05 | 2,57535E-06 | 7,671  |
| Q88K64 | AHSA1_MOUSE  | Activator of 90 kDa heat shock protein ATPase homolog 1   | 0,000195 | 0,000224 | 0,000186 | 0,000199 | 0,00020883  | 1,61398E-05 | 8,034  | 0,000188 | 0,000191 | 0,000189 | 0,000175 | 0,000189 | 0,000186279 | 6,30343E-06 | 3,384  |
| Q99KE1 | MAOM_MOUSE   | NAD-dependent malic enzyme, mitochondrial                 | 7,67E-05 | 7,64E-05 | 7,72E-05 | 6,74E-05 | 7,44457E-05 | 4,72473E-06 | 6,347  | 8,72E-05 | 7,09E-05 | 6,93E-05 | 8,7E-05  | 8,32E-05 | 7,9517E-05  | 8,76591E-06 | 11,024 |
| Q9JIF0 | ANM1_MOUSE   | Protein arginine N-methyltransferase 1                    | 2,33E-05 | 4,43E-05 | 3,39E-05 | 4,95E-05 | 3,77643E-05 | 1,1628E-05  | 30,791 | 3,23E-06 | 2,59E-05 | 3,94E-05 | 4,68E-05 | 3,2E-05  | 2,94626E-05 | 1,66372E-05 | 56,469 |
| P54775 | PRS6B_MOUSE  | H26 protease regulatory subunit 6B                        | 2,68E-05 | 2,67E-05 | 2,98E-05 | 2,74E-05 | 2,76692E-05 | 1,44055E-06 | 5,206  | 2,63E-05 | 2,35E-05 | 2,93E-05 | 2,63E-05 | 2,78E-05 | 2,66482E-05 | 2,13919E-06 | 8,027  |
| Q3TEA8 | HP1B3_MOUSE  | Heterochromatin protein 1-binding protein 3               | 2,05E-05 | 2,62E-05 | 2,47E-05 | 2,44E-05 | 2,3962E-05  | 2,40932E-06 | 15,265 | 1,88E-05 | 2,41E-05 | 2,66E-05 | 1,64E-05 | 2,37E-05 | 2,19233E-05 | 4,19951E-06 | 19,155 |
| Q925N0 | SFXN5_MOUSE  | Sideroflexin-5                                            | 4,83E-05 | 4,03E-05 | 2,84E-05 | 4,29E-05 | 3,99726E-05 | 8,43208E-06 | 21,095 | 3,36E-05 | 5,18E-05 | 3,34E-05 | 3,12E-05 | 1,85E-05 | 3,37165E-05 | 1,18852E-05 | 35,250 |
| P62717 | RL18A_MOUSE  | 60S ribosomal protein L18a                                | 1,47E-05 | 1,7E-05  | 1,7E-05  | 1,63E-05 | 1,62347E-05 | 1,10154E-06 | 6,785  | 1,75E-05 | 1,59E-05 | 1,6E-05  | 1,4E-05  | 1,56E-05 | 1,58103E-05 | 1,2425E-06  | 7,859  |
| Q9CQ60 | 6PGL_MOUSE   | 6-phosphogluconolactonase                                 | 5,78E-05 | 6,97E-05 | 7,45E-05 | 7,58E-05 | 6,94422E-05 | 8,17479E-06 | 11,772 | 5,89E-05 | 5,73E-05 | 6,97E-05 | 5,49E-05 | 6,68E-05 | 6,15211E-05 | 6,39876E-06 | 10,401 |
| O09167 | RL21_MOUSE   | 60S ribosomal protein L21                                 | 7,84E-05 | 8,48E-05 | 7,83E-05 | 8,13E-05 | 8,06704E-05 | 3,02920E-06 | 3,833  | 6,73E-05 | 6,49E-05 | 6,42E-05 | 6,78E-05 | 6,17E-05 | 6,51744E-05 | 2,45248E-06 | 3,763  |
| Q8VDP4 | CCAR2_MOUSE  | Cell cycle and apoptosis regulator protein 2              | 2,01E-05 | 2,55E-05 | 2,38E-05 | 2,67E-05 | 2,40461E-05 | 2,89789E-06 | 11,973 | 2,47E-05 | 2,21E-05 | 2,38E-05 | 2,4E-05  | 2,51E-05 | 2,40624E-05 | 1,15481E-06 | 4,799  |
| Q9CQ69 | QCR8_MOUSE   | Cytochrome b-c1 complex subunit 8                         | 0,000237 | 0,000273 | 0,000277 | 0,000239 | 0,000256637 | 2,11884E-05 | 8,256  | 0,000198 | 0,000241 | 0,000252 | 0,000217 | 0,000222 | 0,000225864 | 2,10575E-05 | 9,323  |
| Q8BMG7 | RBGPR_MOUSE  | Rab3 GTPase-activating protein non-catalytic subunit      | 6,48E-05 | 7,92E-05 | 7,42E-05 | 7,14E-05 | 7,2376E-05  | 6,03271E-06 | 8,355  | 7,31E-05 | 6,68E-05 | 7,58E-05 | 7,12E-05 | 7,14E-05 | 7,16717E-05 | 3,28563E-06 | 4,584  |
| Q91W50 | CSDE1_MOUSE  | Cold shock domain-containing protein E1                   | 4,57E-05 | 4,67E-05 | 3,96E-05 | 4,52E-05 | 4,43194E-05 | 3,18255E-06 | 7,181  | 4,45E-05 | 3,93E-05 | 4,38E-05 | 4,58E-05 | 4,87E-05 | 4,44285E-05 | 3,40607E-06 | 7,666  |
| Q8CIE6 | COPA_MOUSE   | Coatomer subunit alpha                                    | 3,94E-05 | 4,08E-05 | 4,75E-05 | 4,38E-05 | 4,2895E-05  | 3,57584E-06 | 8,336  | 4,25E-05 | 4,33E-05 | 3,42E-05 | 1,81E-06 | 4,23E-05 | 3,28242E-05 | 1,77249E-05 | 53,999 |
| O35685 | NUDC_MOUSE   | Nuclear migration protein nudC                            | 2,82E-05 | 2,78E-05 | 2,56E-05 | 2,51E-05 | 2,66536E-05 | 1,5664E-06  | 5,877  | 2,79E-05 | 3,08E-05 | 3,02E-05 | 2,6E-05  | 2,38E-05 | 2,77239E-05 | 2,90644E-06 | 10,484 |
| P61164 | ACTZ_MOUSE   | Alpha-centractin                                          | 0,000159 | 0,000169 | 0,000121 | 0,000158 | 0,000151705 | 2,10609E-05 | 13,883 | 0,000174 | 0,00017  | 0,00015  | 0,00015  | 0,000146 | 0,000157892 | 1,28899E-05 | 8,164  |
| P62281 | RS11_MOUSE   | 40S ribosomal protein S11                                 | 1,04E-05 | 9,71E-06 | 1,26E-05 | 1,1E-05  | 1,09292E-05 | 1,20918E-06 | 11,064 | 8,65E-06 | 1,15E-05 | 1,2E-05  | 1,01E-05 | 1,11E-05 | 1,10811E-05 | 1,95695E-06 | 17,660 |
| Q9QZM0 | UBQL2_MOUSE  | Ubiquilin-2                                               | 4,47E-05 | 5,25E-05 | 5,27E-05 | 5,58E-05 | 5,14351E-05 | 4,74907E-06 | 9,233  | 4,25E-05 | 4,06E-05 | 4,01E-05 | 4,1E-05  | 5,03E-05 | 4,28908E-05 | 4,22118E-06 | 9,842  |
| P97390 | VPS45_MOUSE  | Vacuolar protein sorting-associated protein 45            | 1,64E-05 | 2,12E-05 | 1,72E-05 | 1,85E-05 | 1,83437E-05 | 2,11477E-06 | 11,529 | 1,77E-05 | 1,74E-05 | 1,49E-05 | 1,6E-05  | 2,02E-05 | 1,72607E-05 | 2,01258E-06 | 11,660 |
| Q14B12 | GRM2_MOUSE   | Metabotropic glutamate receptor 2                         | 2,25E-05 | 2,18E-05 | 2,7E-05  | 2,76E-05 | 2,47176E-05 | 3,00943E-06 | 12,175 | 3,14E-05 | 2,04E-05 | 2,17E-05 | 2,45E-05 | 3,28E-05 | 2,61685E-05 | 5,6604E-06  | 21,631 |
| O09131 | GSTO1_MOUSE  | Glutathione S-transferase omega-1                         | 1,68E-05 | 1,92E-05 | 1,72E-05 | 1,92E-05 | 1,8103E-05  | 1,28782E-06 | 7,114  | 1,71E-05 | 1,66E-05 | 1,85E-05 | 2,02E-05 | 1,86E-05 | 1,81938E-05 | 1,4157E-06  | 7,781  |
| Q92051 | BPNT1_MOUSE  | 3(2''),5'-bisphosphate nucleotidase 1                     | 2,04E-05 | 2,27E-05 | 2,52E-05 | 2,63E-05 | 2,36457E-05 | 2,6166E-06  | 11,066 | 2,41E-05 | 1,91E-05 | 2,41E-05 | 3,04E-05 | 2,37E-05 | 2,43054E-05 | 4,02489E-06 | 16,560 |
| P61021 | RAB5B_MOUSE  | Ras-related protein Rab-5B                                | 1,1E-05  | 1,12E-05 | 1,03E-05 | 1,02E-05 | 1,06652E-05 | 5,38963E-07 | 5,053  | 1,09E-05 | 1,29E-05 | 1,31E-05 | 1,07E-05 | 7,39E-06 | 1,09915E-05 | 2,29331E-06 | 20,864 |
| Q80Z11 | RAP2A_MOUSE  | Ras-related protein Rap-2a                                | 1,92E-05 | 1,9E-05  | 2,15E-05 | 2E-05    | 1,99266E-05 | 1,13886E-06 | 5,715  | 2,14E-05 | 1,18E-05 | 1,74E-05 | 1,5E-05  | 1,17E-05 | 1,54501E-05 | 4,06264E-06 | 26,295 |
| P21995 | EMB_MOUSE    | Emagin                                                    | 3,8E-05  | 4,29E-05 | 3,7E-05  | 4,17E-05 | 3,99325E-05 | 2,83319E-06 | 7,095  | 4,22E-05 | 4,06E-05 | 4,45E-05 | 3,95E-05 | 4,42E-05 | 4,22081E-05 | 2,16627E-06 | 5,132  |
| Q8BK08 | TMM11_MOUSE  | Transmembrane protein 11, mitochondrial                   | 3,28E-05 | 2,97E-05 | 3,04E-05 | 3,03E-05 | 3,08164E-05 | 1,35102E-06 | 4,384  | 2,63E-05 | 2,94E-05 | 2,89E-05 | 2,34E-05 | 3,01E-05 | 2,76272E-05 | 2,73715E-06 | 9,907  |
| Q8VE62 | PAIP1_MOUSE  | Polysadenylate-binding protein-interacting protein 1      | 3,84E-05 | 4,29E-05 | 4,57E-05 | 4,53E-05 | 4,3068E-05  | 3,36752E-06 | 7,819  | 3,55E-05 | 3,61E-05 | 3,79E-05 | 3,35E-05 | 4,67E-05 | 3,79796E-05 | 5,14206E-06 | 13,539 |
| P62609 | UBP46_MOUSE  | Ubiquitin carboxyl-terminal hydrolase 46                  | 3,02E-05 | 2,77E-05 | 3,64E-05 | 2,99E-05 | 3,10585E-05 | 3,74547E-06 | 12,059 | 2,81E-05 | 2,35E-05 | 3,23E-05 | 2,56E-05 | 2,88E-05 | 2,76678E-05 | 3,33169E-06 | 12,042 |
| P70188 | KIFA3_MOUSE  | Kinesin-associated protein 3                              | 5,67E-05 | 5,6E-05  | 5,6E-05  | 4,99E-05 | 5,46284E-05 | 3,19866E-06 | 5,855  | 5,29E-05 | 4,9E-05  | 5,87E-05 | 4,2E-05  | 4,94E-05 | 5,03951E-05 | 6,09439E-06 | 12,093 |
| Q8R1N4 | NUDC3_MOUSE  | NudC domain-containing protein 3                          | 2,48E-05 | 1,77E-05 | 2,64E-05 | 2,48E-05 | 2,34588E-05 | 3,88756E-06 | 16,672 | 1,62E-05 | 1,23E-05 | 1,82E-05 | 1,59E-05 | 1,34E-05 | 1,52127E-05 | 2,3683E-06  | 15,568 |
| Q8BHK1 | NIP1A_MOUSE  | #N/A                                                      | 7,02E-06 | 6,84E-06 | 4,56E-06 | 5,8E-06  | 6,05564E-06 | 1,13041E-06 | 18,567 | 5,58E-06 | 6,9E-06  | 6,13E-06 | 4,39E-06 | 3,39E-06 | 5,27721E-06 | 1,39488E-06 | 26,432 |
| Q04690 | NF1_MOUSE    | Neurofibromin                                             | 6,02E-05 | 8,67E-05 | 8,1E-05  | 8,52E-05 | 7,82832E-05 | 1,23066E-05 | 15,721 | 8,22E-05 | 6,75E-05 | 8,18E-05 | 8,54E-05 | 8,43E-05 | 8,02556E-05 | 7,26118E-06 | 9,048  |
| A2AL55 | RPGP1_MOUSE  | Rap1 GTPase-activating protein 1                          | 6,86E-05 | 7,05E-05 | 7,2E-05  | 7,23E-05 | 7,08642E-05 | 1,70381E-06 | 2,404  | 7,19E-05 | 7,68E-05 | 2,58E-05 | 6,14E-05 | 7,08E-05 | 6,13383E-05 | 2,06186E-05 | 33,615 |
| Q8CHP8 | PGP_MOUSE    | Gamma-3-phosphate phosphatase                             | 2,28E-05 | 2,07E-05 | 2,36E-05 | 2,97E-05 | 2,41914E-05 | 3,86753E-06 | 15,987 | 2,66E-05 | 2,4E-05  | 2,8E-05  | 2,92E-05 | 2,51E-05 | 2,65857E-05 | 2,04858E-06 | 7,880  |
| P62751 | RL23A_MOUSE  | 60S ribosomal protein L23a                                | 6,42E-05 | 7,22E-05 | 6,22E-05 | 6,75E-05 | 6,64956E-05 | 4,36745E-06 | 6,568  | 4,22E-05 | 6,41E-05 | 6,36E-05 | 6,43E-05 | 6,52E-05 | 5,98969E-05 | 9,90577E-06 | 16,538 |
| Q99MN9 | PCCB_MOUSE   | Propionyl-CoA carboxylase beta chain, mitochondrial       | 6,91E-07 | 1,5E-05  | 1,85E-05 | 1,73E-05 | 1,2856E-05  | 8,24157E-06 | 64,107 | 1,63E-05 | 1,45E-05 | 1,63E-05 | 1,55E-05 | 1,55E-05 | 1,56091E-05 | 7,15501E-07 | 4,584  |
| Q9DC53 | MECR_MOUSE   | Trans-2-enoyl-CoA reductase, mitochondrial                | 2,59E-05 | 3,06E-05 | 2,63E-05 | 2,95E-05 | 2,80824E-05 | 2,34491E-06 | 8,350  | 2,66E-05 | 2,39E-05 | 2,14E-05 | 1,68E-05 | 1,95E-05 | 2,16116E-05 | 3,80922E-06 | 17,626 |
| Q80TT2 | BAlP3_MOUSE  | BAl1-associated protein 3                                 | 2,02E-05 | 2,36E-05 | 2,22E-05 | 2,32E-05 | 2,23187E-05 | 1,52145E-06 | 6,817  | 1,9E-05  | 2,36E-05 | 2,12E-05 | 1,95E-05 | 2,31E-05 | 2,12764E-05 | 2,03951E-06 | 9,586  |
| Q91VF2 | HNMT_MOUSE   | Histamine N-methyltransferase                             | 6,25E-05 | 5,33E-05 | 4,89E-05 | 4,85E-05 | 5,33076E-05 | 6,48781E-06 | 12,171 | 5,53E-05 | 5,65E-05 | 5,5E-05  | 4,33E-05 | 4E-05    | 5,00362E-05 | 7,72397E-06 | 15,437 |
| P62746 | RHOB_MOUSE   | Rho-related GTP-binding protein RhoB                      | 3,52E-05 | 2,98E-05 | 3,99E-05 | 4,06E-05 | 3,63847E-05 | 5,02954E-06 | 13,823 | 2,74E-05 | 3,67E-06 | 3,54E-05 | 2,94E-05 | 3,43E-05 | 2,60409E-05 | 1,29306E-05 | 49,655 |
| Q3UVL4 | VPS51_MOUSE  | Vacuolar protein sorting-associated protein 51 homolog    | 2,71E-05 | 3,18E-05 | 2,95E-05 | 3,17E-05 | 3,00263E-05 | 2,19697E-06 | 7,317  | 2,95E-05 | 2,57E-05 | 2,97E-05 | 2,43E-05 | 3,58E-05 | 2,89751E-05 | 4,45069E-06 | 15,360 |
| P62245 | RS15A_MOUSE  | 40S ribosomal protein S15a                                | 2,25E-05 | 2,66E-05 | 2,44E-05 | 2,35E-05 | 2,42451E-05 | 1,78048E-06 | 7,344  | 2,58E-05 | 2,47E-05 | 2,75E-05 | 2,25E-05 | 2,       |             |             |        |

|        |             |                                                                         |          |          |          |          |              |             |        |          |          |          |          |          |             |             |        |
|--------|-------------|-------------------------------------------------------------------------|----------|----------|----------|----------|--------------|-------------|--------|----------|----------|----------|----------|----------|-------------|-------------|--------|
| P43276 | H15_MOUSE   | Histone H1.5                                                            | 5,56E-05 | 5,46E-05 | 6,42E-05 | 6,82E-05 | 6,06462E-05  | 6,60487E-06 | 10,891 | 5,89E-05 | 6,9E-05  | 6,62E-05 | 6,05E-05 | 7,08E-05 | 6,50549E-05 | 5,19518E-06 | 7,986  |
| Q8BL65 | ABL2_MOUSE  | Actin-binding LIM protein 2                                             | 3,3E-05  | 3,12E-05 | 3,79E-05 | 3,38E-05 | 3,39975E-05  | 2,83996E-06 | 8,353  | 3,26E-05 | 3,43E-05 | 3,27E-05 | 2,97E-05 | 3,15E-05 | 3,21534E-05 | 1,71225E-06 | 5,325  |
| Q8QZRS | ALAT1_MOUSE | Alanine aminotransferase 1                                              | 2,45E-05 | 2,26E-05 | 2,45E-05 | 2,35E-05 | 2,37732E-05  | 9,21481E-07 | 3,876  | 2,27E-05 | 1,34E-05 | 2,18E-05 | 2,18E-05 | 1,96E-05 | 1,98624E-05 | 3,77596E-06 | 19,011 |
| Q8CA71 | SHSA4_MOUSE | Protein shisa-4                                                         | 4,42E-05 | 3,96E-05 | 4,66E-05 | 4,6E-05  | 4,40996E-05  | 3,16883E-06 | 7,186  | 3,54E-05 | 3,82E-05 | 3,56E-05 | 3,35E-05 | 2,84E-05 | 3,42229E-05 | 3,66445E-06 | 10,708 |
| Q7TPR4 | ACTN1_MOUSE | Alpha-actinin-1                                                         | 1,94E-05 | 2,43E-05 | 3,86E-05 | 2,91E-05 | 2,78858E-05  | 8,1603E-06  | 29,292 | 3,55E-05 | 2,76E-05 | 3,47E-05 | 3,41E-06 | 5,56E-05 | 3,13708E-05 | 1,87953E-05 | 59,913 |
| Q6P5E4 | UGGG1_MOUSE | UDP-glucose-glycoprotein glucosyltransferase 1                          | 4,78E-06 | 5,68E-06 | 5,49E-06 | 4,13E-06 | 5,02133E-06  | 7,09692E-07 | 14,134 | 4,63E-06 | 5,12E-06 | 4,43E-06 | 4,75E-06 | 2,85E-06 | 4,35736E-06 | 8,77921E-07 | 20,148 |
| Q80UG2 | PLX4_MOUSE  | Plexin-A4                                                               | 5,75E-06 | 1,07E-05 | 1,16E-05 | 1E-05    | 9,51194E-06  | 2,58341E-06 | 27,160 | 9,55E-06 | 8,51E-06 | 9,94E-06 | 9,6E-06  | 2,32E-07 | 7,56628E-06 | 4,13476E-06 | 54,647 |
| Q08759 | UBE3A_MOUSE | Ubiquitin-protein ligase E3A                                            | 2,73E-05 | 4,17E-05 | 2,83E-05 | 4,33E-05 | 3,51312E-05  | 8,52036E-06 | 24,253 | 3,18E-05 | 3,89E-05 | 3,9E-05  | 3,8E-05  | 3,61E-05 | 3,6771E-05  | 3,00083E-06 | 8,161  |
| P70206 | PLX1_MOUSE  | Plexin-A1                                                               | 1,55E-05 | 1,83E-05 | 1,77E-05 | 2,38E-05 | 1,88202E-05  | 3,51316E-06 | 18,667 | 2,01E-05 | 1,87E-05 | 1,74E-05 | 2,01E-05 | 2,06E-05 | 1,93919E-05 | 1,3255E-06  | 6,835  |
| D3YVF0 | AKAP5_MOUSE | A-kinase anchor protein 5                                               | 6,7E-06  | 4,52E-06 | 1,42E-05 | 9,15E-06 | 8,63539E-06  | 4,14476E-06 | 47,997 | 8,92E-06 | 8,03E-06 | 7,88E-06 | 8,42E-06 | 1,73E-05 | 1,01095E-05 | 4,03283E-06 | 39,892 |
| Q8CHT0 | AL4A1_MOUSE | Delta-1-pyrroline-5-carboxylate dehydrogenase, mitochondrial            | 3,65E-05 | 4,47E-05 | 4,79E-05 | 4,21E-05 | 4,28008E-05  | 4,83041E-06 | 11,286 | 1,56E-05 | 5,51E-05 | 4,75E-05 | 4,86E-05 | 4,43E-05 | 4,22366E-05 | 1,53811E-05 | 36,416 |
| Q6GQT9 | NOMO1_MOUSE | Nodal modulator 1                                                       | 3,06E-05 | 3,24E-05 | 3,07E-05 | 3,36E-05 | 3,17913E-05  | 1,4624E-06  | 4,600  | 2,92E-05 | 2,48E-05 | 2,7E-05  | 3,64E-06 | 2,92E-05 | 2,27591E-05 | 1,08427E-05 | 47,641 |
| Q60902 | EP15R_MOUSE | Epidermal growth factor receptor substrate 15-like 1                    | 1,41E-05 | 1,83E-05 | 2,19E-05 | 1,79E-05 | 1,8035E-05   | 3,19251E-06 | 17,702 | 2,02E-05 | 1,55E-05 | 1,82E-05 | 1,38E-05 | 1,72E-05 | 1,69787E-05 | 2,44706E-06 | 14,413 |
| P47791 | GSHR_MOUSE  | Glutathione reductase, mitochondrial                                    | 4,95E-05 | 3,57E-05 | 3,76E-05 | 4,56E-05 | 4,21039E-05  | 6,54995E-06 | 15,557 | 3,06E-05 | 4,15E-05 | 4,6E-05  | 4E-05    | 4,4E-05  | 4,04373E-05 | 5,98371E-06 | 14,797 |
| P28661 | SEPT4_MOUSE | Septin-4                                                                | 1,63E-05 | 1,37E-05 | 1,29E-05 | 1,5E-06  | 1,10704E-05  | 6,54197E-06 | 59,094 | 1,73E-05 | 1,18E-05 | 1,36E-05 | 1,14E-05 | 1,43E-05 | 1,36726E-05 | 2,37498E-06 | 17,370 |
| Q8BNW9 | KBTBB_MOUSE | Kelch repeat and BTB domain-containing protein 11                       | 2,12E-05 | 2,13E-05 | 1,52E-05 | 2,16E-05 | 1,982E-05    | 3,10977E-06 | 15,690 | 1,46E-05 | 1,53E-05 | 1,78E-05 | 1,77E-05 | 2,46E-05 | 1,79832E-05 | 3,97486E-06 | 22,103 |
| Q8BIW1 | PRUNE_MOUSE | Protein prune homolog                                                   | 1,76E-05 | 1,75E-05 | 2,07E-05 | 1,71E-05 | 1,82373E-05  | 1,65941E-06 | 9,099  | 1,46E-05 | 1,85E-05 | 1,96E-05 | 1,75E-05 | 2,05E-05 | 1,81387E-05 | 2,30341E-06 | 12,699 |
| Q505F5 | LRC47_MOUSE | Leucine-rich repeat-containing protein 47                               | 5,3E-06  | 4,38E-06 | 3,92E-06 | 4,77E-06 | 4,59194E-06  | 5,84615E-07 | 12,731 | 4,62E-06 | 8,94E-07 | 4,66E-06 | 3,8E-06  | 4,4E-06  | 3,67596E-06 | 1,59227E-06 | 43,316 |
| Q05B3C | EMAL1_MOUSE | Echinoderm microtubule-associated protein-like 1                        | 1,67E-05 | 1,27E-05 | 1,3E-05  | 1,51E-05 | 1,43873E-05  | 1,85063E-06 | 12,863 | 2,22E-05 | 1,85E-05 | 1,9E-05  | 1,61E-05 | 1,7E-05  | 1,85416E-05 | 2,37693E-06 | 12,819 |
| Q80WM4 | HPLN4_MOUSE | Hyaluronan and proteoglycan link protein 4                              | 2,29E-05 | 3,04E-05 | 2,59E-05 | 2,83E-05 | 2,68813E-05  | 3,24132E-06 | 12,058 | 2,37E-05 | 2,86E-05 | 2,83E-05 | 2,72E-05 | 2,46E-05 | 2,64811E-05 | 2,2146E-06  | 8,351  |
| Q3V0K9 | PLS1_MOUSE  | Plastin-1                                                               | 1,05E-05 | 1,09E-05 | 9,74E-06 | 7,58E-06 | 9,69481E-06  | 1,4956E-06  | 15,427 | 8,08E-06 | 6,64E-06 | 8,08E-06 | 6,76E-06 | 6,36E-06 | 7,18586E-06 | 8,2962E-07  | 11,545 |
| A2RT62 | FXL1_MOUSE  | F-box/LRR-repeat protein 16                                             | 6,49E-05 | 5,84E-05 | 7,08E-05 | 6,29E-05 | 6,42429E-05  | 5,16585E-06 | 18,041 | 5,14E-05 | 4,87E-05 | 5,63E-05 | 5,94E-05 | 6,6E-05  | 5,63478E-05 | 6,79258E-06 | 12,055 |
| Q8CBY8 | DCTN4_MOUSE | Dynactin subunit 4                                                      | 3,89E-05 | 4,43E-05 | 4,09E-05 | 3,9E-05  | 4,07883E-05  | 2,54267E-06 | 6,234  | 4,72E-05 | 4,26E-05 | 9,9E-06  | 3,72E-05 | 4,05E-05 | 3,54839E-05 | 1,47595E-05 | 41,595 |
| Q56A07 | SCN2B_MOUSE | Sodium channel subunit beta-2                                           | 8,19E-05 | 7,34E-05 | 8,25E-05 | 7,59E-05 | 7,84482E-05  | 4,47409E-06 | 5,703  | 7,03E-05 | 6,46E-05 | 6,89E-05 | 5,85E-05 | 6,12E-05 | 6,47193E-05 | 4,99133E-06 | 7,712  |
| Q9JIU8 | SH3L1_MOUSE | SH3 domain-binding glutamic acid-rich-like protein                      | 1,5E-05  | 2,16E-05 | 2,32E-05 | 2,33E-05 | 2,07626E-05  | 3,89905E-06 | 18,736 | 1,41E-05 | 1,69E-05 | 2,32E-05 | 1,41E-05 | 1,67E-05 | 1,6403E-05  | 2,48435E-06 | 15,146 |
| Q3UNZ8 | QORL2_MOUSE | Quinone oxidoreductase-like protein 2                                   | 3,1E-05  | 3E-05    | 8,53E-06 | 3,12E-05 | 2,51844E-05  | 1,11131E-05 | 44,127 | 2,88E-05 | 3,21E-05 | 2,52E-05 | 2,74E-05 | 2,83E-05 | 2,8365E-05  | 2,50276E-06 | 8,823  |
| P63330 | PP2AA_MOUSE | Serine/threonine-protein phosphatase 2A catalytic subunit alpha isoform | 0,000569 | 0,000567 | 0,000641 | 0,000683 | 0,000644993  | 5,68356E-05 | 9,242  | 0,000614 | 0,000588 | 0,000582 | 0,00058  | 0,000535 | 0,000579677 | 2,8682E-05  | 4,948  |
| P62984 | RL40_MOUSE  | #N/A                                                                    | 0,001245 | 0,001498 | 0,001377 | 0,001283 | 0,001350617  | 0,000112929 | 8,361  | 0,001358 | 0,001226 | 0,001113 | 0,001199 | 0,001277 | 0,001234659 | 9,10429E-05 | 7,374  |
| P37040 | NCPR_MOUSE  | NADPH-cytochrome P450 reductase                                         | 0,000107 | 0,000124 | 9,57E-05 | 0,000107 | 0,000108461  | 1,1509E-05  | 10,611 | 7,61E-05 | 0,000117 | 0,000121 | 0,000132 | 0,000128 | 0,000115015 | 2,24847E-05 | 15,549 |
| Q9WUL7 | ARL3_MOUSE  | ADP-ribosylation factor-like protein 3                                  | 0,000108 | 0,000121 | 0,000116 | 9,36E-05 | 0,000109561  | 1,20296E-05 | 10,980 | 0,000125 | 0,000106 | 0,000109 | 0,000117 | 9,69E-05 | 0,000110894 | 1,07351E-05 | 9,680  |
| Q99JR1 | SFXN1_MOUSE | Sideroflexin-1                                                          | 0,00022  | 0,000215 | 0,000222 | 0,000204 | 0,000215309  | 7,871E-06   | 3,656  | 0,000183 | 0,000201 | 0,00021  | 0,000202 | 0,000189 | 0,000196909 | 1,07155E-05 | 5,442  |
| P34884 | MIF_MOUSE   | Macrophage migration inhibitory factor                                  | 0,000417 | 0,000544 | 0,000653 | 0,000655 | 0,000544729  | 9,72526E-05 | 17,853 | 0,00043  | 0,000597 | 0,000561 | 0,000589 | 0,000581 | 0,000551663 | 6,93982E-05 | 12,580 |
| Q9CPQ8 | ATP5L_MOUSE | ATP synthase subunit g, mitochondrial                                   | 5,9E-05  | 6,95E-05 | 7,92E-05 | 6,07E-05 | 6,70944E-05  | 9,30299E-06 | 13,866 | 4,91E-05 | 6,23E-05 | 7,07E-05 | 5,7E-05  | 6,11E-05 | 6,00452E-05 | 7,90774E-06 | 13,170 |
| Q78IK2 | USMG5_MOUSE | Up-regulated during skeletal muscle growth protein 5                    | 0,000262 | 0,000289 | 0,000356 | 0,000287 | 0,000298385  | 4,00537E-05 | 13,423 | 0,000227 | 0,000264 | 0,000283 | 0,000252 | 0,000242 | 0,00025384  | 2,13322E-05 | 8,404  |
| P27048 | RSMB_MOUSE  | #N/A                                                                    | 6,77E-05 | 7,77E-05 | 7,83E-05 | 7,78E-05 | 7,53841E-05  | 5,10023E-06 | 6,766  | 6,69E-05 | 6,39E-05 | 7,47E-05 | 6,61E-05 | 6,64E-05 | 6,75838E-05 | 4,12537E-06 | 6,104  |
| Q8R1B4 | EIF3C_MOUSE | Eukaryotic translation initiation factor 3 subunit C                    | 3,52E-05 | 4,38E-05 | 3,8E-05  | 3,89E-05 | 3,89559E-05  | 3,56476E-06 | 9,151  | 4,27E-05 | 3,6E-05  | 4,09E-05 | 3,56E-05 | 3,76E-05 | 3,8574E-05  | 3,11771E-06 | 8,082  |
| P84104 | SRSF3_MOUSE | Serine/arginine-rich splicing factor 3                                  | 0,000124 | 0,000176 | 0,000176 | 0,000174 | 0,000162326  | 2,55465E-05 | 15,738 | 0,000149 | 0,000154 | 0,000181 | 0,000153 | 0,000169 | 0,000161099 | 1,32818E-05 | 8,244  |
| P70663 | SPRL1_MOUSE | SPARC-like protein 1                                                    | 4,5E-05  | 4,3E-05  | 4,04E-05 | 4,09E-05 | 4,23202E-05  | 2,0958E-06  | 4,952  | 4,22E-05 | 3,92E-05 | 4,1E-05  | 3,94E-05 | 3,61E-05 | 3,95679E-05 | 2,30433E-06 | 5,824  |
| Q91V26 | SMAP1_MOUSE | Stromal membrane-associated protein 1                                   | 0,000218 | 0,000221 | 0,000219 | 0,000218 | 0,00021906   | 1,20447E-06 | 0,550  | 0,00023  | 0,000209 | 0,000209 | 0,000205 | 0,000224 | 0,000215418 | 1,11613E-05 | 5,181  |
| Q91VR7 | MLP3A_MOUSE | Microtubule-associated proteins 1A/1B light chain 3A                    | 5,07E-05 | 6,17E-05 | 7,74E-05 | 6,51E-05 | 6,37103E-05  | 1,10148E-05 | 17,289 | 6,17E-05 | 6,37E-05 | 7,98E-05 | 8,45E-05 | 7,28E-05 | 7,25076E-05 | 9,91232E-06 | 13,671 |
| Q61696 | HS71A_MOUSE | Heat shock 70 kDa protein 1A                                            | 6,59E-05 | 9,51E-05 | 9,78E-05 | 3,55E-05 | 6,375812E-05 | 2,9231E-05  | 39,726 | 6,66E-05 | 6,35E-05 | 7,52E-05 | 7,02E-05 | 7,1E-05  | 6,92997E-05 | 4,4349E-06  | 6,400  |
| Q91L62 | GLTP_MOUSE  | Glycolipid transfer protein                                             | 0,000104 | 0,000117 | 7,49E-05 | 8,51E-05 | 9,52196E-05  | 1,87461E-05 | 19,687 | 9,41E-05 | 9,47E-05 | 9,71E-05 | 8,41E-05 | 6,26E-05 | 8,65003E-05 | 1,42745E-05 | 16,502 |
| A2A690 | TANC2_MOUSE | Protein TANC2                                                           | 0,00043  | 0,000456 | 0,000604 | 0,000558 | 0,000511961  | 8,26682E-05 | 16,149 | 0,000389 | 0,000368 | 0,000421 | 0,000385 | 0,000371 | 0,000386717 | 2,11289E-05 | 5,464  |
| Q9D3A9 | TTYH1_MOUSE | Protein tweety homolog 1                                                | 5,41E-05 | 6,17E-05 | 5,9E-05  | 5,64E-05 | 5,77964E-05  | 3,28559E-06 | 5,685  | 5,81E-05 | 4,73E-05 | 5,47E-05 | 5,23E-05 | 6,08E-05 | 5,46326E-05 | 5,24012E-06 | 9,591  |
| Q3TTY5 | K22E_MOUSE  | Keratin, type II cytoskeletal 2 epidermal                               | 3,28E-05 | 4,85E-05 | 6,05E-05 | 4,69E-05 | 4,47168E-05  | 1,13242E-05 | 24,008 | 7,42E-05 | 0,000345 | 0,000117 | 9,06E-05 | 5,36E-05 | 0,000135989 | 0,000119102 | 87,583 |
| Q922Q8 | LRC59_MOUSE | Leucine-rich repeat-containing protein 59                               | 7,86E-05 | 7,04E-05 | 6,51E-05 | 7,06E-05 | 7,11777E-05  | 5,64414E-06 | 7,817  | 7,51E-05 | 7,85E-05 | 6,27E-05 | 6,58E-05 | 6,23E-05 | 6,88787E-05 | 7,45027E-06 | 10,817 |
| Q9DA59 | GBG12_MOUSE | Guanine nucleotide-binding protein G(I)/G(S)/G(O) subunit gamma-12      | 0,000113 | 0,000124 | 0,000122 | 2,79E-05 | 9,67356E-05  | 4,61426E-05 | 47,700 | 0,000125 | 9,81E-05 | 0,000149 | 0,000165 | 0,000137 | 0,000134684 | 2,51051E-05 | 18,640 |
| Q62WV7 | RL35_MOUSE  | 60S ribosomal protein L35                                               | 2,75E-05 | 4,27E-05 | 4,49E-05 | 4,49E-05 | 4,00138E-05  | 8,39891E-06 | 20,990 | 4,22E-05 | 4,97E-05 | 5,65E-05 | 4,51E-05 | 4,8E-05  | 4,82948E-05 | 5,3974E-06  | 11,176 |
| Q8R1V4 | TMED4_MOUSE | Transmembrane emp24 domain-containing protein 4                         | 3,42E-05 | 3,44E-05 | 9,88E-06 | 2,46E-05 | 2,5759E-05   | 1,15378E-05 | 44,791 | 2,93E-05 | 4,2E-05  | 2,7E-05  | 2,55E-05 | 2,44E-05 | 2,96491E-05 | 7,14086E-06 | 24,085 |
| Q922Q4 | P5CR2_MOUSE | Pyrroline-5-carboxylate reductase 2                                     | 2,44E-05 | 2,3E-05  | 2,38E-05 | 2,54E-05 | 2,41321E-05  | 1,00967E-06 | 4,184  | 2,57E-05 | 2,37E-05 | 2,29E-05 | 2,46E-05 | 2,5E-05  | 2,44183E-05 | 1,10255E-06 | 4,515  |
| P63087 | PP1G_MOUSE  | Serine/threonine-protein phosphatase PP1-gamma catalytic subunit        | 1,67E-05 | 3,52E-05 | 3,45E-05 | 3,27E-05 | 2,9756E-05   | 8,78481E-06 | 29,233 | 3,82E-05 | 3,1E-05  | 3,3E-05  | 3,63E-05 | 2,95E-05 | 3,36093E-05 | 3,58174E-06 | 10,657 |
| P97494 | GSH1_MOUSE  | Glutamate-cysteine ligase catalytic subunit                             | 7,44E-05 | 7,7E-05  | 8,18E-05 | 7,85E-05 | 7,79093E-05  | 3,10408E-06 | 3,984  | 7,1E-05  |          |          |          |          |             |             |        |

|        |             |                                                                                |          |          |          |          |             |              |        |          |          |          |          |          |             |             |        |
|--------|-------------|--------------------------------------------------------------------------------|----------|----------|----------|----------|-------------|--------------|--------|----------|----------|----------|----------|----------|-------------|-------------|--------|
| P00158 | CYB_MOUSE   | Cytochrome b                                                                   | 7,73E-05 | 8,03E-05 | 8,86E-05 | 7,96E-05 | 8,14486E-05 | 4,93757E-06  | 6,062  | 6,02E-05 | 6,51E-05 | 6,37E-05 | 5,89E-05 | 7,14E-05 | 6,38683E-05 | 4,89454E-06 | 7,663  |
| Q99MK8 | ARBK1_MOUSE | Beta-adrenergic receptor kinase 1                                              | 6,26E-05 | 6,16E-05 | 6,63E-05 | 5,19E-05 | 6,05777E-05 | 6,12986E-06  | 10,119 | 6,56E-05 | 6,24E-05 | 5,32E-05 | 3,8E-05  | 5,32E-05 | 5,44919E-05 | 1,07314E-05 | 19,694 |
| P48453 | PP2BB_MOUSE | Serine/threonine-protein phosphatase 2B catalytic subunit beta isoform         | 9,34E-05 | 0,000113 | 0,000128 | 0,000116 | 0,00011261  | 1,44457E-05  | 12,828 | 9,95E-05 | 8,46E-05 | 9,54E-05 | 0,000108 | 8,96E-05 | 9,53391E-05 | 8,90779E-06 | 9,343  |
| Q99PV0 | PRP8_MOUSE  | Pre-mRNA-processing-splicing factor 8                                          | 2,86E-05 | 2,9E-05  | 3,13E-05 | 8,35E-06 | 2,43296E-05 | 1,07211E-05  | 44,066 | 2,86E-05 | 9,27E-06 | 2,48E-05 | 2,52E-05 | 2,69E-05 | 2,29533E-05 | 7,79884E-06 | 33,977 |
| Q9CZ78 | RAB3B_MOUSE | Ras-related protein Rab-3B                                                     | 0,000547 | 0,000398 | 0,000422 | 0,000496 | 0,000465656 | 6,84085E-05  | 15,691 | 0,000495 | 0,000502 | 0,000374 | 0,000447 | 0,000386 | 0,0004406   | 5,97009E-05 | 13,550 |
| Q9WV85 | NDK3_MOUSE  | Nucleoside diphosphate kinase 3                                                | 1,64E-05 | 2,36E-05 | 2,19E-05 | 2,26E-05 | 2,10979E-05 | 3,2301E-06   | 14,310 | 1,93E-05 | 1,78E-06 | 2,16E-05 | 1,84E-05 | 2,01E-05 | 1,62444E-05 | 8,16903E-06 | 50,288 |
| Q8C305 | SHS4_MOUSE  | Protein shisa-7                                                                | 2,99E-05 | 3,23E-05 | 3,79E-05 | 3,49E-05 | 3,37551E-05 | 4,34841E-06  | 10,186 | 3,28E-05 | 2,61E-05 | 3,21E-05 | 3,31E-05 | 3,02E-05 | 3,08404E-05 | 2,90621E-06 | 9,423  |
| Q08788 | DCTN1_MOUSE | Dynactin subunit 1                                                             | 0,000103 | 0,000139 | 0,000126 | 0,000119 | 0,000121916 | 1,5013E-05   | 12,314 | 0,000126 | 0,000133 | 9,4E-05  | 0,000123 | 0,000129 | 0,000120977 | 1,55284E-05 | 12,836 |
| P28271 | ACOC_MOUSE  | Cytoplasmic aconitate hydratase                                                | 2,44E-05 | 2,55E-05 | 2,43E-05 | 2,58E-05 | 2,49992E-05 | 7,55738E-07  | 3,023  | 2,35E-05 | 2,92E-05 | 2,5E-05  | 2,49E-05 | 2,86E-05 | 2,62363E-05 | 2,4913E-06  | 9,496  |
| Q9D358 | PPAC_MOUSE  | Low molecular weight phosphotyrosine protein phosphatase                       | 6,93E-05 | 8,59E-05 | 9,13E-05 | 7,55E-05 | 8,05105E-05 | 9,96278E-06  | 12,375 | 2,67E-06 | 6,16E-05 | 7,55E-05 | 6,79E-05 | 6,28E-05 | 5,40859E-05 | 2,92538E-05 | 54,088 |
| A2AGT5 | CKAP5_MOUSE | Cytoskeleton-associated protein 5                                              | 3,4E-05  | 4,47E-05 | 3,88E-05 | 4,72E-05 | 4,11834E-05 | 5,93494E-06  | 14,411 | 4,83E-05 | 3,3E-05  | 4,44E-05 | 4,67E-05 | 4,33E-05 | 4,31426E-05 | 6,00434E-06 | 13,917 |
| P23116 | EIF3A_MOUSE | Eukaryotic translation initiation factor 3 subunit A                           | 3,39E-05 | 4,55E-05 | 3,56E-05 | 3,55E-05 | 3,76412E-05 | 5,29754E-06  | 14,074 | 5,06E-05 | 4,81E-05 | 4,12E-05 | 3,96E-05 | 4,22E-05 | 4,4344E-05  | 4,75483E-06 | 10,723 |
| Q9QUR6 | PPCE_MOUSE  | Prolyl endopeptidase                                                           | 4,93E-05 | 4,68E-05 | 3,21E-06 | 5,01E-05 | 3,73638E-05 | 2,28104E-05  | 61,049 | 4,93E-05 | 4,03E-05 | 3,4E-05  | 3,78E-05 | 4,02E-05 | 4,03244E-05 | 5,60795E-06 | 13,907 |
| P61294 | RAB6B_MOUSE | Ras-related protein Rab-6B                                                     | 1,92E-05 | 1,88E-05 | 2,21E-05 | 1,93E-05 | 1,98546E-05 | 1,4899E-06   | 7,504  | 1,95E-05 | 2,58E-05 | 2,54E-05 | 2,05E-05 | 1,65E-05 | 2,15535E-05 | 3,96482E-06 | 18,395 |
| P34022 | RANG_MOUSE  | Specific GTPase-activating protein                                             | 0,000123 | 0,000116 | 0,00013  | 0,00013  | 0,000124729 | 6,44134E-06  | 5,164  | 0,000115 | 0,000108 | 0,000129 | 0,00012  | 0,000122 | 0,00018663  | 7,60697E-06 | 6,411  |
| Q88FP9 | PDK1_MOUSE  | [Pyruvate dehydrogenase (acetyl-transferring)] kinase isozyme 1, mitochondrial | 4,95E-05 | 4,78E-05 | 4,76E-05 | 5,1E-05  | 4,8965E-05  | 1,61063E-06  | 3,289  | 4,37E-05 | 4,01E-05 | 4E-05    | 4,31E-05 | 3,94E-05 | 4,12642E-05 | 1,97898E-06 | 4,796  |
| Q61595 | KTN1_MOUSE  | Kinectin                                                                       | 0,000503 | 0,000174 | 0,000148 | 0,0002   | 0,000256344 | 0,000165562  | 64,586 | 0,000196 | 0,000274 | 0,000176 | 0,000222 | 0,000205 | 0,000214627 | 3,71117E-05 | 17,291 |
| Q9JIG7 | CDD22_MOUSE | Coiled-coil domain-containing protein 22                                       | 2,47E-05 | 3,55E-05 | 3,89E-05 | 2,81E-05 | 3,17987E-05 | 6,50468E-06  | 20,456 | 1,38E-06 | 1,43E-05 | 2,64E-05 | 2,26E-05 | 2,94E-05 | 1,88257E-05 | 1,12655E-05 | 59,841 |
| Q9EPR4 | S23A2_MOUSE | Solute carrier family 23 member 2                                              | 2,08E-05 | 2,41E-05 | 2,03E-05 | 2,67E-05 | 2,29569E-05 | 3,30668E-06  | 13,202 | 2,03E-05 | 1,92E-05 | 1,85E-05 | 1,52E-05 | 2,22E-05 | 1,90764E-05 | 2,5993E-06  | 13,626 |
| O88737 | BSN_MOUSE   | Protein bassoon                                                                | 1,87E-05 | 2,2E-05  | 2,77E-05 | 1,72E-05 | 2,139E-05   | 4,67727E-06  | 21,867 | 2,44E-05 | 2,29E-05 | 1,59E-05 | 1,69E-05 | 2,34E-05 | 2,07079E-05 | 3,9579E-06  | 19,113 |
| Q8BU30 | SYIC_MOUSE  | Isoleucine--tRNA ligase, cytoplasmic                                           | 3,83E-05 | 4,66E-05 | 4,47E-05 | 3,82E-05 | 4,19563E-05 | 4,31637E-06  | 10,288 | 4,5E-05  | 4,23E-05 | 5,95E-06 | 3,68E-05 | 3,62E-05 | 3,32438E-05 | 1,57008E-05 | 47,229 |
| Q8CCK0 | H2AW_MOUSE  | Core histone macro-H2A.2                                                       | 5,71E-05 | 6,07E-05 | 5,14E-05 | 5,96E-05 | 5,72062E-05 | 4,16633E-06  | 7,283  | 5,92E-05 | 5,26E-05 | 5,33E-05 | 5,55E-05 | 5,49E-05 | 5,4962E-05  | 2,59774E-06 | 4,726  |
| Q61543 | GSLG1_MOUSE | Golgi apparatus protein 1                                                      | 6,97E-05 | 5,35E-05 | 8,07E-05 | 6,61E-05 | 6,75129E-05 | 1,12067E-05  | 16,599 | 5,61E-05 | 3,91E-05 | 5,21E-05 | 5,13E-05 | 6,95E-05 | 5,3606E-05  | 1,09094E-05 | 20,351 |
| P12815 | PDCD6_MOUSE | Programmed cell death protein 6                                                | 2,48E-05 | 2,69E-05 | 3,52E-05 | 2,94E-06 | 2,24571E-05 | 1,37583E-05  | 61,265 | 2,27E-05 | 2,8E-05  | 2,86E-05 | 2,88E-05 | 3,06E-05 | 2,7748E-05  | 2,99864E-06 | 10,807 |
| Q99M87 | DNJA3_MOUSE | DnaJ homolog subfamily A member 3, mitochondrial                               | 2,68E-05 | 2,84E-05 | 2,81E-05 | 2,91E-05 | 2,81145E-05 | 9,53638E-07  | 3,392  | 2,77E-05 | 2,37E-05 | 2,45E-05 | 2,54E-05 | 2,82E-05 | 2,59069E-05 | 1,95617E-06 | 7,551  |
| Q921H8 | THIKA_MOUSE | 3-ketoacyl-CoA thiolase A, peroxisomal                                         | 2,64E-05 | 3,23E-05 | 2,86E-05 | 2,79E-05 | 2,87843E-05 | 2,51827E-06  | 8,749  | 2,41E-05 | 2,57E-05 | 2,53E-05 | 2,38E-05 | 3,94E-05 | 2,7651E-05  | 6,59597E-06 | 23,854 |
| Q0GNC1 | INF2_MOUSE  | Inverted formin-2                                                              | 9,14E-06 | 1,33E-05 | 1,01E-05 | 1,12E-05 | 1,09455E-05 | 1,7958E-06   | 16,407 | 1,52E-05 | 1,24E-05 | 1,21E-05 | 1,43E-05 | 1,63E-05 | 1,40323E-05 | 1,80337E-06 | 12,852 |
| Q9CY27 | TECR_MOUSE  | Very-long-chain enoyl-CoA reductase                                            | 7,51E-05 | 7,12E-05 | 5,94E-05 | 6,87E-05 | 6,85985E-05 | 6,66794E-06  | 9,720  | 6,38E-05 | 5,86E-05 | 5,94E-05 | 5,27E-05 | 6,1E-05  | 5,91027E-05 | 4,09734E-06 | 6,933  |
| Q9IKD3 | SCAM5_MOUSE | Secretory carrier-associated membrane protein 5                                | 0,000285 | 0,000192 | 0,000233 | 0,000236 | 0,000236521 | 3,80377E-05  | 16,802 | 0,000167 | 0,000284 | 0,000177 | 0,000153 | 0,00027  | 0,000210352 | 6,17845E-05 | 29,372 |
| Q07076 | ANXA7_MOUSE | Annexin A7                                                                     | 8,22E-05 | 6,36E-05 | 7,57E-05 | 6,66E-05 | 7,20104E-05 | 8,52069E-06  | 11,833 | 7,17E-05 | 6,87E-05 | 7,07E-05 | 7,6E-05  | 6,79E-05 | 7,09899E-05 | 3,17541E-06 | 4,473  |
| Q921R2 | BAG6_MOUSE  | Large proline-rich protein BAG6                                                | 4,15E-05 | 4,75E-05 | 5E-05    | 4,72E-05 | 4,65449E-05 | 5,38069E-06  | 7,693  | 4,59E-05 | 4,24E-05 | 4,28E-05 | 3,85E-05 | 4,76E-05 | 4,34507E-05 | 3,48362E-06 | 8,017  |
| Q9D880 | TIM50_MOUSE | Mitochondrial import inner membrane translocase subunit TIM50                  | 2,78E-05 | 3,75E-05 | 2,92E-05 | 2,34E-05 | 2,94937E-05 | 5,89829E-06  | 19,998 | 3,15E-05 | 4,09E-05 | 2,91E-05 | 2,06E-05 | 2,93E-05 | 3,03026E-05 | 7,26018E-06 | 23,959 |
| P51855 | GSHB_MOUSE  | Glutathione synthetase                                                         | 8,72E-05 | 7,14E-05 | 7,59E-05 | 8,58E-05 | 8,0091E-05  | 7,65586E-06  | 9,559  | 6,29E-05 | 7,93E-05 | 8,38E-05 | 8,49E-05 | 7,01E-05 | 7,62176E-05 | 9,43896E-06 | 12,384 |
| Q80U17 | RB3GP_MOUSE | Rab3 GTPase-activating protein catalytic subunit                               | 5,11E-05 | 4,59E-05 | 4,82E-05 | 4,56E-05 | 4,77196E-05 | 5,25589E-06  | 5,362  | 4,48E-05 | 4,41E-05 | 3,61E-05 | 3,92E-05 | 4,48E-05 | 4,17915E-05 | 3,94131E-06 | 9,431  |
| O08583 | THOC4_MOUSE | THO complex subunit 4                                                          | 1,88E-05 | 2,12E-05 | 2,35E-05 | 2,17E-05 | 2,1299E-05  | 1,90767E-06  | 8,957  | 2,57E-05 | 2,75E-05 | 2,46E-05 | 1,77E-05 | 2,46E-05 | 2,40016E-05 | 3,73916E-06 | 15,579 |
| P56376 | ACYP1_MOUSE | Acylphosphatase-1                                                              | 5,72E-06 | 7,99E-06 | 8,95E-06 | 9,47E-06 | 8,02951E-06 | 1,65923E-06  | 20,664 | 7,39E-06 | 7,84E-06 | 9,61E-06 | 8,21E-06 | 8,22E-06 | 8,25302E-06 | 8,29583E-07 | 10,052 |
| P52503 | NDU56_MOUSE | NADH dehydrogenase [ubiquinone] iron-sulfur protein 6, mitochondrial           | 2,53E-05 | 2,84E-05 | 2,18E-05 | 2,4E-05  | 2,48602E-05 | 2,74627E-06  | 11,047 | 5,89E-06 | 3,39E-05 | 3,19E-05 | 2,46E-05 | 1,99E-05 | 2,32472E-05 | 1,12146E-05 | 48,241 |
| P46061 | RAGP1_MOUSE | Ran GTPase-activating protein 1                                                | 7,31E-05 | 6,78E-05 | 6,54E-05 | 6,59E-05 | 6,8061E-05  | 3,349356E-06 | 5,133  | 7,08E-05 | 8,85E-05 | 5,83E-05 | 7,27E-05 | 7,41E-05 | 7,28798E-05 | 1,07816E-05 | 14,794 |
| Q60829 | PPR1B_MOUSE | Protein phosphatase 1 regulatory subunit 1B                                    | 6,92E-05 | 4,92E-05 | 6,56E-05 | 4,08E-05 | 5,62247E-05 | 1,34598E-05  | 23,939 | 5,59E-05 | 4,65E-05 | 4,86E-05 | 7,14E-06 | 9,92E-05 | 5,14829E-05 | 3,27728E-05 | 63,658 |
| Q88H20 | FA49A_MOUSE | Protein FAM49A                                                                 | 2,47E-05 | 2,48E-05 | 3,41E-05 | 2,82E-05 | 2,7948E-05  | 4,37966E-06  | 16,671 | 2,9E-05  | 2,47E-05 | 2,16E-05 | 2,73E-05 | 2,84E-05 | 2,62099E-05 | 3,06302E-06 | 11,687 |
| O54916 | REPS1_MOUSE | RalBP1-associated Eps domain-containing protein 1                              | 1,1E-05  | 1,14E-05 | 1,36E-05 | 1,34E-05 | 1,23609E-05 | 1,35662E-06  | 10,975 | 1,26E-05 | 1,38E-05 | 1,28E-05 | 1,17E-05 | 1,57E-05 | 1,3318E-05  | 1,52407E-06 | 11,444 |
| Q9D7H3 | RTCA_MOUSE  | RNA 3'-terminal phosphate cyclase                                              | 2,45E-05 | 3,1E-05  | 2,61E-05 | 2,33E-05 | 2,62304E-05 | 3,37707E-06  | 12,875 | 2,22E-05 | 1,7E-06  | 2,53E-05 | 2,42E-05 | 2,28E-05 | 1,92353E-05 | 9,88164E-06 | 51,372 |
| P58771 | TPM1_MOUSE  | Tropomyosin alpha-1 chain                                                      | 9,34E-05 | 8,94E-05 | 9,29E-05 | 8,23E-05 | 8,95188E-05 | 5,09187E-06  | 5,688  | 9,35E-05 | 7,81E-05 | 9,25E-05 | 8,34E-05 | 8,9E-05  | 8,73261E-05 | 6,47757E-06 | 7,418  |
| Q9ERK4 | XPO2_MOUSE  | Exportin-2                                                                     | 4,44E-05 | 4,78E-05 | 4,48E-05 | 4,81E-05 | 4,62583E-05 | 1,95387E-06  | 4,224  | 4,85E-05 | 4,95E-05 | 4,56E-05 | 4,59E-05 | 4,5E-05  | 4,68913E-05 | 1,98508E-06 | 4,233  |
| P21619 | LMNB2_MOUSE | Lamin-B2                                                                       | 2,06E-05 | 2,16E-05 | 2,37E-05 | 2,17E-05 | 2,19154E-05 | 1,27784E-06  | 5,831  | 1,93E-05 | 1,74E-05 | 2,06E-05 | 1,73E-05 | 2,14E-05 | 1,91752E-05 | 1,86255E-06 | 9,713  |
| P32020 | NLTP_MOUSE  | Non-specific lipid-transfer protein                                            | 2,14E-05 | 2,47E-05 | 2,77E-05 | 2,58E-05 | 2,48987E-05 | 2,65497E-06  | 10,663 | 2,1E-05  | 2,4E-05  | 2,38E-05 | 2,4E-05  | 2,15E-05 | 2,28629E-05 | 1,50361E-06 | 6,577  |
| Q9CQ62 | DECR_MOUSE  | 2,4-dienyl-CoA reductase, mitochondrial                                        | 2,99E-05 | 2,76E-05 | 2,88E-05 | 2,71E-05 | 2,8368E-05  | 1,25935E-06  | 4,439  | 2,63E-05 | 2,91E-05 | 3,2E-05  | 3,12E-05 | 2,24E-05 | 2,81939E-05 | 3,93354E-06 | 13,952 |
| P35278 | RAB5C_MOUSE | Ras-related protein Rab-5C                                                     | 5,91E-06 | 7,36E-06 | 5,44E-06 | 6,53E-06 | 6,31256E-06 | 8,309E-07    | 13,163 | 6,71E-06 | 6,69E-06 | 6,96E-06 | 5,62E-06 | 1,1E-06  | 5,81685E-06 | 2,85609E-06 | 49,100 |
| Q92511 | ATAD3_MOUSE | ATPase family AAA domain-containing protein 3                                  | 5,72E-05 | 6,21E-05 | 5,34E-05 | 2,82E-06 | 4,3899E-05  | 2,76179E-05  | 62,912 | 5,14E-05 | 5,51E-05 | 5,58E-05 | 4,87E-05 | 5,58E-05 | 5,33551E-05 | 3,18716E-06 | 5,973  |
| P45878 | FKBP2_MOUSE | Peptidyl-prolyl cis-trans isomerase FKBP2                                      | 5,01E-05 | 5,38E-05 | 5,82E-05 | 5,15E-05 | 5,34131E-05 | 3,5142E-06   | 6,579  | 5,68E-05 | 6,03E-05 | 5,96E-05 | 5,76E-05 | 6,51E-05 | 5,98693E-05 | 3,23479E-06 | 5,403  |
| Q9EPN1 | NBEA_MOUSE  | Neurobeachin                                                                   | 8,85E-06 | 1,43E-05 | 1,29E-05 | 4,88E-07 | 9,13762E-06 | 6,21188E-06  | 67,981 | 1,41E-05 | 4,17E-06 | 1,27E-05 | 1,23E-05 | 1,72E-05 | 1,21115E-05 | 4,84296E-06 | 39,986 |
| Q9WVK4 | EHD1_MOUSE  | EH domain-containing protein 1                                                 | 2,11E-05 | 4,35E-05 | 4,66E-05 | 4,48E-05 | 3,90058E-05 | 1,20169E-05  | 30,808 | 3,53E-05 | 4,42E-05 |          |          |          |             |             |        |
