# Supplementary material for: Chronic treatment with D2-antagonist haloperidol leads to inhibitory/excitatory imbalance in striatal D1-neurons
Source: PubMed Central journal article supplement (PMC10558446; doi:10.1038/s41398-023-02609-w), 2023-10-06
Supplement: 41398_2023_2609_MOESM4_ESM.pdf [file 41398_2023_2609_MOESM4_ESM.pdf]

Sup.Table S3 – List of all proteins ordered by p value. All individual values are normalized to the control average.

| Accession Name | Protein Name | Norm WT1    | Norm WT2    | Norm WT3    | Norm WT4    | Norm Halop1 | Norm Halop2 | Norm Halop3 | Norm Halop4 | Norm Halop5 | AVG KO/WT   | TTEST    |
|----------------|--------------|-------------|-------------|-------------|-------------|-------------|-------------|-------------|-------------|-------------|-------------|----------|
| P50518         | VATE1        | 0,96300661  | 0,987426103 | 1,00705504  | 1,042512247 | 1,201769441 | 1,165018934 | 1,24215071  | 1,265320483 | 1,213212888 | 1,217494491 | 4,6E-05  |
| O08585         | CLCA         | 0,951474781 | 0,996663232 | 1,012556915 | 1,039305072 | 0,842344273 | 0,754415175 | 0,797747691 | 0,752325346 | 0,761471822 | 0,781660861 | 5,72E-05 |
| O09167         | RL21         | 0,971338625 | 1,05135608  | 0,970066406 | 1,007238889 | 0,833829703 | 0,804865003 | 0,795768854 | 0,840030656 | 0,765053465 | 0,807909536 | 6,59E-05 |
| O08599         | STXB1        | 0,999355262 | 1,006092662 | 1,016318909 | 0,978233167 | 0,93004267  | 0,939735231 | 0,902885252 | 0,929473578 | 0,91471422  | 0,92337019  | 0,000137 |
| Q9WUA3         | PFKAP        | 1,009451317 | 0,993902121 | 0,975692335 | 1,020954228 | 1,21440984  | 1,120737179 | 1,16342132  | 1,195810202 | 1,243529326 | 1,187581573 | 0,000156 |
| Q9D8B4         | NDUAB        | 1,047381912 | 1,047683713 | 1,025104286 | 0,879830089 | 0,762187875 | 0,696124751 | 0,697160484 | 0,756899535 | 0,710935287 | 0,724661586 | 0,000204 |
| Q8BZ98         | DYN3         | 0,979493708 | 0,999855805 | 0,985070402 | 1,035580085 | 1,139406633 | 1,199648892 | 1,240342277 | 1,187439018 | 1,295046474 | 1,212376659 | 0,000278 |
| Q62283         | TSN7         | 1,031346753 | 0,985365844 | 1,027622291 | 0,955665112 | 1,422611345 | 1,178700523 | 1,388878284 | 1,366344529 | 1,41146097  | 1,35359913  | 0,000292 |
| Q8C7X2         | EMC1         | 0,978345776 | 1,023999746 | 0,972096705 | 1,025557773 | 0,796799514 | 0,844686025 | 0,795628404 | 0,883480993 | 0,871774986 | 0,838473985 | 0,000295 |
| Q63810         | CANB1        | 0,955432392 | 0,989975114 | 1,129123256 | 0,925469238 | 0,760398593 | 0,685045694 | 0,746854887 | 0,68372054  | 0,654360087 | 0,70607596  | 0,000358 |
| P14733         | LMNB1        | 0,993529965 | 0,994343696 | 0,961595888 | 1,05053045  | 1,203308923 | 1,153569854 | 1,148416638 | 1,252370082 | 1,267610065 | 1,205055112 | 0,000378 |
| Q8BFP9         | PDK1         | 1,011240784 | 0,976154247 | 0,971148953 | 1,041456016 | 0,892475102 | 0,818398111 | 0,816881193 | 0,88035696  | 0,805537019 | 0,842729677 | 0,000415 |
| Q791T5         | MTCH1        | 1,040925767 | 1,002963545 | 1,044382906 | 0,911727782 | 0,709632164 | 0,722375239 | 0,84814858  | 0,724445764 | 0,760463805 | 0,75301311  | 0,000419 |
| Q8R010         | AIMP2        | 0,964717862 | 0,986345181 | 1,001535387 | 1,047401571 | 0,897683402 | 0,766362946 | 0,768476086 | 0,797965771 | 0,799837693 | 0,806065179 | 0,000441 |
| Q8BKZ9         | ODPX         | 1,061994625 | 0,983724167 | 0,996280811 | 0,958000398 | 0,877028142 | 0,789487074 | 0,830675536 | 0,865752168 | 0,815733439 | 0,835735272 | 0,000462 |
| Q5DTY9         | KCD16        | 0,902548655 | 0,994387023 | 1,100967497 | 1,002096825 | 0,771649173 | 0,692812151 | 0,786632215 | 0,773027043 | 0,706812951 | 0,746186707 | 0,000502 |
| P05132         | KAPCA        | 1,023517503 | 1,031117468 | 0,93300329  | 1,012361739 | 0,892062597 | 0,802875508 | 0,821325762 | 0,796580162 | 0,771904005 | 0,816949607 | 0,000541 |
| Q9D0M5         | DYL2         | 0,969148596 | 0,924765597 | 1,116205131 | 0,989880676 | 0,665392729 | 0,748448787 | 0,736513224 | 0,806843938 | 0,685963378 | 0,728632411 | 0,000583 |
| Q9DBS2         | TPRGL        | 0,939034516 | 0,964958619 | 0,9805371   | 1,115469766 | 0,800376962 | 0,79888284  | 0,771084975 | 0,793446385 | 0,799240675 | 0,792606367 | 0,000604 |
| P0DN34         | NDUB1        | 0,981306132 | 0,928181573 | 1,072172986 | 1,018339308 | 0,780280744 | 0,821034441 | 0,842814414 | 0,741922974 | 0,717603827 | 0,78073128  | 0,000645 |
| Q8R366         | IGSF8        | 0,956297907 | 1,05121164  | 0,978133093 | 1,014357361 | 1,105420158 | 1,176551211 | 1,179232451 | 1,136658352 | 1,110978872 | 1,141768209 | 0,000854 |
| Q9CR62         | M2OM         | 1,050235616 | 0,990164702 | 0,963218785 | 0,996380898 | 0,788487212 | 0,751863091 | 0,872156732 | 0,805148131 | 0,67555687  | 0,778642407 | 0,000873 |
| P63017         | HSP7C        | 0,97115708  | 1,071886181 | 0,961460445 | 0,995496294 | 1,139839595 | 1,131965423 | 1,138275259 | 1,170697311 | 1,223077854 | 1,160771088 | 0,0009   |
| Q60676         | PPP5         | 1,014578614 | 0,91824966  | 1,107917433 | 0,959254294 | 0,808604891 | 0,756372369 | 0,790920788 | 0,795695589 | 0,702562127 | 0,770831153 | 0,000958 |
| P00158         | CYB          | 0,94943081  | 0,985736904 | 1,087926312 | 0,976905975 | 0,738727883 | 0,799610725 | 0,782466754 | 0,72370105  | 0,876268651 | 0,784155013 | 0,001083 |
| Q8R2V5         | ADAP2        | 1,044894965 | 1,001507317 | 1,052126538 | 0,90147118  | 0,797955404 | 0,505934024 | 0,708426379 | 0,55985414  | 0,522792736 | 0,618992537 | 0,001108 |
| Q61990         | PCBP2        | 0,956958987 | 1,007542834 | 1,015884241 | 1,019613938 | 0,876303615 | 0,872168645 | 0,917739512 | 0,813960275 | 0,794884978 | 0,855011405 | 0,001386 |
| Q61171         | PRDX2        | 0,936296808 | 0,968383394 | 1,121196052 | 0,974123746 | 0,82945376  | 0,807780064 | 0,822026006 | 0,800967557 | 0,802135094 | 0,812472496 | 0,001404 |
| Q8BH59         | CMC1         | 1,025319284 | 1,031257326 | 0,987297277 | 0,956126113 | 0,906671315 | 0,860988094 | 0,899485552 | 0,904821676 | 0,927483614 | 0,89989005  | 0,001437 |
| P26369         | U2AF2        | 0,914400657 | 0,963115117 | 1,131554477 | 0,990929749 | 0,607483214 | 0,598645594 | 0,758644785 | 0,805274436 | 0,72554832  | 0,69911927  | 0,001875 |
| Q9JIS5         | SV2A         | 0,984423602 | 1,044534551 | 0,950317376 | 1,020724471 | 1,242309781 | 1,161527178 | 1,11733716  | 1,120005594 | 1,247212587 | 1,17767846  | 0,001979 |
| P99028         | QCR6         | 1,008211568 | 0,891709357 | 1,11227272  | 0,987806355 | 0,453688933 | 0,663468003 | 0,561954607 | 0,641688765 | 0,811685712 | 0,626497204 | 0,001983 |
| Q9CQJ8         | NDUB9        | 1,07924261  | 0,932259604 | 1,006107802 | 0,982389985 | 0,845064187 | 0,710070828 | 0,835349846 | 0,656547778 | 0,653506113 | 0,740107751 | 0,002098 |
| Q99LC3         | NDUAA        | 1,039100108 | 0,995413497 | 0,996537738 | 0,968948657 | 0,879051798 | 0,778643569 | 0,857208898 | 0,827396616 | 0,685494576 | 0,805559091 | 0,002116 |
| Q9JIG8         | PRAF2        | 0,97223514  | 1,051080213 | 1,013492699 | 0,963191948 | 0,915209142 | 0,921309656 | 0,919068281 | 0,88891429  | 0,907759771 | 0,910452228 | 0,002162 |
| P14824         | ANXA6        | 0,953978246 | 1,034656997 | 0,998897825 | 1,012466931 | 1,104087853 | 1,066845993 | 1,07066019  | 1,069686719 | 1,087368042 | 1,079729759 | 0,002209 |
| Q7TMM9         | TBB2A        | 0,564898587 | 1,536250097 | 0,719275434 | 1,179575882 | 2,846056875 | 2,329444864 | 1,727809217 | 2,320054148 | 2,316632254 | 2,307999472 | 0,002259 |

|        |       |             |             |             |             |             |             |             |             |             |             |          |
|--------|-------|-------------|-------------|-------------|-------------|-------------|-------------|-------------|-------------|-------------|-------------|----------|
| Q9CQH3 | NDUB5 | 0,978769323 | 1,084081548 | 0,934528521 | 1,002620608 | 0,814662021 | 0,846012865 | 0,898187902 | 0,774373503 | 0,770552879 | 0,820757834 | 0,002354 |
| Q9R0Q6 | ARC1A | 0,998742797 | 0,953463181 | 1,006078228 | 1,041715794 | 0,935017574 | 0,773220906 | 0,812115513 | 0,821633658 | 0,754500991 | 0,819297728 | 0,002403 |
| Q9DB77 | QCR2  | 1,084497403 | 0,964943596 | 0,998345838 | 0,952213163 | 0,833764841 | 0,897140665 | 0,884235986 | 0,848805503 | 0,864884907 | 0,86576638  | 0,002508 |
| Q9D4H1 | EXOC2 | 0,99228065  | 0,983602455 | 1,052523433 | 0,971593461 | 0,859163647 | 0,734008121 | 0,746440168 | 0,836776534 | 0,906933673 | 0,816664429 | 0,002856 |
| Q9DCZ4 | MIC26 | 0,9532767   | 0,963932384 | 1,062243891 | 1,020547026 | 0,80005657  | 0,742984457 | 0,915662978 | 0,853275999 | 0,756351677 | 0,813666336 | 0,003255 |
| O70252 | HMOX2 | 1,018753582 | 0,989470724 | 0,951286359 | 1,040489335 | 1,155518671 | 1,104035515 | 1,282625089 | 1,329049473 | 1,328960561 | 1,240037862 | 0,003429 |
| Q56A07 | SCN2B | 1,044631285 | 0,936026328 | 1,051422981 | 0,967919406 | 0,896365717 | 0,823209949 | 0,878791224 | 0,746130767 | 0,780470934 | 0,824993718 | 0,003634 |
| Q8CA71 | SHSA4 | 1,002125219 | 0,897945921 | 1,056188322 | 1,043740538 | 0,803165124 | 0,866165755 | 0,807631838 | 0,759404589 | 0,643806281 | 0,776034718 | 0,003772 |
| Q62083 | PICK1 | 0,997312986 | 1,031242135 | 0,991522328 | 0,979922551 | 0,828674593 | 0,728238746 | 0,795127036 | 0,945470276 | 0,835209905 | 0,826544111 | 0,003957 |
| Q9CQZ6 | NDUB3 | 0,962483301 | 0,996393229 | 1,017494468 | 1,023629002 | 0,757905184 | 0,856272771 | 0,938020143 | 0,803774449 | 0,733749363 | 0,817944382 | 0,003978 |
| Q9D855 | QCR7  | 0,913070799 | 1,057155453 | 0,950331582 | 1,079442165 | 0,681815436 | 0,820890815 | 0,859393836 | 0,787376943 | 0,655421105 | 0,760979627 | 0,004163 |
| Q9Z2W0 | DNPEP | 1,0619552   | 0,95079104  | 1,011751705 | 0,975502055 | 0,858486305 | 0,778161599 | 0,798873981 | 0,913510662 | 0,891886452 | 0,8481838   | 0,004188 |
| P07724 | ALBU  | 1,250755298 | 0,714581354 | 0,991152422 | 1,043510926 | 0,622690075 | 0,518622354 | 0,577560566 | 0,457979655 | 0,65140571  | 0,565651672 | 0,004326 |
| Q922Q1 | MARC2 | 0,958996298 | 0,997809141 | 1,068405182 | 0,974789379 | 0,76395923  | 0,923843512 | 0,881850265 | 0,785658127 | 0,786795446 | 0,828421316 | 0,004332 |
| P32037 | GTR3  | 1,052545423 | 1,068037503 | 0,931841837 | 0,947575236 | 1,21926401  | 1,112889031 | 1,142682922 | 1,12892357  | 1,16880461  | 1,154512829 | 0,00437  |
| P43006 | EAA2  | 1,067323387 | 0,96828761  | 0,969613481 | 0,994775522 | 1,092552185 | 1,115404886 | 1,06016233  | 1,101688893 | 1,109837504 | 1,09592916  | 0,004394 |
| P10126 | EF1A1 | 0,947031708 | 1,094901186 | 0,970439966 | 0,987627141 | 1,087493762 | 1,180104537 | 1,171440084 | 1,270823017 | 1,194852907 | 1,180942861 | 0,004433 |
| Q62188 | DPYL3 | 0,900496323 | 1,06551307  | 0,942081283 | 1,091909323 | 1,202865314 | 1,147894173 | 1,232506102 | 1,299168172 | 1,166422778 | 1,209771308 | 0,004441 |
| Q64516 | GLPK  | 1,080605503 | 0,965060703 | 1,024161182 | 0,930172611 | 0,8731924   | 0,78341786  | 0,842375391 | 0,898656838 | 0,773448076 | 0,834218113 | 0,004461 |
| P63082 | VATL  | 0,817944451 | 0,746873505 | 1,476506766 | 0,958675278 | 1,383070281 | 1,734127929 | 1,978950079 | 2,017669718 | 2,096905115 | 1,842144624 | 0,004691 |
| Q91YT0 | NDUV1 | 1,065082166 | 0,995023373 | 0,960258795 | 0,979635666 | 0,868462206 | 0,886241117 | 0,949115489 | 0,888405468 | 0,855293401 | 0,889503536 | 0,004715 |
| Q9CQX2 | CYB5B | 0,971259862 | 1,069966775 | 1,024844029 | 0,933929335 | 0,824716468 | 0,890161159 | 0,915865274 | 0,818280616 | 0,864822086 | 0,862769121 | 0,004763 |
| O55029 | COPB2 | 1,070278041 | 1,082012782 | 0,96036205  | 0,887347128 | 0,812816206 | 0,85671611  | 0,848584205 | 0,811624987 | 0,807814038 | 0,827511109 | 0,004811 |
| Q9QXB9 | DRG2  | 0,9534395   | 1,04554315  | 1,014417992 | 0,986599358 | 0,944265185 | 0,805573692 | 0,865936895 | 0,789833703 | 0,756472969 | 0,832416489 | 0,004838 |
| Q8BGH2 | SAM50 | 1,053081672 | 0,935852082 | 1,015421504 | 0,995644742 | 0,851573187 | 0,860021294 | 0,942058538 | 0,873008351 | 0,899053977 | 0,885143069 | 0,004887 |
| Q80UW2 | FBX2  | 1,034556386 | 1,019075892 | 0,982810852 | 0,963556871 | 0,880309815 | 0,834698624 | 0,883540752 | 0,827344191 | 0,680438494 | 0,821266375 | 0,004995 |
| P55088 | AQP4  | 1,023302396 | 1,156571571 | 0,841927437 | 0,978198596 | 1,387266555 | 1,399528346 | 1,538236738 | 1,291080813 | 1,176002872 | 1,358423065 | 0,00501  |
| Q6PIE5 | AT1A2 | 1,064829953 | 1,083437752 | 0,848808271 | 1,002924023 | 1,293358731 | 1,413300379 | 1,251011123 | 1,191287175 | 1,187109297 | 1,267213341 | 0,005017 |
| P62141 | PP1B  | 0,974732939 | 0,997952771 | 1,015668774 | 1,011645516 | 1,066666162 | 1,115767996 | 1,170969321 | 1,049052154 | 1,106704482 | 1,101832023 | 0,005141 |
| O35857 | TIM44 | 1,041125328 | 0,89512984  | 1,127189007 | 0,936555825 | 0,804344315 | 0,804874011 | 0,796997745 | 0,744199945 | 0,608383523 | 0,751759908 | 0,005464 |
| Q8R1N4 | NUDC3 | 1,058874398 | 0,756181271 | 1,126909516 | 1,058034815 | 0,689744109 | 0,522812857 | 0,777665334 | 0,678929419 | 0,573265167 | 0,648483377 | 0,005528 |
| Q61206 | PA1B2 | 0,937924907 | 0,946331841 | 1,084680691 | 1,031062562 | 0,850590722 | 0,823830842 | 0,899934802 | 0,887980523 | 0,795435945 | 0,851554567 | 0,005846 |
| P61922 | GABT  | 1,013333436 | 1,047175354 | 0,964642167 | 0,974849043 | 1,084578718 | 1,154582039 | 1,093165261 | 1,221364526 | 1,097317473 | 1,130201603 | 0,006235 |
| Q8BH95 | ECHM  | 0,981444905 | 0,992524021 | 0,91622357  | 1,109807505 | 1,104552581 | 1,179407641 | 1,288231219 | 1,366596425 | 1,245840209 | 1,236925615 | 0,006541 |
| Q60930 | VDAC2 | 1,033982981 | 1,006661979 | 0,947955049 | 1,011399991 | 0,867034342 | 0,896665943 | 0,914740745 | 0,798485563 | 0,731348513 | 0,841655021 | 0,006758 |
| Q9D0K2 | SCOT1 | 0,948716245 | 0,973738333 | 1,030881371 | 1,046664051 | 1,076802998 | 1,091380291 | 1,154853904 | 1,233735428 | 1,147356489 | 1,140825822 | 0,007111 |
| Q02053 | UBA1  | 0,939358351 | 1,058047324 | 0,999020587 | 1,003573738 | 1,150211679 | 1,109330059 | 1,075648541 | 1,076430665 | 1,181071039 | 1,118538397 | 0,007314 |
| P62631 | EF1A2 | 0,918845039 | 1,104691426 | 0,925905422 | 1,050558113 | 1,162886373 | 1,171510238 | 1,155108538 | 1,154810217 | 1,125740518 | 1,154011177 | 0,007536 |
| Q9DC69 | NDUA9 | 1,033225815 | 0,949074774 | 0,947960752 | 1,069738658 | 0,825698426 | 0,863914909 | 0,845121408 | 0,729956846 | 0,604074759 | 0,77375327  | 0,00757  |
| P48962 | ADT1  | 1,133593882 | 0,957066755 | 0,946928858 | 0,962410505 | 0,817618725 | 0,850989086 | 0,883764804 | 0,829634244 | 0,744271065 | 0,825255585 | 0,007625 |

|        |       |             |             |             |             |             |             |             |             |             |             |          |
|--------|-------|-------------|-------------|-------------|-------------|-------------|-------------|-------------|-------------|-------------|-------------|----------|
| P46664 | PURA2 | 0,94514762  | 1,024574963 | 1,056081283 | 0,974196134 | 0,868658407 | 0,838548555 | 0,89959746  | 0,925794186 | 0,927171882 | 0,891954098 | 0,007652 |
| Q9CZY3 | UB2V1 | 0,966721694 | 1,033027164 | 1,009625114 | 0,990626028 | 1,155757456 | 1,202929664 | 1,29595954  | 1,131003364 | 1,061369734 | 1,169403952 | 0,007795 |
| Q99JW2 | ACY1  | 1,038765079 | 0,967552276 | 0,972636868 | 1,021045777 | 0,917637358 | 0,649307389 | 0,752208684 | 0,873683289 | 0,780904683 | 0,79474828  | 0,007798 |
| Q8BGU5 | CCNY  | 0,936172654 | 0,963018875 | 1,040738393 | 1,060070078 | 0,857873676 | 0,699144564 | 0,911723511 | 0,84133197  | 0,809895987 | 0,823993942 | 0,007891 |
| O55143 | AT2A2 | 1,066520986 | 1,005641225 | 1,000267899 | 0,92756989  | 1,29207102  | 1,168887097 | 1,084857025 | 1,142754337 | 1,293886192 | 1,196491134 | 0,007898 |
| Q8VEK3 | HNRPU | 0,892317591 | 1,121887104 | 0,985047612 | 1,000747693 | 1,228065886 | 1,25882185  | 1,277197046 | 1,280028034 | 1,614545647 | 1,331731693 | 0,008159 |
| Q9DC70 | NDUS7 | 0,985407578 | 1,01618463  | 0,999520389 | 0,998887403 | 0,867099595 | 0,911793983 | 0,937360667 | 0,874748478 | 0,753865411 | 0,868973627 | 0,008404 |
| Q921G7 | ETFD  | 1,073285787 | 1,060249984 | 0,969685518 | 0,896778711 | 0,811381535 | 0,821710329 | 0,921364162 | 0,757677617 | 0,83585412  | 0,829597553 | 0,008589 |
| P50516 | VATA  | 0,950945133 | 1,021873859 | 1,002879401 | 1,024301608 | 1,093402324 | 1,038487214 | 1,077740697 | 1,083313376 | 1,143117999 | 1,087212322 | 0,008733 |
| Q01853 | TERA  | 0,970566449 | 1,016391586 | 1,014156772 | 0,998885193 | 1,123488901 | 1,08218043  | 1,067181478 | 1,076142029 | 1,209370704 | 1,111672708 | 0,008972 |
| P10639 | THIO  | 0,898803149 | 1,010654077 | 1,134624273 | 0,955918501 | 0,790625363 | 0,887569786 | 0,819618196 | 0,809701105 | 0,706122057 | 0,802727301 | 0,009067 |
| P35279 | RAB6A | 0,92669092  | 0,933099217 | 1,065249506 | 1,074960357 | 1,232319888 | 1,174806216 | 1,432572928 | 1,55704172  | 1,216906374 | 1,322729425 | 0,009238 |
| O35129 | PHB2  | 1,036006317 | 0,967943504 | 0,982325718 | 1,013724461 | 0,936091191 | 0,9208467   | 0,95884887  | 0,906343606 | 0,854665954 | 0,915359264 | 0,009592 |
| O54774 | AP3D1 | 0,743587287 | 1,025370218 | 1,076303044 | 1,154739451 | 1,368540272 | 1,206853918 | 1,247900565 | 1,393041543 | 1,46113614  | 1,335494488 | 0,009607 |
| P62900 | RL31  | 0,857585051 | 1,061210985 | 1,027918422 | 1,053285542 | 0,895799439 | 0,76710643  | 0,854472422 | 0,799981793 | 0,723712354 | 0,808214488 | 0,009817 |
| P53612 | PGTB2 | 1,007916654 | 0,958031328 | 0,856336849 | 1,177715169 | 0,779192998 | 0,823767775 | 0,681492002 | 0,657787328 | 0,474016542 | 0,683251329 | 0,009997 |
| Q60598 | SRC8  | 0,958939986 | 0,988219934 | 1,004243304 | 1,048596775 | 0,86140998  | 0,718922131 | 0,804023753 | 0,719657265 | 0,956728681 | 0,812148362 | 0,010012 |
| P99026 | PSB4  | 0,912976814 | 0,952639631 | 1,124646667 | 1,009736888 | 1,336143462 | 1,076743056 | 1,612630411 | 1,509009536 | 1,398646294 | 1,386634552 | 0,010043 |
| O35864 | CSN5  | 1,01912054  | 0,960552743 | 0,971547412 | 1,048779306 | 0,915584259 | 0,893006922 | 0,855622596 | 0,750120697 | 0,699886093 | 0,822844114 | 0,010149 |
| Q9D6F9 | TBB4A | 1,052505595 | 1,041780621 | 0,948838887 | 0,956874898 | 1,196774335 | 1,072050335 | 1,169730138 | 1,173735073 | 1,069138527 | 1,136285682 | 0,010202 |
| P62204 | CALM  | 0,71588963  | 0,790687804 | 1,502077818 | 0,991344748 | 0,48573376  | 0,447335006 | 0,474066835 | 0,387460463 | 0,474758632 | 0,453870939 | 0,01026  |
| P59999 | ARPC4 | 0,86717292  | 1,00899309  | 1,075009849 | 1,048824141 | 0,817271871 | 0,714930432 | 0,893798035 | 0,836201505 | 0,834820874 | 0,819404543 | 0,01074  |
| Q9EPK7 | XPO7  | 1,091488715 | 0,972784774 | 0,996003241 | 0,939723269 | 0,901656523 | 0,885252644 | 0,836733349 | 0,832377921 | 0,929655917 | 0,877135271 | 0,010809 |
| P70670 | NACAM | 0,984520614 | 1,008868637 | 1,015023062 | 0,991587688 | 0,979199857 | 0,927850487 | 0,946965644 | 0,876275671 | 0,925760415 | 0,931210415 | 0,010855 |
| O88935 | SYN1  | 0,979277764 | 1,018726338 | 1,007050248 | 0,994945649 | 1,141501487 | 1,023873727 | 1,081664589 | 1,071620715 | 1,146072937 | 1,092946691 | 0,010909 |
| Q99MN1 | SYK   | 0,993705105 | 0,982113333 | 0,985413236 | 1,038768326 | 1,16379835  | 1,037732956 | 1,128167628 | 1,130763023 | 1,258314135 | 1,143755218 | 0,010919 |
| Q91ZZ3 | SYUB  | 0,93982665  | 0,994804905 | 1,054756796 | 1,010611649 | 0,854451319 | 0,965323186 | 0,900624326 | 0,819307474 | 0,856271559 | 0,879195573 | 0,011071 |
| Q8BLQ9 | CADM2 | 1,047295505 | 1,01363308  | 1,000110454 | 0,938960962 | 1,149241225 | 1,07840875  | 1,047314891 | 1,119360957 | 1,083753687 | 1,095615902 | 0,011562 |
| Q8C5H8 | NAKD2 | 1,006303918 | 1,109665859 | 0,873428102 | 1,010602122 | 0,819755212 | 0,786814708 | 0,914867042 | 0,802164836 | 0,83699572  | 0,832119504 | 0,011616 |
| Q8R574 | KPRB  | 0,899741041 | 1,036544219 | 0,981701008 | 1,082013733 | 0,831822818 | 0,788042597 | 0,765015343 | 0,886593218 | 0,920337028 | 0,838362201 | 0,011663 |
| Q62420 | SH3G2 | 1,097827973 | 0,955477925 | 0,938473602 | 1,0082205   | 1,195898162 | 1,070177837 | 1,171954142 | 1,139376715 | 1,106356891 | 1,136752749 | 0,011804 |
| P50396 | GDIA  | 0,922081105 | 1,065600901 | 0,989914276 | 1,022403719 | 1,105898541 | 1,054517811 | 1,191673705 | 1,245218717 | 1,215417976 | 1,16254535  | 0,012032 |
| Q8C1A5 | THOP1 | 0,955556571 | 0,968046294 | 0,988329385 | 1,08806775  | 1,15997125  | 1,135754161 | 1,044557951 | 1,166015066 | 1,106051817 | 1,122470049 | 0,012139 |
| P62334 | PRS10 | 0,902204271 | 1,018251057 | 1,053719275 | 1,025825398 | 1,127944492 | 1,064539379 | 1,125511547 | 1,185546419 | 1,112050961 | 1,12311856  | 0,012143 |
| P20108 | PRDX3 | 0,843625502 | 0,858548229 | 1,242244738 | 1,055581532 | 0,738799065 | 0,700334277 | 0,731325811 | 0,751723343 | 0,664825848 | 0,717401669 | 0,012358 |
| O55023 | IMPA1 | 0,938283561 | 0,896306828 | 1,10030248  | 1,065107132 | 0,862866715 | 0,840855996 | 0,878623852 | 0,811724075 | 0,723722584 | 0,823558644 | 0,012705 |
| Q9Z0X1 | AIFM1 | 1,111438547 | 1,01026467  | 0,938031921 | 0,940264862 | 0,929842742 | 0,811375106 | 0,876168469 | 0,764088024 | 0,761149367 | 0,828524741 | 0,012735 |
| Q8BMF4 | ODP2  | 1,021837223 | 1,047326568 | 0,945896641 | 0,984939568 | 0,93579761  | 0,848034682 | 0,931172269 | 0,896393042 | 0,935021261 | 0,909283773 | 0,012812 |
| Q6PIC6 | AT1A3 | 1,047442386 | 1,015961224 | 0,906583313 | 1,030013077 | 1,153965851 | 1,284806088 | 1,119934065 | 1,094347467 | 1,12756107  | 1,156122908 | 0,012969 |
| A2A690 | TANC2 | 0,839512991 | 0,890370853 | 1,179669593 | 1,090446564 | 0,760339554 | 0,718967383 | 0,822175841 | 0,751780078 | 0,723927433 | 0,755438058 | 0,012987 |

|        |       |             |             |             |             |             |             |             |             |             |             |          |
|--------|-------|-------------|-------------|-------------|-------------|-------------|-------------|-------------|-------------|-------------|-------------|----------|
| Q8CAE9 | PDXL2 | 0,944152101 | 1,032003694 | 1,042663373 | 0,981180833 | 0,904252372 | 0,78452632  | 0,759697164 | 0,933827046 | 0,890640016 | 0,854588584 | 0,013192 |
| P12960 | CNTN1 | 0,9737065   | 1,029872167 | 0,983471105 | 1,012950227 | 1,111401759 | 1,092383635 | 1,061581259 | 1,014712273 | 1,114182885 | 1,078852362 | 0,013276 |
| Q9Z1Z2 | STRAP | 1,009088496 | 0,910274212 | 1,094017948 | 0,986619345 | 0,900107712 | 0,79821552  | 0,89624181  | 0,85861062  | 0,72226107  | 0,835087347 | 0,013829 |
| Q99LY9 | NDUS5 | 0,997067113 | 0,958265701 | 1,01478928  | 1,029877906 | 0,818164017 | 0,90922164  | 0,974744998 | 0,78549402  | 0,784710169 | 0,854466969 | 0,014134 |
| Q6P069 | SORCN | 0,957477958 | 1,038010463 | 0,980791142 | 1,023720437 | 0,838798717 | 0,752611168 | 0,972360355 | 0,80648265  | 0,667051416 | 0,807460861 | 0,01434  |
| P47754 | CAZA2 | 0,951754986 | 0,978571089 | 1,003229806 | 1,066444118 | 0,958450378 | 0,896786127 | 0,909690324 | 0,816615068 | 0,862034027 | 0,888715185 | 0,014496 |
| Q3V0K9 | PLSI  | 1,084300363 | 1,12900937  | 1,004913919 | 0,781776348 | 0,833070666 | 0,685297275 | 0,833876473 | 0,69772225  | 0,65607176  | 0,741207685 | 0,014721 |
| P97797 | SHPS1 | 1,025205484 | 0,947352345 | 1,088508386 | 0,938933784 | 0,82854398  | 0,852410534 | 0,750593592 | 0,775321926 | 0,960671642 | 0,833508335 | 0,014808 |
| Q61205 | PA1B3 | 0,880641031 | 0,926583248 | 1,01900526  | 1,173770461 | 0,769544412 | 0,861078743 | 0,826673483 | 0,809882658 | 0,723622308 | 0,798160321 | 0,014845 |
| Q9CZ13 | QCR1  | 1,048758097 | 0,997018413 | 0,973333048 | 0,980890442 | 0,907787519 | 0,895289476 | 0,975607905 | 0,936738556 | 0,937580963 | 0,930600884 | 0,015183 |
| P61087 | UBE2K | 0,959548242 | 0,993570615 | 0,995913964 | 1,05096718  | 0,828756975 | 0,89383211  | 0,936549226 | 0,706379469 | 0,678306773 | 0,808764911 | 0,015189 |
| P47857 | PFKAM | 1,033810364 | 1,038909846 | 0,993615064 | 0,933664725 | 1,12741852  | 1,050006938 | 1,095483447 | 1,053602828 | 1,121632263 | 1,089628799 | 0,015756 |
| P67778 | PHB   | 1,062381525 | 0,985855402 | 0,983458746 | 0,968304327 | 0,906849886 | 0,955057648 | 0,933208956 | 0,842796854 | 0,825878383 | 0,892758346 | 0,016201 |
| P39053 | DYN1  | 0,905026286 | 1,06624099  | 0,994685464 | 1,03404726  | 1,187969647 | 1,05854399  | 1,106181816 | 1,151522932 | 1,24559918  | 1,149963513 | 0,016361 |
| Q61316 | HSP74 | 0,963432325 | 1,057242489 | 0,9919571   | 0,987368086 | 1,103853971 | 1,064490296 | 1,080372679 | 1,035584172 | 1,147575444 | 1,086375312 | 0,017034 |
| P14106 | C1QB  | 0,993185865 | 1,04801382  | 0,991083875 | 0,96771644  | 0,796748139 | 0,886649475 | 0,940018034 | 0,759084164 | 0,934596283 | 0,863419219 | 0,017425 |
| Q9DCN2 | NB5R3 | 0,896807695 | 0,96862821  | 1,093047285 | 1,04151681  | 0,801556318 | 0,905014696 | 0,890486534 | 0,712267756 | 0,655166789 | 0,792898419 | 0,017446 |
| P97427 | DPYL1 | 0,932414089 | 1,042442845 | 1,003819049 | 1,021324017 | 1,10235649  | 1,025666233 | 1,125750134 | 1,199597298 | 1,191131978 | 1,128900427 | 0,017584 |
| P99024 | TBB5  | 1,050592748 | 0,916964265 | 0,965236673 | 1,067206314 | 1,047746349 | 1,180025473 | 1,156481566 | 1,316074341 | 1,187277736 | 1,177521093 | 0,01788  |
| P04925 | PRI0  | 0,985728151 | 0,984658394 | 0,908985088 | 1,120628368 | 1,116380956 | 1,117385105 | 1,362487655 | 1,272311997 | 1,161717695 | 1,206056682 | 0,018027 |
| Q9QVP9 | FAK2  | 0,777924125 | 1,090079205 | 1,055070877 | 1,076925793 | 0,738795001 | 0,586377335 | 0,772196772 | 0,819421988 | 0,828726402 | 0,7491035   | 0,018403 |
| P01942 | HBA   | 1,37016108  | 0,615321758 | 0,931848561 | 1,082668601 | 0,655185043 | 0,653339635 | 0,547207642 | 0,366806182 | 0,457145374 | 0,535936775 | 0,018506 |
| Q99LD4 | CSN1  | 0,996182087 | 1,036306456 | 0,986174893 | 0,981336565 | 1,188189745 | 1,081229784 | 1,012379436 | 1,123886331 | 1,173831019 | 1,115903263 | 0,018535 |
| Q9CZX8 | RS19  | 0,928678982 | 0,855150262 | 1,107339088 | 1,108831668 | 1,264387371 | 1,477223736 | 1,244011812 | 1,18443666  | 1,143379292 | 1,262687774 | 0,018854 |
| Q99LR1 | ABD12 | 1,023777464 | 0,993714993 | 1,013654045 | 0,968853498 | 0,897761265 | 0,904666471 | 1,004104266 | 0,877412559 | 0,900800772 | 0,916949067 | 0,019163 |
| Q9WTX5 | SKP1  | 0,905937159 | 0,952034563 | 1,081171496 | 1,060856782 | 0,865217981 | 0,861380547 | 0,929262091 | 0,795032428 | 0,719882216 | 0,834155052 | 0,019272 |
| Q62433 | NDRG1 | 1,102948012 | 1,094094135 | 0,869980789 | 0,932977064 | 1,273086156 | 1,074716761 | 1,253428522 | 1,319404908 | 1,158501211 | 1,215827512 | 0,019397 |
| Q60631 | GRB2  | 0,998841012 | 1,037336231 | 0,904324759 | 1,059497999 | 1,157806485 | 1,090026227 | 1,163696666 | 1,097195835 | 1,060810179 | 1,113907078 | 0,019451 |
| Q9R0Q7 | TEBP  | 0,96107025  | 0,977282423 | 0,979299671 | 1,082347656 | 0,901969779 | 0,715504005 | 0,950795706 | 0,748330234 | 0,658316125 | 0,79498317  | 0,019645 |
| P15532 | NDKA  | 0,893490315 | 1,037359595 | 1,093807359 | 0,975342732 | 0,870224682 | 0,842778779 | 0,917439592 | 0,876328621 | 0,749159085 | 0,851186152 | 0,019651 |
| P05201 | AATC  | 1,029779164 | 0,886436064 | 1,01903004  | 1,064754732 | 0,916306109 | 0,790581091 | 0,879679779 | 0,915986711 | 0,84135416  | 0,86878157  | 0,020016 |
| P00397 | COX1  | 1,265429552 | 1,003443233 | 0,901926846 | 0,829200369 | 0,818096628 | 0,539082994 | 0,658859238 | 0,647483836 | 0,800863633 | 0,692877266 | 0,020056 |
| P68181 | KAPCB | 0,995596228 | 0,895095032 | 1,110203946 | 0,999104794 | 1,307455778 | 1,145707225 | 1,097302397 | 1,11324884  | 1,28984789  | 1,190712426 | 0,02029  |
| Q9QUP5 | HPLN1 | 0,841477135 | 1,047367559 | 1,058637489 | 1,052517818 | 0,90824425  | 0,894372048 | 0,780932184 | 0,772715358 | 0,783623203 | 0,827977408 | 0,020365 |
| Q8BJH1 | ZC21A | 0,908507889 | 1,024224626 | 1,123080985 | 0,944186501 | 1,101631993 | 1,134262543 | 1,154139887 | 1,110582026 | 1,223951838 | 1,144913657 | 0,020437 |
| Q80WJ7 | LYRIC | 0,883915226 | 1,113580366 | 0,937872042 | 1,064632366 | 0,826411677 | 0,763886693 | 0,855932172 | 0,765908788 | 0,924746626 | 0,827377191 | 0,020783 |
| Q61838 | PZP   | 1,383695262 | 0,8179837   | 0,852357742 | 0,945963296 | 0,797587882 | 0,572995619 | 0,616033802 | 0,488323618 | 0,618899084 | 0,618768001 | 0,020784 |
| Q9Z210 | LETM1 | 0,978188908 | 1,04037356  | 1,049416135 | 0,932021397 | 0,935899734 | 0,930591239 | 0,916498682 | 0,899375149 | 0,937820199 | 0,924037001 | 0,020944 |
| Q8BGZ1 | HPCL4 | 0,800401081 | 0,934205405 | 1,130408412 | 1,134985103 | 1,083915108 | 1,306016387 | 1,593406479 | 1,416065843 | 1,346521492 | 1,349185062 | 0,020957 |
| P08228 | SODC  | 0,783052282 | 0,81136058  | 1,236519924 | 1,169067214 | 0,639256088 | 0,643605902 | 0,786614728 | 0,662903956 | 0,664912313 | 0,679458597 | 0,021015 |

|        |       |             |             |             |             |             |             |             |             |             |             |          |
|--------|-------|-------------|-------------|-------------|-------------|-------------|-------------|-------------|-------------|-------------|-------------|----------|
| Q9QYF9 | NDRG3 | 1,010736111 | 0,974489547 | 1,007253288 | 1,007521054 | 0,958837879 | 0,932165084 | 0,993619949 | 0,957008458 | 0,922365762 | 0,952799426 | 0,021018 |
| Q921I1 | TRFE  | 1,200299    | 0,978056773 | 0,854536688 | 0,967107539 | 0,848195394 | 0,819629817 | 0,79377731  | 0,685750901 | 0,802682672 | 0,790007219 | 0,021026 |
| Q9D710 | TMX2  | 0,993522964 | 0,992720816 | 0,998883899 | 1,014872322 | 0,912914168 | 0,991977114 | 0,867998829 | 0,874039902 | 0,785467565 | 0,886479516 | 0,021039 |
| Q8VDP6 | CDIPT | 0,932573193 | 0,956332887 | 1,157256944 | 0,953836976 | 1,110102178 | 1,129340671 | 1,17325889  | 1,244511117 | 1,135682121 | 1,158578995 | 0,021101 |
| Q9DCS3 | MECR  | 0,92087154  | 1,089798299 | 0,937501901 | 1,05182826  | 0,946933219 | 0,849305263 | 0,761491077 | 0,596489008 | 0,693676228 | 0,769578959 | 0,021223 |
| P84075 | HPCA  | 0,905341857 | 0,957001639 | 0,946102023 | 1,191554481 | 0,645732411 | 0,646802373 | 0,811468173 | 0,864579248 | 0,8563864   | 0,764993721 | 0,021548 |
| Q9DOM1 | KPRA  | 0,97920312  | 0,905756653 | 0,951984307 | 1,16305592  | 0,899349047 | 0,807635309 | 0,839621943 | 0,864492827 | 0,782962842 | 0,838812393 | 0,021583 |
| Q80TZ3 | AUXI  | 0,975398447 | 0,978414588 | 1,017245779 | 1,028941186 | 1,106632318 | 1,065305772 | 1,027211671 | 1,053576664 | 1,152711101 | 1,081087505 | 0,021959 |
| O35136 | NCAM2 | 0,937745908 | 1,011590004 | 1,033675334 | 1,016988754 | 1,171041891 | 1,129233797 | 1,094147986 | 1,013037915 | 1,100082257 | 1,101508769 | 0,022639 |
| O70194 | EIF3D | 0,944504996 | 1,051976328 | 1,012338819 | 0,991179857 | 0,961430088 | 0,950315798 | 0,91965494  | 0,917089275 | 0,932222403 | 0,936142501 | 0,02273  |
| Q9EQF6 | DPYL5 | 0,960971613 | 1,080169279 | 0,906363942 | 1,052495166 | 1,178234225 | 1,12733123  | 1,245535417 | 1,247619531 | 1,034818924 | 1,166707865 | 0,022901 |
| Q6PHN9 | RAB35 | 0,970541981 | 0,98611095  | 0,923627354 | 1,119719716 | 1,045996589 | 1,288466961 | 1,294533978 | 1,223507912 | 1,112867187 | 1,193074525 | 0,023443 |
| P18242 | CATD  | 0,962093041 | 0,988055983 | 1,029339692 | 1,020511285 | 0,728997313 | 0,878652505 | 0,999324485 | 0,803666701 | 0,829477729 | 0,848023746 | 0,023487 |
| P51881 | ADT2  | 1,106923332 | 0,937780593 | 0,977590801 | 0,977705274 | 0,909569041 | 0,928583909 | 0,911751772 | 0,844783842 | 0,810359977 | 0,881009708 | 0,023793 |
| P62827 | RAN   | 0,930302654 | 0,984158278 | 1,048007609 | 1,037531459 | 0,905795708 | 0,824195468 | 0,915717938 | 0,899284712 | 0,960286849 | 0,901056135 | 0,023965 |
| P24288 | BCAT1 | 0,94616751  | 0,955631375 | 1,070711885 | 1,027489229 | 0,907944216 | 0,936561152 | 0,921924997 | 0,901576061 | 0,808825419 | 0,895366369 | 0,024075 |
| P45878 | FKBP2 | 0,938605267 | 1,00756607  | 1,08900613  | 0,964822532 | 1,063510825 | 1,128102002 | 1,11628048  | 1,078202767 | 1,218271092 | 1,120873433 | 0,024108 |
| Q9QZM0 | UBQL2 | 0,868850896 | 1,020704522 | 1,024829458 | 1,085615124 | 0,825626029 | 0,788876649 | 0,780545307 | 0,796845819 | 0,977515418 | 0,833881844 | 0,024372 |
| Q9R0P9 | UCHL1 | 0,917534421 | 0,908712766 | 1,048825016 | 1,124927797 | 0,783259898 | 0,724121198 | 0,962694679 | 0,800388711 | 0,809750679 | 0,816043033 | 0,024403 |
| Q05BC3 | EMAL1 | 1,157372462 | 0,884882067 | 0,905642293 | 1,052103178 | 1,54608096  | 1,285245531 | 1,318169529 | 1,115797564 | 1,1784434   | 1,288747397 | 0,024418 |
| Q99JR1 | SFXN1 | 1,019658182 | 0,998245643 | 1,032637659 | 0,949458516 | 0,851136523 | 0,932802398 | 0,974251374 | 0,937933267 | 0,8765773   | 0,914540173 | 0,024436 |
| Q4VAE3 | TMM65 | 1,001091721 | 1,049440025 | 1,063906639 | 0,885561616 | 0,836061675 | 0,827901564 | 0,82531185  | 0,779373269 | 0,460968126 | 0,745923297 | 0,024469 |
| Q9JII6 | AK1A1 | 0,915703144 | 0,919191653 | 1,119075611 | 1,046029592 | 0,911219336 | 0,753147523 | 0,893194981 | 0,845348493 | 0,718472949 | 0,824276656 | 0,024522 |
| P08113 | ENPL  | 0,97701001  | 1,007222986 | 1,0090052   | 1,006761804 | 0,913102493 | 0,92664795  | 0,975342368 | 0,870908623 | 0,976671042 | 0,932534495 | 0,02458  |
| Q91V92 | ACLY  | 0,928830198 | 1,06058182  | 0,984043085 | 1,026544897 | 1,212769351 | 1,064627076 | 1,064694865 | 1,128246205 | 1,261009157 | 1,146269331 | 0,024631 |
| P02088 | HBB1  | 1,412300037 | 0,697448865 | 0,89150046  | 0,998750638 | 0,739622439 | 0,645135636 | 0,579721957 | 0,46201447  | 0,545992355 | 0,594497371 | 0,025032 |
| Q60865 | CAPR1 | 1,145016518 | 0,396396721 | 1,46700868  | 0,991578082 | 1,522475779 | 1,335189768 | 1,650366114 | 1,869179489 | 1,77890575  | 1,63122338  | 0,025935 |
| Q8VDD5 | MYH9  | 0,924055554 | 1,104136663 | 0,952043539 | 1,019764245 | 0,864189394 | 0,879628267 | 0,881492324 | 0,72649605  | 0,9218031   | 0,854721827 | 0,026263 |
| P62983 | RS27A | 0,936162162 | 1,072406616 | 1,005652007 | 0,985779215 | 0,980024951 | 0,901216075 | 0,890110842 | 0,885859876 | 0,897860842 | 0,911014517 | 0,026328 |
| Q60996 | 2A5G  | 0,945375857 | 0,976251214 | 0,987279641 | 1,091093289 | 1,140934482 | 1,149816869 | 1,137577498 | 1,09688131  | 1,019687995 | 1,108979631 | 0,026681 |
| D3Z7P3 | GLSK  | 0,955402786 | 0,972956979 | 1,052116652 | 1,019523582 | 1,047426987 | 1,031375082 | 1,076225995 | 1,124896577 | 1,113165731 | 1,078618074 | 0,02696  |
| Q8VDN2 | AT1A1 | 1,016445218 | 0,977569294 | 1,062172499 | 0,943812989 | 1,146323342 | 1,051171253 | 1,074857097 | 1,074878233 | 1,212103058 | 1,111866597 | 0,027873 |
| P70372 | ELAV1 | 0,881480883 | 1,005674491 | 1,040763368 | 1,072081259 | 0,954533823 | 0,84845923  | 0,892020788 | 0,853867873 | 0,860532538 | 0,88188285  | 0,02846  |
| O35643 | AP1B1 | 0,98676354  | 1,00471116  | 1,015434008 | 0,993091292 | 1,12434328  | 0,98336469  | 1,09692343  | 1,172978296 | 1,176603765 | 1,110842692 | 0,028557 |
| Q9CPU0 | LGUL  | 0,986103864 | 0,870466575 | 0,987104878 | 1,156324683 | 0,79336225  | 0,780328873 | 0,946771268 | 0,831799794 | 0,697988002 | 0,810050037 | 0,028691 |
| P18760 | COF1  | 0,952045097 | 1,034091191 | 0,952252891 | 1,061610821 | 1,060899788 | 1,108576953 | 1,035272026 | 1,134822825 | 1,096197334 | 1,087153785 | 0,028894 |
| P23492 | PNPH  | 1,050350716 | 0,884335612 | 0,961309846 | 1,104003826 | 0,884353478 | 0,889780695 | 0,890960517 | 0,738856273 | 0,668241892 | 0,814438571 | 0,02923  |
| Q99JI6 | RAP1B | 0,93278354  | 0,985753161 | 0,973569648 | 1,10789365  | 1,036662496 | 1,157553123 | 1,376276679 | 1,45162634  | 1,219693391 | 1,248362406 | 0,029284 |
| Q791V5 | MTCH2 | 1,042467515 | 0,984200726 | 0,973993156 | 0,999338603 | 0,91669373  | 0,953830045 | 0,96984193  | 0,875752782 | 0,815569594 | 0,906337616 | 0,029306 |
| Q9CXZ1 | NDUS4 | 1,041964567 | 0,982057168 | 0,937598072 | 1,038380193 | 0,801940422 | 0,856315351 | 1,008855924 | 0,785408533 | 0,698744452 | 0,830252936 | 0,029334 |

|        |       |             |             |             |             |             |             |             |             |             |             |          |
|--------|-------|-------------|-------------|-------------|-------------|-------------|-------------|-------------|-------------|-------------|-------------|----------|
| P49615 | CDK5  | 1,008594843 | 0,901634503 | 1,008605135 | 1,08116552  | 0,868360049 | 0,934742839 | 0,931008425 | 0,786843585 | 0,74945286  | 0,854081552 | 0,029426 |
| O08547 | SC22B | 0,975900877 | 0,998095688 | 1,004552492 | 1,021450942 | 1,06151424  | 1,07279953  | 1,39677777  | 1,28438021  | 1,177934403 | 1,19868123  | 0,029587 |
| Q62443 | NPTX1 | 0,967962077 | 0,905141418 | 1,028203367 | 1,098693138 | 0,839442811 | 0,684701189 | 0,992695985 | 0,778874207 | 0,774520331 | 0,814046904 | 0,029723 |
| Q3U1J4 | DDB1  | 0,922947279 | 1,084922056 | 0,990864369 | 1,001266297 | 0,920373932 | 0,880931164 | 0,866951375 | 0,858741775 | 0,969685993 | 0,899336848 | 0,030747 |
| Q99P72 | RTN4  | 1,044532128 | 1,025920629 | 0,978415007 | 0,951132236 | 1,218965369 | 1,073380785 | 1,077815817 | 1,05402439  | 1,093479955 | 1,103533263 | 0,030858 |
| P13595 | NCAM1 | 0,909773664 | 1,084660789 | 0,942525377 | 1,06304017  | 1,055801304 | 1,110798276 | 1,111073803 | 1,152161362 | 1,139278749 | 1,113822699 | 0,031599 |
| Q8BTG7 | NDRG4 | 0,927907697 | 1,057957596 | 1,017925495 | 0,996209212 | 1,17556568  | 0,991098167 | 1,361402507 | 1,187522096 | 1,267834868 | 1,196684664 | 0,031612 |
| Q8R164 | BPHL  | 0,95914469  | 0,976815316 | 1,037200721 | 1,026839272 | 1,021749476 | 1,083054375 | 1,078583111 | 1,052390963 | 1,043634502 | 1,055882486 | 0,032707 |
| Q9CY27 | TECR  | 1,095045411 | 1,037518324 | 0,866201125 | 1,001235141 | 0,930160817 | 0,854022968 | 0,866503125 | 0,768138792 | 0,889046565 | 0,861574453 | 0,033196 |
| Q9D0I9 | SYRC  | 0,98480924  | 1,083622317 | 0,963447365 | 0,968121078 | 0,90723248  | 0,896764679 | 0,930167463 | 0,827532446 | 0,966626678 | 0,905664749 | 0,034125 |
| P16858 | G3P   | 0,962965479 | 1,045915666 | 0,971509505 | 1,019609349 | 1,08437592  | 1,060121774 | 1,073727164 | 1,049048208 | 1,01746461  | 1,056947535 | 0,03434  |
| Q6Q477 | AT2B4 | 0,780903516 | 0,986762343 | 1,231941565 | 1,000392577 | 1,203675457 | 1,14896592  | 1,225524061 | 1,298776862 | 1,477407768 | 1,270870014 | 0,034637 |
| P06151 | LDHA  | 1,013254293 | 0,925257986 | 1,011688642 | 1,049799078 | 0,976427614 | 0,92310254  | 0,881132528 | 0,831987082 | 0,762232187 | 0,87497639  | 0,034711 |
| Q64521 | GPDM  | 0,863381095 | 1,080793582 | 1,010933985 | 1,044891339 | 0,859758415 | 0,859737803 | 0,914694225 | 0,892209812 | 0,902029315 | 0,885685914 | 0,034877 |
| Q60771 | CLD11 | 1,020304495 | 1,152587749 | 0,935989752 | 0,891118004 | 1,222087735 | 1,531134452 | 1,585409615 | 1,152636659 | 1,111851807 | 1,320624053 | 0,035152 |
| P28738 | KIF5C | 0,916919192 | 1,096407838 | 0,960757547 | 1,025915424 | 1,186710379 | 1,040920929 | 1,066246694 | 1,153468633 | 1,186918559 | 1,126853039 | 0,036035 |
| Q80UJ7 | RB3GP | 1,07174297  | 0,962775031 | 1,010108395 | 0,955373604 | 0,938457019 | 0,924459736 | 0,756860611 | 0,821152926 | 0,937928689 | 0,875771796 | 0,036183 |
| Q9CQ89 | CUTA  | 0,85970381  | 0,929827955 | 1,233384414 | 0,97708382  | 0,564994287 | 0,060597282 | 0,772660053 | 0,737948188 | 0,716260751 | 0,570492112 | 0,036262 |
| P50114 | S100B | 0,851345039 | 0,922019717 | 1,240925627 | 0,985709617 | 0,669509373 | 0,457947191 | 0,820619156 | 0,904882412 | 0,682366492 | 0,707064925 | 0,037158 |
| Q9D8E6 | RL4   | 0,943085472 | 1,020830883 | 0,997825223 | 1,038258422 | 0,927134663 | 0,88098847  | 0,985340434 | 0,887805305 | 0,951045014 | 0,926462777 | 0,037222 |
| O88456 | CPNS1 | 0,978713556 | 1,031068399 | 0,864015425 | 1,12620262  | 1,17120846  | 1,271268397 | 1,198175585 | 1,140429531 | 1,041574409 | 1,164531276 | 0,03739  |
| P49442 | INPP  | 0,974785176 | 0,935218134 | 1,000856242 | 1,089140448 | 0,901136777 | 0,792354182 | 0,845526408 | 0,990656287 | 0,868619098 | 0,87965855  | 0,037747 |
| Q0GNC1 | INF2  | 0,83477556  | 1,21645094  | 0,92294748  | 1,025826021 | 1,384884969 | 1,132333989 | 1,100925499 | 1,30421892  | 1,487706233 | 1,282013922 | 0,03776  |
| P27048 | RSMB  | 0,898629474 | 1,031302167 | 1,038325147 | 1,031743213 | 0,887064572 | 0,847697115 | 0,990615338 | 0,876187335 | 0,881068725 | 0,896526617 | 0,038376 |
| Q62425 | NDUA4 | 0,946190406 | 1,035412954 | 1,055435734 | 0,962960906 | 0,882405974 | 0,918409254 | 0,944837439 | 0,9742833   | 0,863966362 | 0,916780466 | 0,038508 |
| Q9CZC8 | SCRN1 | 1,004522088 | 0,870100473 | 1,095450801 | 1,029926638 | 0,880060105 | 0,848414428 | 0,930926402 | 0,898687852 | 0,879727577 | 0,887563273 | 0,038838 |
| Q11136 | PEPD  | 0,909354545 | 0,816508928 | 1,06754561  | 1,206590917 | 0,874737706 | 0,605025032 | 0,806444152 | 0,753251852 | 0,801463968 | 0,768184542 | 0,038845 |
| P32067 | LA    | 0,881682733 | 0,996392825 | 1,130967265 | 0,990957176 | 0,770989063 | 0,652518671 | 0,914728398 | 0,92054942  | 0,827305425 | 0,817218195 | 0,038881 |
| Q8K0D5 | EFGM  | 0,962547922 | 1,051885538 | 1,094270034 | 0,891296505 | 1,139956628 | 1,119283    | 1,129432888 | 1,086207065 | 1,065719332 | 1,108119783 | 0,039897 |
| Q9JJK7 | TMOD2 | 1,007887665 | 1,009871114 | 0,994519758 | 0,987721464 | 0,974526505 | 0,93359083  | 0,972922819 | 0,991871771 | 0,914978407 | 0,957578066 | 0,040162 |
| Q5SRX1 | TM1L2 | 0,987965322 | 0,991084899 | 1,046980127 | 0,973969653 | 0,91913938  | 0,865288504 | 1,00479508  | 0,937120375 | 0,897680281 | 0,924804724 | 0,04044  |
| P17426 | AP2A1 | 0,965852564 | 1,015516031 | 1,027703429 | 0,990927976 | 1,059096444 | 1,034624906 | 1,049985181 | 1,051853484 | 1,16040467  | 1,071192937 | 0,040445 |
| P11499 | HS90B | 0,953572271 | 1,105152777 | 0,952367801 | 0,988907151 | 1,098160191 | 1,111021974 | 1,05776572  | 1,052963512 | 1,132611793 | 1,090504638 | 0,040814 |
| P17427 | AP2A2 | 0,965659744 | 0,972579426 | 1,031504521 | 1,030256309 | 1,09542471  | 1,046588192 | 1,067218485 | 1,121390008 | 1,273874338 | 1,120899146 | 0,040816 |
| Q04447 | KCRB  | 0,923501102 | 0,828364851 | 1,258684253 | 0,989449794 | 0,864340077 | 0,709118725 | 0,716658999 | 0,824837972 | 0,783698018 | 0,779730758 | 0,040841 |
| Q8VEM8 | MPCP  | 1,138852058 | 0,980543413 | 0,964139317 | 0,916465211 | 0,890465237 | 0,933303757 | 0,897318296 | 0,863851449 | 0,837785702 | 0,884544888 | 0,040848 |
| Q8C0L0 | TMX4  | 0,942647905 | 0,936205748 | 1,084309687 | 1,03683666  | 0,945387881 | 0,829427456 | 0,927975169 | 0,893013736 | 0,914956098 | 0,902152068 | 0,041204 |
| Q99020 | ROAA  | 0,924321157 | 0,992724171 | 1,060108369 | 1,022846303 | 0,940008921 | 0,654356989 | 0,862027778 | 0,827738717 | 0,925864986 | 0,841999478 | 0,041277 |
| P23927 | CRYAB | 0,934084881 | 1,084102423 | 0,828262963 | 1,153549732 | 1,210264782 | 1,293307343 | 1,375994014 | 1,194368851 | 1,045597308 | 1,22390646  | 0,041299 |
| P21619 | LMNB2 | 0,940573941 | 0,987843963 | 1,080278179 | 0,991303917 | 0,878595187 | 0,792841847 | 0,94015674  | 0,787282826 | 0,975941885 | 0,874963697 | 0,041339 |

|        |       |             |             |             |             |             |             |             |             |             |             |          |
|--------|-------|-------------|-------------|-------------|-------------|-------------|-------------|-------------|-------------|-------------|-------------|----------|
| P62838 | UB2D2 | 0,890480476 | 1,095527039 | 1,098778616 | 0,915213868 | 0,844166184 | 0,890453039 | 0,918292375 | 0,865635891 | 0,817567066 | 0,867222911 | 0,041565 |
| P14685 | PSMD3 | 0,978301843 | 0,958501139 | 1,011618869 | 1,051578148 | 1,096029386 | 1,013978618 | 1,210242031 | 1,144558276 | 1,061525993 | 1,105266861 | 0,041821 |
| P58389 | PTPA  | 0,958220396 | 1,031235217 | 0,971715458 | 1,03882893  | 0,996240916 | 0,915037582 | 0,921105271 | 0,884482377 | 0,811247007 | 0,905622631 | 0,043558 |
| Q6P1F6 | ZABA  | 0,968211237 | 0,999575368 | 1,06854729  | 0,963666104 | 1,053176594 | 1,004364346 | 1,137776832 | 1,176471699 | 1,179079403 | 1,110173775 | 0,043913 |
| Q3UGR5 | HDHD2 | 1,077755117 | 0,875839006 | 0,985977914 | 1,060427963 | 0,925714756 | 0,632595887 | 0,894991018 | 0,887368661 | 0,723884091 | 0,812910882 | 0,044147 |
| Q9EPJ9 | ARFG1 | 1,042789356 | 0,922520479 | 1,032078402 | 1,002611763 | 0,996933529 | 0,861012586 | 0,854358039 | 0,913146786 | 0,914840818 | 0,908058352 | 0,044219 |
| O88343 | S4A4  | 0,890533455 | 1,190128432 | 0,938331158 | 0,981006955 | 1,245551458 | 1,138007193 | 1,189404789 | 1,081938978 | 1,14773734  | 1,160527952 | 0,044611 |
| P70168 | IMB1  | 0,996892663 | 1,059342248 | 0,998511373 | 0,945253716 | 1,068768954 | 1,033856521 | 1,05513955  | 1,047838249 | 1,122927455 | 1,065706146 | 0,044612 |
| Q91VM9 | IPYR2 | 0,996854827 | 0,997106716 | 0,995551182 | 1,010487275 | 0,952407564 | 0,560354298 | 0,915112732 | 0,814851221 | 0,811072867 | 0,810759736 | 0,044975 |
| P22892 | AP1G1 | 0,961220107 | 1,02635819  | 0,991209033 | 1,02121267  | 0,97652765  | 0,911177941 | 0,927451955 | 0,88740882  | 0,988422236 | 0,93819772  | 0,046071 |
| O70133 | DHX9  | 0,94439966  | 1,121000024 | 1,038633784 | 0,895966532 | 0,816032781 | 0,732207176 | 0,752285698 | 0,949764483 | 0,93426631  | 0,83691129  | 0,046294 |
| Q8BP92 | RCN2  | 0,952546585 | 0,9993924   | 1,077268491 | 0,970792524 | 0,829526106 | 1,012985685 | 0,901369133 | 0,79599798  | 0,873722724 | 0,882720326 | 0,046742 |
| P70195 | PSB7  | 1,034509975 | 0,692489722 | 1,045871388 | 1,227128914 | 0,869459061 | 0,698355193 | 0,61614233  | 0,53866064  | 0,041944617 | 0,552912369 | 0,046889 |
| Q8BH66 | ATLA1 | 1,02436014  | 1,096344495 | 0,981083222 | 0,898212143 | 0,83795114  | 0,890982688 | 0,97968586  | 0,891503331 | 0,837639187 | 0,887552441 | 0,047256 |
| Q9JI46 | NUDT3 | 0,789433205 | 0,914016432 | 1,363284919 | 0,933265445 | 0,679168475 | 0,535235128 | 0,729916917 | 0,84913417  | 0,717957682 | 0,702282475 | 0,047398 |
| Q3UJU9 | RMD3  | 1,025951979 | 1,062088935 | 1,02276254  | 0,889196546 | 0,889852463 | 0,957661136 | 0,84751716  | 0,916818044 | 0,917454501 | 0,905860661 | 0,047426 |
| P62082 | RS7   | 0,864368117 | 0,956541631 | 1,045330801 | 1,133759451 | 0,858878849 | 0,747284969 | 0,949205979 | 0,823179961 | 0,867246176 | 0,849159187 | 0,047832 |
| P63028 | TCTP  | 0,998685207 | 1,000229177 | 0,998892809 | 1,002192807 | 0,967729669 | 0,987432948 | 0,982018688 | 0,936548849 | 0,896008597 | 0,95394775  | 0,048039 |
| P17751 | TPIS  | 0,882751791 | 0,851369476 | 1,103790909 | 1,162087824 | 0,728117321 | 0,874559526 | 0,869990973 | 0,82960754  | 0,803667141 | 0,8211885   | 0,048248 |
| Q8VDM4 | PSMD2 | 0,879259576 | 1,026979798 | 1,059589169 | 1,034171456 | 1,075581766 | 1,041211422 | 1,110733293 | 1,1221289   | 1,169274229 | 1,103785922 | 0,048387 |
| Q8QZS1 | HIBCH | 0,94893495  | 1,054856811 | 0,958327554 | 1,037880685 | 1,108506334 | 1,025851418 | 1,069143376 | 1,204996699 | 1,084092144 | 1,098517994 | 0,048636 |
| Q9D5V5 | CUL5  | 0,885655736 | 1,042324821 | 1,038292747 | 1,033726696 | 0,884911873 | 0,813221817 | 0,886435397 | 0,862815698 | 0,992517611 | 0,887980479 | 0,049308 |
| Q9CRB9 | MIC19 | 0,94340385  | 0,958928993 | 1,114556451 | 0,983110706 | 0,930684698 | 0,868924569 | 0,971444547 | 0,776595566 | 0,75426303  | 0,860382482 | 0,049519 |
| Q7TQJ3 | OTUB1 | 0,936105927 | 1,033488138 | 1,011748918 | 1,018657017 | 0,988206266 | 0,906942336 | 0,937247813 | 0,869451355 | 0,783883741 | 0,897146302 | 0,049559 |
| Q6IRU5 | CLCB  | 0,927305948 | 0,993758195 | 1,030093961 | 1,048841895 | 0,97677018  | 0,840859088 | 0,925382934 | 0,919055323 | 0,763093597 | 0,885032224 | 0,04968  |
| Q9CPQ3 | TOM22 | 1,02179713  | 0,921434907 | 1,086678006 | 0,970089956 | 1,194934148 | 1,102489476 | 1,847436166 | 1,38092124  | 1,263086049 | 1,357773416 | 0,049978 |
| P03888 | NU1M  | 1,209704556 | 0,99801048  | 0,948731595 | 0,843553369 | 0,929356467 | 0,851321916 | 0,727165485 | 0,741573597 | 0,810141091 | 0,811911711 | 0,050126 |
| Q922D8 | C1TC  | 0,940353527 | 1,130422684 | 0,954280474 | 0,974943315 | 1,091102597 | 1,206653039 | 1,086001183 | 1,046708012 | 1,193691901 | 1,124831346 | 0,050239 |
| Q9QUM9 | PSA6  | 0,882515333 | 0,956778825 | 1,085756236 | 1,074949606 | 0,93751653  | 0,934912738 | 0,801001091 | 0,848569322 | 0,700936015 | 0,844587139 | 0,051028 |
| Q9JLN9 | MTOR  | 0,829901466 | 0,96156062  | 1,183470893 | 1,025067021 | 0,86833255  | 0,540346354 | 0,768239303 | 0,786420122 | 0,90343181  | 0,773354028 | 0,051356 |
| P61329 | FGF12 | 1,010665596 | 0,969673419 | 1,00926428  | 1,010396706 | 0,922655694 | 0,835301162 | 1,0156697   | 0,93314916  | 0,883029374 | 0,917961018 | 0,051657 |
| Q8QZY1 | EIF3L | 0,853015738 | 1,09341774  | 0,996542087 | 1,057024434 | 0,798732895 | 0,399285069 | 0,789271766 | 0,974040366 | 0,661850066 | 0,724636032 | 0,051783 |
| P97807 | FUMH  | 1,041302825 | 0,989822468 | 0,967049829 | 1,001824879 | 0,933270264 | 0,940765637 | 1,001673043 | 0,956366633 | 0,936232763 | 0,953661668 | 0,051798 |
| P12658 | CALB1 | 0,946566572 | 0,982455077 | 0,98855365  | 1,082424701 | 0,815495603 | 0,889969863 | 0,931908595 | 0,996265289 | 0,858728813 | 0,898473632 | 0,051917 |
| Q61234 | SNTA1 | 0,984973426 | 0,96705738  | 0,987870296 | 1,060098898 | 0,995131165 | 0,924210585 | 0,92925603  | 0,937424347 | 0,859946204 | 0,929193666 | 0,052238 |
| P28474 | ADHX  | 1,014330182 | 0,961006073 | 0,97344504  | 1,051218704 | 1,033802    | 0,905015111 | 0,849167512 | 0,816518247 | 0,810736227 | 0,883047819 | 0,052327 |
| Q99KJ8 | DCTN2 | 0,962658958 | 1,129921897 | 0,854768726 | 1,052650419 | 1,20434199  | 1,089018998 | 1,12227886  | 1,122541725 | 1,11979551  | 1,131595417 | 0,052489 |
| Q8K274 | KT3K  | 1,034759263 | 0,923857607 | 0,901593959 | 1,13978917  | 0,832695171 | 0,948746584 | 0,925162955 | 0,752597152 | 0,724930993 | 0,836826571 | 0,052497 |
| P63163 | RSMN  | 0,888922337 | 0,988522351 | 1,040770208 | 1,081785104 | 0,911667422 | 0,834249747 | 0,973898005 | 0,896530253 | 0,849843283 | 0,893237742 | 0,053668 |
| Q62348 | TSN   | 0,856842109 | 0,928556123 | 1,056033767 | 1,158568001 | 0,847863831 | 0,799562145 | 0,927307884 | 0,882154482 | 0,757507147 | 0,842879098 | 0,0539   |

|        |       |             |             |             |             |             |             |             |             |             |             |          |
|--------|-------|-------------|-------------|-------------|-------------|-------------|-------------|-------------|-------------|-------------|-------------|----------|
| Q00493 | CBPE  | 0,902993086 | 1,042787543 | 1,001398813 | 1,052820558 | 0,889993147 | 0,816781211 | 0,95614139  | 0,931999418 | 0,932501415 | 0,905483316 | 0,054534 |
| Q8BG7  | ENOPH | 0,949159057 | 0,948925301 | 1,101075237 | 1,000840405 | 0,953093705 | 0,904329267 | 0,927779566 | 0,839462581 | 0,719726066 | 0,868878237 | 0,054592 |
| P09411 | PGK1  | 0,994734844 | 0,939261727 | 1,017775107 | 1,048228322 | 0,916621101 | 0,846784547 | 0,952534844 | 0,988553078 | 0,908042365 | 0,922507187 | 0,054684 |
| Q8BGQ7 | SYAC  | 0,943368301 | 1,078905274 | 0,983991353 | 0,993735071 | 1,041097843 | 1,026580647 | 1,110061327 | 1,077555836 | 1,128708716 | 1,076800874 | 0,054896 |
| Q9DCP2 | S38A3 | 1,135639827 | 0,901136366 | 1,003881409 | 0,959342398 | 0,920280656 | 0,972326019 | 0,813984895 | 0,738943466 | 0,812616983 | 0,851630404 | 0,055029 |
| O35678 | MGLL  | 1,070836794 | 1,345502704 | 0,205391376 | 1,378269126 | 1,630574708 | 1,496041926 | 1,857492893 | 1,521208169 | 1,425618219 | 1,586187183 | 0,055191 |
| P10630 | IF4A2 | 0,934231044 | 1,002144646 | 1,07971526  | 0,983909049 | 0,826202068 | 0,90344859  | 0,972329695 | 0,96094365  | 0,860987453 | 0,904782291 | 0,055322 |
| Q99J99 | THTM  | 1,008712035 | 0,975728355 | 1,011264317 | 1,004295294 | 1,045094791 | 0,837204718 | 0,824924044 | 0,911491026 | 0,804779178 | 0,884698751 | 0,055893 |
| P62317 | SMD2  | 0,815149972 | 0,982162512 | 1,139729399 | 1,062958117 | 0,887531437 | 0,804524928 | 0,94424685  | 0,724348817 | 0,77282225  | 0,826694856 | 0,056095 |
| Q9CQ54 | NDUC2 | 0,8720636   | 0,984443163 | 1,145897547 | 0,997595691 | 0,787553228 | 0,852403036 | 0,932247469 | 0,826225425 | 0,928514294 | 0,86538869  | 0,056452 |
| Q6X893 | CTL1  | 1,018968243 | 1,06482115  | 0,935655669 | 0,980554938 | 1,020934259 | 1,0860458   | 1,170115967 | 1,12559283  | 1,041366702 | 1,088811112 | 0,057876 |
| P05202 | AATM  | 1,038357548 | 1,004890081 | 0,978798056 | 0,977954315 | 1,022043631 | 0,930800692 | 0,92372087  | 0,895329341 | 0,874387904 | 0,929256488 | 0,058286 |
| P05064 | ALDOA | 0,976878108 | 1,064102121 | 0,946647473 | 1,012372298 | 1,09644077  | 1,028047895 | 1,04658246  | 1,070970195 | 1,049227119 | 1,058253688 | 0,058879 |
| Q7TQD2 | TPPP  | 1,104149666 | 1,042746585 | 0,849875665 | 1,003228084 | 1,153726488 | 1,216131739 | 1,119435872 | 1,17652798  | 1,018812029 | 1,136926822 | 0,059186 |
| Q8BG51 | MIRO1 | 0,956307466 | 1,102079518 | 0,959427062 | 0,982185954 | 0,897028422 | 0,800622136 | 0,926837439 | 0,967795003 | 0,917268985 | 0,901910397 | 0,059895 |
| Q9WTT4 | VATG2 | 0,824066749 | 0,978432138 | 1,049401404 | 1,148099709 | 1,208753063 | 1,121815427 | 1,353437956 | 1,168133796 | 1,063213398 | 1,183070728 | 0,059996 |
| P61082 | UBC12 | 0,90532134  | 1,038894992 | 1,041021019 | 1,014762649 | 0,811340977 | 0,919023919 | 1,010128621 | 0,863779598 | 0,754516905 | 0,871758004 | 0,060529 |
| Q922R8 | PDIA6 | 0,957176039 | 1,069675497 | 0,999797773 | 0,973350691 | 0,913628784 | 0,920688349 | 0,960325344 | 0,969927086 | 0,954049456 | 0,943723804 | 0,060944 |
| Q61035 | SYHC  | 0,930944043 | 0,992348457 | 1,039209644 | 1,037497855 | 0,908379486 | 0,891591263 | 1,007028744 | 0,902946462 | 0,791275444 | 0,90024428  | 0,061191 |
| P59325 | IF5   | 0,989502231 | 1,053128966 | 1,01116704  | 0,946201763 | 0,997675595 | 0,722089005 | 0,894097735 | 0,926869587 | 0,832843092 | 0,874715003 | 0,061207 |
| Q3UU13 | THEM4 | 1,267008318 | 1,116369225 | 0,01896691  | 1,597655546 | 1,463774713 | 1,516439651 | 1,799476672 | 2,034097007 | 1,776985002 | 1,718154609 | 0,061373 |
| P48453 | PP2BB | 0,829570001 | 1,001783659 | 1,139537147 | 1,029109193 | 0,883353539 | 0,751277565 | 0,847198852 | 0,955979225 | 0,795338571 | 0,846629551 | 0,062085 |
| P12970 | RL7A  | 0,903392199 | 0,996520753 | 1,080470719 | 1,019616329 | 0,946104617 | 0,951563152 | 0,938275124 | 0,836005364 | 0,828278884 | 0,900045428 | 0,062391 |
| P63213 | GBG2  | 0,828546511 | 1,052993259 | 1,075207689 | 1,043252542 | 1,050666085 | 1,145088902 | 1,146187368 | 1,145668791 | 1,11712664  | 1,120947557 | 0,062635 |
| Q60931 | VDAC3 | 1,056693388 | 0,946481376 | 1,016329398 | 0,980495838 | 0,88162449  | 1,012292031 | 0,93029587  | 0,785896036 | 0,750692969 | 0,872160279 | 0,06275  |
| Q9CPU4 | MGST3 | 1,053416778 | 0,959247733 | 1,121004265 | 0,866331224 | 0,965493209 | 0,805895432 | 0,86698631  | 0,890944577 | 0,834062646 | 0,872676435 | 0,063439 |
| Q8R0F8 | FAHD1 | 1,011911351 | 1,074293824 | 0,983797229 | 0,929997596 | 0,867667872 | 0,954602919 | 0,969202294 | 0,907916592 | 0,933353894 | 0,926548714 | 0,063442 |
| Q9QY76 | VAPB  | 1,003334551 | 1,063860569 | 0,972136992 | 0,960667888 | 1,148840751 | 1,134360148 | 1,123003501 | 1,056912939 | 0,982871794 | 1,089197827 | 0,063443 |
| Q9DBF1 | AL7A1 | 1,003184653 | 1,03412285  | 0,98529993  | 0,977392567 | 1,048176038 | 1,200042269 | 1,080908648 | 1,039391556 | 1,034556434 | 1,080614989 | 0,064479 |
| P06745 | G6PI  | 1,043407064 | 0,982544298 | 0,932948588 | 1,04110005  | 1,009446663 | 1,053472364 | 1,099186437 | 1,151914581 | 1,074074069 | 1,077618823 | 0,065009 |
| P24527 | LKHA4 | 0,984865017 | 1,043938333 | 1,039747321 | 0,931449329 | 1,00974211  | 1,070763424 | 1,062282288 | 1,072631066 | 1,088893327 | 1,060862443 | 0,065219 |
| Q99N28 | CADM3 | 0,94996547  | 1,009707469 | 1,058887116 | 0,981439945 | 1,107235898 | 1,095622638 | 1,07994339  | 0,979713532 | 1,114535819 | 1,075410255 | 0,065225 |
| Q91XV3 | BASP1 | 0,928931192 | 1,126078169 | 0,909546846 | 1,035443793 | 1,017986867 | 1,339663959 | 1,035900459 | 1,402129144 | 1,319890523 | 1,223114191 | 0,06536  |
| Q9DB05 | SNAA  | 1,034735466 | 0,996754644 | 0,957174476 | 1,011335414 | 0,957568988 | 0,95449011  | 0,959899011 | 0,851733642 | 0,760567419 | 0,896851834 | 0,06548  |
| Q8K3J1 | NDUS8 | 1,053410423 | 1,003169336 | 0,940885587 | 1,002534654 | 0,836150192 | 0,798882366 | 1,004284009 | 0,965042149 | 0,866123511 | 0,894096445 | 0,065737 |
| Q9CQ69 | QCR8  | 0,924420104 | 1,064754058 | 1,077818778 | 0,933007061 | 0,770967021 | 0,940112909 | 0,980015456 | 0,846220871 | 0,863146852 | 0,880092622 | 0,066354 |
| Q8BW75 | AOFB  | 1,073695674 | 1,092979027 | 1,007330794 | 0,825994506 | 1,085977135 | 1,072204081 | 1,189989616 | 1,1170873   | 1,193708778 | 1,131793382 | 0,066832 |
| Q9JJK2 | LANC2 | 0,990389559 | 0,973042683 | 1,061756627 | 0,974811131 | 1,011770766 | 0,878249759 | 0,941179761 | 0,863601053 | 0,926717226 | 0,924303713 | 0,067101 |
| P14131 | RS16  | 0,895604944 | 1,048647726 | 1,028644903 | 1,027102427 | 0,851603695 | 0,771163353 | 1,033532305 | 0,880313903 | 0,829421932 | 0,873207038 | 0,067147 |
| Q9QUI0 | RHOA  | 0,860839396 | 0,964862221 | 1,089084053 | 1,085214331 | 0,978040992 | 1,165467363 | 1,366909664 | 1,233928126 | 1,183684127 | 1,185606054 | 0,067268 |



|         |       |             |             |             |             |             |             |             |             |             |             |          |
|---------|-------|-------------|-------------|-------------|-------------|-------------|-------------|-------------|-------------|-------------|-------------|----------|
| Q78IK2  | USMG5 | 0,878720722 | 0,968010502 | 1,191915349 | 0,961353427 | 0,761932388 | 0,884765967 | 0,949732358 | 0,846140351 | 0,811000181 | 0,850714249 | 0,067894 |
| Q9R0X4  | ACOT9 | 0,996758076 | 0,981125647 | 1,031060015 | 0,991056261 | 0,966417526 | 0,930066925 | 0,961361568 | 1,005102479 | 0,904916091 | 0,953572918 | 0,067996 |
| Q9CR67  | TMM33 | 0,911083304 | 1,094958201 | 1,026019828 | 0,967938667 | 0,963597734 | 0,946148846 | 0,913541548 | 0,865173852 | 0,826346977 | 0,902961791 | 0,068242 |
| Q9DCZ1  | GMPR1 | 1,057931035 | 1,107294261 | 0,931130036 | 0,903644667 | 0,900836921 | 0,85428372  | 0,900130432 | 0,966920522 | 0,776591492 | 0,879752617 | 0,068582 |
| P62137  | PP1A  | 0,949694942 | 0,947676301 | 1,085304102 | 1,017324654 | 1,027057577 | 0,872150806 | 0,835681271 | 0,862172165 | 0,890133914 | 0,897439147 | 0,068612 |
| Q3TDK6  | ROGDI | 1,073105848 | 0,914804168 | 0,967752206 | 1,044337778 | 0,915820164 | 1,004602921 | 0,863769618 | 0,884423933 | 0,797987955 | 0,893320918 | 0,069302 |
| Q99PT1  | GDIR1 | 1,020926616 | 0,974457424 | 0,983583007 | 1,021032953 | 1,054579239 | 1,109791868 | 1,138363502 | 1,062003715 | 0,981286778 | 1,069205021 | 0,069363 |
| Q00PI9  | HNRL2 | 1,013396992 | 1,008983103 | 0,933349492 | 1,044270412 | 1,178256047 | 1,084656649 | 1,046735155 | 0,998062364 | 1,162903624 | 1,094122768 | 0,069424 |
| Q62418  | DBNL  | 0,981658314 | 0,969243618 | 1,028622473 | 1,020475595 | 0,955083924 | 0,822256873 | 0,86180972  | 0,961375293 | 0,988351747 | 0,917775511 | 0,070047 |
| Q91WC3  | ACSL6 | 1,243934649 | 0,940428956 | 0,952962875 | 0,862673521 | 1,176134792 | 1,19614295  | 1,134568547 | 1,210726505 | 1,100638226 | 1,163642204 | 0,071339 |
| Q8BWWY3 | ERF1  | 0,871506859 | 0,872434016 | 1,162189424 | 1,093869701 | 1,115300229 | 1,053665791 | 1,279604194 | 1,157900596 | 1,261343242 | 1,17356281  | 0,072371 |
| Q8BK08  | TMM11 | 1,06414432  | 0,96512132  | 0,987218031 | 0,983516329 | 0,853616969 | 0,955075165 | 0,937599791 | 0,760917949 | 0,975336809 | 0,896509336 | 0,07249  |
| Q80ZJ1  | RAP2A | 0,962236674 | 0,954320325 | 1,079172912 | 1,004270089 | 1,07162944  | 0,59288594  | 0,870995878 | 0,754608128 | 0,586631978 | 0,775350273 | 0,072618 |
| P51174  | ACADL | 1,032838785 | 1,052442226 | 0,902020256 | 1,012698733 | 1,020594565 | 1,049753695 | 1,152326279 | 1,108421744 | 1,083748443 | 1,082968945 | 0,072744 |
| P56959  | FUS   | 0,901776859 | 1,015110105 | 1,079668086 | 1,003444951 | 0,896620554 | 0,79485808  | 0,894757631 | 0,864481798 | 1,010955691 | 0,892334751 | 0,073085 |
| Q02357  | ANK1  | 1,045427063 | 1,050526547 | 0,886244824 | 1,017801566 | 0,928989866 | 0,996222804 | 0,842750073 | 0,758292038 | 0,87844687  | 0,88094033  | 0,073823 |
| P48722  | HS74L | 0,909788656 | 1,090201538 | 0,978120184 | 1,021889622 | 1,139104152 | 1,09693195  | 0,998811302 | 1,094808827 | 1,125309124 | 1,090993071 | 0,074132 |
| Q9DCT2  | NDUS3 | 1,09207309  | 0,966968523 | 0,962683357 | 0,97827503  | 0,945172045 | 0,947079911 | 0,974383421 | 0,885606934 | 0,828481326 | 0,916144728 | 0,075897 |
| Q9DCT8  | CRIP2 | 1,047744858 | 0,975398009 | 0,94819325  | 1,028663883 | 1,129769545 | 1,217277356 | 0,996678352 | 1,061365907 | 1,345643548 | 1,150146942 | 0,075953 |
| Q99M71  | EPDR1 | 0,996298786 | 0,900238161 | 1,000519053 | 1,102944001 | 0,897725665 | 1,015797373 | 0,869149441 | 0,793980686 | 0,709783543 | 0,857287342 | 0,076087 |
| Q8K021  | SCAM1 | 0,990764109 | 1,103431134 | 0,900609482 | 1,005195275 | 0,986699079 | 0,879434298 | 0,920854228 | 0,89403578  | 0,806271618 | 0,897459001 | 0,076228 |
| P70296  | PEBP1 | 0,70226278  | 0,851323003 | 1,457587036 | 0,988827181 | 0,754354106 | 0,57405638  | 0,784724069 | 0,643819678 | 0,686759409 | 0,688742728 | 0,076293 |
| Q3UHB8  | CC177 | 0,982072991 | 1,030292503 | 1,034655559 | 0,952978946 | 1,023118195 | 0,895203142 | 0,829547071 | 0,771492873 | 0,938657888 | 0,891603834 | 0,076654 |
| Q9EPR4  | S23A2 | 0,90397393  | 1,048754468 | 0,88297771  | 1,164293891 | 0,883816021 | 0,838131089 | 0,804585871 | 0,660567292 | 0,967726504 | 0,830965355 | 0,07703  |
| Q60932  | VDAC1 | 1,016638017 | 0,974125694 | 0,994250644 | 1,014985645 | 0,925120344 | 1,038030043 | 0,919247687 | 0,832625181 | 0,830026386 | 0,909009928 | 0,078125 |
| Q61081  | CDC37 | 0,900630697 | 1,029514177 | 1,028302065 | 1,041553061 | 1,054226829 | 0,998192523 | 1,185739977 | 1,142842728 | 1,107699542 | 1,09774032  | 0,078144 |
| P60766  | CDC42 | 0,976001005 | 1,06742297  | 0,941554223 | 1,015021802 | 0,901398759 | 0,9696996   | 0,954166066 | 0,961174736 | 0,844522074 | 0,926192247 | 0,078236 |
| Q71LX4  | TLN2  | 0,917431624 | 1,054859119 | 0,981357903 | 1,046351355 | 1,437436459 | 1,506844003 | 1,174584353 | 1,025882055 | 1,047881219 | 1,238525618 | 0,078924 |
| Q8BG73  | SH3L2 | 0,884716078 | 0,913116551 | 1,132458126 | 1,069709245 | 0,922981582 | 0,85123002  | 0,945200431 | 0,861280886 | 0,783168379 | 0,87277226  | 0,078967 |
| Q9CPQ1  | COX6C | 0,919454142 | 0,993962133 | 1,091055405 | 0,99552832  | 0,89790693  | 0,870891685 | 0,980950167 | 0,960877889 | 0,811523444 | 0,904430023 | 0,07906  |
| Q9JJU8  | SH3L1 | 0,724615894 | 1,039024899 | 1,115204613 | 1,121154595 | 0,681300142 | 0,815896262 | 0,969243294 | 0,678532145 | 0,805168096 | 0,790027988 | 0,079078 |
| Q6ZWN5  | RS9   | 0,901739412 | 0,988941225 | 1,049005906 | 1,060313457 | 0,875119937 | 0,9049616   | 0,987840341 | 0,944307403 | 0,820958222 | 0,906637501 | 0,079167 |
| Q8BFR5  | EFTU  | 1,014519213 | 1,024381665 | 0,999221357 | 0,961877765 | 0,998738599 | 0,958609175 | 0,97295715  | 0,953724084 | 0,960339305 | 0,968873662 | 0,079171 |
| Q99M87  | DNJA3 | 0,954763588 | 1,010448643 | 0,998805548 | 1,03598222  | 0,983785819 | 0,844463084 | 0,871297989 | 0,9042893   | 1,003561786 | 0,921479596 | 0,079504 |
| Q99NB1  | ACS2L | 0,952409443 | 1,042712468 | 0,960839881 | 1,044038207 | 0,914875377 | 0,642860928 | 0,095037401 | 0,810772377 | 0,817693207 | 0,656247858 | 0,080119 |
| P48320  | DCE2  | 0,936166653 | 1,212964807 | 0,82991722  | 1,02095132  | 0,996390629 | 1,150665477 | 1,390606357 | 1,452872861 | 1,210344935 | 1,240176052 | 0,080364 |
| P61957  | SUMO2 | 0,885507323 | 0,892779777 | 1,161586351 | 1,060126549 | 0,797645023 | 0,93553806  | 0,938881881 | 0,833835757 | 0,75607333  | 0,85239481  | 0,08057  |
| P54071  | IDHP  | 0,931417725 | 1,087163225 | 0,964667767 | 1,016751283 | 0,879537043 | 0,724176536 | 0,997514695 | 0,817477037 | 0,948183135 | 0,873377689 | 0,081381 |
| Q9JIG7  | CCD22 | 0,777956126 | 1,115742681 | 1,222239187 | 0,884062006 | 0,043540071 | 0,450404332 | 0,830455749 | 0,712287131 | 0,923446778 | 0,592026812 | 0,081774 |
| P68040  | RACK1 | 0,95684045  | 0,995661865 | 1,011631448 | 1,035866237 | 0,973643862 | 0,966948564 | 0,941620311 | 0,810632238 | 0,732833372 | 0,885135669 | 0,081823 |

|         |       |             |             |             |             |             |             |             |             |             |             |          |
|---------|-------|-------------|-------------|-------------|-------------|-------------|-------------|-------------|-------------|-------------|-------------|----------|
| Q8K2B3  | SDHA  | 1,031222258 | 1,006734381 | 0,954325758 | 1,007717603 | 1,022838491 | 1,077111794 | 1,09763401  | 1,021333048 | 1,019711768 | 1,047725823 | 0,08224  |
| P48774  | GSTM5 | 0,937767532 | 0,934416928 | 1,01138859  | 1,11642695  | 1,087837947 | 1,031455537 | 1,370116751 | 1,274201342 | 1,077337182 | 1,168189752 | 0,082485 |
| P17183  | ENOG  | 0,828235771 | 0,860931688 | 1,188329877 | 1,122502664 | 0,788024696 | 0,666152258 | 0,80572597  | 0,932826057 | 0,855206826 | 0,809587161 | 0,08261  |
| Q9D2G2  | ODO2  | 1,073397154 | 0,975005825 | 0,96423134  | 0,987365681 | 0,932610521 | 0,946158958 | 0,96585724  | 0,979721005 | 0,882309071 | 0,941331359 | 0,08301  |
| P60521  | GBRL2 | 0,88302665  | 1,039746195 | 1,118580815 | 0,95864634  | 0,894507633 | 0,730864395 | 0,985042224 | 0,894192231 | 0,838149366 | 0,86855117  | 0,083029 |
| P51859  | HDGF  | 0,998705556 | 0,979484015 | 1,005205318 | 1,016605111 | 0,844990646 | 0,587529039 | 0,941761003 | 0,969010467 | 0,879712354 | 0,844600702 | 0,084341 |
| Q8BP67  | RL24  | 0,710930224 | 1,051808458 | 1,102416944 | 1,134844375 | 1,077662232 | 1,071695672 | 1,341038948 | 1,286853682 | 1,319775955 | 1,219405298 | 0,084971 |
| P23116  | EIF3A | 0,901648519 | 1,208893462 | 0,945819079 | 0,943638941 | 1,344853043 | 1,277830778 | 1,095446888 | 1,052056023 | 1,120173245 | 1,178071996 | 0,085551 |
| Q9CYR6  | AGM1  | 0,823724466 | 1,109168455 | 0,957712536 | 1,109394542 | 1,066711091 | 1,02755249  | 1,238162994 | 1,272714473 | 1,216009899 | 1,164230189 | 0,085576 |
| Q8QZR5  | ALAT1 | 1,031869415 | 0,949139757 | 1,028529392 | 0,990461436 | 0,954329097 | 0,564743957 | 0,916605661 | 0,917792191 | 0,82401508  | 0,835497197 | 0,085836 |
| Q91V12  | BACH  | 1,001176373 | 1,027798302 | 0,9639972   | 1,007028125 | 1,03564422  | 0,892105944 | 0,925744541 | 0,934625746 | 0,886698004 | 0,934963691 | 0,086071 |
| Q6Z WV3 | RL10  | 0,841433595 | 0,933308465 | 1,073013101 | 1,15224484  | 1,083426283 | 1,050093444 | 1,391452384 | 1,230454507 | 1,162648956 | 1,183615115 | 0,086278 |
| Q91ZA3  | PCCA  | 0,950302424 | 1,145563394 | 0,958895882 | 0,9452383   | 0,904506289 | 0,927521267 | 0,868487861 | 0,775751324 | 0,964478571 | 0,888149062 | 0,086549 |
| P25444  | RS2   | 0,978816786 | 0,977776898 | 0,99225921  | 1,051147105 | 0,922029284 | 0,984983064 | 0,980068626 | 0,817712619 | 0,749284252 | 0,890815569 | 0,086821 |
| Q9CPR4  | RL17  | 0,944341811 | 1,06780408  | 0,994970069 | 0,992884041 | 0,908313111 | 0,95566219  | 1,01493888  | 0,848640521 | 0,839266496 | 0,91336424  | 0,087322 |
| P17879  | HS71B | 0,747341615 | 1,160678316 | 1,105743196 | 0,986236873 | 0,81006107  | 0,747839548 | 0,893143659 | 0,815681193 | 0,880435143 | 0,829432122 | 0,087589 |
| P60487  | PLPP  | 0,956972274 | 0,9150228   | 1,080400072 | 1,047604854 | 0,965668089 | 0,902663663 | 0,904480621 | 0,934386319 | 0,93275414  | 0,927990566 | 0,087591 |
| Q8BG05  | ROA3  | 0,935592131 | 0,976132097 | 1,032318082 | 1,05595769  | 0,985154006 | 0,821195837 | 0,982004617 | 0,908240086 | 0,880598077 | 0,915438525 | 0,087999 |
| Q8BHF7  | PGPS1 | 1,025534566 | 1,051580796 | 0,878311745 | 1,044572894 | 1,019841962 | 1,034892635 | 1,213664191 | 1,406797594 | 1,185303673 | 1,172100011 | 0,08991  |
| Q91ZP9  | NECA2 | 0,98053966  | 1,0158579   | 0,966568582 | 1,037033857 | 0,977957597 | 0,634724376 | 0,873549306 | 0,861911393 | 0,958976094 | 0,861423753 | 0,090814 |
| P63323  | RS12  | 0,876435221 | 1,028287603 | 1,093519721 | 1,001757455 | 0,868600983 | 0,929372997 | 0,998475289 | 0,859681876 | 0,780740634 | 0,887374356 | 0,090953 |
| Q9ESM3  | HPLN2 | 1,247470724 | 1,172642837 | 0,788657357 | 0,791229081 | 0,86598692  | 0,860985853 | 0,776314989 | 0,685193073 | 0,653343716 | 0,76836491  | 0,091035 |
| Q61029  | LAP2B | 0,97113822  | 1,078878301 | 0,947904388 | 1,00207909  | 0,927076977 | 0,809012805 | 0,883629976 | 1,016135502 | 0,918328446 | 0,910836741 | 0,091216 |
| Q9CRB8  | MTFP1 | 0,97009904  | 1,17996972  | 0,839907798 | 1,010023442 | 0,907161716 | 0,91820837  | 0,825482758 | 0,885431554 | 0,652893185 | 0,837835517 | 0,091333 |
| Q60597  | ODO1  | 1,093523787 | 0,953692192 | 0,956890494 | 0,995893526 | 0,982713928 | 0,926295168 | 0,879956108 | 0,892030522 | 0,96356321  | 0,928911787 | 0,091861 |
| P60710  | ACTB  | 0,768519243 | 1,08121545  | 1,048201998 | 1,10206331  | 1,155064044 | 1,102925015 | 1,162751918 | 1,110741442 | 1,149192495 | 1,136134983 | 0,092324 |
| Q9DBG3  | AP2B1 | 1,035962721 | 0,949576732 | 0,995021629 | 1,019438919 | 1,128274595 | 0,954531299 | 1,061469397 | 1,185364726 | 1,232826233 | 1,11249325  | 0,092332 |
| Q922B2  | SYDC  | 0,956683343 | 1,035125797 | 0,997299971 | 1,010890888 | 0,968964568 | 0,921058924 | 0,978284998 | 0,992810754 | 0,931591481 | 0,958542145 | 0,092336 |
| Q9Z2H5  | E41L1 | 0,919899042 | 1,01771663  | 1,036277401 | 1,026106927 | 1,024858136 | 1,06153605  | 1,081624548 | 1,045437996 | 1,204444874 | 1,083580321 | 0,092868 |
| P56391  | CX6B1 | 0,825345531 | 0,946129914 | 1,234339239 | 0,994185316 | 0,623012061 | 0,94067673  | 0,797965119 | 0,76340444  | 0,911134837 | 0,807238637 | 0,092949 |
| Q9JHK4  | PGTA  | 1,025570335 | 1,049778384 | 1,006147888 | 0,918503394 | 0,902741264 | 0,828397172 | 0,209635216 | 0,89683666  | 0,716109915 | 0,710744045 | 0,093716 |
| Q9QZ88  | VPS29 | 0,870216616 | 1,002104397 | 1,10080501  | 1,026873977 | 0,867448273 | 0,783119948 | 1,017964562 | 0,895588245 | 0,845822814 | 0,881988768 | 0,093859 |
| P21279  | GNAQ  | 0,927010862 | 1,04545772  | 1,026150135 | 1,001381283 | 0,967212384 | 0,942220012 | 0,941112832 | 0,961154609 | 0,959951871 | 0,954330342 | 0,093914 |
| Q9CYH2  | F213A | 1,005481185 | 1,035910331 | 0,974177602 | 0,984430882 | 0,859877197 | 1,045072777 | 0,925407749 | 0,915476425 | 0,886037136 | 0,926374257 | 0,094024 |
| Q8CGF6  | WDR47 | 0,996817594 | 1,029352283 | 1,042628621 | 0,931201501 | 0,943880003 | 0,915086213 | 1,009316652 | 0,899625553 | 0,936603041 | 0,940902292 | 0,094137 |
| Q9WUK2  | IF4H  | 1,12103684  | 1,198109266 | 0,858832812 | 0,822021083 | 1,08332502  | 1,32053817  | 1,135413831 | 1,191517869 | 1,67501438  | 1,281161854 | 0,095111 |
| Q8BGY7  | F210A | 1,001235263 | 1,125356084 | 0,933150779 | 0,940257873 | 0,873429648 | 0,821831744 | 0,843421406 | 0,828304475 | 0,22108288  | 0,717614031 | 0,095127 |
| Q9ER58  | TICN2 | 1,045126403 | 1,024669106 | 0,871080448 | 1,059124043 | 0,946442109 | 0,653103985 | 0,946214555 | 0,866489542 | 0,891520898 | 0,860754218 | 0,095809 |
| Q9JKB1  | UCHL3 | 1,020693545 | 0,945252339 | 0,992059485 | 1,041994631 | 1,120717895 | 0,971249823 | 1,089215108 | 1,119447728 | 1,050301052 | 1,070186321 | 0,096273 |
| Q68FD5  | CLH1  | 0,965662534 | 1,009186619 | 1,029734928 | 0,995415919 | 1,155972253 | 1,016931678 | 0,991729576 | 1,066887266 | 1,133387124 | 1,072981579 | 0,09639  |

|        |       |             |             |             |             |             |             |             |             |             |             |          |
|--------|-------|-------------|-------------|-------------|-------------|-------------|-------------|-------------|-------------|-------------|-------------|----------|
| A2RT62 | FXL16 | 1,010099428 | 0,908300349 | 1,102272615 | 0,979327609 | 0,799748064 | 0,758465604 | 0,876319967 | 0,924033233 | 1,026956102 | 0,877104594 | 0,097149 |
| Q64332 | SYN2  | 0,883416983 | 0,999172143 | 1,087453946 | 1,029956928 | 0,891843311 | 0,799744401 | 0,939290164 | 0,814886624 | 1,004814592 | 0,890115819 | 0,097905 |
| P51863 | VAOD1 | 0,911478445 | 1,01343516  | 1,027129772 | 1,047956623 | 1,013963818 | 0,896155115 | 0,909358732 | 0,939853518 | 0,881570105 | 0,928180258 | 0,098418 |
| Q69ZS6 | SV2C  | 1,012055269 | 1,208079391 | 0,828558873 | 0,951306468 | 1,195153454 | 1,216313143 | 1,175013598 | 1,133228386 | 1,030962313 | 1,150134179 | 0,098624 |
| P61222 | ABCE1 | 0,829106242 | 1,06394948  | 1,068649424 | 1,038294853 | 0,837602368 | 0,893551788 | 0,862783752 | 0,977631251 | 0,885246016 | 0,891363035 | 0,098688 |
| P31324 | KAP3  | 1,041295259 | 0,914665255 | 1,109993042 | 0,934046445 | 1,258703133 | 1,022056408 | 1,055518893 | 1,112696421 | 1,39607564  | 1,169010099 | 0,098757 |
| Q8VED9 | LEGL  | 0,6314374   | 0,874463792 | 1,413008932 | 1,081089876 | 0,804332317 | 0,590093819 | 0,826846471 | 0,490875832 | 0,741816595 | 0,690793007 | 0,099502 |
| P29341 | PABP1 | 0,896442446 | 1,081376807 | 1,016514865 | 1,005665882 | 1,061773958 | 1,101793969 | 1,050114927 | 1,062824172 | 1,057498199 | 1,066801045 | 0,09959  |
| Q9WUR9 | KAD4  | 0,943980861 | 0,879898826 | 1,060385    | 1,115735314 | 0,849425253 | 0,972583217 | 0,934945736 | 0,772902263 | 0,889665693 | 0,883904432 | 0,10049  |
| Q8BK64 | AHSA1 | 0,972026166 | 1,112921699 | 0,924181353 | 0,990870782 | 0,934066956 | 0,952463557 | 0,938582285 | 0,872537886 | 0,938844995 | 0,927299136 | 0,102421 |
| Q61543 | GSLG1 | 1,032741492 | 0,792367864 | 1,195113572 | 0,979777072 | 0,830536834 | 0,57889225  | 0,771827134 | 0,759885409 | 1,028910634 | 0,794010452 | 0,102435 |
| Q9DCX2 | ATP5H | 1,038349262 | 0,971474289 | 0,975530164 | 1,014646285 | 0,934348249 | 0,994531637 | 0,992101768 | 0,915380062 | 0,95039783  | 0,957351909 | 0,102546 |
| Q501J6 | DDX17 | 0,952595459 | 0,996039252 | 1,055390766 | 0,995974523 | 0,866952864 | 0,832454568 | 0,987834685 | 0,829319044 | 1,020593894 | 0,907431011 | 0,103158 |
| Q61768 | KINH  | 1,100489678 | 1,030761843 | 1,039652194 | 0,829096285 | 1,026202418 | 1,137807944 | 1,052983783 | 1,188525275 | 1,245346992 | 1,130173282 | 0,10357  |
| Q924M7 | MPI   | 0,890390979 | 1,090786979 | 1,016470652 | 1,00235139  | 0,989349264 | 0,882123289 | 0,895526597 | 0,954365915 | 0,852356836 | 0,91474438  | 0,106585 |
| P70663 | SPRL1 | 1,062270566 | 1,01676613  | 0,95434488  | 0,966618424 | 0,997651077 | 0,925257364 | 0,96799413  | 0,930984978 | 0,852936976 | 0,934964905 | 0,106713 |
| P70441 | NHRF1 | 0,966727173 | 0,988877556 | 1,057141717 | 0,987253554 | 1,004299955 | 0,854252755 | 0,954257937 | 0,87875543  | 0,971017142 | 0,932516644 | 0,107351 |
| O88844 | IDHC  | 0,917969877 | 0,935251641 | 1,052325514 | 1,094452968 | 0,869388413 | 0,749530285 | 0,979925324 | 0,90926837  | 0,946608069 | 0,890944092 | 0,107677 |
| Q6ZPJ3 | UBE2O | 0,918977236 | 1,031492312 | 1,008502333 | 1,041028119 | 1,122463004 | 0,935306713 | 1,100580515 | 1,24662183  | 1,187396976 | 1,118473808 | 0,108074 |
| P09528 | FRIH  | 1,012214776 | 1,081380233 | 0,943949604 | 0,962455387 | 0,844255719 | 0,896115015 | 1,068380354 | 0,846782255 | 0,791569033 | 0,889420475 | 0,110022 |
| O35098 | DPYL4 | 0,855258222 | 1,117277927 | 1,017648318 | 1,009815533 | 1,119100507 | 1,009246438 | 1,165809722 | 1,182904594 | 1,068408116 | 1,109093875 | 0,110531 |
| O35345 | IMA7  | 1,143792522 | 0,868155744 | 0,94554908  | 1,042502654 | 1,01996647  | 1,339907256 | 1,126907538 | 1,19263955  | 1,066446389 | 1,14917344  | 0,112466 |
| Q99LX0 | PARK7 | 0,948501219 | 0,995740883 | 0,94066647  | 1,115091428 | 1,04710448  | 1,044510107 | 1,223747247 | 1,157622378 | 1,032984314 | 1,101193705 | 0,112626 |
| O08709 | PRDX6 | 0,884386341 | 0,996252536 | 1,004378366 | 1,114982757 | 1,076555358 | 1,147088246 | 1,131620228 | 1,055572792 | 1,028907055 | 1,087948736 | 0,11306  |
| P07901 | HS90A | 0,964934628 | 1,091109679 | 0,949875697 | 0,994079997 | 1,057261267 | 1,065714505 | 1,058689904 | 1,009696594 | 1,102268979 | 1,05872625  | 0,113705 |
| Q8BWR2 | PITH1 | 0,902290338 | 1,019580031 | 0,88822749  | 1,189902141 | 0,799308181 | 0,894687638 | 1,020213373 | 0,801030266 | 0,733536294 | 0,84975515  | 0,114339 |
| Q6ZVW7 | RL35  | 0,687457545 | 1,068315144 | 1,121395467 | 1,122831845 | 1,055428903 | 1,243218617 | 1,411603327 | 1,126012416 | 1,19849483  | 1,206951619 | 0,114389 |
| Q80X50 | UBP2L | 0,983623177 | 1,052750496 | 0,938767985 | 1,024858342 | 1,094190571 | 0,781503021 | 0,843791539 | 0,814304917 | 0,86671198  | 0,880100406 | 0,114403 |
| P49025 | CTRO  | 0,910128638 | 1,041516762 | 0,968384671 | 1,079969928 | 1,21070683  | 1,080099504 | 0,982368188 | 1,103562901 | 1,098973615 | 1,095142208 | 0,115304 |
| Q61885 | MOG   | 1,065986194 | 0,972815133 | 0,923421615 | 1,037777058 | 0,978057154 | 1,36320277  | 1,34458733  | 1,199457511 | 0,993463258 | 1,175753605 | 0,115496 |
| Q9QYJ0 | DNJA2 | 0,990054257 | 1,026934157 | 0,993341122 | 0,989670464 | 0,909288634 | 0,927382515 | 0,976740548 | 0,928898193 | 1,027542943 | 0,953970567 | 0,115876 |
| P11404 | FABPH | 0,613360004 | 0,766962231 | 1,596967222 | 1,022710543 | 0,69078065  | 0,495643298 | 0,73032017  | 0,644066073 | 0,690062103 | 0,650174459 | 0,116612 |
| Q91ZJ5 | UGPA  | 0,933557068 | 1,0305525   | 1,04609907  | 0,989791362 | 0,984594966 | 0,870440836 | 0,974406558 | 0,968076906 | 0,89450855  | 0,938405563 | 0,116699 |
| P40124 | CAP1  | 0,944251468 | 1,027240582 | 1,054886734 | 0,973621216 | 1,05192757  | 0,984687512 | 1,04954386  | 1,169831923 | 1,213104295 | 1,093819032 | 0,118209 |
| Q9CQQ7 | AT5F1 | 0,994255287 | 1,017780218 | 0,943133423 | 1,044831072 | 0,88111083  | 0,96561207  | 1,004350064 | 0,96527706  | 0,884483356 | 0,940166676 | 0,118313 |
| Q9D0F9 | PGM1  | 0,787581927 | 0,933634049 | 1,136223289 | 1,142560736 | 0,757774536 | 0,763898731 | 0,945330031 | 0,893752786 | 0,871816465 | 0,84651451  | 0,118406 |
| Q9CQC7 | NDUB4 | 1,034919153 | 1,050135321 | 1,023865154 | 0,891080373 | 0,784549745 | 0,997581105 | 0,990607313 | 0,835143952 | 0,88012926  | 0,897602275 | 0,119252 |
| P28663 | SNAB  | 0,891645957 | 0,934817116 | 1,09300836  | 1,080528567 | 0,838090392 | 0,859860415 | 0,99000172  | 0,944287551 | 0,882196749 | 0,902887365 | 0,120299 |
| Q8C8R3 | ANK2  | 0,90970898  | 1,037307437 | 1,028337713 | 1,024645871 | 1,066229247 | 1,042053902 | 1,035195906 | 1,030636053 | 1,155800237 | 1,065983069 | 0,121287 |
| Q3UM45 | PP1R7 | 0,99679176  | 0,976305793 | 1,037612742 | 0,989289705 | 1,04433559  | 0,9381038   | 1,134722933 | 1,175281189 | 1,169968685 | 1,092482439 | 0,1216   |

|        |       |             |             |             |             |             |             |             |             |             |             |          |
|--------|-------|-------------|-------------|-------------|-------------|-------------|-------------|-------------|-------------|-------------|-------------|----------|
| P68037 | UB2L3 | 0,946978158 | 1,084723045 | 0,96047337  | 1,007825428 | 0,970579689 | 0,899400733 | 0,95547129  | 0,978662455 | 0,83703428  | 0,928229689 | 0,121636 |
| Q64133 | AOFA  | 1,040056925 | 1,042339345 | 0,988020932 | 0,929582799 | 0,840059349 | 0,93699432  | 1,013431972 | 0,963482907 | 0,874408136 | 0,925675337 | 0,121662 |
| Q99KK7 | DPP3  | 1,065294008 | 0,956680732 | 1,054798339 | 0,92322692  | 0,947157278 | 0,917673494 | 0,507161011 | 0,900981025 | 0,87345414  | 0,82928539  | 0,123132 |
| P62301 | RS13  | 0,856639906 | 1,038467311 | 1,036925944 | 1,067966839 | 0,874552801 | 1,006138394 | 0,876261832 | 0,884903831 | 0,912297729 | 0,910830917 | 0,123191 |
| Q03265 | ATPA  | 1,056505057 | 1,014040265 | 0,966177978 | 0,9632767   | 0,950219423 | 0,967439625 | 0,99007272  | 0,95366838  | 0,952945449 | 0,96286912  | 0,123224 |
| Q61699 | HS105 | 0,913812158 | 1,06497647  | 1,042173164 | 0,979038208 | 1,063696256 | 1,147139812 | 1,04740684  | 0,993737781 | 1,21328873  | 1,093053884 | 0,123869 |
| Q99JI4 | PSMD6 | 0,865669804 | 1,044978417 | 1,086190866 | 1,003160913 | 0,965076203 | 0,906183458 | 0,903348852 | 0,858531207 | 0,95357802  | 0,917343548 | 0,124386 |
| Q9CWJ9 | PUR9  | 0,96355898  | 0,92386625  | 1,034014773 | 1,078559997 | 0,634189451 | 0,845808475 | 0,915530763 | 1,001068559 | 0,929584132 | 0,865236276 | 0,125447 |
| Q9CR26 | VTA1  | 1,032391905 | 1,033243333 | 0,976877513 | 0,957487249 | 1,193315367 | 0,953423733 | 1,110925907 | 1,067312443 | 1,084190357 | 1,081833561 | 0,125728 |
| O70589 | CSKP  | 1,010031272 | 0,938475796 | 1,019884777 | 1,031608155 | 1,152971603 | 1,082002484 | 1,022266972 | 1,002078105 | 1,04694047  | 1,061251927 | 0,126012 |
| P00920 | CAH2  | 1,117900553 | 0,930386725 | 0,899080104 | 1,052632618 | 0,952856566 | 0,766689888 | 0,994387708 | 0,910404963 | 0,723064735 | 0,869480772 | 0,126149 |
| Q3TC72 | FAHD2 | 0,941545905 | 0,981188642 | 1,099254852 | 0,978010602 | 0,984236917 | 0,966138847 | 0,879143848 | 0,944199814 | 0,901943936 | 0,935132672 | 0,126715 |
| Q9CXY6 | ILF2  | 0,881971021 | 1,051711059 | 1,054121241 | 1,01219668  | 0,995639213 | 0,860338087 | 0,912582835 | 0,917983935 | 0,938870682 | 0,92508295  | 0,127681 |
| P40237 | CD82  | 1,124608715 | 1,024632841 | 0,886712572 | 0,964045872 | 1,017624877 | 1,17202403  | 1,139312332 | 1,146824718 | 1,022273918 | 1,099611975 | 0,128617 |
| Q9CY58 | PAIRB | 1,012632742 | 1,058282234 | 0,790801014 | 1,13828401  | 1,429568346 | 1,154031711 | 1,120602851 | 1,077185177 | 1,0729091   | 1,170859437 | 0,130224 |
| Q80TL4 | PHF24 | 0,993299552 | 0,910749176 | 1,16452135  | 0,931429922 | 0,875252955 | 0,763056241 | 0,927560683 | 0,890800182 | 0,983981267 | 0,888130266 | 0,130427 |
| P62984 | RL40  | 0,921523077 | 1,109046231 | 1,019759764 | 0,949670928 | 1,005490253 | 0,907633781 | 0,824267172 | 0,88752332  | 0,945807003 | 0,914144306 | 0,130742 |
| Q9D358 | PPAC  | 0,860888019 | 1,067248631 | 1,134627687 | 0,937235664 | 0,033215792 | 0,765317311 | 0,937395157 | 0,843075744 | 0,779929558 | 0,671786712 | 0,131287 |
| Q641P0 | ARP3B | 0,836805343 | 1,061219993 | 1,129946885 | 0,972027779 | 1,134408782 | 0,930067466 | 1,234909948 | 1,174794666 | 1,391004395 | 1,173037051 | 0,131657 |
| Q61301 | CTNA2 | 1,197772852 | 0,881287033 | 0,897291819 | 1,023648296 | 1,254617189 | 1,363523017 | 1,20675467  | 1,026942768 | 1,005730879 | 1,171513704 | 0,132283 |
| Q9JLB0 | MPP6  | 1,068028696 | 1,028311586 | 0,891395786 | 1,012263932 | 1,119556096 | 1,087653066 | 1,045315855 | 1,094987706 | 1,001044592 | 1,069711463 | 0,132758 |
| Q8VE62 | PAIP1 | 0,89088213  | 0,996134036 | 1,060793392 | 1,052190442 | 0,825301522 | 0,838666976 | 0,881028104 | 0,778996057 | 1,085264494 | 0,88185143  | 0,133422 |
| Q6PER3 | MARE3 | 1,013084487 | 0,991583286 | 0,932790154 | 1,062542073 | 0,995683668 | 1,01868979  | 0,881568424 | 0,852251636 | 0,846254445 | 0,918889592 | 0,133977 |
| Q8VIJ6 | SFPQ  | 0,869262817 | 1,043460122 | 1,129320457 | 0,957956604 | 1,121388694 | 1,005153184 | 1,100269252 | 1,092319182 | 1,169349324 | 1,097695927 | 0,134187 |
| P28867 | KPCD  | 1,45638426  | 1,046474976 | 0,783581448 | 0,713559316 | 1,677238626 | 1,241782521 | 1,154162259 | 1,20428112  | 1,264697226 | 1,308432351 | 0,134309 |
| Q9D898 | ARP5L | 0,939530792 | 0,949134173 | 1,093180037 | 1,018154999 | 1,010902692 | 0,902492458 | 0,935053399 | 0,899484208 | 0,923603732 | 0,934307298 | 0,134583 |
| P46638 | RB11B | 0,965458641 | 0,991156196 | 0,99447144  | 1,048913722 | 0,901152064 | 0,961857878 | 1,034345404 | 0,914961969 | 0,806674377 | 0,923798338 | 0,13512  |
| P70349 | HINT1 | 0,502983001 | 0,77057383  | 1,893010099 | 0,83343307  | 0,494317832 | 0,47676328  | 0,653254333 | 0,523127513 | 0,56915527  | 0,543323646 | 0,136184 |
| P24472 | GSTA4 | 0,893641569 | 0,972179376 | 1,039376587 | 1,094802468 | 0,77928426  | 1,023506909 | 0,999800892 | 0,812890226 | 0,722183025 | 0,867533062 | 0,136217 |
| P62242 | RS8   | 0,874157622 | 1,007984653 | 1,050039164 | 1,067818562 | 0,87573509  | 0,944018632 | 1,014899892 | 0,857718036 | 0,882951645 | 0,915064659 | 0,136493 |
| Q9D819 | IPYR  | 0,953955771 | 0,947997854 | 1,014756647 | 1,083289727 | 1,00576043  | 0,920524348 | 0,973723173 | 0,899488455 | 0,836480639 | 0,927195409 | 0,137671 |
| P57780 | ACTN4 | 0,963299439 | 0,987592994 | 1,150626049 | 0,898481518 | 0,938955647 | 0,876022019 | 0,948917503 | 0,821260729 | 0,95180859  | 0,907392898 | 0,137991 |
| P45591 | COF2  | 0,973339805 | 0,961096069 | 0,997975482 | 1,067588643 | 0,943369287 | 0,75726813  | 0,90590738  | 1,055540295 | 0,819082091 | 0,896233437 | 0,137997 |
| P55066 | NCAN  | 0,818800234 | 0,792193311 | 1,167196803 | 1,221809653 | 0,782967045 | 0,705341998 | 0,69935229  | 0,54700056  | 1,084834593 | 0,763899297 | 0,138985 |
| P63044 | VAMP2 | 0,918426271 | 1,06400711  | 1,030051949 | 0,98751467  | 1,109639217 | 1,004418201 | 1,041124728 | 1,269396425 | 1,067993506 | 1,098514415 | 0,139102 |
| Q99MR8 | MCCA  | 0,945142865 | 1,138673011 | 0,977305729 | 0,938878396 | 0,921032007 | 0,979390597 | 0,943598226 | 0,856193653 | 0,905328329 | 0,921108563 | 0,139531 |
| P62748 | HPCL1 | 0,740004319 | 1,039993621 | 1,090466069 | 1,129535991 | 0,804663903 | 0,892147704 | 0,862434339 | 0,852677649 | 0,916431762 | 0,865671071 | 0,140006 |
| P50247 | SAHH  | 0,973877598 | 0,999223735 | 1,003344262 | 1,023554405 | 0,982140244 | 0,86502542  | 0,999186094 | 0,961803952 | 0,960683932 | 0,953767928 | 0,141416 |
| P17182 | ENOA  | 0,942458204 | 0,939923409 | 1,051503573 | 1,066114813 | 0,907397449 | 0,879303278 | 0,908421954 | 0,98624786  | 0,991792484 | 0,934632605 | 0,14259  |
| P62774 | MTPN  | 0,77478552  | 0,993223102 | 1,223956228 | 1,008035149 | 0,753824981 | 0,835845451 | 0,839513586 | 0,85932933  | 0,971020284 | 0,851906726 | 0,142864 |

|        |       |             |             |             |             |             |             |             |             |             |             |          |
|--------|-------|-------------|-------------|-------------|-------------|-------------|-------------|-------------|-------------|-------------|-------------|----------|
| Q9DBJ1 | PGAM1 | 0,923365377 | 0,815057183 | 1,092420487 | 1,169156953 | 0,809539956 | 0,881592489 | 0,906154679 | 0,932303174 | 0,85787658  | 0,877493376 | 0,143579 |
| Q9D6J6 | NDUV2 | 1,080535015 | 1,04749721  | 0,896672293 | 0,975295482 | 0,876343324 | 0,959308533 | 0,974798416 | 0,941009468 | 0,910516752 | 0,932395299 | 0,143791 |
| O70251 | EF1B  | 0,924649959 | 0,998280527 | 1,034425678 | 1,042643835 | 0,986692988 | 0,927969514 | 1,014356822 | 0,848605571 | 0,818634565 | 0,919251892 | 0,143906 |
| P08752 | GNAI2 | 1,008012635 | 1,031977018 | 1,009215385 | 0,950794963 | 0,951051132 | 1,008433724 | 0,986149474 | 0,935595233 | 0,93095188  | 0,962436289 | 0,143986 |
| Q9JKC6 | CEND  | 1,121924762 | 1,171354129 | 0,732510997 | 0,974210112 | 1,121034245 | 1,37446381  | 1,203755346 | 1,187463181 | 1,0118217   | 1,179707656 | 0,144883 |
| P17665 | COX7C | 0,994420391 | 1,049744373 | 1,044204087 | 0,91163115  | 0,904905669 | 0,974441067 | 0,9717225   | 0,972138389 | 0,883592862 | 0,941360097 | 0,145103 |
| Q9JM76 | ARPC3 | 0,571261889 | 1,078244285 | 1,064896123 | 1,285597703 | 1,073781434 | 1,135337052 | 1,246365925 | 1,486995838 | 1,346910615 | 1,257878173 | 0,145264 |
| P49722 | PSA2  | 0,743732128 | 1,082265838 | 1,134401311 | 1,039600724 | 1,094471707 | 1,142342933 | 1,26729881  | 1,259495876 | 1,012611255 | 1,155244116 | 0,145398 |
| Q9CQ60 | 6PGL  | 0,83252767  | 1,004166292 | 1,072278272 | 1,091027766 | 0,848355123 | 0,824707108 | 1,003904268 | 0,79061326  | 0,962084962 | 0,885932944 | 0,145664 |
| Q6GQT9 | NOMO1 | 0,960976818 | 1,017667818 | 0,964390223 | 1,05696514  | 0,918463441 | 0,780557496 | 0,848387992 | 0,114390081 | 0,917655113 | 0,715890824 | 0,146774 |
| Q9ERD7 | TBB3  | 1,029173599 | 1,017035404 | 0,968418714 | 0,985372283 | 1,044343289 | 0,937186282 | 1,094195409 | 1,190517581 | 1,249673532 | 1,103183218 | 0,147687 |
| O88531 | PPT1  | 1,01867362  | 0,935843455 | 1,096662537 | 0,948820389 | 1,076085062 | 1,097856895 | 1,060090061 | 0,990610615 | 1,093800049 | 1,063688537 | 0,149021 |
| O89112 | LANC1 | 1,036310768 | 1,020526746 | 1,002341365 | 0,940821121 | 0,958845788 | 0,871209954 | 1,016802441 | 0,76335156  | 0,957687054 | 0,91357936  | 0,149234 |
| Q91Z31 | PTBP2 | 1,050020793 | 0,939073035 | 0,763873877 | 1,247032294 | 0,982382949 | 0,727959457 | 0,703329697 | 0,912373475 | 0,802599779 | 0,825729071 | 0,149365 |
| Q8R127 | SCPDL | 1,093722446 | 1,36325242  | 0,689263068 | 0,853762066 | 1,273739127 | 1,29080443  | 1,183277584 | 1,303496548 | 1,068839796 | 1,224031497 | 0,149368 |
| Q9DOM3 | CY1   | 1,025410631 | 1,01943848  | 0,980776387 | 0,974374502 | 0,977790247 | 0,98002555  | 1,006511513 | 0,943446961 | 0,956228435 | 0,972800541 | 0,149841 |
| Q61548 | AP180 | 0,91961476  | 0,984288021 | 1,050469456 | 1,045627763 | 1,114543773 | 0,981031172 | 1,117723015 | 1,013304547 | 1,129383832 | 1,071197268 | 0,15044  |
| P12367 | KAP2  | 0,954964134 | 1,046183412 | 1,059649017 | 0,939203436 | 1,098937729 | 0,97134795  | 1,14896657  | 1,092509795 | 1,040202222 | 1,070392853 | 0,150711 |
| P35438 | NMDZ1 | 0,947088013 | 0,952581376 | 1,11091786  | 0,989412751 | 1,078808875 | 0,802321693 | 0,730824764 | 0,807510623 | 0,949965818 | 0,873886355 | 0,15105  |
| Q9R1V7 | ADA23 | 1,014101601 | 1,080382774 | 0,964104948 | 0,941410677 | 1,103163114 | 1,046988549 | 1,032884749 | 1,062701297 | 1,012632574 | 1,051674057 | 0,151752 |
| Q9D1D4 | TMEDA | 0,961973346 | 1,032387951 | 0,981826384 | 1,02381232  | 0,864721205 | 0,99812087  | 1,024049456 | 0,790026097 | 0,91405869  | 0,918195264 | 0,152001 |
| P17156 | HSP72 | 0,770234577 | 1,047983324 | 1,146853869 | 1,03492823  | 0,841169455 | 0,872875405 | 0,892353185 | 0,837648763 | 0,95743117  | 0,880295596 | 0,154264 |
| Q64674 | SPEE  | 1,153590047 | 1,00965357  | 0,848775237 | 0,987981147 | 1,230308694 | 1,03748116  | 1,060276254 | 1,335939249 | 1,038188788 | 1,140438829 | 0,154561 |
| O35381 | AN32A | 1,010292208 | 0,920533207 | 1,087540814 | 0,981633771 | 1,061470351 | 1,097764393 | 1,075919071 | 1,102511824 | 0,978015941 | 1,063136316 | 0,156263 |
| Q9DAS9 | GBG12 | 1,167158221 | 1,284246741 | 1,260074131 | 0,288520907 | 1,296134931 | 1,01427079  | 1,535338598 | 1,702730163 | 1,412962641 | 1,392287424 | 0,156818 |
| O08553 | DPYL2 | 0,969085875 | 1,066309626 | 0,972477759 | 0,99212674  | 1,00505214  | 1,026565298 | 1,016803632 | 1,088164122 | 1,093563596 | 1,046029757 | 0,156985 |
| Q99JY0 | ECHB  | 1,013040363 | 1,00951009  | 0,962499787 | 1,01494976  | 0,855785837 | 1,03190178  | 1,011748075 | 0,88652893  | 0,85923331  | 0,929039586 | 0,158011 |
| P62754 | RS6   | 0,913049115 | 0,90980372  | 1,063720385 | 1,11342678  | 0,890621081 | 1,022601204 | 0,948658665 | 0,825818119 | 0,801077381 | 0,89775529  | 0,158755 |
| Q91WS0 | CISD1 | 0,903865536 | 1,018236706 | 1,056053435 | 1,021844322 | 0,876282253 | 1,124557812 | 1,330739478 | 1,216621153 | 1,159560509 | 1,141552241 | 0,159191 |
| Q9ESN6 | TRIM2 | 0,90667111  | 1,089534394 | 0,988491735 | 1,015302762 | 1,139097043 | 1,042466871 | 1,000240735 | 1,08868302  | 1,062672709 | 1,066632076 | 0,159237 |
| Q9CPW0 | CNTP2 | 0,981068319 | 1,11819655  | 0,972571553 | 0,928163578 | 0,939336858 | 0,945165987 | 0,918027063 | 0,917195492 | 0,97910339  | 0,939765758 | 0,159645 |
| Q99LB6 | MAT2B | 1,070247082 | 0,970815733 | 1,009337838 | 0,949599346 | 1,04798407  | 0,90953299  | 0,940572032 | 0,90840071  | 0,842227269 | 0,929743414 | 0,159737 |
| Q02248 | CTNB1 | 0,977486594 | 1,030535131 | 0,996038814 | 0,995939461 | 1,090316295 | 1,074946189 | 0,982680617 | 1,005851971 | 1,041785918 | 1,039116198 | 0,160766 |
| Q9D6M3 | GHC1  | 0,995143158 | 0,860379649 | 1,089766857 | 1,054710336 | 0,937472738 | 0,914217145 | 0,999723809 | 0,853117686 | 0,883944356 | 0,917695147 | 0,161504 |
| Q9WUM5 | SUCA  | 1,016910538 | 0,978127642 | 0,971682441 | 1,033279379 | 1,034874783 | 1,058112517 | 1,048695549 | 0,985552263 | 1,024216396 | 1,030290301 | 0,162145 |
| P28650 | PURA1 | 0,945499842 | 1,182015228 | 0,96172857  | 0,91075636  | 1,108501144 | 1,327261081 | 1,112709929 | 1,054338628 | 1,027686102 | 1,126099377 | 0,16215  |
| Q9WTP7 | KAD3  | 1,024376938 | 0,949217295 | 1,021702299 | 1,004703468 | 0,973978014 | 1,050771178 | 0,910654099 | 0,704834383 | 0,585938079 | 0,845235151 | 0,163451 |
| O70591 | PF2   | 0,919287114 | 0,977786894 | 1,090229618 | 1,012696374 | 0,963170442 | 1,084158829 | 1,128716816 | 1,163564628 | 1,050139386 | 1,07795002  | 0,164433 |
| Q8JZU2 | TXTP  | 1,017272059 | 0,941829307 | 0,993939297 | 1,046959338 | 0,851334229 | 0,964762565 | 1,016711489 | 0,979554403 | 0,841779192 | 0,930828376 | 0,165637 |
| Q8BH04 | PCKGM | 0,882408358 | 1,070510568 | 0,993074005 | 1,054007069 | 0,928697442 | 0,948781286 | 0,956972755 | 0,951972312 | 0,916622712 | 0,940609302 | 0,165934 |

|        |       |             |             |             |             |             |             |             |             |             |             |          |
|--------|-------|-------------|-------------|-------------|-------------|-------------|-------------|-------------|-------------|-------------|-------------|----------|
| O54734 | OST48 | 0,998063739 | 0,987181074 | 0,994944379 | 1,019810808 | 1,020887528 | 0,796456332 | 1,013712591 | 0,905062434 | 0,895080751 | 0,926239927 | 0,166285 |
| P26645 | MARCS | 0,833767695 | 0,988203904 | 1,17384467  | 1,004183731 | 0,814689061 | 0,872099301 | 0,96267532  | 0,840636758 | 0,9656661   | 0,891153308 | 0,166818 |
| P16388 | KCNA1 | 1,527126009 | 0,244937294 | 1,143786351 | 1,084150346 | 1,480597996 | 1,497135462 | 1,351983896 | 1,375423842 | 1,187856204 | 1,37859948  | 0,166892 |
| Q9Z2H2 | RGS6  | 1,034605962 | 1,025218491 | 1,036368041 | 0,903807505 | 1,327374989 | 1,16059849  | 1,065358586 | 1,121646387 | 0,930130825 | 1,121021855 | 0,167512 |
| P27773 | PDIA3 | 0,985379535 | 1,076284223 | 0,942105672 | 0,99623057  | 0,948130556 | 0,940829627 | 0,999543323 | 0,936216548 | 0,961498401 | 0,957243691 | 0,167614 |
| G5E829 | AT2B1 | 1,085249232 | 0,889278976 | 1,053333275 | 0,972138517 | 1,439111626 | 1,005033936 | 0,95213805  | 1,14298073  | 1,31702826  | 1,17125852  | 0,167658 |
| Q7TMK9 | HNRPQ | 1,013027564 | 1,032708244 | 0,867195403 | 1,08706879  | 1,124455905 | 1,002006721 | 1,117498502 | 1,019164246 | 1,145818855 | 1,081788846 | 0,167724 |
| P97494 | GSH1  | 0,954342549 | 0,988020214 | 1,049711898 | 1,00792534  | 0,911443496 | 0,853853345 | 0,955868153 | 0,920080975 | 1,048427864 | 0,937934767 | 0,168306 |
| P29758 | OAT   | 0,957472538 | 0,977610224 | 1,040940632 | 1,023976606 | 0,953661172 | 0,900739611 | 0,987311229 | 1,014526539 | 0,918404151 | 0,954928541 | 0,168965 |
| P85094 | ISC2A | 1,037568321 | 0,983931455 | 1,110290938 | 0,868209286 | 0,872765667 | 1,06138478  | 0,901106031 | 0,695241281 | 0,859038406 | 0,877907233 | 0,170052 |
| Q91XM9 | DLG2  | 1,077923218 | 0,953145935 | 1,013258584 | 0,955672263 | 0,889481392 | 0,891913016 | 0,880214595 | 0,892656726 | 1,072139388 | 0,925281023 | 0,1717   |
| Q68FF6 | GIT1  | 0,854744629 | 1,096303266 | 0,882089736 | 1,166862369 | 1,227212759 | 0,981860404 | 1,046307107 | 1,164000664 | 1,309539334 | 1,145784054 | 0,171752 |
| Q9QXS6 | DREB  | 0,877714236 | 0,954682649 | 1,134637924 | 1,032965191 | 0,932916093 | 0,766042176 | 0,889202208 | 0,925687713 | 0,994496753 | 0,901668989 | 0,171859 |
| P23198 | CBX3  | 0,747235364 | 1,154740494 | 1,137839571 | 0,960184572 | 0,087295782 | 0,939082502 | 1,065430683 | 0,739755444 | 0,562873863 | 0,678887655 | 0,171892 |
| Q8R0S2 | IQEC1 | 0,886280236 | 1,035297943 | 0,947337158 | 1,131084663 | 1,165721028 | 1,046284885 | 1,035186905 | 1,025640597 | 1,209255218 | 1,096417727 | 0,17336  |
| Q99PJ0 | NTRI  | 0,920983703 | 0,930291758 | 1,157650338 | 0,991074201 | 0,963190996 | 0,88686708  | 0,863881565 | 0,890203412 | 0,982860855 | 0,917400782 | 0,176436 |
| Q61937 | NPM   | 0,927662544 | 0,970586992 | 0,970237006 | 1,131513458 | 0,934741971 | 0,893357784 | 1,022951565 | 0,923344054 | 0,788234686 | 0,912526012 | 0,177295 |
| P62746 | RHOB  | 0,966328441 | 0,818649612 | 1,097884737 | 1,11713721  | 0,754321023 | 0,100984378 | 0,971797538 | 0,808544564 | 0,942896433 | 0,715708787 | 0,178567 |
| P67871 | CSK2B | 1,051199357 | 0,939951572 | 1,047030898 | 0,961818173 | 1,121666664 | 0,875874584 | 0,877190244 | 0,788540139 | 0,593791285 | 0,851412583 | 0,179623 |
| Q61735 | CD47  | 1,360002493 | 0,86567823  | 0,928265502 | 0,846053775 | 1,098352703 | 1,263037995 | 1,086657518 | 1,205162184 | 1,188057077 | 1,168253496 | 0,180241 |
| Q9Z2Y8 | PROSC | 0,89667322  | 0,753012403 | 1,142550588 | 1,207763788 | 0,908939962 | 0,99602219  | 0,982084715 | 0,182732557 | 0,101316495 | 0,634219184 | 0,182455 |
| Q9QZ23 | NFU1  | 1,147013193 | 0,65135011  | 1,069487438 | 1,13214926  | 0,945025407 | 0,683492204 | 0,91170417  | 0,906089212 | 0,549793829 | 0,799220965 | 0,182492 |
| Q9QXS1 | PLEC  | 1,001021201 | 1,003915676 | 0,994758274 | 1,000304848 | 1,161506179 | 1,021469951 | 0,978222747 | 1,030541895 | 1,067390582 | 1,051826271 | 0,182746 |
| O70443 | GNAZ  | 0,932527392 | 1,000159002 | 1,074665023 | 0,992648583 | 1,08662907  | 0,997361371 | 1,047833394 | 1,025402162 | 1,075958043 | 1,046636808 | 0,183343 |
| Q9Z218 | DPP6  | 0,891108861 | 1,033676499 | 1,05952142  | 1,01569322  | 0,985259809 | 1,0723363   | 1,091202896 | 1,035756229 | 1,202484491 | 1,077407945 | 0,183825 |
| O89053 | COR1A | 0,95175131  | 0,990293537 | 1,077063778 | 0,980891375 | 1,01993749  | 0,886266177 | 0,906977332 | 0,932572447 | 0,984554831 | 0,946061655 | 0,185089 |
| Q8VBY2 | KKCC1 | 0,957841598 | 1,022398067 | 0,93011265  | 1,089647685 | 0,550429214 | 0,055571496 | 0,912173247 | 0,980267974 | 0,989669648 | 0,697622316 | 0,185644 |
| Q3TTY5 | K22E  | 0,695658052 | 1,027605592 | 1,2819565   | 0,994779856 | 1,57260912  | 7,314832263 | 2,470185674 | 1,920326251 | 1,137211296 | 2,883032921 | 0,186163 |
| Q8QZT1 | THIL  | 0,956596702 | 1,026374443 | 0,991425349 | 1,025603506 | 1,053164582 | 0,999660332 | 1,016349645 | 1,013603214 | 1,075485804 | 1,031652715 | 0,186726 |
| Q8R3P0 | ACY2  | 1,069965034 | 0,959343893 | 0,945110189 | 1,025580884 | 1,044370377 | 0,784999067 | 1,013600887 | 0,883592295 | 0,741641604 | 0,893640846 | 0,187148 |
| P32020 | NLTP  | 0,857848422 | 0,993077833 | 1,111575945 | 1,0374978   | 0,841640727 | 0,965170599 | 0,954773338 | 0,965588743 | 0,864010003 | 0,918236682 | 0,187313 |
| F6SEU4 | SYGP1 | 0,805321088 | 0,838349786 | 1,226809305 | 1,129519821 | 0,94294801  | 0,765617676 | 0,797020743 | 0,633383849 | 0,998224611 | 0,827438978 | 0,18754  |
| Q8VDQ8 | SIR2  | 1,115504659 | 1,014994015 | 0,800270115 | 1,069231211 | 1,155036683 | 1,242975716 | 1,217820873 | 1,127520068 | 0,912614467 | 1,131193562 | 0,189215 |
| P68404 | KPCB  | 1,104446794 | 1,009986351 | 0,915910116 | 0,969656739 | 1,173403083 | 0,891623994 | 1,069243729 | 1,184220972 | 1,297538514 | 1,123206058 | 0,190112 |
| Q9Z2W9 | GRIA3 | 0,804405351 | 0,872059324 | 1,362435016 | 0,961100309 | 0,971507141 | 0,755648614 | 0,566643353 | 0,809115652 | 0,915069455 | 0,803596843 | 0,191161 |
| O54984 | ASNA  | 0,951339198 | 1,024006222 | 1,048729895 | 0,975924684 | 1,009820747 | 0,905346206 | 0,971372507 | 0,948119286 | 0,967546852 | 0,96044112  | 0,19229  |
| O35954 | PITM1 | 0,962084751 | 1,03950966  | 1,034999922 | 0,963405667 | 1,125043278 | 1,018679459 | 0,999089676 | 1,036347217 | 1,043012236 | 1,044434373 | 0,193527 |
| Q8K2C9 | HACD3 | 0,979072126 | 1,084415905 | 0,960587956 | 0,975924013 | 0,969342732 | 0,944925674 | 0,636086141 | 0,898906556 | 0,991921034 | 0,888236428 | 0,193529 |
| P62069 | UBP46 | 0,970863265 | 0,893454607 | 1,173252025 | 0,962430103 | 0,904072038 | 0,75799449  | 1,0398402   | 0,823335785 | 0,928886862 | 0,890825875 | 0,193587 |
| Q9Z140 | CPNE6 | 0,556343567 | 1,040252029 | 1,135766353 | 1,26763805  | 0,694579812 | 0,433007567 | 0,94446169  | 0,838053283 | 0,867573535 | 0,755535178 | 0,194355 |

|        |       |             |             |             |             |             |             |             |             |             |             |          |
|--------|-------|-------------|-------------|-------------|-------------|-------------|-------------|-------------|-------------|-------------|-------------|----------|
| Q92019 | WDR7  | 0,959353934 | 0,99440047  | 1,035292816 | 1,01095278  | 1,044248954 | 0,887567207 | 0,90049124  | 0,935648353 | 0,979267644 | 0,94944468  | 0,194774 |
| Q9CQI6 | COTL1 | 0,783539007 | 1,086425841 | 1,057060072 | 1,07297508  | 0,766168834 | 0,839854234 | 1,007725056 | 0,942888893 | 0,877566506 | 0,886840705 | 0,196015 |
| Q99LG2 | TNPO2 | 0,940299011 | 1,041397877 | 0,975654711 | 1,042648402 | 0,951885028 | 0,661132073 | 0,784618683 | 1,109564673 | 0,858347407 | 0,873109573 | 0,196291 |
| Q05920 | PYC   | 1,014557044 | 1,022495413 | 0,970022123 | 0,99292542  | 1,097701799 | 1,112059836 | 1,04757301  | 1,034451661 | 0,950478217 | 1,048452905 | 0,196624 |
| P51410 | RL9   | 0,855030348 | 1,016614178 | 0,994239697 | 1,134115777 | 0,911288742 | 0,885922807 | 1,031873582 | 0,908974252 | 0,773429769 | 0,90229783  | 0,197122 |
| P35293 | RAB18 | 0,862689446 | 1,030791346 | 1,055632377 | 1,050886831 | 0,91493417  | 0,863040057 | 1,030086648 | 0,963238834 | 0,759732946 | 0,906206531 | 0,197442 |
| P62962 | PROF1 | 0,827495646 | 1,075672273 | 1,076518376 | 1,020313705 | 0,905602709 | 0,906821175 | 0,979769286 | 0,924134722 | 0,895442735 | 0,922354125 | 0,197667 |
| Q8R464 | CADM4 | 1,032621852 | 1,006614173 | 0,897956876 | 1,062807099 | 0,971464232 | 1,097565911 | 1,190239427 | 1,099021975 | 1,018827933 | 1,075423895 | 0,197759 |
| P60824 | CIRBP | 0,987293312 | 0,932209564 | 1,151080427 | 0,929416697 | 0,873255839 | 0,910096926 | 0,988696197 | 0,969020831 | 0,884634822 | 0,925140923 | 0,197917 |
| Q80TJ1 | CAPS1 | 0,938093039 | 0,967602567 | 1,05555459  | 1,038749803 | 1,137709314 | 0,971622203 | 1,023692488 | 1,046272656 | 1,131852629 | 1,062229858 | 0,199167 |
| Q921F2 | TADBP | 1,135124822 | 0,923114077 | 0,86622986  | 1,075531241 | 1,152584775 | 1,170696804 | 1,069543365 | 1,020441093 | 1,045972155 | 1,091847638 | 0,199481 |
| Q8K310 | MATR3 | 0,800398426 | 1,094851637 | 0,982287765 | 1,122462172 | 1,247793009 | 1,101847893 | 1,131561901 | 0,967192409 | 1,131563937 | 1,11599183  | 0,199634 |
| Q8C522 | ENDD1 | 1,049313871 | 1,065367236 | 0,960046903 | 0,92527199  | 0,96165137  | 0,894583879 | 1,000804602 | 0,98268741  | 0,839628821 | 0,935871216 | 0,199821 |
| O88342 | WDR1  | 0,925815782 | 1,059264482 | 0,931727116 | 1,08319262  | 0,976505272 | 0,895837477 | 0,975264854 | 0,925382193 | 0,942244324 | 0,943046824 | 0,200738 |
| P35505 | FAAA  | 1,08264129  | 1,022413911 | 0,899532487 | 0,995412312 | 1,060210716 | 0,464423939 | 0,942189776 | 0,830893476 | 0,866941122 | 0,832931806 | 0,201031 |
| Q9DBT5 | AMPD2 | 0,923234404 | 1,118485785 | 0,939612976 | 1,018666835 | 0,958778606 | 0,90035999  | 0,890804846 | 0,803590595 | 0,024067473 | 0,715520302 | 0,201593 |
| O08539 | BIN1  | 1,040460607 | 1,051566179 | 0,924254429 | 0,983718785 | 1,083472224 | 0,938372658 | 1,084071175 | 1,147910631 | 1,074895645 | 1,065744467 | 0,202499 |
| Q62465 | VAT1  | 0,917823019 | 1,030116959 | 1,02145085  | 1,030609172 | 0,798478853 | 1,013790546 | 0,855096768 | 0,967495653 | 0,99151341  | 0,925275046 | 0,203099 |
| Q7TN29 | SMAP2 | 0,935159383 | 1,104062906 | 1,069766801 | 0,891010909 | 0,871849821 | 0,906883548 | 0,871700346 | 0,940210677 | 1,022143465 | 0,922557571 | 0,203455 |
| Q6NZL0 | SOGA3 | 1,307918582 | 1,358382521 | 1,145315762 | 0,188383136 | 1,533414749 | 1,539666753 | 1,369686859 | 1,170562811 | 1,1913065   | 1,360927535 | 0,203463 |
| Q8K0S0 | PHYIP | 0,802935805 | 1,001752089 | 1,174001686 | 1,02131042  | 0,936226347 | 0,837559748 | 0,874598413 | 0,809139008 | 0,999619849 | 0,891428673 | 0,203561 |
| P23242 | CXA1  | 1,045346345 | 0,937852875 | 0,912095029 | 1,104705751 | 0,941667276 | 0,810309973 | 1,095365829 | 0,856060155 | 0,717977456 | 0,884276138 | 0,204427 |
| Q8C854 | MYEF2 | 0,838193963 | 1,095013788 | 1,056970353 | 1,009821896 | 1,314503852 | 0,899158543 | 1,007386024 | 1,316527013 | 1,217149173 | 1,150944921 | 0,204552 |
| Q9Z1G4 | VPP1  | 0,931186591 | 1,012005915 | 1,037135738 | 1,019671756 | 1,111188524 | 1,012871226 | 0,997369276 | 1,011940941 | 1,146265657 | 1,055927125 | 0,206287 |
| Q91YJ2 | SNX4  | 0,877502149 | 1,02027717  | 1,01000682  | 1,092213861 | 0,854057065 | 0,653092246 | 0,88267058  | 1,020883897 | 1,001674353 | 0,882475628 | 0,206415 |
| P14148 | RL7   | 0,856438797 | 1,004389674 | 1,09070622  | 1,048465309 | 0,877713189 | 0,930507062 | 1,030815731 | 0,885301909 | 0,892233844 | 0,923314347 | 0,206949 |
| Q9R1P0 | PSA4  | 0,966490681 | 1,012956754 | 0,965995619 | 1,054556946 | 0,911102922 | 0,419467942 | 0,91582266  | 1,078721961 | 0,79237543  | 0,823498183 | 0,207252 |
| O35658 | C1QBP | 1,023618849 | 0,974310613 | 0,978686498 | 1,023384041 | 0,99885019  | 1,003411289 | 0,994416738 | 0,870740439 | 0,830715735 | 0,939626878 | 0,207526 |
| Q61598 | GDIB  | 0,989576638 | 1,024755022 | 0,999762067 | 0,985906273 | 1,009664189 | 0,943489961 | 1,116973541 | 1,103585314 | 1,093365422 | 1,053415685 | 0,207995 |
| Q9QXV0 | PCSK1 | 0,7896073   | 0,941125801 | 1,145192234 | 1,124074665 | 0,676065354 | 0,771312455 | 1,034188884 | 0,950912563 | 0,855214565 | 0,857538764 | 0,208489 |
| P63321 | RALA  | 1,032502857 | 0,962474917 | 1,001191778 | 1,003830447 | 1,063449298 | 1,074870607 | 1,069402741 | 0,998578577 | 0,976219459 | 1,036504136 | 0,209098 |
| Q8BSL7 | ARF2  | 0,903478107 | 1,125415624 | 1,002926293 | 0,968179976 | 0,95272279  | 0,435472429 | 1,050912707 | 0,966536431 | 0,634056262 | 0,807940124 | 0,209297 |
| Q91WD5 | NDUS2 | 1,040988458 | 0,999606454 | 0,995351503 | 0,964053585 | 0,931304141 | 0,850124766 | 0,995832029 | 0,969888209 | 1,009357122 | 0,951301253 | 0,20961  |
| Q8C3Q5 | SHSA7 | 0,886191097 | 0,95639637  | 1,122782111 | 1,034630422 | 0,971289911 | 0,771835691 | 0,951751853 | 0,979723423 | 0,893656762 | 0,913651528 | 0,209638 |
| Q91YR1 | TWF1  | 0,956717684 | 1,040369827 | 0,897862937 | 1,105049552 | 1,06657598  | 0,933566153 | 0,921468639 | 0,778785625 | 0,818265839 | 0,903732447 | 0,209811 |
| Q61481 | PDE1A | 0,933328039 | 0,966482339 | 1,100377928 | 0,999811694 | 0,930167611 | 0,777362154 | 0,985011606 | 0,972892488 | 0,96388166  | 0,925863104 | 0,209943 |
| Q9Z239 | PLM   | 1,202810692 | 1,416667991 | 1,290118603 | 0,090402713 | 1,17910882  | 1,855328197 | 1,628841216 | 1,165363595 | 1,30884431  | 1,427497228 | 0,210264 |
| Q60854 | SPB6  | 0,961338857 | 1,077812058 | 0,94044062  | 1,020408465 | 1,024834041 | 1,030379595 | 1,099719525 | 1,000292493 | 1,081364793 | 1,04731809  | 0,211528 |
| P21995 | EMB   | 0,952594171 | 1,074909807 | 0,927662836 | 1,044833186 | 1,056725376 | 1,017761509 | 1,114694481 | 0,98983783  | 1,10591216  | 1,056986271 | 0,212695 |
| Q8CGY8 | OGT1  | 0,926570806 | 0,976806821 | 1,071686797 | 1,024935576 | 0,980304801 | 0,828376317 | 0,960328299 | 0,918279964 | 1,006476257 | 0,938753128 | 0,21289  |

|        |       |             |             |             |             |             |             |             |             |             |             |          |
|--------|-------|-------------|-------------|-------------|-------------|-------------|-------------|-------------|-------------|-------------|-------------|----------|
| Q8BG39 | SV2B  | 0,99328751  | 0,854788327 | 1,136279064 | 1,015645099 | 1,257444856 | 0,992330656 | 1,044390463 | 1,022686775 | 1,255046042 | 1,114379758 | 0,212965 |
| Q9CPX8 | QCR10 | 0,902176982 | 1,139828434 | 1,076169132 | 0,881825451 | 0,959751086 | 0,843891852 | 0,851995981 | 1,042212242 | 0,761354679 | 0,891841168 | 0,213157 |
| P23818 | GRIA1 | 0,457239054 | 1,155324883 | 1,07305276  | 1,314383303 | 0,75707558  | 0,669514302 | 0,71950059  | 0,032333589 | 1,080171577 | 0,651719128 | 0,213169 |
| Q8BXZ1 | TMX3  | 1,020563596 | 1,077599579 | 0,891390796 | 1,010446028 | 0,927935779 | 0,573895728 | 1,050509659 | 0,964978889 | 0,799415048 | 0,863347021 | 0,214299 |
| Q9JMA1 | UBP14 | 0,878483252 | 1,172878381 | 0,923247535 | 1,025390832 | 0,94922197  | 1,033535606 | 1,190030304 | 1,346993309 | 1,13691701  | 1,13133964  | 0,214342 |
| P63101 | 1433Z | 1,074536165 | 0,955309757 | 0,971903476 | 0,998250601 | 1,07124231  | 1,134195859 | 1,012577515 | 1,011455856 | 1,015146502 | 1,048923609 | 0,214479 |
| P06801 | MAOX  | 1,019140202 | 1,05151657  | 0,916138032 | 1,013205196 | 1,035637281 | 0,999514793 | 1,120381847 | 1,082061503 | 1,010297266 | 1,049578538 | 0,214682 |
| Q9CQW2 | ARL8B | 0,976522843 | 1,109423214 | 0,85144167  | 1,062612273 | 0,822677517 | 0,69393882  | 1,073291809 | 0,949064253 | 0,865162759 | 0,880827032 | 0,214842 |
| P16332 | MUTA  | 1,024092498 | 1,031681266 | 0,860475982 | 1,083750253 | 0,969160302 | 1,113914703 | 1,070324894 | 1,146434095 | 1,070461233 | 1,074059045 | 0,21509  |
| Q8R016 | BLMH  | 1,016268053 | 1,00874452  | 0,993480588 | 0,981506839 | 1,058577741 | 0,952308176 | 1,060852808 | 1,065112946 | 1,032471552 | 1,033864645 | 0,217057 |
| Q9JM14 | NT5C  | 0,831965415 | 0,912045883 | 1,075162629 | 1,180826073 | 0,906706616 | 0,879782022 | 0,943451064 | 0,897034257 | 0,897258513 | 0,904846494 | 0,217111 |
| Q8CA95 | PDE10 | 1,372078473 | 0,9952104   | 0,988376882 | 0,644334244 | 1,118095141 | 1,136474728 | 0,989347709 | 1,4474875   | 1,44771061  | 1,227823138 | 0,217147 |
| Q9D023 | MPC2  | 1,116012763 | 0,983180752 | 1,014794226 | 0,886012259 | 0,954250238 | 0,976209854 | 0,948305244 | 0,947870127 | 0,785093449 | 0,922345782 | 0,217302 |
| P62918 | RL8   | 0,873391629 | 0,949721169 | 0,968728987 | 1,208158214 | 0,916262907 | 0,985698274 | 1,000903353 | 0,774012908 | 0,669073137 | 0,869190116 | 0,217709 |
| Q9R0Y5 | KAD1  | 0,982886616 | 0,99536137  | 1,02654761  | 0,995204404 | 1,003481925 | 0,993600923 | 0,995742942 | 0,942484386 | 0,891212654 | 0,965304566 | 0,218288 |
| Q9JHU9 | INO1  | 0,778311109 | 0,957153574 | 1,123660591 | 1,140874725 | 0,738802527 | 0,021895288 | 0,87655565  | 0,979135809 | 0,945660155 | 0,712409886 | 0,221994 |
| Q8CAY6 | THIC  | 0,702618088 | 1,02113476  | 1,167983046 | 1,108264106 | 0,974052187 | 0,780156678 | 1,03747788  | 0,55513729  | 0,763018287 | 0,821968464 | 0,222287 |
| Q9D7H3 | RTCA  | 0,933446331 | 1,181880837 | 0,995094304 | 0,889578528 | 0,845045419 | 0,064626031 | 0,965697046 | 0,921815805 | 0,869419196 | 0,733320699 | 0,222547 |
| P47757 | CAPZB | 0,889297643 | 0,973970268 | 1,003725865 | 1,133006224 | 0,993936944 | 1,04660692  | 1,11292128  | 1,109608685 | 1,078040539 | 1,068222874 | 0,222664 |
| P35564 | CALX  | 0,977148727 | 1,065119931 | 0,965252386 | 0,992478957 | 1,011697891 | 1,07605904  | 1,048427432 | 0,978806271 | 1,080888958 | 1,039175918 | 0,226993 |
| P61161 | ARP2  | 0,831425455 | 1,020379981 | 1,051635592 | 1,096558972 | 1,059462984 | 0,961656097 | 1,125290555 | 1,117701973 | 1,167847903 | 1,086391902 | 0,227115 |
| Q61644 | PACN1 | 0,953320655 | 1,03072435  | 1,033399732 | 0,982555263 | 1,060988561 | 1,013796131 | 1,044048611 | 0,979775585 | 1,06839843  | 1,033401464 | 0,22714  |
| Q6P5F9 | XPO1  | 0,984194484 | 1,015722279 | 0,929494145 | 1,070589092 | 0,864213737 | 0,897062012 | 0,955189103 | 0,845672758 | 1,078918535 | 0,928211229 | 0,22727  |
| Q9DCT1 | AKCL2 | 1,236325722 | 1,341184751 | 1,355038893 | 0,067450634 | 1,191860084 | 1,438691126 | 1,5513694   | 1,466488472 | 1,237233756 | 1,377128568 | 0,227413 |
| Q9EPL8 | IPO7  | 0,843973411 | 0,994851426 | 1,184906117 | 0,976269045 | 0,887346519 | 0,888077142 | 0,892365267 | 0,909444597 | 0,989909611 | 0,913428627 | 0,227883 |
| Q8COP5 | COR2A | 1,378163167 | 0,870140621 | 0,834915795 | 0,916780418 | 0,956889242 | 0,828266583 | 0,768417134 | 0,912015231 | 0,737860045 | 0,840689647 | 0,230207 |
| Q9WVE8 | PACN2 | 0,852309887 | 1,161055298 | 1,012186964 | 0,974447852 | 1,142976011 | 0,919181883 | 1,347411213 | 1,38031034  | 0,990042627 | 1,155984415 | 0,230355 |
| Q8BWT1 | THIM  | 0,979804537 | 0,983077131 | 1,056444173 | 0,98067416  | 0,197440846 | 0,865455483 | 1,000166409 | 0,796156691 | 1,016943149 | 0,775232516 | 0,230514 |
| P16330 | CN37  | 1,107190537 | 1,069513411 | 0,822701804 | 1,000594248 | 1,118026084 | 1,131558262 | 1,17979052  | 1,15188067  | 0,919501184 | 1,100151344 | 0,231075 |
| Q9R1V6 | ADA22 | 1,028481767 | 1,025420269 | 1,099095798 | 0,847002166 | 0,936229561 | 0,900791205 | 0,927667731 | 0,809963928 | 1,024196641 | 0,919769813 | 0,231526 |
| Q62059 | CSPG2 | 0,984704008 | 1,080910068 | 0,958313701 | 0,976072222 | 0,867857358 | 0,680393714 | 0,847653758 | 0,938022465 | 1,117360262 | 0,890257511 | 0,231815 |
| P62259 | 1433E | 1,036247878 | 0,954274604 | 0,939864269 | 1,069613249 | 1,087103249 | 1,204029829 | 1,121213648 | 1,09327775  | 0,902760447 | 1,081676985 | 0,23191  |
| Q9CQ92 | FIS1  | 0,890747987 | 1,14337256  | 1,025339173 | 0,94054028  | 1,038540978 | 1,608523401 | 1,14517227  | 0,989903387 | 1,101484232 | 1,176724854 | 0,232044 |
| Q9Z1R2 | BAG6  | 0,891798312 | 1,020866351 | 1,073649972 | 1,013685365 | 0,985830524 | 0,911578638 | 0,919886854 | 0,828044228 | 1,022277743 | 0,933523597 | 0,232092 |
| Q8BP47 | SYNC  | 0,805251671 | 1,037149472 | 1,042578704 | 1,115020152 | 0,904529478 | 0,677533045 | 0,976541663 | 0,963630705 | 0,919287405 | 0,888304459 | 0,23223  |
| Q9ERI6 | RDH14 | 1,054306307 | 0,921745873 | 0,962790188 | 1,061157632 | 0,960351453 | 1,097487879 | 0,788915972 | 0,789165971 | 0,892340758 | 0,905652407 | 0,233301 |
| O08583 | THOC4 | 0,884447311 | 0,995918291 | 1,101894684 | 1,017739714 | 1,205334834 | 1,290968483 | 1,154093694 | 0,829104743 | 1,154959961 | 1,126892343 | 0,23354  |
| Q61016 | GBG7  | 1,002616697 | 0,819798742 | 1,387159845 | 0,790424716 | 1,030888233 | 1,138297336 | 1,040224455 | 1,307613007 | 1,537763974 | 1,210957401 | 0,234596 |
| P54830 | PTN5  | 1,061215054 | 1,053815332 | 1,083828419 | 0,801141194 | 1,0370675   | 1,00398173  | 0,976716292 | 1,362145346 | 1,600338961 | 1,196049966 | 0,235212 |
| P31786 | ACBP  | 0,694050723 | 0,992372498 | 1,195626353 | 1,117950427 | 0,584972287 | 0,680430382 | 0,951124606 | 1,006518962 | 0,907510602 | 0,826111368 | 0,236052 |



|        |       |             |             |             |             |             |             |             |             |             |             |          |
|--------|-------|-------------|-------------|-------------|-------------|-------------|-------------|-------------|-------------|-------------|-------------|----------|
| P45952 | ACADM | 0,998562616 | 0,962520018 | 1,021230603 | 1,017686763 | 0,976012301 | 1,025163422 | 0,987495468 | 0,902219398 | 0,934766026 | 0,965131323 | 0,236302 |
| O88569 | ROA2  | 0,954055694 | 0,990320026 | 0,994218064 | 1,061406216 | 1,015530883 | 0,90906608  | 0,979235575 | 0,951953702 | 0,964193766 | 0,963996001 | 0,237011 |
| Q9DCH4 | EIF3F | 0,92897551  | 0,98972536  | 1,079150639 | 1,002148491 | 1,002323644 | 0,843539614 | 0,922986814 | 0,945898036 | 1,005622229 | 0,944074067 | 0,237441 |
| P11983 | TCPA  | 0,925247636 | 1,056414802 | 0,957094066 | 1,061243496 | 1,03349804  | 0,98684792  | 1,075462316 | 1,15765343  | 1,033921153 | 1,057476572 | 0,237745 |
| Q6PFR5 | TRA2A | 0,947734373 | 0,93718212  | 1,089431364 | 1,025652143 | 0,906552377 | 0,484450269 | 0,967275692 | 1,047684458 | 0,854420528 | 0,852076665 | 0,238493 |
| O55026 | ENTP2 | 0,838511226 | 0,977014426 | 1,078570578 | 1,105903769 | 0,720047529 | 0,639265076 | 0,948143226 | 1,000919803 | 1,024745118 | 0,86662415  | 0,238751 |
| P63216 | GBG3  | 0,795422965 | 0,912539213 | 1,342350886 | 0,949686936 | 0,757772797 | 0,067709871 | 0,827017975 | 0,810142851 | 1,109540567 | 0,714436812 | 0,239424 |
| P28652 | KCC2B | 0,927437145 | 1,10215508  | 0,973829756 | 0,996578019 | 1,070693856 | 0,969162155 | 1,019017935 | 1,093414413 | 1,188240696 | 1,068105811 | 0,239578 |
| Q7TSJ2 | MAP6  | 1,107314566 | 1,04340728  | 0,901649445 | 0,947628709 | 1,034408412 | 0,836434704 | 0,956048905 | 0,901746282 | 0,920374244 | 0,929802509 | 0,242489 |
| Q9DBP5 | KCY   | 0,972987967 | 0,964959298 | 1,016851931 | 1,045200805 | 1,014774012 | 1,000684873 | 1,063872157 | 1,064677381 | 1,004060934 | 1,029613871 | 0,243145 |
| Q91X97 | NCALD | 1,198545963 | 0,887377284 | 1,013483132 | 0,900593621 | 1,135440313 | 0,718367241 | 1,00996251  | 0,675853487 | 0,632924634 | 0,834509637 | 0,243597 |
| P34022 | RANG  | 0,986139014 | 0,932785132 | 1,03908261  | 1,041993245 | 0,923572668 | 0,867904337 | 1,03231032  | 0,958494968 | 0,974537587 | 0,951363976 | 0,245279 |
| Q62277 | SYPH  | 0,887773204 | 0,862732767 | 1,127395987 | 1,122098043 | 0,787677832 | 0,919796076 | 0,884589394 | 0,94743191  | 0,989579287 | 0,9058149   | 0,245593 |
| P19096 | FAS   | 0,940301837 | 1,064172836 | 0,984580866 | 1,010944462 | 1,108312593 | 1,13810853  | 1,018741877 | 0,99318619  | 0,999882396 | 1,051646317 | 0,246167 |
| Q9D5T0 | ATAD1 | 0,963535932 | 1,119771109 | 0,846145367 | 1,070547592 | 0,924394284 | 0,898868487 | 0,846712991 | 1,07492724  | 0,731590228 | 0,895298646 | 0,246446 |
| P42932 | TCPQ  | 0,924244275 | 1,093082122 | 0,969054163 | 1,01361944  | 1,046335715 | 0,97822896  | 1,071222644 | 1,127939832 | 1,040833781 | 1,052912186 | 0,246841 |
| Q60625 | ICAM5 | 0,448358711 | 0,78691433  | 1,611465995 | 1,153260964 | 0,684444433 | 0,430980081 | 0,593046633 | 0,654456114 | 1,064774581 | 0,685540368 | 0,24724  |
| Q63912 | OMGP  | 0,929314268 | 0,904777954 | 1,045184772 | 1,120723006 | 0,793553956 | 0,614093286 | 0,915219494 | 0,922453471 | 1,108036539 | 0,870671349 | 0,247504 |
| Q91VR7 | MLP3A | 0,795106374 | 0,96779521  | 1,214842643 | 1,022255774 | 0,9680735   | 1,000213864 | 1,253077938 | 1,326956231 | 1,142092952 | 1,138082897 | 0,247676 |
| Q91V61 | SFXN3 | 1,053691743 | 0,923261474 | 1,11044821  | 0,912598572 | 0,979065853 | 0,897545964 | 0,881699713 | 0,905757637 | 1,011133446 | 0,935040523 | 0,24857  |
| Q9DCS9 | NDUBA | 1,038508687 | 0,971342046 | 0,966128902 | 1,024020366 | 0,936123174 | 0,976477045 | 1,037867748 | 0,951631856 | 0,918986268 | 0,964217218 | 0,248918 |
| O35682 | MYADM | 1,156943351 | 0,94670385  | 1,023997071 | 0,872355728 | 1,058776801 | 0,958076381 | 0,90949936  | 0,786141876 | 0,786769487 | 0,899852781 | 0,249197 |
| P03930 | ATP8  | 0,75368758  | 1,062303752 | 1,245445231 | 0,938563437 | 0,817168999 | 0,786630447 | 0,958289062 | 0,995320919 | 0,789946824 | 0,86947125  | 0,249686 |
| Q3TXS7 | PSMD1 | 0,526332809 | 1,388553874 | 1,325276486 | 0,759836831 | 1,35550945  | 1,130832946 | 1,364852765 | 1,182160128 | 1,18161065  | 1,242993188 | 0,250935 |
| P70188 | KIFA3 | 1,037752072 | 1,025366412 | 1,02422933  | 0,912652186 | 0,968103627 | 0,897146226 | 1,074301947 | 0,768585816 | 0,904404298 | 0,922508383 | 0,252495 |
| P70336 | ROCK2 | 1,021168374 | 1,018580736 | 0,981638414 | 0,978612476 | 1,155442578 | 1,02304604  | 0,985120444 | 0,979095966 | 1,118504602 | 1,052241926 | 0,252779 |
| Q6PGN3 | DCLK2 | 1,075778418 | 1,235632902 | 0,671781548 | 1,016807132 | 1,22432417  | 1,130144209 | 1,117280732 | 1,03407917  | 1,182711781 | 1,137708012 | 0,252858 |
| Q8BMS1 | ECHA  | 1,02501808  | 1,073492857 | 0,871475642 | 1,030013421 | 1,002490177 | 1,203928735 | 1,114510318 | 1,019922329 | 1,02152764  | 1,07247584  | 0,253331 |
| Q9CQD1 | RAB5A | 0,961202514 | 0,966031895 | 1,082502004 | 0,990263587 | 0,948632253 | 1,02338107  | 1,013730721 | 0,858892352 | 0,860832602 | 0,9410938   | 0,253442 |
| Q2PFD7 | PSD3  | 0,989916443 | 0,799100649 | 1,202527702 | 1,008455206 | 0,826903623 | 0,829186791 | 0,957703951 | 0,916715708 | 0,970217704 | 0,900145555 | 0,254017 |
| P97447 | FHL1  | 0,956735861 | 0,864345117 | 1,024870698 | 1,154048324 | 0,855589362 | 0,972681204 | 0,965189543 | 0,936746867 | 0,904506662 | 0,926942727 | 0,254416 |
| P63094 | GNAS2 | 1,001517593 | 1,037884538 | 0,869361401 | 1,091236468 | 0,920560837 | 0,793508414 | 1,0301921   | 1,030025903 | 0,618481676 | 0,878553786 | 0,255197 |
| P27546 | MAP4  | 1,104124312 | 1,036690018 | 0,902889355 | 0,956296315 | 1,00380354  | 0,936787793 | 1,000436382 | 0,805490251 | 0,901468228 | 0,929597239 | 0,255591 |
| P11798 | KCC2A | 0,84321134  | 0,969379134 | 1,161621372 | 1,025788155 | 0,887632364 | 0,687983168 | 0,95444862  | 0,956021434 | 0,990527433 | 0,895322604 | 0,256377 |
| P47963 | RL13  | 0,848636627 | 1,003077791 | 1,01911223  | 1,129173352 | 0,945357259 | 0,925151179 | 1,01256938  | 0,880159865 | 0,880513381 | 0,928750213 | 0,257501 |
| Q922J6 | TSN2  | 1,080798724 | 0,990424229 | 0,79723607  | 1,131540977 | 1,031392744 | 1,536462367 | 1,321021507 | 1,080723097 | 0,909837099 | 1,175887363 | 0,257573 |
| P52196 | THTR  | 1,013765694 | 1,004010856 | 0,963168131 | 1,019055318 | 1,01382547  | 0,984110293 | 0,996567887 | 0,907513647 | 0,744729644 | 0,929349388 | 0,257656 |
| P48758 | CBR1  | 0,964683948 | 0,979764297 | 1,004076778 | 1,051474976 | 1,013273283 | 1,047314917 | 1,130088255 | 0,989073067 | 1,01923225  | 1,039796354 | 0,257726 |
| Q6PDL0 | DC1L2 | 1,105394605 | 1,010551392 | 0,945791927 | 0,938262076 | 1,054066521 | 0,896051059 | 0,941037697 | 0,943061689 | 0,849263502 | 0,936696093 | 0,257888 |
| Q9CPQ8 | ATP5L | 0,879255648 | 1,036113238 | 1,180538512 | 0,904092602 | 0,731384848 | 0,928435757 | 1,054475919 | 0,850151831 | 0,910231455 | 0,894935962 | 0,257936 |

|        |       |             |             |             |             |             |             |             |             |             |             |          |
|--------|-------|-------------|-------------|-------------|-------------|-------------|-------------|-------------|-------------|-------------|-------------|----------|
| Q9DD18 | DTD1  | 0,990821269 | 0,944984001 | 1,015468842 | 1,048725888 | 0,974000528 | 1,04048388  | 0,983337539 | 0,885374577 | 0,816698795 | 0,939979064 | 0,258439 |
| P46097 | SYT2  | 0,990023669 | 1,116228712 | 0,915935413 | 0,977812205 | 0,9819252   | 0,981641211 | 1,039556419 | 0,703299544 | 0,788575431 | 0,898999561 | 0,258912 |
| P48725 | PCNT  | 0,947794872 | 1,008660116 | 1,019208721 | 1,024336291 | 0,96421912  | 0,943203546 | 0,99273182  | 1,010767686 | 0,962119435 | 0,974608321 | 0,259033 |
| P60879 | SNP25 | 1,106395764 | 0,978704477 | 0,926291244 | 0,988608514 | 1,108733763 | 0,971063552 | 1,091751327 | 1,087968897 | 1,01558455  | 1,055020418 | 0,259359 |
| P62751 | RL23A | 0,964780994 | 1,085228492 | 0,935076895 | 1,014913619 | 0,634749135 | 0,963909077 | 0,956767098 | 0,967377475 | 0,98102613  | 0,900765783 | 0,259404 |
| O35295 | PURB  | 0,849665012 | 0,982780319 | 1,01312426  | 1,154430409 | 0,942589197 | 0,877350825 | 0,972187222 | 0,991425024 | 0,803127284 | 0,91733591  | 0,259767 |
| P63330 | PP2AA | 0,925132522 | 0,922439988 | 1,04168319  | 1,1107443   | 0,99832626  | 0,956370522 | 0,946000191 | 0,943017812 | 0,869158759 | 0,942574709 | 0,261074 |
| Q6P5E4 | UGGG1 | 0,952567644 | 1,132139885 | 1,092976521 | 0,822315949 | 0,922822938 | 1,020461856 | 0,881441901 | 0,945778583 | 0,568344393 | 0,867769934 | 0,261329 |
| Q9QZ06 | TOLIP | 0,933764182 | 1,000538193 | 0,998326048 | 1,067371576 | 1,002309202 | 0,950462856 | 0,978474397 | 0,981721995 | 0,870532325 | 0,956700155 | 0,261732 |
| P04370 | MBP   | 1,01566364  | 1,099579885 | 0,828550051 | 1,056206425 | 1,110716011 | 1,092185099 | 1,124601858 | 1,134558768 | 0,941320265 | 1,0806764   | 0,261904 |
| O35526 | STX1A | 1,077953763 | 0,870906613 | 1,128921608 | 0,922218015 | 1,295211763 | 1,050708367 | 0,993988544 | 1,058842433 | 1,087637159 | 1,097277653 | 0,262185 |
| Q9R1P3 | PSB2  | 1,080484271 | 0,90956696  | 0,761573894 | 1,248374875 | 0,792473373 | 0,571899668 | 1,006092269 | 0,974063835 | 0,878069808 | 0,84451979  | 0,26333  |
| P56379 | 68MP  | 0,846834619 | 0,977647486 | 1,34370915  | 0,831808745 | 0,868393008 | 1,121260888 | 1,317456785 | 1,28013364  | 1,265528913 | 1,170554647 | 0,263897 |
| Q8BL65 | ABLM2 | 0,97126792  | 0,917828932 | 1,115478743 | 0,995424405 | 0,95743865  | 1,009671432 | 0,961782899 | 0,872830257 | 0,927064642 | 0,945757576 | 0,264289 |
| Q8R3V5 | SHLB2 | 0,937126515 | 1,036014109 | 1,072001132 | 0,954858244 | 0,967189276 | 0,872155671 | 0,992158329 | 0,881504098 | 1,020481085 | 0,946697692 | 0,265717 |
| P14206 | RSSA  | 0,915890155 | 1,039050719 | 1,045912221 | 0,999146905 | 0,978362579 | 0,895624797 | 1,00173863  | 0,949289518 | 0,973898937 | 0,959782892 | 0,266242 |
| P19536 | COX5B | 0,946981231 | 0,885892105 | 1,095353713 | 1,071772952 | 1,002814647 | 1,051907538 | 1,225518924 | 1,097475846 | 1,007478986 | 1,077039188 | 0,267138 |
| P68510 | 1433F | 0,974207919 | 0,990985248 | 1,006043821 | 1,028763012 | 1,023829971 | 0,983494547 | 1,008326252 | 0,887662654 | 0,79273262  | 0,939209209 | 0,26753  |
| Q8BVE3 | VATH  | 0,940652518 | 1,016507986 | 1,038520845 | 1,004318651 | 0,939481326 | 0,927693447 | 0,981136519 | 0,978783445 | 1,017120405 | 0,968843028 | 0,268057 |
| Q61704 | ITIH3 | 1,045664238 | 1,191010625 | 0,843415316 | 0,919909821 | 0,836357161 | 0,992158152 | 0,797384351 | 0,94340411  | 0,954852944 | 0,904831344 | 0,268085 |
| P08226 | APOE  | 1,101818688 | 1,008362497 | 0,953623597 | 0,936195218 | 0,975735023 | 0,926157836 | 0,993445181 | 0,961333372 | 0,927291511 | 0,956792585 | 0,269427 |
| Q8BYI9 | TENR  | 0,939311915 | 1,037997449 | 1,019706069 | 1,002984566 | 1,121575424 | 1,000206046 | 0,992212996 | 1,040292785 | 1,037938939 | 1,038445238 | 0,27015  |
| Q8CHP8 | PGP   | 0,941262574 | 0,855545129 | 0,975666448 | 1,227525849 | 1,100697542 | 0,993333334 | 1,159475609 | 1,205029653 | 1,036335671 | 1,098974362 | 0,270926 |
| Q9CXS4 | CENPV | 0,872977074 | 1,049846269 | 1,114241191 | 0,962935465 | 0,915624699 | 0,88037     | 1,018773917 | 0,909595346 | 0,957028856 | 0,936278564 | 0,27255  |
| Q9JHI5 | IVD   | 0,959034413 | 1,039836814 | 0,979928521 | 1,021200251 | 0,899672074 | 1,017192436 | 1,023245557 | 0,955322871 | 0,895514255 | 0,958189438 | 0,272711 |
| O70161 | PI51C | 1,018961708 | 1,03415228  | 0,89848325  | 1,048402762 | 1,145807662 | 0,972298995 | 0,980615584 | 1,052369362 | 1,210931793 | 1,072404679 | 0,272885 |
| Q8VE22 | RT23  | 1,042739591 | 0,96645788  | 1,167142162 | 0,823660367 | 0,665373286 | 0,873364911 | 1,040014382 | 0,994454298 | 0,848348699 | 0,884311115 | 0,273858 |
| Q9DBE8 | ALG2  | 1,023174538 | 1,026348076 | 0,805565494 | 1,144911893 | 0,957110701 | 0,922345922 | 0,937413082 | 0,978011392 | 0,737316559 | 0,906439531 | 0,275974 |
| Q80X14 | PI42B | 0,881703263 | 1,036280899 | 1,068839766 | 1,013176072 | 1,080575295 | 0,92198275  | 1,131098872 | 1,204574012 | 1,041032681 | 1,075852722 | 0,278168 |
| Q9QZQ8 | H2AY  | 0,912386548 | 1,041456229 | 0,953921848 | 1,092235375 | 0,975436889 | 0,865263532 | 1,044758448 | 0,919472589 | 0,896462468 | 0,940278785 | 0,278258 |
| Q9CXW4 | RL11  | 0,884491585 | 1,009737853 | 1,145656225 | 0,960114337 | 1,006216951 | 0,896744477 | 0,977788742 | 0,86786012  | 0,128478829 | 0,775417824 | 0,27995  |
| Q810U3 | NFASC | 0,99381787  | 1,060987902 | 0,985647768 | 0,959546461 | 1,06884352  | 1,072513719 | 1,016111874 | 0,981697858 | 1,019892675 | 1,031811929 | 0,280831 |
| Q9D8N0 | EF1G  | 0,949556613 | 1,047044006 | 1,027106771 | 0,976292609 | 0,973859468 | 0,923366449 | 1,024103249 | 0,971416235 | 0,947202915 | 0,967989663 | 0,280837 |
| Q4KMM3 | OXR1  | 0,848846445 | 1,063324942 | 0,975635705 | 1,112192907 | 1,211030587 | 0,991026278 | 1,026254926 | 1,029403274 | 1,146796631 | 1,080902339 | 0,282219 |
| Q9WTP6 | KAD2  | 1,001166104 | 0,994222261 | 1,000918023 | 1,003693612 | 0,915821683 | 1,016680079 | 0,561258227 | 1,022516043 | 0,92597437  | 0,88845008  | 0,283815 |
| Q8BJU0 | SGTA  | 0,95786202  | 0,975029692 | 1,117360094 | 0,949748194 | 1,014731142 | 0,984230922 | 0,948609507 | 0,933647908 | 0,834462923 | 0,943136481 | 0,284448 |
| P42208 | SEPT2 | 1,046541435 | 0,96754842  | 0,973524074 | 1,012386071 | 1,025283317 | 0,945479441 | 1,078883053 | 1,236240299 | 1,042509479 | 1,065679118 | 0,284467 |
| P35486 | ODPA  | 1,014720568 | 0,980273943 | 0,996078301 | 1,008927188 | 0,996675545 | 0,910831566 | 1,022233363 | 0,994770462 | 0,930239536 | 0,970950095 | 0,285794 |
| Q80U28 | MADD  | 0,924711534 | 1,037007743 | 0,966623845 | 1,071656878 | 1,091639117 | 0,797065879 | 0,684478051 | 0,9322364   | 0,99386316  | 0,899856521 | 0,285925 |
| Q61425 | HCDH  | 1,151579991 | 0,95712367  | 0,863520369 | 1,027775969 | 1,076089424 | 1,296259616 | 1,004403444 | 1,114184717 | 0,985072745 | 1,095201989 | 0,286096 |

|        |       |             |             |             |             |             |             |             |             |             |             |          |
|--------|-------|-------------|-------------|-------------|-------------|-------------|-------------|-------------|-------------|-------------|-------------|----------|
| Q8R1Q8 | DC1L1 | 1,060893819 | 1,108551587 | 1,087066268 | 0,743488326 | 1,179166878 | 1,033043095 | 1,115738286 | 1,070867566 | 1,066868795 | 1,093136924 | 0,286929 |
| Q8K221 | ARFP2 | 0,999281616 | 0,975707563 | 1,035997302 | 0,989013519 | 1,042769423 | 0,746133826 | 0,955731894 | 0,842574707 | 1,033999331 | 0,924241836 | 0,287844 |
| P08249 | MDHM  | 0,987343822 | 0,959575076 | 0,979220813 | 1,07386029  | 0,918492565 | 1,081876444 | 0,918970329 | 0,901350424 | 0,927828761 | 0,949703704 | 0,288887 |
| P62264 | RS14  | 0,868512951 | 1,042387321 | 1,111391417 | 0,977708311 | 0,912011673 | 0,934822709 | 1,053330372 | 0,778711067 | 0,936641157 | 0,923103396 | 0,290104 |
| P19157 | GSTP1 | 0,97868995  | 0,966040634 | 1,006938039 | 1,048331378 | 1,008478708 | 1,063778403 | 1,166872648 | 1,111091923 | 0,930292056 | 1,056102748 | 0,290405 |
| P10637 | TAU   | 1,002064017 | 1,031826941 | 0,951691581 | 1,01441746  | 1,038175528 | 0,977201374 | 0,934566497 | 0,860925816 | 0,98013637  | 0,958201117 | 0,290781 |
| P17710 | HXK1  | 0,958786277 | 1,053003085 | 0,984888476 | 1,003322161 | 1,008259821 | 1,034511831 | 1,028154581 | 0,987248607 | 1,096940845 | 1,031023137 | 0,292313 |
| P63318 | KPCG  | 0,959377124 | 0,942429838 | 1,054718144 | 1,043474894 | 0,692808147 | 0,873750099 | 1,019403302 | 0,956193515 | 1,032543835 | 0,91493978  | 0,293654 |
| P14094 | AT1B1 | 1,011990288 | 0,998484437 | 0,995845432 | 0,993679843 | 0,91189385  | 1,017583173 | 0,977279777 | 0,983685384 | 0,994234288 | 0,976935294 | 0,293985 |
| Q9CZM2 | RL15  | 0,680948128 | 1,080935542 | 1,006739028 | 1,231377303 | 0,851432649 | 0,924169234 | 1,02817688  | 0,744299215 | 0,791023096 | 0,867820215 | 0,295072 |
| O08529 | CAN2  | 0,949794587 | 1,10063144  | 0,913233063 | 1,036340909 | 0,699737061 | 0,979805042 | 0,962181928 | 0,996312149 | 0,9511196   | 0,917831156 | 0,295394 |
| P35802 | GPM6A | 0,911851547 | 0,895008908 | 1,158528179 | 1,034611366 | 0,9929654   | 1,041182204 | 0,979362606 | 0,702852459 | 0,740832936 | 0,891439121 | 0,296102 |
| P01831 | THY1  | 0,991433465 | 0,94665173  | 1,046896403 | 1,015018403 | 1,031338684 | 0,976983299 | 0,996713202 | 0,909770629 | 0,870981357 | 0,957157434 | 0,296859 |
| P43276 | H15   | 0,917391717 | 0,900314562 | 1,057934294 | 1,124359427 | 0,971493852 | 1,13732669  | 1,091185865 | 0,996797826 | 1,166672729 | 1,072695392 | 0,297623 |
| Q9QYS2 | GRM3  | 0,921305877 | 0,851768733 | 1,093865145 | 1,133060245 | 1,195607134 | 0,782971772 | 1,121429644 | 1,245888818 | 1,358130732 | 1,14080562  | 0,298316 |
| Q9D8W5 | PSD12 | 0,976927117 | 0,874090981 | 1,148765449 | 1,000216453 | 0,98440502  | 0,997656649 | 1,128671608 | 1,139783909 | 1,097722322 | 1,069647902 | 0,299675 |
| O55022 | PGRC1 | 0,828700313 | 0,972017383 | 1,105754101 | 1,093528203 | 0,770803529 | 0,922256008 | 1,04294502  | 0,936335688 | 0,907112623 | 0,915890574 | 0,299814 |
| Q8CHH9 | SEPT8 | 1,046824486 | 1,046560105 | 0,910769604 | 0,995845806 | 1,112875456 | 0,975955627 | 1,037668228 | 1,094926143 | 1,006345317 | 1,045554154 | 0,29983  |
| Q9EP69 | SAC1  | 1,126349009 | 1,084172691 | 0,86731449  | 0,92216381  | 0,861124287 | 1,00246845  | 0,968501426 | 0,953256806 | 0,857193164 | 0,928508826 | 0,301911 |
| Q7TQF7 | AMPH  | 0,929491602 | 0,991169849 | 1,088916433 | 0,990422116 | 1,042812987 | 0,885379748 | 0,897173435 | 0,843813556 | 1,029476408 | 0,939731227 | 0,302858 |
| Q9WVJ2 | PSD13 | 1,126068113 | 0,909607412 | 1,011244478 | 0,953079997 | 0,996928224 | 0,890308212 | 1,090626102 | 0,816950981 | 0,773933213 | 0,913749346 | 0,304008 |
| P19246 | NFH   | 1,246573891 | 1,127523352 | 0,727277172 | 0,898625585 | 1,261531337 | 1,362815231 | 1,123658903 | 1,12093706  | 0,88770393  | 1,151329292 | 0,30417  |
| Q9WV85 | NDK3  | 0,775881123 | 1,117516126 | 1,036010503 | 1,070592248 | 0,916856601 | 0,084367932 | 1,022279587 | 0,871843794 | 0,954420452 | 0,769953673 | 0,304291 |
| P18872 | GNAO  | 0,941484912 | 0,941696495 | 1,068464282 | 1,048354311 | 1,023754413 | 1,025060638 | 1,071640462 | 1,049851626 | 1,009107777 | 1,035882983 | 0,304322 |
| Q8CIE6 | COPA  | 0,91897358  | 0,952264834 | 1,107475698 | 1,021285888 | 0,990876981 | 1,008320102 | 0,797791115 | 0,042201606 | 0,986930067 | 0,765223974 | 0,306204 |
| Q3TYX3 | SMYD5 | 0,952456875 | 0,946684618 | 1,112615112 | 0,988243395 | 1,01179029  | 0,996284973 | 0,91727207  | 0,959964052 | 0,859994958 | 0,949061268 | 0,306322 |
| P58281 | OPA1  | 0,954088294 | 1,017791652 | 1,0387951   | 0,989324954 | 1,022605547 | 1,003952631 | 1,015903276 | 1,012156691 | 1,227017296 | 1,056327088 | 0,306923 |
| Q9Z110 | P5CS  | 0,938501754 | 1,095451299 | 1,018120844 | 0,947926102 | 1,084838122 | 1,13398481  | 1,04969204  | 0,977735769 | 1,002297155 | 1,049709579 | 0,307224 |
| P03995 | GFAP  | 0,950430432 | 1,210816101 | 0,785127365 | 1,053626102 | 0,892421912 | 0,833555618 | 1,07193537  | 0,910705947 | 0,743365358 | 0,890396841 | 0,30733  |
| Q6ZQ38 | CAND1 | 0,913551585 | 1,017427879 | 1,038818544 | 1,030201993 | 1,101128614 | 1,119933529 | 0,995405598 | 0,948583508 | 1,084606628 | 1,049931575 | 0,308502 |
| O35593 | PSDE  | 0,806509746 | 1,076943808 | 1,089249768 | 1,027296678 | 0,962843648 | 0,981399795 | 0,972791445 | 0,896074149 | 0,812676219 | 0,925157051 | 0,308982 |
| Q99KC8 | VMA5A | 0,909759023 | 1,137762987 | 0,921450461 | 1,031027529 | 0,869704447 | 0,872362727 | 1,014389241 | 0,976781118 | 0,953837956 | 0,937415098 | 0,309757 |
| P70280 | VAMP7 | 0,934105355 | 0,940708721 | 1,02510635  | 1,100079574 | 0,920862105 | 0,726925376 | 0,941715061 | 1,133039044 | 0,812340594 | 0,906976436 | 0,30999  |
| P45376 | ALDR  | 0,618738693 | 0,969256781 | 1,316907532 | 1,095096994 | 0,951005234 | 0,774499531 | 0,851741463 | 0,871868282 | 0,826635171 | 0,855149936 | 0,310062 |
| Q920E5 | FPPS  | 1,011599955 | 0,991463842 | 0,921743037 | 1,075193165 | 1,053312856 | 0,946562336 | 0,868465982 | 0,948669893 | 0,111313985 | 0,78566501  | 0,31039  |
| P62267 | RS23  | 0,767277103 | 1,197011831 | 0,914784703 | 1,120926363 | 1,003834332 | 1,507126281 | 1,281276546 | 0,990896808 | 1,00541862  | 1,157710518 | 0,312676 |
| P30416 | FKBP4 | 1,023550457 | 1,071475086 | 0,970635254 | 0,934339203 | 0,986614882 | 1,02739179  | 0,976046224 | 0,929383454 | 0,807227924 | 0,945332855 | 0,314188 |
| P35235 | PTN11 | 0,984883074 | 1,116371993 | 0,906753647 | 0,991991286 | 1,053006006 | 1,046015904 | 1,024850459 | 1,081392063 | 1,013368938 | 1,043726674 | 0,314339 |
| P00493 | HPRT  | 0,883366681 | 1,020267538 | 1,014204491 | 1,082161289 | 0,944837864 | 0,984270537 | 1,148352906 | 1,271521059 | 1,062912679 | 1,082379009 | 0,314725 |
| Q505F5 | LR47  | 1,153755142 | 0,95383547  | 0,853829398 | 1,038579989 | 1,006146138 | 0,19475927  | 1,01471652  | 0,828112755 | 0,95889359  | 0,800525655 | 0,315486 |

|        |       |             |             |             |             |             |             |             |             |             |             |          |
|--------|-------|-------------|-------------|-------------|-------------|-------------|-------------|-------------|-------------|-------------|-------------|----------|
| P21107 | TPM3  | 0,983162013 | 1,030171321 | 1,018028741 | 0,968637926 | 1,001277835 | 0,750221426 | 1,018668575 | 0,964778444 | 0,960269781 | 0,939043212 | 0,315615 |
| P62821 | RAB1A | 1,333905786 | 1,037536361 | 0,379015044 | 1,249542809 | 1,228406774 | 1,531628514 | 1,098638536 | 1,183907241 | 1,094269847 | 1,227370183 | 0,315972 |
| Q9JMH9 | MY18A | 1,264070634 | 1,376713215 | 1,338052715 | 0,021163435 | 1,466976411 | 0,858410857 | 1,415876828 | 1,558588707 | 1,427882349 | 1,34554703  | 0,316055 |
| Q922E4 | PCY2  | 0,878767141 | 1,030615446 | 1,034591031 | 1,056026381 | 1,004540164 | 0,99482699  | 0,851575593 | 0,884140954 | 0,990398747 | 0,94509649  | 0,317555 |
| P56375 | ACYP2 | 0,871241293 | 1,058072453 | 1,20649948  | 0,864186773 | 0,845645858 | 0,855156883 | 1,051013061 | 0,85857137  | 0,93741296  | 0,909560027 | 0,320799 |
| Q06138 | CAB39 | 1,359205116 | 0,450590325 | 0,920092074 | 1,270112485 | 1,246178126 | 1,289214978 | 1,124040199 | 1,352294321 | 1,019909354 | 1,206327396 | 0,321325 |
| P63038 | CH60  | 1,010910615 | 1,034197604 | 0,928904204 | 1,025987577 | 0,960387226 | 1,007019349 | 0,964871894 | 0,949877555 | 0,988386087 | 0,974108422 | 0,321546 |
| Q8BH44 | COR2B | 1,162966831 | 1,040244336 | 0,850810437 | 0,945978395 | 0,966589432 | 0,770346575 | 0,900917198 | 1,021179701 | 0,938149761 | 0,919436533 | 0,321809 |
| Q8BU30 | SYIC  | 0,913787027 | 1,110496351 | 1,064717492 | 0,91099913  | 1,072238671 | 1,00816796  | 0,141842516 | 0,876927646 | 0,862547477 | 0,792344854 | 0,322425 |
| Q80WG5 | LRC8A | 0,998260228 | 1,170135575 | 0,78086114  | 1,050743057 | 1,110992034 | 1,023782067 | 1,053839462 | 1,145435042 | 1,066482304 | 1,080106182 | 0,324283 |
| Q5PR73 | DIRA2 | 1,070216495 | 0,944849148 | 0,981489358 | 1,003444999 | 1,26308664  | 0,99650457  | 1,035400648 | 1,105541443 | 0,949687901 | 1,070044241 | 0,324418 |
| Q80Y17 | L2GL1 | 0,880922982 | 1,188510274 | 0,93304657  | 0,997520173 | 1,088940167 | 0,98961286  | 1,248093594 | 1,038829049 | 1,045280777 | 1,082151289 | 0,324713 |
| Q7TMS5 | ABCG2 | 1,64829191  | 0,062963689 | 1,081521929 | 1,207222472 | 1,6282356   | 1,321943089 | 1,272304071 | 1,180640917 | 1,225338454 | 1,325692426 | 0,325087 |
| Q60870 | REEP5 | 1,11251552  | 1,045765035 | 0,736728932 | 1,104990514 | 1,177759841 | 1,559380021 | 1,273065809 | 0,962408886 | 0,866854    | 1,167893712 | 0,325556 |
| P84309 | ADCY5 | 1,020423204 | 0,926937105 | 1,268631657 | 0,784008034 | 1,20585632  | 0,917954527 | 0,828709879 | 1,424957454 | 1,668520263 | 1,209199689 | 0,326492 |
| Q9CQ75 | NDUA2 | 0,888460323 | 1,026531852 | 1,176922269 | 0,908085556 | 0,801123819 | 0,95597232  | 1,052386708 | 0,874982296 | 0,91961419  | 0,920815867 | 0,327085 |
| Q7TMF3 | NDUAC | 0,926306864 | 0,95274476  | 1,079554192 | 1,041394185 | 0,940960317 | 1,017969719 | 1,199882699 | 1,121442649 | 1,033490502 | 1,062749177 | 0,328997 |
| P14869 | RLA0  | 0,908550415 | 1,072145937 | 0,976586663 | 1,042716985 | 1,049612841 | 1,007441577 | 0,895609361 | 0,923042071 | 0,848833437 | 0,944907857 | 0,32929  |
| Q8BRT1 | CLAP2 | 1,063100498 | 1,052290433 | 0,907443024 | 0,977166045 | 0,957113066 | 0,959177174 | 0,993242599 | 0,927716596 | 0,982530119 | 0,963955911 | 0,329338 |
| O70318 | E41L2 | 0,940048929 | 1,095261547 | 0,997767955 | 0,966921569 | 0,919179602 | 1,147196636 | 1,062238693 | 1,047785527 | 1,097728581 | 1,054825808 | 0,329853 |
| Q8COM9 | ASGL1 | 0,95984023  | 0,998421055 | 1,028522408 | 1,013216307 | 0,917429241 | 1,06179368  | 1,028702074 | 0,901036501 | 0,82331902  | 0,946456103 | 0,330209 |
| Q9D3A9 | TTYH1 | 0,935330709 | 1,067401857 | 1,020612296 | 0,976655138 | 1,005820513 | 0,818211235 | 0,945907369 | 0,904570531 | 1,052104577 | 0,945322845 | 0,330708 |
| P08003 | PDIA4 | 1,050229287 | 0,984471092 | 0,888655223 | 1,076644398 | 0,295576986 | 0,968007519 | 1,001328743 | 0,802885869 | 1,077301066 | 0,829020037 | 0,331032 |
| Q8BFZ9 | ERLN2 | 0,971333315 | 1,031599266 | 0,989625785 | 1,007441634 | 0,937805723 | 0,957140502 | 1,008073718 | 0,91547767  | 1,036558961 | 0,971011315 | 0,331924 |
| Q60972 | RBBP4 | 0,895467173 | 1,009997709 | 1,042572843 | 1,051962275 | 0,892658655 | 0,029464748 | 1,028042484 | 0,974624572 | 0,954400154 | 0,775838123 | 0,332483 |
| Q9D1E6 | TBCB  | 0,90507116  | 0,987698208 | 0,978075446 | 1,129155186 | 0,87518712  | 0,612946069 | 0,948673096 | 1,002130626 | 1,057573748 | 0,899302131 | 0,334666 |
| Q99KE1 | MAOM  | 1,030762176 | 1,02675676  | 1,037449007 | 0,905032057 | 1,171081553 | 0,952508338 | 0,930563324 | 1,168607481 | 1,117846091 | 1,068121358 | 0,335619 |
| P84244 | H33   | 0,804171603 | 1,105520628 | 0,96154258  | 1,12876519  | 0,747710734 | 0,91294217  | 1,123048216 | 0,895247817 | 0,820094993 | 0,899808786 | 0,337084 |
| Q6NXX7 | DPP10 | 0,945449869 | 1,005095416 | 1,127975627 | 0,921479088 | 1,118508237 | 1,081285359 | 0,961060001 | 1,019234645 | 1,085297578 | 1,053077164 | 0,337089 |
| P02535 | K1C10 | 0,949387896 | 1,079047421 | 1,060878603 | 0,910686081 | 1,232413833 | 5,439364002 | 1,325072103 | 1,06488153  | 0,953517687 | 2,003049831 | 0,338981 |
| Q80TLO | PPM1E | 0,871428476 | 1,027404878 | 1,005505506 | 1,095661139 | 0,926490639 | 0,974994652 | 0,997258426 | 0,850260061 | 0,987183996 | 0,947237555 | 0,339191 |
| P67984 | RL22  | 0,750542265 | 1,05740579  | 1,105361236 | 1,08669071  | 0,779942923 | 0,916090595 | 0,969099126 | 1,010847208 | 0,882273696 | 0,91165071  | 0,339359 |
| P26883 | FKB1A | 0,575317262 | 0,914352259 | 1,512836365 | 0,997494114 | 0,623882485 | 0,682879349 | 0,938900974 | 0,81659608  | 0,97802427  | 0,808056632 | 0,339839 |
| Q91VR2 | ATPG  | 1,033638122 | 0,940444344 | 0,973915737 | 1,052001797 | 0,963320703 | 1,009522364 | 1,023924021 | 0,932006999 | 0,879366901 | 0,961628198 | 0,340346 |
| Q8K406 | LGI3  | 0,980396787 | 1,245353354 | 0,850514909 | 0,92373495  | 1,194891416 | 1,143008546 | 1,054700952 | 1,074343762 | 0,976035651 | 1,088596065 | 0,34104  |
| P10649 | GSTM1 | 0,930497178 | 1,026667421 | 0,978355785 | 1,064479617 | 0,960236639 | 1,265295442 | 1,167735509 | 1,041334283 | 0,944724747 | 1,075865324 | 0,342198 |
| P61255 | RL26  | 1,118148155 | 0,653562348 | 0,942861166 | 1,285428331 | 0,980789196 | 0,845622016 | 1,035165585 | 0,809262997 | 0,562259521 | 0,846619863 | 0,343455 |
| Q9CZ30 | OLA1  | 0,891457182 | 1,07081057  | 0,947098633 | 1,090633615 | 0,977253553 | 0,785841192 | 0,906694205 | 1,035453023 | 0,969413178 | 0,93493103  | 0,343859 |
| Q8BKC5 | IPO5  | 0,953201231 | 1,014341679 | 1,027791608 | 1,004665482 | 0,929917331 | 0,931907966 | 0,959550703 | 0,960029164 | 1,061867081 | 0,968654449 | 0,344673 |
| O08586 | PTEN  | 0,212763912 | 1,2016273   | 1,255783129 | 1,32982566  | 1,366260119 | 1,334477462 | 1,151113653 | 1,293115906 | 1,07187672  | 1,243368772 | 0,34493  |

|        |       |             |             |             |             |             |             |             |             |             |             |          |
|--------|-------|-------------|-------------|-------------|-------------|-------------|-------------|-------------|-------------|-------------|-------------|----------|
| Q922S4 | PDE2A | 0,956110925 | 1,091546189 | 1,127683092 | 0,824659794 | 0,929113106 | 1,055455234 | 1,029136463 | 1,155559989 | 1,31730914  | 1,097314786 | 0,345226 |
| Q6WVG3 | KCD12 | 0,935545787 | 0,976697987 | 1,013277737 | 1,074478489 | 0,909422654 | 0,82574017  | 0,948342483 | 0,926642339 | 1,101681959 | 0,942365921 | 0,346657 |
| O55131 | SEPT7 | 1,10835666  | 0,969216263 | 0,971940955 | 0,950486121 | 1,09565906  | 0,964032621 | 1,062264447 | 1,089934573 | 1,005332823 | 1,043444705 | 0,347273 |
| Q00612 | G6PD1 | 1,02544096  | 1,066294349 | 0,924424421 | 0,98384027  | 0,957399909 | 0,932597231 | 0,970562128 | 1,056770482 | 0,851641864 | 0,953794323 | 0,347793 |
| Q8R0A7 | K0513 | 0,864530731 | 1,02321454  | 1,265064388 | 0,847190341 | 0,822714673 | 0,941915075 | 0,961941571 | 0,891047401 | 0,931994507 | 0,909922645 | 0,34785  |
| Q9D394 | RUFY3 | 1,045990656 | 1,040964959 | 0,977060719 | 0,935983666 | 1,0849038   | 1,017890682 | 1,05552378  | 1,025801121 | 0,973833948 | 1,031590666 | 0,348656 |
| Q6P542 | ABCF1 | 1,094878546 | 0,958036464 | 0,939498332 | 1,007586658 | 1,047417307 | 0,91208121  | 0,878719405 | 1,0026008   | 0,9250302   | 0,953169785 | 0,348727 |
| Q64433 | CH10  | 0,787766933 | 1,101434856 | 1,124903903 | 0,985894307 | 0,763098299 | 0,957499755 | 0,962856062 | 1,001309601 | 0,900966661 | 0,917146075 | 0,348793 |
| Q91VM5 | RMXL1 | 0,902732506 | 0,95691525  | 1,093657078 | 1,046695166 | 0,964667566 | 0,885635722 | 0,988102333 | 0,912552766 | 1,015396119 | 0,953270901 | 0,348864 |
| P32921 | SYWC  | 0,966632414 | 1,117929327 | 0,970303492 | 0,945134768 | 1,022009538 | 1,078196312 | 1,047798744 | 0,985090814 | 1,065514733 | 1,039722028 | 0,349489 |
| Q99MK8 | ARBK1 | 1,032880987 | 1,016198071 | 1,09414146  | 0,856779482 | 1,083102839 | 1,030059529 | 0,877928336 | 0,627680453 | 0,878913483 | 0,899536928 | 0,349535 |
| Q99KV1 | DJB11 | 0,935006557 | 0,983224948 | 1,011339011 | 1,070429485 | 1,030019471 | 1,026649908 | 0,921377669 | 0,893922462 | 0,922776033 | 0,958949109 | 0,350303 |
| P20029 | GRP78 | 0,959935398 | 1,059753191 | 1,011791308 | 0,968520103 | 1,031076225 | 1,023721226 | 1,024303973 | 0,967618552 | 1,151454111 | 1,039634817 | 0,351727 |
| Q8CCK0 | H2AW  | 0,998783638 | 1,061050727 | 0,897992921 | 1,042172714 | 1,034491743 | 0,918799903 | 0,931905418 | 0,969683466 | 0,948967644 | 0,960769635 | 0,352687 |
| P35979 | RL12  | 0,857684549 | 1,009082382 | 1,058902894 | 1,074330175 | 0,959912395 | 1,151325735 | 1,093824348 | 0,984036705 | 1,113233422 | 1,060466521 | 0,352834 |
| Q9JM63 | KCJ10 | 1,019767635 | 1,112549188 | 0,860247339 | 1,007435838 | 1,11596525  | 1,667279359 | 0,966316603 | 1,007712199 | 1,013433356 | 1,154141353 | 0,35325  |
| Q78ZA7 | NP1L4 | 0,97329316  | 0,99019629  | 0,920212171 | 1,116298378 | 0,938885773 | 0,956908835 | 1,300286327 | 1,120090871 | 1,093901502 | 1,082014662 | 0,353699 |
| P63005 | LIS1  | 1,044226388 | 0,988028161 | 1,016720201 | 0,95102525  | 1,044866987 | 0,918483465 | 0,959076511 | 0,971458781 | 0,96153488  | 0,971084125 | 0,354354 |
| Q6ZPE2 | MTMR5 | 1,33987275  | 0,851166166 | 0,859540305 | 0,949420779 | 1,002523543 | 0,493647695 | 0,921291535 | 0,975828375 | 0,882798856 | 0,855218001 | 0,354721 |
| E9Q6P5 | TTC7B | 0,966913243 | 1,013785337 | 0,921436197 | 1,097865223 | 0,984822363 | 0,866044317 | 0,844113364 | 1,053437995 | 0,977395256 | 0,945162659 | 0,355688 |
| Q9R1P4 | PSA1  | 1,026904629 | 1,007906621 | 0,939470233 | 1,025718518 | 1,018378883 | 0,991765969 | 1,012497166 | 0,845554063 | 0,928193091 | 0,959277834 | 0,355772 |
| P62823 | RAB3C | 1,793473954 | 0,494618986 | 1,036552067 | 0,675354993 | 0,628078375 | 0,616083034 | 0,691586499 | 1,009777822 | 0,750322869 | 0,73916972  | 0,358282 |
| P62270 | RS18  | 0,837355187 | 1,030313729 | 1,101769598 | 1,030561486 | 0,851517717 | 0,936573294 | 1,067790388 | 0,930940759 | 0,896730155 | 0,936710462 | 0,359236 |
| O54916 | REPS1 | 0,890078019 | 0,921390124 | 1,101381853 | 1,087150004 | 1,015965893 | 1,113629274 | 1,036049898 | 0,94982862  | 1,27166202  | 1,077427141 | 0,359372 |
| Q7TNG5 | EMAL2 | 1,062324487 | 1,115845319 | 0,906828452 | 0,915001742 | 1,046256664 | 1,050067307 | 0,853075174 | 0,848067589 | 0,850851644 | 0,929663676 | 0,359471 |
| P63085 | MK01  | 0,744539719 | 0,994925628 | 1,23164875  | 1,028885903 | 0,969496879 | 0,881787825 | 0,870842289 | 0,861976142 | 0,966044864 | 0,9100296   | 0,359715 |
| Q8BUV3 | GEPH  | 0,991479253 | 1,029683581 | 0,977071363 | 1,001765802 | 1,063423715 | 0,952982985 | 1,055100652 | 1,046029591 | 1,005567003 | 1,024620789 | 0,360932 |
| Q9CQV8 | 1433B | 1,116882925 | 0,887954536 | 0,88694713  | 1,108215409 | 0,968664388 | 1,057796089 | 0,992392636 | 0,84586616  | 0,643489287 | 0,901641712 | 0,360994 |
| Q9QYA2 | TOM40 | 0,986077912 | 1,055423787 | 1,049848844 | 0,908649456 | 1,040952435 | 0,915292374 | 1,052203524 | 0,914151972 | 0,429964782 | 0,870513018 | 0,361864 |
| Q9CPP6 | NDUA5 | 0,792722388 | 1,059446288 | 1,00896683  | 1,138864494 | 0,81759449  | 0,955329967 | 0,970245099 | 0,930929347 | 0,972320106 | 0,929283802 | 0,364009 |
| P47911 | RL6   | 0,903828402 | 1,039033424 | 1,004861006 | 1,052277168 | 1,018108803 | 0,928351164 | 0,958654511 | 0,918964131 | 0,997887821 | 0,964393286 | 0,364053 |
| Q9WU78 | PDC6I | 0,966488995 | 1,069433629 | 0,947044208 | 1,017033168 | 1,02318458  | 0,920516724 | 0,964920702 | 0,94865428  | 0,990866462 | 0,969628549 | 0,36409  |
| Q9EQH3 | VPS35 | 0,930510694 | 1,022407916 | 1,01894032  | 1,028141071 | 0,965384446 | 0,880253047 | 0,974604964 | 0,924571134 | 1,061874511 | 0,96133762  | 0,364319 |
| Q9R0P5 | DEST  | 0,915731763 | 1,073508741 | 0,972316701 | 1,038442794 | 0,943203449 | 1,032148118 | 1,241622961 | 1,1359689   | 0,98118886  | 1,066826458 | 0,364579 |
| Q9EPR5 | SORC2 | 0,760592698 | 1,086120483 | 1,055730577 | 1,097556243 | 0,548405008 | 0,99972587  | 0,03114328  | 1,14909976  | 1,069810243 | 0,759636832 | 0,365078 |
| Q9Z0E0 | NCDN  | 0,847302885 | 1,05835053  | 1,051956463 | 1,042390122 | 0,952463466 | 0,851033951 | 0,953544888 | 0,890848409 | 1,060569409 | 0,941692025 | 0,365169 |
| Q8VEJ9 | VPS4A | 0,998241794 | 1,008440811 | 1,033874087 | 0,959443308 | 1,007384359 | 0,905810203 | 0,959420329 | 1,062320958 | 0,854615319 | 0,957910234 | 0,366766 |
| Q9CQJ3 | GMFB  | 0,947624117 | 1,106442065 | 1,080644516 | 0,865289303 | 0,914672123 | 0,971075834 | 1,075575649 | 0,884689747 | 0,813833797 | 0,93196943  | 0,366853 |
| Q8C0E2 | VP26B | 0,998871633 | 1,030791053 | 0,953373607 | 1,016963708 | 0,801782876 | 0,739176773 | 1,07418944  | 0,933506634 | 1,071531662 | 0,924037477 | 0,36793  |
| Q61361 | PGCB  | 0,989640077 | 0,864037724 | 1,123562899 | 1,0227593   | 0,969180158 | 0,954599171 | 0,92751926  | 0,927327458 | 0,98710058  | 0,953145325 | 0,369392 |

|        |       |             |             |             |             |             |             |             |             |             |             |          |
|--------|-------|-------------|-------------|-------------|-------------|-------------|-------------|-------------|-------------|-------------|-------------|----------|
| P35980 | RL18  | 0,572174747 | 1,028394153 | 1,211335617 | 1,188095483 | 0,242653497 | 0,771978921 | 1,025939421 | 0,990025785 | 0,961080341 | 0,798335593 | 0,369674 |
| Q9JLZ3 | AUHM  | 1,102626484 | 0,948849811 | 0,870329728 | 1,078193977 | 0,987420438 | 1,034358517 | 0,978748075 | 0,887842834 | 0,763887419 | 0,930451457 | 0,370046 |
| P35803 | GPM6B | 1,054071797 | 0,927336401 | 1,091543616 | 0,927048186 | 0,982803411 | 1,067050012 | 1,068962244 | 0,963365435 | 1,230058713 | 1,062447963 | 0,370399 |
| Q9JME5 | AP3B2 | 0,84849642  | 1,087332667 | 1,022433551 | 1,041737362 | 1,17687696  | 1,056049866 | 0,977089112 | 1,007893865 | 1,067978041 | 1,057177569 | 0,37281  |
| P28271 | ACOC  | 0,977124153 | 1,020169422 | 0,971287682 | 1,031418743 | 0,941795599 | 1,166749612 | 0,998381731 | 0,996419252 | 1,144084885 | 1,049486216 | 0,375118 |
| P60202 | MYPR  | 1,122561046 | 1,082958919 | 0,772416502 | 1,022063533 | 1,142021903 | 1,256150202 | 1,288982922 | 1,016952281 | 0,843442293 | 1,10950992  | 0,375499 |
| Q3V3R1 | C1TM  | 0,887997078 | 1,029939945 | 1,137016547 | 0,94504643  | 0,037769126 | 0,920456563 | 0,969869057 | 0,959869545 | 1,068583877 | 0,791309634 | 0,375618 |
| Q8K3H0 | DP13A | 0,906087944 | 0,994288711 | 1,007361004 | 1,092262342 | 0,993351517 | 0,823396209 | 0,958624418 | 0,956423764 | 1,025532085 | 0,951465599 | 0,376699 |
| Q8R5M8 | CADM1 | 0,885117824 | 0,958734785 | 1,159415979 | 0,996731411 | 0,887505886 | 0,793008413 | 0,870633182 | 0,850566995 | 1,171129951 | 0,914568886 | 0,377102 |
| Q01065 | PDE1B | 1,095944379 | 0,929710409 | 1,102280332 | 0,87206488  | 1,096791669 | 0,826330641 | 0,977304597 | 1,280722298 | 1,452677225 | 1,126765286 | 0,379699 |
| Q8BY89 | CTL2  | 0,811968585 | 1,24964806  | 1,165139278 | 0,773244077 | 1,010146694 | 0,843728538 | 1,253224224 | 1,331148818 | 1,259433928 | 1,13953644  | 0,379729 |
| P62881 | GBB5  | 1,018328723 | 0,952389119 | 1,021327271 | 1,007954887 | 1,09216105  | 1,009628676 | 1,022082938 | 1,085417702 | 0,947158444 | 1,031289762 | 0,38049  |
| Q9R1Q9 | VAS1  | 0,986467979 | 0,92783582  | 1,061512247 | 1,024183954 | 0,843364239 | 0,831837685 | 1,01737439  | 1,095997823 | 0,916944116 | 0,941103651 | 0,380631 |
| Q9DBL7 | COASY | 1,235785704 | 1,371938162 | 1,148708898 | 0,243567237 | 1,349298132 | 1,188857773 | 1,137067952 | 1,228259359 | 1,167558563 | 1,214208356 | 0,380635 |
| Q62167 | DDX3X | 0,868986036 | 0,998673966 | 1,019772957 | 1,112567041 | 0,943525567 | 0,917138544 | 1,008881218 | 0,891102532 | 1,000379064 | 0,952205385 | 0,381762 |
| Q9CR95 | NECP1 | 0,877690975 | 1,102770001 | 1,011256664 | 1,00828236  | 1,040982431 | 0,933798987 | 0,913708158 | 0,896514748 | 0,980761063 | 0,953153077 | 0,382523 |
| Q9CY64 | BIEA  | 1,125599715 | 0,893853354 | 0,839202282 | 1,141344649 | 1,069684892 | 0,97839606  | 1,16720802  | 1,192026358 | 0,987550403 | 1,078973147 | 0,382987 |
| Q01768 | NDKB  | 0,900235741 | 1,016410806 | 1,014081387 | 1,069272067 | 0,87446418  | 0,961327745 | 1,104557661 | 0,918628947 | 0,872581147 | 0,946311936 | 0,383365 |
| Q99KB8 | GLO2  | 0,999582725 | 0,897343481 | 1,00372303  | 1,099350764 | 0,974477777 | 1,104460033 | 0,979722864 | 0,825855668 | 0,73728728  | 0,924360724 | 0,383836 |
| Q8BTX9 | HSDL1 | 0,864972256 | 1,051290082 | 0,96969295  | 1,114044712 | 0,965624313 | 0,944698263 | 1,024116212 | 0,98980231  | 0,703853985 | 0,925619017 | 0,383883 |
| Q91Z61 | DIRA1 | 1,035623022 | 1,01011437  | 0,932122595 | 1,022140014 | 1,071000326 | 1,180445636 | 1,06004876  | 1,055102365 | 0,892925155 | 1,051904448 | 0,384494 |
| P70290 | EM55  | 1,02287172  | 0,982811947 | 1,031214285 | 0,963102048 | 1,119073967 | 1,035932169 | 0,988206328 | 1,003076876 | 0,996111082 | 1,028480084 | 0,385528 |
| Q9D051 | ODPB  | 1,02519841  | 0,995024268 | 0,966278483 | 1,01349884  | 1,030620784 | 0,997171092 | 1,047350596 | 1,056946595 | 0,968528911 | 1,020123596 | 0,386142 |
| P26638 | SYSC  | 0,990305382 | 1,045386783 | 1,0006346   | 0,963673235 | 1,064718816 | 0,828993788 | 0,996530669 | 0,949852797 | 0,946925807 | 0,957404375 | 0,387041 |
| Q640R3 | HECAM | 1,069336935 | 1,068929083 | 0,876617931 | 0,985116051 | 0,975818987 | 1,307205935 | 1,093063535 | 1,016598834 | 0,97879255  | 1,074295968 | 0,388846 |
| P28658 | ATX10 | 0,817553746 | 1,033276678 | 0,941797661 | 1,207371915 | 0,858952145 | 0,967356191 | 1,034688224 | 0,906313649 | 0,857326155 | 0,924927273 | 0,388873 |
| P27601 | GNA13 | 1,015141936 | 0,967246197 | 1,030308519 | 0,987303348 | 0,970243639 | 0,945715251 | 0,987935101 | 1,045461305 | 0,93369599  | 0,976610257 | 0,388907 |
| Q9ESJ4 | SPN90 | 0,895831618 | 1,062332634 | 0,955840898 | 1,085994851 | 1,149384459 | 0,847168085 | 1,029723132 | 1,171798751 | 1,173865763 | 1,074388038 | 0,390406 |
| P68254 | 1433T | 1,219371208 | 0,754225804 | 1,092856365 | 0,933546623 | 0,942343805 | 1,063533293 | 0,881029793 | 0,872408526 | 0,765794388 | 0,905021961 | 0,392623 |
| Q5SSL4 | ABR   | 0,845326657 | 1,068181877 | 1,005894545 | 1,080596922 | 0,917087885 | 0,923763114 | 1,000783952 | 0,978192554 | 0,948751189 | 0,953715739 | 0,392744 |
| P62874 | GBB1  | 0,73741826  | 0,899405065 | 1,20084507  | 1,162331605 | 0,763369709 | 1,126297592 | 0,847206982 | 0,805233445 | 0,908237047 | 0,890068955 | 0,393048 |
| A2ALS5 | RPGP1 | 0,968115142 | 0,99497337  | 1,016098926 | 1,020812562 | 1,013985948 | 1,083301446 | 0,364325492 | 0,866722529 | 0,999538068 | 0,865574697 | 0,393685 |
| Q811D0 | DLG1  | 0,978253762 | 1,020378366 | 1,005755243 | 0,995612629 | 1,028708017 | 0,985356062 | 0,983547833 | 0,891153867 | 0,989598248 | 0,975672805 | 0,39567  |
| O88741 | GDAP1 | 1,102405274 | 1,009018509 | 0,790468376 | 1,098107841 | 1,124974839 | 1,095175979 | 1,01021166  | 1,063724239 | 1,017507205 | 1,062318784 | 0,395746 |
| Q9WUB3 | PYGM  | 1,019723178 | 1,084937923 | 0,876337725 | 1,019001173 | 1,091348919 | 1,197243856 | 1,101732371 | 0,97240004  | 0,936000835 | 1,059745204 | 0,395782 |
| P63087 | PP1G  | 0,560178252 | 1,181637009 | 1,158374274 | 1,099810465 | 1,282381544 | 1,042834516 | 1,109976396 | 1,219285165 | 0,993008227 | 1,12949717  | 0,396202 |
| O35382 | EXOC4 | 0,901879622 | 1,00291381  | 1,094082546 | 1,001124022 | 1,11585368  | 0,735146672 | 0,906139991 | 0,888261911 | 0,996545235 | 0,928389498 | 0,396299 |
| P63325 | RS10  | 0,950218759 | 0,872330505 | 0,974600876 | 1,20284986  | 0,863283612 | 0,538194853 | 1,006356147 | 1,099072635 | 0,927996434 | 0,886980736 | 0,396556 |
| Q8BHK1 | NIPA1 | 1,15920576  | 1,129362187 | 0,753683519 | 0,957748534 | 0,921095238 | 1,138983106 | 1,011854428 | 0,725725237 | 0,55960986  | 0,871453574 | 0,397624 |
| P84091 | AP2M1 | 0,964289482 | 0,982766212 | 1,055865118 | 0,997079188 | 1,070819971 | 0,920134861 | 1,056272214 | 1,055764    | 1,061198688 | 1,032837947 | 0,398204 |

|        |       |             |             |             |             |             |             |             |             |             |             |          |
|--------|-------|-------------|-------------|-------------|-------------|-------------|-------------|-------------|-------------|-------------|-------------|----------|
| Q8BIZ1 | ANS1B | 0,804562676 | 0,821179486 | 1,190717658 | 1,183540179 | 1,008063143 | 0,597126937 | 0,8452651   | 0,903694379 | 1,056169331 | 0,882063778 | 0,399956 |
| Q9JIA1 | LGI1  | 0,980658489 | 0,991457238 | 1,018275486 | 1,009608787 | 0,914300633 | 0,925608543 | 0,96965913  | 0,994322232 | 1,059372094 | 0,972652526 | 0,400001 |
| P08553 | NFM   | 1,227034805 | 1,121318739 | 0,714927363 | 0,936719093 | 1,202836428 | 1,34878257  | 1,121775546 | 1,057795277 | 0,867554285 | 1,119748821 | 0,400406 |
| Q9CPX6 | ATG3  | 0,887921289 | 1,09332558  | 0,868418454 | 1,150334677 | 0,842233059 | 0,914358665 | 0,869111027 | 1,091182276 | 0,928415983 | 0,929060202 | 0,402991 |
| Q8BHN3 | GANAB | 1,000648088 | 0,965662898 | 0,997649836 | 1,036039177 | 1,055684705 | 0,923503576 | 0,979344918 | 0,939408951 | 0,973957243 | 0,974379879 | 0,403707 |
| P14873 | MAP1B | 0,963847285 | 1,04625172  | 1,003508628 | 0,986392366 | 1,05673529  | 1,050921174 | 1,000601365 | 0,974139409 | 1,020849114 | 1,02064927  | 0,404444 |
| P31938 | MP2K1 | 0,871970368 | 0,998982455 | 1,09003848  | 1,039008697 | 0,910225215 | 0,907674606 | 0,995729354 | 0,974830205 | 1,003027674 | 0,958297411 | 0,405721 |
| Q7M6Y3 | PICAL | 1,2440894   | 0,202607763 | 1,275143261 | 1,278159576 | 1,190623405 | 1,233026067 | 1,334387145 | 1,260923169 | 1,042249132 | 1,212241783 | 0,405755 |
| Q925N0 | SFXN5 | 1,209034187 | 1,009403054 | 0,70932318  | 1,072239579 | 0,841794152 | 1,295975595 | 0,836678482 | 0,780053589 | 0,462948655 | 0,843490095 | 0,405814 |
| Q9DCM0 | ETHE1 | 1,277999782 | 0,094192964 | 1,393728195 | 1,23407906  | 1,182094    | 1,325823301 | 1,443344859 | 1,156064054 | 1,110554846 | 1,243576212 | 0,406483 |
| Q8BWT5 | DIP2A | 0,889034408 | 1,115924684 | 0,976487178 | 1,01855373  | 1,374932169 | 1,018882213 | 0,897696018 | 1,250834483 | 0,950971608 | 1,098663298 | 0,407091 |
| O54829 | RGS7  | 0,910597453 | 1,062681801 | 1,053650371 | 0,973070376 | 1,105464547 | 0,960475216 | 0,925005432 | 0,992483509 | 0,116274934 | 0,819940728 | 0,408565 |
| Q9WTX6 | CUL1  | 0,918899614 | 1,1193245   | 0,950600347 | 1,011175539 | 0,938532824 | 0,368129427 | 1,055683035 | 0,997523465 | 0,98778616  | 0,869530983 | 0,409763 |
| Q99K10 | ACON  | 1,064243374 | 1,035349357 | 0,943787527 | 0,956619742 | 1,063609495 | 1,074430634 | 0,991709061 | 0,97101427  | 1,052225357 | 1,030597763 | 0,409865 |
| Q8CG76 | ARK72 | 0,946140014 | 0,952685795 | 1,045056636 | 1,056117555 | 1,014081115 | 1,250911176 | 1,080455928 | 0,944679889 | 0,9963949   | 1,057304601 | 0,410196 |
| Q99K85 | SERC  | 1,043591767 | 0,917086885 | 0,993462016 | 1,045859332 | 1,039629607 | 0,84570693  | 1,028565391 | 0,995192267 | 0,84521272  | 0,950861383 | 0,410426 |
| P00405 | COX2  | 1,214260202 | 0,893105274 | 0,94486939  | 0,947765134 | 1,059197925 | 0,972258294 | 1,05925291  | 0,79399868  | 0,587801217 | 0,894501805 | 0,412011 |
| Q91VD9 | NDUS1 | 1,079637467 | 1,010691972 | 0,971986718 | 0,937683844 | 0,960011042 | 0,997641287 | 0,956387789 | 0,954887438 | 1,003215381 | 0,974428588 | 0,412616 |
| O35668 | HAP1  | 0,44163701  | 1,285691161 | 1,034355817 | 1,238316012 | 0,904984472 | 1,052436018 | 1,370161271 | 1,292211089 | 1,230417553 | 1,170042081 | 0,413074 |
| Q8CHC4 | SYNJ1 | 0,931014479 | 1,079101805 | 0,977376868 | 1,012506848 | 1,060019758 | 0,912772133 | 0,903126283 | 0,965599611 | 0,977656316 | 0,96383482  | 0,417574 |
| Q9DCL9 | PUR6  | 1,075132686 | 1,050111759 | 0,923057454 | 0,951698101 | 1,000395529 | 0,919641882 | 0,979723645 | 1,028480862 | 0,878588844 | 0,961366152 | 0,418087 |
| Q99LF4 | RTCB  | 0,970154934 | 0,984756545 | 0,987895285 | 1,057193236 | 0,97531712  | 0,956915101 | 1,051867961 | 1,087229875 | 1,078842504 | 1,030034512 | 0,418717 |
| Q9QZX7 | SRR   | 0,927461597 | 0,960760365 | 1,120351624 | 0,991426413 | 0,953904356 | 0,817888997 | 0,926780184 | 0,057304319 | 1,257069051 | 0,802589381 | 0,418877 |
| P62812 | GBRA1 | 0,973955742 | 1,005896508 | 0,806036282 | 1,214111469 | 1,206683346 | 1,283347926 | 1,042042904 | 1,130833603 | 0,830709495 | 1,098723455 | 0,419352 |
| O35609 | SCAM3 | 0,885180716 | 1,147453286 | 0,992718134 | 0,974647864 | 0,950707796 | 0,939139697 | 0,952086889 | 0,867225599 | 1,044188815 | 0,950669759 | 0,41949  |
| Q3TEA8 | HP1B3 | 0,856950533 | 1,092042515 | 1,032351675 | 1,018655277 | 0,782673604 | 1,007468302 | 1,110697122 | 0,684737352 | 0,98903812  | 0,9149229   | 0,419652 |
| Q91ZU6 | DYST  | 0,769604111 | 1,032434691 | 1,131410475 | 1,066550723 | 1,048510576 | 0,816657053 | 0,964208817 | 0,924358518 | 0,893876824 | 0,929522357 | 0,41987  |
| P63328 | PP2BA | 1,003955611 | 1,001776484 | 0,984883177 | 1,009384728 | 1,058661218 | 0,871815783 | 1,01634002  | 1,1323052   | 1,179117708 | 1,051647986 | 0,420702 |
| Q9DC07 | LNEBL | 0,897073878 | 1,178507933 | 0,840481044 | 1,083937144 | 0,839927134 | 1,113612917 | 1,047053163 | 0,83723473  | 0,679463476 | 0,903458284 | 0,420851 |
| P31648 | SC6A1 | 0,877901096 | 1,054502743 | 1,058382123 | 1,009214038 | 0,973380627 | 1,043859259 | 1,002357139 | 0,747671513 | 0,937693468 | 0,940992401 | 0,421029 |
| Q91VN4 | MIC25 | 1,030642242 | 0,960878082 | 1,02942071  | 0,979058967 | 0,955146539 | 0,718387435 | 1,02813054  | 1,023963049 | 0,988232506 | 0,942772014 | 0,422523 |
| Q8R570 | SNP47 | 1,011776903 | 1,107209426 | 0,920501744 | 0,960511928 | 1,130026985 | 0,978273959 | 1,056836405 | 0,994156769 | 1,0389771   | 1,039654244 | 0,42316  |
| P12815 | PDCD6 | 1,106524636 | 1,196171438 | 1,566418226 | 0,1308857   | 1,009038107 | 1,24769978  | 1,275411804 | 1,284191828 | 1,36167748  | 1,2356038   | 0,423851 |
| P63040 | CPLX1 | 0,829106302 | 0,898420676 | 1,082028761 | 1,19044426  | 0,904810358 | 1,435634374 | 1,222285953 | 1,119531075 | 0,896169349 | 1,115686222 | 0,424036 |
| P46061 | RAGP1 | 1,07355212  | 0,996501897 | 0,961208672 | 0,968737311 | 1,040416417 | 1,300914696 | 0,855911297 | 1,068196302 | 1,088567469 | 1,070801236 | 0,424163 |
| P20357 | MTAP2 | 0,794966049 | 0,993932938 | 1,199883511 | 1,011217502 | 1,028905188 | 0,848329134 | 0,919650427 | 0,858823811 | 0,991804076 | 0,929502527 | 0,424669 |
| Q80TT2 | BAIP3 | 0,905235562 | 1,057072193 | 0,996560897 | 1,041131348 | 0,852527457 | 1,056426615 | 0,948696186 | 0,87509422  | 1,033764842 | 0,953301864 | 0,425277 |
| Q8BPN8 | DMXL2 | 0,965266686 | 0,923402503 | 1,075282132 | 1,036048679 | 1,077190399 | 0,836183612 | 0,714936297 | 0,979400929 | 1,043742802 | 0,930290808 | 0,426612 |
| Q99JY8 | PLPP3 | 0,946659267 | 1,012026863 | 1,068015185 | 0,973298685 | 0,957374129 | 1,146977488 | 0,870865063 | 0,878254284 | 0,875887291 | 0,945871651 | 0,426637 |
| Q9JIF0 | ANM1  | 0,617526514 | 1,174066388 | 0,896687396 | 1,311719702 | 0,085532351 | 0,685920645 | 1,043474896 | 1,239809908 | 0,84611481  | 0,780170522 | 0,427712 |

|        |       |             |             |             |             |             |             |             |             |             |             |          |
|--------|-------|-------------|-------------|-------------|-------------|-------------|-------------|-------------|-------------|-------------|-------------|----------|
| Q9CWZ7 | SNAG  | 0,94839324  | 1,002510429 | 0,994083101 | 1,05501323  | 1,019339682 | 0,949924728 | 1,034942126 | 0,936058488 | 0,925884798 | 0,973229965 | 0,429123 |
| Q62189 | SNRPA | 1,172023823 | 0,878344748 | 0,980962712 | 0,968668717 | 1,143794366 | 1,02925353  | 0,910742376 | 0,747356198 | 0,722541972 | 0,910737688 | 0,429354 |
| P57759 | ERP29 | 0,9330338   | 0,980440952 | 1,050366501 | 1,036158747 | 0,955233103 | 0,83228708  | 1,054429882 | 0,989447449 | 0,970179047 | 0,960315312 | 0,430005 |
| P61982 | 1433G | 0,980444395 | 1,035656917 | 0,991379962 | 0,992518727 | 0,915949618 | 1,069389834 | 1,015131791 | 0,939391439 | 0,902502786 | 0,968473094 | 0,430557 |
| P28661 | SEPT4 | 1,468807623 | 1,234016688 | 1,161479108 | 0,135696581 | 1,565265249 | 1,063653734 | 1,225271915 | 1,029242264 | 1,291879131 | 1,235062458 | 0,431108 |
| Q9DCD0 | 6PGD  | 0,935229995 | 1,029563658 | 1,000532516 | 1,034673831 | 1,005299217 | 0,88491069  | 1,121725448 | 1,202313845 | 1,051715088 | 1,053192858 | 0,433688 |
| P56395 | CYB5  | 0,058671264 | 1,247743636 | 1,339532573 | 1,354052526 | 0,922286788 | 1,455322557 | 1,395943166 | 1,117203281 | 1,345486618 | 1,247248482 | 0,434771 |
| O70325 | GPX41 | 1,06842681  | 1,01067571  | 0,905943082 | 1,014954398 | 0,919786346 | 0,980448876 | 1,122715235 | 0,929173643 | 0,723258792 | 0,935076578 | 0,436431 |
| Q9Z0H8 | CLIP2 | 0,989693156 | 0,915945263 | 1,084050597 | 1,010310984 | 1,029384705 | 1,091686878 | 1,038123097 | 0,198703998 | 0,859102795 | 0,843400295 | 0,438097 |
| Q9JKR6 | HYOU1 | 0,856132398 | 0,974256444 | 0,993319692 | 1,176291466 | 0,941144735 | 0,677668308 | 0,951658454 | 0,983640234 | 1,061549026 | 0,923132151 | 0,439244 |
| Q9Z2D6 | MECP2 | 1,049617657 | 1,087836555 | 1,003652548 | 0,858893241 | 1,036405693 | 1,079165121 | 1,147718004 | 0,992428095 | 0,975421966 | 1,046227776 | 0,439475 |
| Q9QXY6 | EHD3  | 0,684917622 | 1,193345533 | 1,11323033  | 1,008506515 | 1,179618911 | 0,940509227 | 1,09062173  | 1,103393969 | 1,12686797  | 1,088202361 | 0,441028 |
| Q80UG2 | PLXA4 | 0,604943019 | 1,121198357 | 1,217661386 | 1,056197238 | 1,004074967 | 0,894732589 | 1,044818966 | 1,009249542 | 0,024378557 | 0,795450924 | 0,441303 |
| P54775 | PRS6B | 0,967697023 | 0,964779498 | 1,075999807 | 0,991523672 | 0,951013854 | 0,850345645 | 1,05875245  | 0,95054657  | 1,004843278 | 0,963100359 | 0,442965 |
| Q923T9 | KCC2G | 1,14640322  | 1,000124388 | 0,906555981 | 0,946916411 | 0,963611681 | 0,996288234 | 0,990629227 | 0,962894293 | 0,873857143 | 0,957456116 | 0,443249 |
| Q6R891 | NEB2  | 1,030415724 | 0,961750932 | 1,065770979 | 0,942062365 | 0,975669451 | 0,861012428 | 0,985957271 | 0,8688708   | 1,088664616 | 0,956034913 | 0,443364 |
| P10922 | H10   | 0,80210862  | 1,106460485 | 0,967803592 | 1,123627303 | 0,83124242  | 1,007889024 | 1,197261654 | 1,30609456  | 1,117253623 | 1,091948256 | 0,443498 |
| Q9EPN1 | NBEA  | 0,968917742 | 1,565154203 | 1,412469943 | 0,053458112 | 1,544156169 | 0,456308112 | 1,389036757 | 1,350459062 | 1,887322141 | 1,325456448 | 0,444489 |
| P62897 | CYC   | 0,877324552 | 1,044403787 | 1,036806913 | 1,041464747 | 0,975168169 | 1,067007498 | 1,111758897 | 1,032112417 | 0,996853047 | 1,036580006 | 0,446766 |
| G5E8K5 | ANK3  | 1,080361005 | 1,00092867  | 0,952921028 | 0,965789297 | 1,086010343 | 1,01765282  | 1,011722933 | 0,966727966 | 1,055153043 | 1,027453421 | 0,447064 |
| P61294 | RAB6B | 0,968753323 | 0,947263037 | 1,111306475 | 0,972677165 | 0,983799339 | 1,298581564 | 1,278642197 | 1,03388706  | 0,832924838 | 1,085567    | 0,448095 |
| Q9Z2Q6 | SEPT5 | 1,081727385 | 0,922204093 | 1,028102556 | 0,967965966 | 1,076057261 | 0,917474826 | 0,959952338 | 0,934554574 | 0,9326217   | 0,96413214  | 0,449082 |
| P62331 | ARF6  | 0,844372385 | 1,0489848   | 1,139349094 | 0,967293721 | 0,951088654 | 0,688803445 | 1,070303665 | 1,03281183  | 0,879602478 | 0,924522014 | 0,449856 |
| Q8BL97 | SRSF7 | 0,824945193 | 1,017650167 | 1,065073351 | 1,09233129  | 0,931735996 | 0,902305291 | 0,967050902 | 0,919245654 | 1,041162685 | 0,952300106 | 0,45212  |
| Q9JL62 | GLTP  | 1,096174902 | 1,223768594 | 0,78630709  | 0,893749415 | 0,988091916 | 0,994170369 | 1,019574902 | 0,883296419 | 0,657012433 | 0,908429208 | 0,452501 |
| Q8C163 | EXOG  | 0,966824945 | 0,921513786 | 1,024870701 | 1,086790567 | 1,024765884 | 0,995470377 | 1,036491547 | 1,284597108 | 0,950438758 | 1,058352735 | 0,452717 |
| P21460 | CYTC  | 0,940794866 | 0,831942398 | 1,171145391 | 1,056117345 | 1,005704539 | 1,280606776 | 1,092306703 | 0,990385851 | 0,988455391 | 1,071491852 | 0,453335 |
| Q9CQW1 | YKT6  | 1,035237679 | 0,941505612 | 1,02880791  | 0,994448799 | 1,071222015 | 1,040357818 | 0,992294285 | 0,697468583 | 0,884729128 | 0,937214366 | 0,453534 |
| Q62446 | FKBP3 | 1,070841145 | 1,022091591 | 0,941995047 | 0,965072216 | 1,296148686 | 0,99662267  | 1,183276874 | 1,041140968 | 0,84543711  | 1,072525262 | 0,454754 |
| P62806 | H4    | 0,825339081 | 1,094331158 | 1,060021839 | 1,020307923 | 0,845268276 | 0,918764757 | 1,065518357 | 0,946270323 | 0,96202261  | 0,947568865 | 0,456454 |
| P60122 | RUVB1 | 0,924766321 | 1,022554896 | 1,075945847 | 0,976732936 | 0,827161343 | 0,839015948 | 1,090511374 | 0,928338478 | 1,050456591 | 0,947096747 | 0,456651 |
| Q9Z1Z0 | USO1  | 0,861445524 | 1,139879894 | 1,003933838 | 0,994740744 | 1,113004481 | 1,053313238 | 0,918500147 | 1,124002827 | 1,04680067  | 1,051124272 | 0,456821 |
| Q99K46 | UBP11 | 0,834483564 | 1,03609453  | 1,160102333 | 0,969319573 | 0,98654608  | 1,020450914 | 0,957496734 | 1,115729177 | 1,257417446 | 1,06752807  | 0,457112 |
| Q80T41 | GABR2 | 1,074743443 | 1,016743233 | 0,989628279 | 0,918885044 | 1,105578668 | 1,097695869 | 0,876712137 | 0,780454625 | 0,805866479 | 0,933261555 | 0,45748  |
| P97390 | VPS45 | 0,896178326 | 1,157858739 | 0,936143434 | 1,009819501 | 0,96576432  | 0,951229613 | 0,813418904 | 0,871244474 | 1,103137567 | 0,940958975 | 0,458261 |
| Q9CZ42 | NNRD  | 0,67177006  | 1,002624165 | 1,196044421 | 1,129561353 | 1,126895725 | 1,016433335 | 1,07899754  | 1,094019979 | 1,093238172 | 1,08191695  | 0,458401 |
| P61750 | ARF4  | 0,986683005 | 1,193513372 | 1,260130038 | 0,559673586 | 0,92368901  | 1,173543869 | 1,295588978 | 1,082934289 | 1,130847436 | 1,121320716 | 0,458975 |
| Q8VHH5 | AGAP3 | 0,932697698 | 0,970738051 | 1,057268634 | 1,039295618 | 1,041233202 | 0,912041792 | 0,972656519 | 0,99757227  | 0,933627048 | 0,971426166 | 0,459371 |
| P63001 | RAC1  | 0,87466205  | 0,842465179 | 1,204856787 | 1,078015984 | 0,856357179 | 1,239583411 | 1,064970976 | 1,021788732 | 1,259738785 | 1,088487817 | 0,460325 |
| P53986 | MOT1  | 1,067869833 | 1,071140187 | 0,921376348 | 0,939613633 | 1,097616108 | 1,154825284 | 1,108990458 | 0,883631954 | 1,008052103 | 1,050623181 | 0,461417 |



|        |       |             |             |             |             |             |             |             |             |             |             |          |
|--------|-------|-------------|-------------|-------------|-------------|-------------|-------------|-------------|-------------|-------------|-------------|----------|
| Q8BJY1 | PSMD5 | 0,916317407 | 1,083817718 | 1,016492018 | 0,983372857 | 0,960142848 | 0,972527442 | 1,042664516 | 1,021257313 | 0,728390024 | 0,944996429 | 0,462287 |
| P47708 | RP3A  | 1,113039713 | 1,016989567 | 0,921976637 | 0,947994082 | 1,267803596 | 1,140867544 | 1,018098263 | 0,924738647 | 0,961183583 | 1,062538327 | 0,463864 |
| Q61024 | ASNS  | 1,055077753 | 0,700472994 | 1,063686685 | 1,180762568 | 1,04235265  | 0,865308862 | 1,203681077 | 1,218431911 | 1,12259528  | 1,090473956 | 0,464438 |
| Q925I1 | ATAD3 | 1,303283101 | 1,41518535  | 1,217361793 | 0,064169756 | 1,170135391 | 1,255366171 | 1,270945325 | 1,109383708 | 1,27119688  | 1,215405495 | 0,464915 |
| Q9Z0P5 | TWF2  | 0,937586033 | 1,047897631 | 1,000107139 | 1,014409197 | 0,146620306 | 1,118570396 | 0,953068396 | 0,959093397 | 1,045287229 | 0,844527945 | 0,466353 |
| Q63844 | MK03  | 1,074124634 | 1,216374536 | 0,54671285  | 1,16278798  | 1,181573844 | 1,001498293 | 1,105174058 | 1,150986096 | 1,097313976 | 1,107309253 | 0,467112 |
| P97823 | LYPA1 | 1,04692189  | 1,135292015 | 0,970784022 | 0,847002072 | 0,941426784 | 1,127639826 | 0,998366945 | 0,785040723 | 0,801827261 | 0,930860308 | 0,467598 |
| B9EKR1 | PRPTZ | 0,916073434 | 1,032333186 | 1,011399604 | 1,040193776 | 1,03890943  | 1,004153726 | 0,982336683 | 0,884123123 | 0,939193382 | 0,969743269 | 0,468319 |
| P61358 | RL27  | 0,703322263 | 0,969226966 | 1,272269013 | 1,055181757 | 0,745092723 | 0,758467704 | 1,201420491 | 0,813583836 | 0,940861161 | 0,891885183 | 0,468677 |
| Q9CZ44 | NSF1C | 0,930920462 | 1,015290716 | 1,018184079 | 1,035604743 | 1,053875439 | 0,975612427 | 0,931516545 | 0,948700373 | 0,969694299 | 0,975879817 | 0,468837 |
| Q64105 | SPRE  | 0,945903551 | 1,047848611 | 0,993011322 | 1,013236516 | 1,031957637 | 1,090633993 | 1,03435564  | 1,004829863 | 0,956627113 | 1,023680849 | 0,469999 |
| Q8BFZ3 | ACTBL | 0,921184469 | 0,94523602  | 0,991588805 | 1,141990706 | 0,895111004 | 0,811896186 | 0,977819566 | 3,002088778 | 1,104196233 | 1,358222353 | 0,471947 |
| Q99MN9 | PCCB  | 0,05372232  | 1,163445312 | 1,437953651 | 1,344878717 | 1,266440368 | 1,131089104 | 1,264681411 | 1,202335278 | 1,206181201 | 1,214145472 | 0,473832 |
| Q8CAA7 | PGM2L | 0,907616154 | 1,066745264 | 1,024094702 | 1,00154388  | 1,060786931 | 0,935288656 | 1,00535658  | 0,90631979  | 0,925699004 | 0,966690192 | 0,474558 |
| Q8CGC7 | SYEP  | 0,915219391 | 1,067769552 | 0,960014814 | 1,056996243 | 0,923306387 | 0,98549422  | 0,845302591 | 0,99452319  | 1,055206734 | 0,960766624 | 0,47502  |
| Q8BNW9 | KBTBB | 1,070763524 | 1,074156813 | 0,764988482 | 1,090091181 | 0,735030061 | 0,769511272 | 0,898890635 | 0,891399047 | 1,241802963 | 0,907326796 | 0,475208 |
| Q60668 | HNRPD | 0,90713617  | 0,942538978 | 0,957519652 | 1,1928052   | 0,993241246 | 0,836408516 | 1,14705394  | 1,208101396 | 1,184024093 | 1,073765838 | 0,476033 |
| B2RSH2 | GNAI1 | 0,947042808 | 0,980596726 | 1,083612811 | 0,988747654 | 1,06744941  | 0,983705362 | 1,044912285 | 1,027424971 | 0,993565864 | 1,023411578 | 0,478068 |
| Q8CAQ8 | MIC60 | 1,011172817 | 1,021885165 | 1,027395788 | 0,93954623  | 0,970479941 | 1,041124442 | 1,032774193 | 0,976671245 | 1,099763974 | 1,024162759 | 0,478721 |
| Q9R111 | GUAD  | 0,88479197  | 0,871841566 | 1,280358247 | 0,963008218 | 0,844026444 | 0,754382732 | 0,925285865 | 0,987962475 | 1,091413792 | 0,920614262 | 0,480852 |
| Q9JKD3 | SCAM5 | 1,206384353 | 0,813714634 | 0,983157251 | 0,996743762 | 0,707544131 | 1,201958072 | 0,749896516 | 0,646017788 | 1,141367158 | 0,889356733 | 0,485054 |
| O88447 | KLC1  | 1,007393727 | 1,017137083 | 0,898070015 | 1,077399175 | 1,033105078 | 0,94391564  | 0,988769563 | 0,980459191 | 0,90191015  | 0,969631924 | 0,485702 |
| P33173 | KIF1A | 0,85959774  | 1,09399111  | 1,064009989 | 0,982401161 | 1,092899129 | 0,973980958 | 0,950515448 | 0,883575647 | 0,857918701 | 0,951777976 | 0,485811 |
| P47915 | RL29  | 0,992761123 | 1,061697117 | 0,842635023 | 1,102906737 | 1,139336062 | 1,150572728 | 1,097295314 | 1,009241016 | 0,881864677 | 1,055661959 | 0,48647  |
| P53810 | PIPNA | 0,915721609 | 0,999805043 | 0,918196018 | 1,16627733  | 1,066535514 | 0,876764556 | 0,999807047 | 0,972673218 | 0,821008693 | 0,947357806 | 0,486728 |
| Q8BVQ5 | PPME1 | 0,996951429 | 0,975962831 | 1,008158259 | 1,018927481 | 1,045967027 | 0,827362232 | 0,946751434 | 1,029077101 | 0,98604804  | 0,967041167 | 0,486857 |
| Q5FWK3 | RHG01 | 1,180004769 | 0,961140736 | 0,898112552 | 0,960741942 | 1,044928986 | 0,987496143 | 1,015629868 | 1,138149576 | 1,036309651 | 1,044502845 | 0,492478 |
| O08795 | GLU2B | 0,972086    | 1,054592163 | 0,947728167 | 1,02559367  | 0,882199698 | 1,264678695 | 1,110239827 | 0,95659139  | 1,066868028 | 1,056115528 | 0,493423 |
| P46660 | AINX  | 1,261884258 | 1,101375408 | 0,774394134 | 0,8623462   | 1,192534654 | 1,150319355 | 1,068489696 | 1,069563399 | 0,919938749 | 1,080169171 | 0,494121 |
| P20060 | HEXB  | 1,002640499 | 0,980191351 | 1,015924272 | 1,001243877 | 0,99646824  | 1,050146858 | 0,958002254 | 0,989962518 | 0,905805916 | 0,980077157 | 0,495274 |
| P06837 | NEUM  | 0,977090538 | 1,145462921 | 0,896026567 | 0,981419974 | 1,00039098  | 1,0249883   | 1,058178506 | 0,980540142 | 1,133674772 | 1,03955454  | 0,4963   |
| P23819 | GRIA2 | 0,981488141 | 0,326077666 | 1,335528697 | 1,356905496 | 1,091570213 | 1,007347997 | 1,11083141  | 1,18366244  | 1,414520425 | 1,161586497 | 0,496635 |
| P61089 | UBE2N | 0,888019043 | 1,069762721 | 1,023248926 | 1,01896931  | 0,94773239  | 1,032039759 | 1,026747381 | 0,900402993 | 0,929988983 | 0,967382301 | 0,497175 |
| Q81110 | ATPF1 | 1,047879895 | 0,893574668 | 0,987220892 | 1,071324545 | 1,110564374 | 0,097289477 | 1,084246862 | 1,049806707 | 0,873355108 | 0,843052506 | 0,497455 |
| Q9CR51 | VATG1 | 0,806063293 | 1,095019842 | 1,091237272 | 1,007679593 | 0,792387101 | 1,027662289 | 1,088759094 | 0,892745563 | 0,896959067 | 0,939702623 | 0,497911 |
| Q60634 | FLOT2 | 0,928857719 | 0,98998039  | 0,989714185 | 1,091447706 | 1,074554591 | 0,961307259 | 0,950610575 | 1,073438889 | 1,108686014 | 1,033719466 | 0,49805  |
| P30275 | KCRU  | 1,025389726 | 0,998678166 | 0,947411661 | 1,028520447 | 1,076718589 | 0,927336788 | 1,060959259 | 1,083380118 | 0,987476504 | 1,027174252 | 0,49826  |
| P35700 | PRDX1 | 1,002691725 | 0,999995511 | 0,974539666 | 1,022773099 | 1,002417008 | 1,103590608 | 1,137866413 | 1,058982398 | 0,881407866 | 1,036852858 | 0,499481 |
| Q9CQA3 | SDHB  | 1,054577474 | 0,971930929 | 0,948509918 | 1,024981679 | 0,950626843 | 1,0430852   | 1,022545195 | 0,970352263 | 0,868350968 | 0,970992094 | 0,499719 |
| Q91WK2 | EIF3H | 1,010556998 | 0,98572426  | 1,004471217 | 0,999247525 | 0,863684268 | 0,141060517 | 1,129815233 | 1,112372238 | 1,011309233 | 0,851648298 | 0,499788 |

|        |       |             |             |             |             |             |             |             |             |             |             |          |
|--------|-------|-------------|-------------|-------------|-------------|-------------|-------------|-------------|-------------|-------------|-------------|----------|
| Q9D1A2 | CNDP2 | 0,987741393 | 1,010816258 | 1,029603989 | 0,97183836  | 1,026060452 | 0,963713458 | 1,048043812 | 1,063603473 | 0,984258383 | 1,017135916 | 0,500772 |
| Q9CT10 | RANB3 | 1,242878397 | 0,824490665 | 0,9770795   | 0,955551437 | 1,105758946 | 0,566969089 | 1,038087538 | 0,966155477 | 0,85499842  | 0,906393894 | 0,50099  |
| Q9CRB6 | TPPP3 | 0,926633767 | 1,128021008 | 0,920937224 | 1,024408    | 1,083112711 | 1,129528392 | 1,061987187 | 1,099001706 | 0,867371524 | 1,048200304 | 0,501328 |
| Q6PDM2 | SRSF1 | 0,926141726 | 1,02433385  | 1,01836552  | 1,031158904 | 0,986472489 | 0,945492197 | 1,077153662 | 0,957911271 | 0,885178603 | 0,970441645 | 0,501343 |
| Q8CGK3 | LONM  | 0,945346177 | 1,050730702 | 1,011151306 | 0,992771816 | 0,9959316   | 0,876193696 | 0,977423086 | 0,996313248 | 1,029192919 | 0,97501091  | 0,501368 |
| P61979 | HNRPK | 0,87051611  | 1,045180002 | 1,045739648 | 1,03856424  | 0,96841967  | 0,852989936 | 1,029211029 | 0,968149959 | 1,001001949 | 0,963954508 | 0,502079 |
| P14231 | AT1B2 | 1,06931812  | 0,976875954 | 0,935021082 | 1,018784844 | 0,891368501 | 1,005412835 | 1,036686715 | 1,027077906 | 0,873200816 | 0,966749355 | 0,502219 |
| P53994 | RAB2A | 0,866673413 | 1,020439964 | 1,130501908 | 0,982384715 | 0,84400211  | 0,941510362 | 0,964553739 | 1,071007269 | 0,957464756 | 0,955707647 | 0,504224 |
| Q8BHZ0 | FA49A | 0,884403327 | 0,888373885 | 1,218572108 | 1,00865068  | 1,038843129 | 0,885158788 | 0,772061427 | 0,977699608 | 1,01528663  | 0,937809916 | 0,504727 |
| Q64010 | CRK   | 0,096462626 | 1,883284544 | 1,763835485 | 0,256417345 | 1,82130204  | 1,463180546 | 1,591861252 | 1,958385115 | 0,129031528 | 1,392752096 | 0,505725 |
| Q8CBY8 | DCTN4 | 0,954716592 | 1,087074543 | 1,00310781  | 0,955101055 | 1,157740762 | 1,04450874  | 0,242669424 | 0,911310458 | 0,993535703 | 0,869953017 | 0,50595  |
| Q8BKX1 | BAIP2 | 0,881695483 | 0,913692609 | 1,25587696  | 0,948734948 | 1,007566417 | 0,884304788 | 1,032888059 | 1,16685282  | 1,293673746 | 1,077057166 | 0,506478 |
| P31650 | S6A11 | 1,081480138 | 1,079483249 | 0,799733059 | 1,039303554 | 1,040907646 | 1,40624423  | 1,138530488 | 0,94248082  | 0,88820733  | 1,083274103 | 0,507908 |
| Q9Z1G3 | VATC1 | 1,042237262 | 1,017586314 | 0,886220058 | 1,053956366 | 1,189561788 | 0,948138981 | 1,182501448 | 1,096827055 | 0,864766082 | 1,056359071 | 0,508193 |
| P80315 | TCPD  | 1,040400593 | 1,058497909 | 1,059850399 | 0,841251099 | 1,030328824 | 1,006660295 | 1,092486719 | 0,986979616 | 1,06204469  | 1,035700029 | 0,509249 |
| O08917 | FLOT1 | 1,05537345  | 0,998155281 | 0,922651906 | 1,023819363 | 1,01916876  | 0,780001768 | 1,030911733 | 0,983466735 | 0,986201171 | 0,959950033 | 0,509974 |
| E9Q3L2 | PI4KA | 1,316302239 | 0,308302831 | 1,190659342 | 1,184735588 | 1,120644256 | 1,176041563 | 1,225397395 | 1,040606824 | 1,153832188 | 1,143304445 | 0,511491 |
| Q7TN79 | AKA7G | 0,962312604 | 1,223434023 | 1,057438762 | 0,756814611 | 0,873433379 | 1,016100714 | 1,036969928 | 0,775944755 | 0,947572873 | 0,93000433  | 0,51216  |
| P56135 | ATPK  | 0,863102591 | 0,962744466 | 1,24674651  | 0,927406433 | 0,789663204 | 0,93315848  | 1,028127435 | 0,959218468 | 0,987563207 | 0,939546159 | 0,512275 |
| P84096 | RHOG  | 1,103224346 | 0,960546846 | 0,937443105 | 0,998785703 | 1,01761519  | 1,083052453 | 1,226126695 | 0,999311005 | 0,907693804 | 1,046759829 | 0,51417  |
| Q9D3D9 | ATPD  | 1,005685919 | 0,991786995 | 0,987794959 | 1,014732126 | 0,827536844 | 1,07058786  | 1,14672399  | 0,855044761 | 0,840744388 | 0,948127569 | 0,516374 |
| P55012 | S12A2 | 1,093378835 | 1,035959243 | 0,802403801 | 1,068258121 | 0,892403044 | 0,916956578 | 1,169441145 | 0,841759644 | 0,877367359 | 0,939585554 | 0,518259 |
| Q3ULJ0 | GPD1L | 0,927406476 | 0,998556248 | 1,061348769 | 1,012688507 | 1,06950131  | 0,919222613 | 1,119698411 | 1,029984075 | 1,014138114 | 1,030508905 | 0,518431 |
| Q9WVK4 | EHD1  | 0,540529332 | 1,115858526 | 1,195973494 | 1,147638648 | 0,904132373 | 1,132110859 | 1,204065214 | 1,234237436 | 1,03825178  | 1,102559533 | 0,520014 |
| Q8JZN5 | ACAD9 | 1,073155243 | 1,032991034 | 0,906934351 | 0,986919373 | 1,098792993 | 0,938374995 | 0,947324003 | 0,809610541 | 0,997436774 | 0,958307861 | 0,520737 |
| Q91VF2 | HNMT  | 1,172169677 | 0,999661949 | 0,918010698 | 0,910157675 | 1,037808107 | 1,059831838 | 1,031188449 | 0,813142062 | 0,751181616 | 0,938630414 | 0,521073 |
| P43274 | H14   | 0,933605057 | 1,051960484 | 0,998874068 | 1,015560391 | 0,85571212  | 0,841214146 | 1,083057021 | 0,939149304 | 1,071585157 | 0,95814355  | 0,523137 |
| Q9JHR7 | IDE   | 1,368478118 | 1,042583978 | 0,574232945 | 1,014704959 | 0,593028313 | 0,740889016 | 0,959444821 | 0,776587946 | 1,274920295 | 0,868974078 | 0,52374  |
| P20444 | KPCA  | 0,638690233 | 1,135190116 | 1,058557788 | 1,167561862 | 0,800531854 | 0,660493639 | 0,996908226 | 0,882070357 | 1,170979804 | 0,902196776 | 0,523871 |
| Q3TXX4 | VGLU1 | 1,001868987 | 0,908089931 | 1,089175217 | 1,000865866 | 1,125090514 | 0,976069747 | 0,87557927  | 0,81849463  | 0,978034958 | 0,954653824 | 0,524322 |
| Q8BLJ3 | PLCX3 | 0,670213681 | 1,02404525  | 1,172091327 | 1,133649742 | 0,891871034 | 0,878203108 | 1,062871897 | 0,929191636 | 0,876818066 | 0,927791148 | 0,525145 |
| Q61151 | 2A5E  | 1,04515733  | 0,843933967 | 0,895233256 | 1,215675448 | 1,027349265 | 1,203758636 | 0,949254362 | 1,200722715 | 0,946518877 | 1,065520771 | 0,526553 |
| O88544 | CSN4  | 0,940434809 | 1,099872136 | 0,958009973 | 1,001683082 | 0,837385521 | 0,962023227 | 0,97544695  | 1,034741063 | 1,022500874 | 0,966419527 | 0,528282 |
| Q9ET22 | DPP2  | 0,994974924 | 1,115586592 | 0,78881827  | 1,100620213 | 0,966245043 | 1,011799157 | 0,865230007 | 0,902268982 | 1,00935331  | 0,9509793   | 0,528866 |
| P51855 | GSHB  | 1,088524782 | 0,891832998 | 0,947843528 | 1,071798691 | 0,78575153  | 0,990237938 | 1,046732302 | 1,059897929 | 0,875572628 | 0,951638465 | 0,529039 |
| Q61792 | LASP1 | 1,092324126 | 0,998382576 | 0,839182599 | 1,070110699 | 1,070756843 | 1,044289604 | 1,010275645 | 0,883600224 | 0,665904133 | 0,93496529  | 0,529516 |
| Q9CQF9 | PCYOX | 0,949056886 | 1,029490431 | 0,870897252 | 1,150555431 | 0,998963334 | 1,027502699 | 0,970627562 | 1,033872175 | 1,197174682 | 1,045628091 | 0,529524 |
| Q9WUM4 | COR1C | 0,963090321 | 1,067020644 | 1,009930751 | 0,959958284 | 0,999215929 | 0,955414694 | 1,047730649 | 1,06145252  | 1,038648535 | 1,020492465 | 0,53032  |
| O70172 | PI42A | 0,857789083 | 1,227331125 | 0,919536535 | 0,995343257 | 1,069136805 | 0,77370884  | 1,08937813  | 1,334400251 | 1,144105514 | 1,082145908 | 0,530572 |
| Q61187 | TS101 | 0,988408457 | 1,165322317 | 0,927358038 | 0,918911188 | 0,951117705 | 0,923139352 | 0,914239186 | 1,022541986 | 1,004549709 | 0,963117588 | 0,530854 |

|        |       |             |             |             |             |             |             |             |             |             |             |          |
|--------|-------|-------------|-------------|-------------|-------------|-------------|-------------|-------------|-------------|-------------|-------------|----------|
| Q9CZW5 | TOM70 | 1,029155304 | 0,975091074 | 1,040679025 | 0,955074598 | 1,000906615 | 0,934087874 | 0,991279993 | 1,069063877 | 1,162847511 | 1,031637174 | 0,530955 |
| P26443 | DHE3  | 0,994594003 | 1,032333184 | 0,959227388 | 1,013845425 | 1,033452297 | 0,882475423 | 1,140417276 | 1,129968457 | 0,996321572 | 1,036527005 | 0,531053 |
| Q3THW5 | H2AV  | 0,917679139 | 0,994513328 | 1,087280417 | 1,000527116 | 0,991783243 | 1,053995881 | 1,181814943 | 0,936060116 | 1,019709669 | 1,03667277  | 0,531151 |
| O35685 | NUDC  | 1,056232513 | 1,044280247 | 0,959414728 | 0,940072512 | 1,045977559 | 1,153762055 | 1,132738661 | 0,976469853 | 0,8918462   | 1,040158866 | 0,531513 |
| Q8BI08 | MAL2  | 1,075107339 | 0,938962396 | 1,044769601 | 0,941160664 | 1,050550462 | 0,989750627 | 0,925085709 | 0,944177895 | 0,960484972 | 0,974009933 | 0,532694 |
| Q9D154 | ILEUA | 1,156920909 | 1,057010762 | 0,851444387 | 0,934623942 | 1,213013558 | 1,091102892 | 1,042506005 | 1,039556746 | 0,88715431  | 1,054666702 | 0,534672 |
| Q6PB66 | LPPRC | 1,053054887 | 1,095813195 | 0,805643083 | 1,045488836 | 1,174557765 | 1,094966849 | 1,063709942 | 0,943583024 | 0,967538939 | 1,048871304 | 0,535859 |
| Q80VP1 | EPN1  | 0,923142904 | 0,989566441 | 1,018305116 | 1,06898554  | 1,002833975 | 0,865687302 | 0,985244972 | 1,184077739 | 1,220635151 | 1,051695828 | 0,536801 |
| Q9R1T4 | SEPT6 | 1,119298678 | 0,910921686 | 0,95548553  | 1,014294105 | 1,140635459 | 1,059300416 | 1,004744931 | 0,995134994 | 0,970207177 | 1,034004595 | 0,537485 |
| Q9CYT6 | CAP2  | 0,995677698 | 1,006395593 | 1,013903671 | 0,984023039 | 1,0432468   | 0,889230991 | 0,961168273 | 0,996708272 | 1,011318455 | 0,980334558 | 0,538131 |
| P53026 | RL10A | 0,927287649 | 0,937013332 | 1,032005815 | 1,103693204 | 1,028830673 | 1,200462723 | 1,165102446 | 0,910268295 | 0,939716888 | 1,048876205 | 0,538876 |
| Q8K183 | PDXX  | 0,895691395 | 1,05465241  | 1,00128006  | 1,048376135 | 0,864311503 | 0,973046555 | 1,044348854 | 0,963502984 | 1,003711531 | 0,969784286 | 0,539235 |
| Q03517 | SCG2  | 1,179857737 | 1,430227733 | 0,071358612 | 1,318555918 | 0,918867702 | 1,075377091 | 1,28212335  | 1,286727088 | 1,375932072 | 1,187805461 | 0,539711 |
| Q91VZ6 | SMAP1 | 0,996609651 | 1,008200439 | 0,998033863 | 0,997156047 | 1,050818376 | 0,953903611 | 0,952614791 | 0,93507327  | 1,024454442 | 0,983372898 | 0,542084 |
| Q5DTL9 | S4A10 | 0,977757755 | 0,977658203 | 1,044513616 | 1,000070426 | 1,043704853 | 0,823612474 | 0,95023663  | 0,837217826 | 1,128144442 | 0,956583245 | 0,543584 |
| P61264 | STX1B | 1,103886367 | 0,931360728 | 0,88557484  | 1,079178065 | 1,060069406 | 1,039352862 | 1,034654562 | 1,102940204 | 0,940497219 | 1,035502851 | 0,547348 |
| Q3UNZ8 | QORL2 | 1,231139056 | 1,1928746   | 0,33874941  | 1,237236934 | 1,144965558 | 1,273490387 | 0,999500952 | 1,088754759 | 1,124752937 | 1,126292919 | 0,548245 |
| P35762 | CD81  | 0,827663794 | 0,820439223 | 1,148340833 | 1,203556149 | 0,127760428 | 1,228629875 | 0,899984749 | 0,82538057  | 1,167166752 | 0,849784475 | 0,550818 |
| Q8R1V4 | TMED4 | 1,327641062 | 1,335368292 | 0,383658459 | 0,953332187 | 1,137758925 | 1,630246588 | 1,048661272 | 0,991288899 | 0,947124942 | 1,151016125 | 0,552025 |
| Q9WUC3 | LY6H  | 0,763432451 | 0,793797062 | 1,223864225 | 1,218906262 | 0,721517162 | 1,4796441   | 1,270606075 | 1,046933539 | 1,050173268 | 1,113774829 | 0,552492 |
| Q8R5C5 | ACTY  | 1,001924755 | 1,075701561 | 1,014243162 | 0,908130522 | 1,079453251 | 1,019774582 | 0,967327619 | 1,003987668 | 1,045139816 | 1,023136587 | 0,553676 |
| Q3THE2 | ML12B | 1,064961819 | 0,979099369 | 1,036441935 | 0,919496877 | 1,046040097 | 1,057669598 | 0,998891388 | 0,789320062 | 0,912213607 | 0,96082695  | 0,555621 |
| Q62442 | VAMP1 | 0,794046551 | 1,209606159 | 1,0192004   | 0,977146889 | 0,936038019 | 0,993955911 | 1,087704283 | 0,90524442  | 0,789371578 | 0,942462842 | 0,557583 |
| Q99PU5 | ACBG1 | 1,026154538 | 1,065400888 | 0,880839728 | 1,027604846 | 0,99558556  | 1,177133798 | 1,00458563  | 1,015731167 | 0,974080606 | 1,033423352 | 0,56102  |
| P24529 | TY3H  | 1,05919306  | 0,759514179 | 1,331033802 | 0,850258959 | 1,358504751 | 0,752828618 | 0,788851971 | 1,114597952 | 1,676316115 | 1,138219881 | 0,56206  |
| Q91YQ5 | RPN1  | 0,972766058 | 0,944178138 | 1,022664494 | 1,06039131  | 0,986914536 | 1,040717113 | 1,051277823 | 0,963320853 | 1,051245953 | 1,018695256 | 0,562302 |
| Q91W89 | MA2C1 | 0,992488499 | 1,02208092  | 0,94389946  | 1,041531121 | 1,198927037 | 0,973534828 | 1,002292616 | 0,934212241 | 1,059639506 | 1,033721245 | 0,562556 |
| Q8BX94 | OSBL2 | 0,430973042 | 1,025423034 | 2,03136475  | 0,512239174 | 0,664963406 | 0,445256033 | 0,519476399 | 0,797666632 | 1,425281141 | 0,770528722 | 0,564066 |
| Q9Z2I9 | SUCB1 | 0,967391185 | 1,003488621 | 0,976512686 | 1,052607509 | 0,990442162 | 0,92036608  | 1,068863189 | 1,093173151 | 1,044315059 | 1,023431928 | 0,565367 |
| Q8BGT8 | PHIPL | 0,963477728 | 0,978525219 | 1,018969127 | 1,039027925 | 1,08524824  | 1,041293255 | 1,109651514 | 0,996884844 | 0,901043324 | 1,026824236 | 0,566113 |
| P13020 | GELS  | 1,118323369 | 1,091042221 | 0,853694944 | 0,936939466 | 1,040736976 | 1,101382548 | 1,178111912 | 1,00945465  | 0,899783119 | 1,045893841 | 0,567255 |
| Q9Z1P6 | NDUA7 | 0,980122577 | 1,141450818 | 0,837168352 | 1,041258253 | 0,985043126 | 1,153022506 | 1,169302462 | 1,053899888 | 0,883921355 | 1,049037867 | 0,569887 |
| O55100 | SNG1  | 1,013773593 | 0,93323577  | 1,055806821 | 0,997183816 | 1,09702319  | 0,960009189 | 0,911064959 | 0,931353403 | 0,972393284 | 0,974368805 | 0,570668 |
| Q05816 | FABP5 | 0,893786608 | 1,071243435 | 0,987173728 | 1,047796229 | 0,947679848 | 0,915459535 | 1,09264156  | 1,006636028 | 0,872184954 | 0,966920385 | 0,570965 |
| O55125 | NIPS1 | 0,986984048 | 1,000714083 | 0,922393819 | 1,08990805  | 0,968243602 | 0,631030462 | 1,063034275 | 1,028054603 | 1,027696567 | 0,943611902 | 0,572365 |
| Q9Z2U1 | PSA5  | 0,94913604  | 1,01341591  | 1,013048292 | 1,024399759 | 0,953414461 | 0,919006135 | 1,078382305 | 1,001139108 | 0,943628627 | 0,979114127 | 0,572881 |
| P56564 | EAA1  | 0,897084441 | 0,999466722 | 1,113100999 | 0,990347838 | 0,798662536 | 1,042608769 | 0,948712798 | 0,925558405 | 1,082460134 | 0,959600528 | 0,572977 |
| Q9CZT8 | RAB3B | 1,174169824 | 0,853844333 | 0,906441719 | 1,065544123 | 1,062589537 | 1,078553373 | 0,802598332 | 0,958927774 | 0,828293667 | 0,946192537 | 0,575338 |
| P60843 | IF4A1 | 0,739804207 | 1,060689669 | 1,095374067 | 1,104132058 | 1,089823075 | 0,888186683 | 1,051439795 | 1,043978088 | 1,205623436 | 1,055810215 | 0,579001 |
| Q9Z127 | LAT1  | 1,279715683 | 1,466584119 | 1,188312186 | 0,065388012 | 1,322200635 | 1,328669364 | 1,171691102 | 1,166747986 | 0,865521184 | 1,170966054 | 0,579321 |

|        |       |             |             |             |             |             |             |             |             |             |             |          |
|--------|-------|-------------|-------------|-------------|-------------|-------------|-------------|-------------|-------------|-------------|-------------|----------|
| P54227 | STMN1 | 0,990314383 | 0,911538847 | 1,031838841 | 1,066307929 | 1,002178112 | 0,967066806 | 1,003107633 | 1,016063682 | 0,904687103 | 0,978620667 | 0,583128 |
| P16546 | SPTN1 | 0,93666246  | 1,016053863 | 1,046948132 | 1,000335545 | 1,077468502 | 1,013562782 | 0,959726136 | 0,966154077 | 1,088839574 | 1,021150214 | 0,583604 |
| P63242 | IF5A1 | 0,855960433 | 1,068174498 | 1,051904467 | 1,023960602 | 0,966895885 | 0,855075903 | 1,093244593 | 0,978851631 | 0,929888687 | 0,96479134  | 0,584226 |
| O55126 | NIPS2 | 1,009921321 | 1,007473908 | 0,975135378 | 1,007469394 | 0,977741884 | 0,854419987 | 0,999386552 | 1,022452692 | 1,038316488 | 0,97846352  | 0,586201 |
| P48036 | ANXA5 | 1,081133514 | 1,03401526  | 0,871156584 | 1,013694642 | 1,035259816 | 0,955142842 | 1,06866428  | 0,941403329 | 0,820195762 | 0,964133206 | 0,587202 |
| Q5XJY5 | COPD  | 0,963482368 | 0,992904759 | 1,047578305 | 0,996034567 | 1,060924875 | 0,840905324 | 0,969130903 | 1,049577491 | 0,943502756 | 0,97280827  | 0,587485 |
| Q9QYB1 | CLIC4 | 1,148647712 | 0,989427596 | 0,8776032   | 0,984321492 | 0,994756955 | 1,103726998 | 0,994482095 | 0,931743355 | 0,735595474 | 0,952060975 | 0,588642 |
| P08551 | NFL   | 1,264323968 | 1,108765773 | 0,702205213 | 0,924705046 | 1,206961515 | 1,147901551 | 1,086848577 | 1,08022921  | 0,839444416 | 1,072277003 | 0,589595 |
| Q60902 | EP15R | 0,782069598 | 1,012471381 | 1,215089657 | 0,990369364 | 1,117938127 | 0,857539529 | 1,011706529 | 0,767134265 | 0,952821451 | 0,94142798  | 0,590226 |
| Q9CWS0 | DDAH1 | 1,047967679 | 0,96866431  | 0,962375183 | 1,020992827 | 1,144045034 | 1,093026748 | 0,952075524 | 1,022986118 | 0,928111818 | 1,028049049 | 0,59096  |
| Q9WV60 | GSK3B | 1,005912522 | 0,956247673 | 1,092648856 | 0,945190948 | 0,954559671 | 0,839046386 | 1,078532017 | 0,972112881 | 1,006908268 | 0,970231845 | 0,59341  |
| Q8BJ11 | S6A17 | 0,881158813 | 1,031760811 | 1,081429804 | 1,005650571 | 1,028022296 | 0,881633063 | 0,936254129 | 0,878328454 | 1,102319511 | 0,965311491 | 0,593617 |
| Q9D1G5 | LRC57 | 1,322009092 | 1,084605525 | 1,280628073 | 0,31275731  | 1,056361789 | 1,224768827 | 1,164834797 | 1,209809843 | 0,944346642 | 1,12002438  | 0,593768 |
| O35344 | IMA4  | 0,913472321 | 1,051603575 | 1,032095282 | 1,002828822 | 1,031912529 | 0,942580866 | 1,004430232 | 0,997594593 | 0,925639887 | 0,980431621 | 0,594357 |
| Q61595 | KTN1  | 1,960613337 | 0,680268385 | 0,577035281 | 0,782082997 | 0,764255568 | 1,069612037 | 0,688511795 | 0,866145709 | 0,797772149 | 0,837259452 | 0,595871 |
| E9PUL5 | PRRT2 | 1,212433972 | 1,044419464 | 0,836922963 | 0,906223601 | 1,119396633 | 1,020614796 | 0,899107839 | 0,874992334 | 0,821652648 | 0,94715285  | 0,595894 |
| Q99K51 | PLST  | 1,107716967 | 0,997462376 | 0,866249578 | 1,028571079 | 1,241905725 | 1,02951831  | 1,005739612 | 0,895185913 | 1,041452387 | 1,042760389 | 0,598034 |
| Q62108 | DLG4  | 0,927197909 | 0,872209983 | 1,178825785 | 1,021766323 | 1,108566772 | 0,936917524 | 1,008396959 | 0,98461364  | 1,172668716 | 1,042232722 | 0,598116 |
| P58771 | TPM1  | 1,042917333 | 0,99911066  | 1,03806347  | 0,919908537 | 1,044813362 | 0,872879457 | 1,033562294 | 0,932059131 | 0,994212091 | 0,975505267 | 0,598236 |
| Q80ZJ6 | ZER1  | 0,941719521 | 1,044683108 | 0,885898663 | 1,127698708 | 0,975362089 | 0,771145809 | 1,010572523 | 0,986206218 | 1,056612228 | 0,959979773 | 0,60123  |
| P61164 | ACTZ  | 1,050535426 | 1,113066049 | 0,79757812  | 1,038820405 | 1,14624068  | 1,118431654 | 0,986909515 | 0,991567553 | 0,960768124 | 1,040783505 | 0,601834 |
| Q9Z0Y1 | DCTN3 | 0,977242    | 1,021432768 | 0,940580398 | 1,060744833 | 0,952545322 | 1,030872219 | 1,045950957 | 1,008490024 | 0,821845026 | 0,971940709 | 0,603347 |
| P13707 | GPDA  | 1,092298058 | 1,024248775 | 0,797300981 | 1,086152185 | 1,095632322 | 0,829829139 | 1,177623339 | 1,232858395 | 0,946485489 | 1,056485737 | 0,604058 |
| Q9CQZ5 | NDUA6 | 0,96635513  | 1,006062729 | 0,992599929 | 1,034982212 | 0,917531975 | 1,159204848 | 1,210202264 | 0,946571539 | 0,956287824 | 1,03795969  | 0,604724 |
| Q9ES97 | RTN3  | 0,991700073 | 1,021336432 | 1,00096296  | 0,986000536 | 1,123102291 | 1,043157893 | 0,976375461 | 0,971943746 | 0,977116867 | 1,018339252 | 0,605779 |
| Q9CX86 | ROAO  | 0,604909751 | 1,114852265 | 1,123919595 | 1,156318388 | 0,6132559   | 0,994294748 | 1,064320409 | 0,966508976 | 0,965947253 | 0,920865457 | 0,605796 |
| Q8R2Y0 | ABHD6 | 1,04326083  | 0,869371236 | 1,084232737 | 1,003135197 | 1,158290913 | 0,915759219 | 0,810547462 | 0,86201938  | 1,032264237 | 0,955776242 | 0,606036 |
| Q99JP7 | GGT7  | 1,008976122 | 1,000330801 | 1,011500521 | 0,979192557 | 1,016713778 | 0,910188121 | 1,029986421 | 0,810787284 | 1,08253977  | 0,970043075 | 0,606474 |
| P24369 | PPIB  | 0,950253493 | 1,08308516  | 1,085085037 | 0,881576311 | 1,008676373 | 1,052079145 | 1,085680625 | 1,003854387 | 0,982139204 | 1,026485947 | 0,606762 |
| D3YVFO | AKAP5 | 0,776235874 | 0,523574909 | 1,64073298  | 1,059456237 | 1,033490828 | 0,930288936 | 0,912194819 | 0,975627251 | 2,00190308  | 1,170700983 | 0,606971 |
| O08756 | HCD2  | 1,105048739 | 0,97895429  | 0,954120188 | 0,961876783 | 0,946977253 | 1,084034675 | 0,947219707 | 0,978706209 | 0,922933303 | 0,975974229 | 0,608266 |
| P62717 | RL18A | 0,902541717 | 1,044279247 | 1,048250931 | 1,004928105 | 1,078683227 | 0,980892892 | 0,985582143 | 0,864010381 | 0,960145434 | 0,973862815 | 0,609752 |
| Q9JKV1 | ADRM1 | 0,972031951 | 1,163523658 | 0,832780239 | 1,031664153 | 1,001637981 | 1,11074276  | 1,120659619 | 0,714425667 | 0,741166591 | 0,937726524 | 0,610634 |
| P60904 | DNJC5 | 1,096045533 | 1,099839681 | 0,855962505 | 0,948152281 | 1,0148729   | 1,087168975 | 0,949728013 | 0,82461256  | 0,931349805 | 0,96154645  | 0,61072  |
| P51660 | DHB4  | 0,982610817 | 0,97672996  | 0,973011455 | 1,067647768 | 0,97951607  | 1,009154442 | 1,060727894 | 0,94413274  | 0,913232457 | 0,981352721 | 0,612455 |
| P37040 | NCPR  | 0,986491346 | 1,1404036   | 0,882550321 | 0,990554733 | 0,701997474 | 1,080568223 | 1,119936529 | 1,217498963 | 1,182146126 | 1,060429463 | 0,615451 |
| Q8K377 | LRRT1 | 1,084366177 | 0,948241854 | 0,848607547 | 1,118784422 | 1,514321939 | 1,135292761 | 0,762566557 | 0,99387127  | 0,988905428 | 1,078991591 | 0,617186 |
| Q3UHH0 | AAK1  | 1,077238585 | 1,051783429 | 1,008539997 | 0,862437989 | 1,10698288  | 0,860584333 | 0,959198296 | 0,921491704 | 0,988014067 | 0,967254256 | 0,617555 |
| P40142 | TKT   | 0,978810044 | 1,091023872 | 0,91882141  | 1,011344674 | 1,00909088  | 0,988621262 | 1,067113854 | 1,067047216 | 0,969614188 | 1,02029748  | 0,617839 |
| P70175 | DLG3  | 0,921778592 | 0,96473246  | 1,084036172 | 1,029452776 | 1,040502485 | 0,874629502 | 0,89428011  | 0,915908192 | 1,114821049 | 0,968028267 | 0,619585 |

|        |       |             |             |             |             |             |             |             |             |             |             |          |
|--------|-------|-------------|-------------|-------------|-------------|-------------|-------------|-------------|-------------|-------------|-------------|----------|
| Q8BGD9 | IF4B  | 0,989933711 | 1,387324703 | 0,683161555 | 0,93958003  | 0,94552642  | 1,032118422 | 0,71400188  | 1,159532955 | 0,731311787 | 0,916498293 | 0,619791 |
| P61971 | NTF2  | 0,905486048 | 1,034047712 | 1,071280136 | 0,989186104 | 0,85932324  | 1,094108143 | 1,139611169 | 0,94261805  | 0,727971898 | 0,9527265   | 0,620407 |
| P42669 | PURA  | 0,93651178  | 1,101201394 | 0,92326002  | 1,039026807 | 1,008063037 | 0,981510928 | 0,981831816 | 0,995589508 | 0,929420615 | 0,979283181 | 0,623119 |
| Q99L13 | 3HIDH | 1,072118756 | 1,051206883 | 0,90839139  | 0,968282971 | 1,03582527  | 0,944579641 | 1,060077574 | 0,944070886 | 0,889877819 | 0,974886238 | 0,623772 |
| Q9JLM8 | DCLK1 | 0,921844403 | 0,971881586 | 1,20654396  | 0,899730052 | 1,301372562 | 0,903455915 | 0,991275767 | 1,019558713 | 1,034957552 | 1,050124102 | 0,624166 |
| Q922Q8 | LRC59 | 1,104441925 | 0,988558665 | 0,914969193 | 0,992030216 | 1,055738952 | 1,102283019 | 0,880644952 | 0,924339652 | 0,875492655 | 0,967699846 | 0,625084 |
| Q8C166 | CPNE1 | 1,004815687 | 0,876351703 | 1,061615999 | 1,057216611 | 0,957898157 | 0,709965846 | 1,038370991 | 1,149744681 | 0,91143218  | 0,953482371 | 0,625448 |
| Q62093 | SRSF2 | 0,953536841 | 0,99721655  | 1,112228068 | 0,93701854  | 1,058013085 | 0,983336161 | 1,055568735 | 1,013519788 | 0,988401533 | 1,01976786  | 0,628978 |
| Q9QXL2 | KI21A | 0,972949503 | 0,966290064 | 1,005012338 | 1,055748094 | 1,231750029 | 1,061616977 | 0,888019669 | 0,903861546 | 1,104601924 | 1,037970029 | 0,629222 |
| P61027 | RAB10 | 0,752340362 | 0,956764499 | 1,436886048 | 0,854009091 | 0,837242913 | 0,780506101 | 1,016992007 | 1,128025488 | 0,854183895 | 0,923390081 | 0,629376 |
| P28660 | NCKP1 | 0,943013998 | 1,0040164   | 1,035114332 | 1,017855269 | 1,059653501 | 0,887348393 | 0,883576564 | 0,906723735 | 1,116282444 | 0,970716927 | 0,629866 |
| Q9JLV5 | CUL3  | 0,982068513 | 0,968454516 | 1,02123332  | 1,028243652 | 0,964469136 | 0,995873473 | 1,045175366 | 0,868144621 | 1,031085963 | 0,980949712 | 0,63123  |
| E9Q8I9 | FRY   | 1,000469619 | 1,003250085 | 1,024353639 | 0,971926658 | 1,06826653  | 0,866791408 | 0,835790954 | 0,8028593   | 1,204996813 | 0,955741001 | 0,632367 |
| P63141 | KCNA2 | 0,956201038 | 1,050063395 | 1,039368465 | 0,954367102 | 1,011992369 | 1,086686175 | 0,911242996 | 0,941703106 | 0,942986578 | 0,978922245 | 0,634669 |
| Q8K212 | PACS1 | 0,578821725 | 1,112624902 | 1,161876221 | 1,146677151 | 1,123697665 | 0,991374046 | 1,139154505 | 0,9000587   | 1,183119213 | 1,067480826 | 0,638143 |
| O88487 | DC1I2 | 0,971398565 | 0,988032779 | 1,071340876 | 0,96922778  | 1,060483911 | 0,916535301 | 1,11461554  | 0,728752872 | 0,985750678 | 0,96122766  | 0,638481 |
| Q8CGA0 | PPM1F | 0,773231979 | 1,075433294 | 1,039718381 | 1,111616345 | 0,795446451 | 0,916571974 | 1,025952873 | 1,104574544 | 0,936872199 | 0,955883608 | 0,638752 |
| Q9Z2U0 | PSA7  | 0,974476672 | 0,954153852 | 0,985595768 | 1,085773707 | 1,077561685 | 1,085772034 | 0,998105136 | 0,963128659 | 0,971638938 | 1,01924129  | 0,639259 |
| P27659 | RL3   | 0,910128836 | 1,079826162 | 0,949574458 | 1,060470544 | 1,045584761 | 1,030756913 | 1,047201013 | 1,048241182 | 0,935816148 | 1,021520003 | 0,639269 |
| A2AGT5 | CKAP5 | 0,825334178 | 1,086249832 | 0,943095909 | 1,145320081 | 1,172071275 | 0,800741661 | 1,079066481 | 1,13471716  | 1,051273414 | 1,047573998 | 0,639896 |
| P48318 | DCE1  | 0,972279197 | 1,121909504 | 0,912317078 | 0,993494221 | 0,952519254 | 0,940934727 | 0,948959713 | 1,062318893 | 0,982877515 | 0,97752202  | 0,642224 |
| Q3UHB1 | NT5D3 | 1,072497393 | 1,207478236 | 0,528271831 | 1,19175254  | 0,966070247 | 0,84900843  | 1,010619949 | 1,012050197 | 0,80200347  | 0,927950458 | 0,643322 |
| Q61879 | MYH10 | 0,934954516 | 1,002734627 | 1,128291068 | 0,934019788 | 1,137711108 | 1,038665614 | 0,936521783 | 0,89553471  | 1,167361538 | 1,03515895  | 0,643549 |
| Q9ERK4 | XPO2  | 0,959761342 | 1,033431695 | 0,967401987 | 1,039404976 | 1,048365389 | 1,070048741 | 0,985505833 | 0,992654199 | 0,971850381 | 1,013684908 | 0,646813 |
| O88543 | CSN3  | 0,910583216 | 1,10236833  | 0,857796715 | 1,129251739 | 1,026534269 | 0,92148848  | 1,105782161 | 1,038334464 | 1,073304717 | 1,033088818 | 0,647842 |
| Q9R0K7 | AT2B2 | 1,079517313 | 0,966185704 | 1,025857039 | 0,928439944 | 1,19285067  | 1,078355086 | 0,937635779 | 0,913107044 | 1,03114647  | 1,03061901  | 0,64843  |
| Q8K3E5 | AHI1  | 0,850910993 | 1,109957395 | 1,003837048 | 1,035294563 | 0,764479706 | 1,194942191 | 1,093161346 | 0,816041673 | 0,882044268 | 0,950133837 | 0,650754 |
| Q99L18 | HGS   | 1,127619849 | 0,865353898 | 0,882808729 | 1,124217524 | 1,066849089 | 1,01767913  | 0,857479889 | 0,705357106 | 1,103613689 | 0,950195781 | 0,651865 |
| Q60864 | STIP1 | 0,959388437 | 1,072811599 | 0,959632344 | 1,00816762  | 0,989063256 | 0,941249117 | 1,046230181 | 1,044034761 | 1,061015073 | 1,016318477 | 0,652081 |
| P62702 | RS4X  | 0,974902898 | 0,893053226 | 0,989289166 | 1,14275471  | 1,034877531 | 0,857713709 | 1,098150339 | 0,951872836 | 0,898880928 | 0,968299069 | 0,653557 |
| Q8CDN6 | TXNL1 | 0,915223571 | 1,057267117 | 0,982919747 | 1,044589564 | 1,026066766 | 0,993198817 | 1,105480227 | 0,977217073 | 0,98913599  | 1,018219775 | 0,654    |
| Q9R1P1 | PSB3  | 1,030454559 | 1,02635535  | 0,926103531 | 1,017086561 | 1,029779755 | 1,2615267   | 0,989919265 | 0,955943631 | 0,92793965  | 1,0330218   | 0,656036 |
| Q8C167 | PPCEL | 1,114128051 | 1,125825151 | 0,851557552 | 0,908489245 | 1,020276251 | 0,887670079 | 0,914362137 | 1,090633078 | 0,911448233 | 0,964877956 | 0,657423 |
| P17047 | LAMP2 | 0,035501189 | 1,47897584  | 0,992907071 | 1,492615901 | 1,203671634 | 0,933693529 | 1,258824032 | 1,166020815 | 1,147740753 | 1,141990152 | 0,657507 |
| Q921M7 | FA49B | 1,085598377 | 0,965194997 | 0,981079936 | 0,96812669  | 1,072078694 | 1,059509889 | 0,977508668 | 0,90540662  | 0,86363431  | 0,975627636 | 0,65968  |
| Q99L47 | F10A1 | 1,00987989  | 1,052139676 | 0,937606265 | 1,000374168 | 1,000047215 | 0,955172566 | 1,025828397 | 1,046989925 | 1,035937365 | 1,012795094 | 0,659875 |
| Q14BI2 | GRM2  | 0,910805825 | 0,880106346 | 1,092667701 | 1,116420128 | 1,270285314 | 0,823403272 | 0,879319782 | 0,99166431  | 1,328821232 | 1,058698782 | 0,660048 |
| Q9QW16 | SRCN1 | 0,994006366 | 0,999433825 | 1,062343885 | 0,944215924 | 1,145995257 | 0,755232711 | 0,96985929  | 0,943089557 | 1,014416642 | 0,965718692 | 0,66009  |
| Q9Z2Y3 | HOME1 | 0,879933491 | 0,805420958 | 1,328988322 | 0,985657229 | 1,060144735 | 0,718223999 | 0,811758227 | 0,981533636 | 1,124310321 | 0,939194183 | 0,662131 |
| Q4V9Z5 | SE6L2 | 0,704662123 | 1,069769942 | 1,085616288 | 1,139951647 | 1,112859019 | 0,472013521 | 1,032002893 | 1,106815915 | 0,910892089 | 0,926916687 | 0,663989 |

|        |       |             |             |             |             |             |             |             |             |             |             |          |
|--------|-------|-------------|-------------|-------------|-------------|-------------|-------------|-------------|-------------|-------------|-------------|----------|
| Q91Z53 | GRHPR | 1,013167025 | 1,083201524 | 0,758123896 | 1,145507556 | 1,124682153 | 0,981175872 | 0,885589739 | 1,075614967 | 0,66466406  | 0,946345358 | 0,665186 |
| Q60737 | CSK21 | 1,01386886  | 0,943031917 | 0,989750522 | 1,0533487   | 1,028352582 | 0,963506776 | 0,946189897 | 0,866321606 | 1,089498937 | 0,97877396  | 0,668252 |
| P49443 | PPM1A | 0,943334879 | 1,034609764 | 1,060350862 | 0,961704496 | 1,084099104 | 0,95544903  | 0,966011774 | 0,932444931 | 0,975674789 | 0,982735926 | 0,669641 |
| Q9Z0J4 | NOS1  | 0,70499088  | 0,935453997 | 1,282215834 | 1,077339289 | 0,969241081 | 0,979184058 | 1,046698134 | 0,948303602 | 0,798240982 | 0,948333571 | 0,670282 |
| Q9D379 | HYEP  | 0,999935044 | 1,066997678 | 0,990325474 | 0,942741805 | 0,876553204 | 1,073890947 | 1,06172782  | 0,9452365   | 0,934658486 | 0,978413391 | 0,672664 |
| P51150 | RAB7A | 0,975948316 | 1,002680397 | 1,011087571 | 1,010283716 | 0,991698861 | 1,009754523 | 1,02764874  | 1,014535676 | 0,894476884 | 0,987622937 | 0,673382 |
| Q62261 | SPTB2 | 0,949936576 | 1,062170779 | 1,011796973 | 0,976095672 | 1,128023532 | 0,938714569 | 0,982021344 | 0,990651196 | 1,055049864 | 1,018892101 | 0,674294 |
| Q8BG32 | PSD11 | 0,947697513 | 1,006972404 | 1,051037207 | 0,994292877 | 1,065493604 | 0,916507783 | 1,009656958 | 1,116250205 | 0,985915659 | 1,018764842 | 0,675511 |
| P99029 | PRDX5 | 0,961761375 | 1,02551667  | 1,005059742 | 1,007662213 | 0,948074369 | 1,05140502  | 1,01570118  | 1,04649238  | 0,992048045 | 1,010744199 | 0,675714 |
| Q8C1B7 | SEP11 | 1,123557441 | 0,954594791 | 1,03939333  | 0,882454438 | 1,069262856 | 1,02680078  | 1,000160955 | 0,986355889 | 1,023041145 | 1,021124325 | 0,676719 |
| O70493 | SNX12 | 0,965142147 | 0,990431079 | 0,995086494 | 1,04934028  | 1,002486387 | 1,045171569 | 0,995845672 | 1,050170097 | 0,959521    | 1,010638945 | 0,678488 |
| Q6PHZ2 | KCC2D | 0,867855992 | 0,999517374 | 1,148425632 | 0,984201002 | 0,977786064 | 0,906699976 | 0,950776359 | 1,04143927  | 1,001017981 | 0,97554393  | 0,679449 |
| Q8K1M6 | DNM1L | 0,933113141 | 1,051817878 | 1,016688164 | 0,998380817 | 1,050567824 | 0,94816313  | 0,957799776 | 0,924115897 | 1,040849146 | 0,984299155 | 0,679548 |
| Q8VEH3 | ARL8A | 1,080891344 | 1,063101077 | 0,86244732  | 0,993560259 | 0,96546517  | 1,111608021 | 0,230802641 | 1,269238829 | 0,977493581 | 0,910921649 | 0,680248 |
| P62880 | GBB2  | 0,886993561 | 0,965748185 | 1,135431232 | 1,011827022 | 0,78447509  | 1,128732105 | 0,958137926 | 0,963039177 | 0,999546517 | 0,966786163 | 0,680512 |
| Q3UVL4 | VPS51 | 0,903373228 | 1,057471132 | 0,983145852 | 1,056009788 | 0,981754107 | 0,854910856 | 0,987631165 | 0,809968099 | 1,190691728 | 0,964991191 | 0,681323 |
| P14211 | CALR  | 0,979046533 | 1,038420936 | 0,943912405 | 1,038620126 | 0,95516522  | 0,97366605  | 1,052407391 | 1,000782544 | 0,955952736 | 0,987594788 | 0,682711 |
| Q8BX70 | VP13C | 0,784680896 | 1,239065802 | 1,042835908 | 0,933417393 | 1,032330483 | 1,02845132  | 0,976594384 | 0,972667337 | 1,192505894 | 1,040509884 | 0,684073 |
| Q9DBR7 | MYPT1 | 0,776301069 | 1,149714311 | 1,019679348 | 1,054305272 | 0,965232782 | 0,91262241  | 0,93496299  | 0,935113831 | 1,086623517 | 0,966911106 | 0,684863 |
| Q8R2R9 | AP3M2 | 0,425639655 | 1,043424877 | 1,31653127  | 1,214404198 | 1,138713296 | 1,002293956 | 0,908028748 | 1,186533581 | 1,154196098 | 1,077953136 | 0,68652  |
| P54823 | DDX6  | 0,937533409 | 1,027783087 | 1,084171008 | 0,950512496 | 1,016443985 | 0,845723022 | 0,973134121 | 1,033891478 | 1,026003121 | 0,979039145 | 0,686642 |
| P57746 | VATD  | 0,939768439 | 0,997361312 | 1,009054686 | 1,053815563 | 1,072865926 | 0,937617559 | 1,038967476 | 0,998950691 | 0,84715717  | 0,979111765 | 0,687217 |
| Q9CQN1 | TRAP1 | 1,027023228 | 0,95316888  | 0,89094211  | 1,128865783 | 0,994833026 | 1,111356493 | 0,964059087 | 0,994860172 | 1,047053361 | 1,022432428 | 0,688685 |
| Q60692 | PSB6  | 0,984967243 | 0,970273752 | 1,036193235 | 1,00856577  | 0,992273894 | 1,064309745 | 1,080696941 | 0,933507267 | 0,810180591 | 0,976193688 | 0,689515 |
| Q6ZWX6 | IF2A  | 1,055064746 | 1,086796962 | 0,893393203 | 0,964745089 | 1,137204825 | 0,993289568 | 0,958322511 | 0,950263418 | 0,815390468 | 0,970894158 | 0,689775 |
| Q8R191 | SNG3  | 1,188596192 | 0,975581865 | 1,126937487 | 0,708884457 | 0,981622513 | 1,217902198 | 1,009434284 | 0,810848579 | 0,693083206 | 0,942578156 | 0,690863 |
| P37804 | TAGL  | 0,79099109  | 1,1467709   | 1,223452621 | 0,838785389 | 0,172713654 | 1,999064433 | 0,763751223 | 0,764315612 | 0,55756972  | 0,851482928 | 0,692602 |
| Q9R0P3 | ESTD  | 1,085057732 | 1,008505869 | 0,897631574 | 1,008804825 | 1,000333524 | 1,133816313 | 0,978829342 | 0,836904093 | 0,916070153 | 0,973190685 | 0,693543 |
| Q61102 | ABCB7 | 1,158447986 | 0,96817494  | 0,964260313 | 0,909116761 | 1,093596122 | 0,94885874  | 0,880614602 | 1,008309494 | 0,939369505 | 0,974149693 | 0,693717 |
| Q9QUH0 | GLRX1 | 0,749043833 | 1,052909576 | 1,198795525 | 0,999251066 | 0,960549652 | 0,932836088 | 0,864146633 | 1,079284262 | 0,977449028 | 0,962853133 | 0,696315 |
| O08759 | UBE3A | 0,775984631 | 1,18580808  | 0,805767162 | 1,232440126 | 0,905764432 | 1,106469827 | 1,110834108 | 1,082483982 | 1,027832602 | 1,04667699  | 0,696894 |
| P17742 | PPIA  | 0,868232287 | 0,891651694 | 1,122931236 | 1,117184783 | 0,935918942 | 0,928987733 | 1,022149936 | 1,013234436 | 0,968231298 | 0,973704469 | 0,696999 |
| P16125 | LDHB  | 1,068386547 | 0,959956771 | 0,949502774 | 1,022153909 | 1,060384836 | 1,003362698 | 1,007941305 | 0,964058868 | 0,878963901 | 0,982942322 | 0,697229 |
| Q9ERS2 | NDUAD | 0,938425634 | 1,052247977 | 1,009433655 | 0,999892734 | 0,923466015 | 1,005998517 | 1,083411677 | 1,07436773  | 0,991445056 | 1,015737799 | 0,699591 |
| Q922Q4 | P5CR2 | 1,009544857 | 0,951815495 | 0,986976451 | 1,051663197 | 1,066804004 | 0,983351944 | 0,950537498 | 1,020673933 | 1,037936288 | 1,011860733 | 0,7003   |
| Q8BWF0 | SSDH  | 0,999468143 | 1,021191462 | 0,973619323 | 1,005721072 | 0,965637876 | 1,085690416 | 1,009577062 | 0,929276576 | 0,943665048 | 0,986769395 | 0,701699 |
| P47791 | GSHR  | 1,176146993 | 0,847815534 | 0,892814362 | 1,083223111 | 0,72574516  | 0,985943787 | 1,093165174 | 0,951044215 | 1,046192262 | 0,96041812  | 0,702067 |
| Q8VEK0 | CC50A | 0,202627678 | 1,232329431 | 1,434589072 | 1,13045382  | 0,834505947 | 1,162931354 | 1,101852551 | 1,12690283  | 1,277708881 | 1,100780312 | 0,703191 |
| Q91WQ3 | SYYC  | 0,99134443  | 1,02118385  | 0,983695018 | 1,003776702 | 1,029458439 | 0,978716529 | 1,046091131 | 0,968640268 | 0,926839553 | 0,989949184 | 0,704717 |
| Q76MZ3 | 2AAA  | 0,936832627 | 1,072664621 | 0,994600784 | 0,995901968 | 0,869956245 | 1,020610264 | 1,041418019 | 1,07126295  | 1,097700326 | 1,020189561 | 0,705674 |

|        |       |             |             |             |             |             |             |             |             |             |             |          |
|--------|-------|-------------|-------------|-------------|-------------|-------------|-------------|-------------|-------------|-------------|-------------|----------|
| P62761 | VISL1 | 0,965631986 | 1,00344518  | 1,008546436 | 1,022376398 | 0,911560538 | 0,993469197 | 1,091695273 | 1,051897983 | 0,851467016 | 0,980018001 | 0,708006 |
| Q8R1I1 | QCR9  | 0,961544381 | 1,072472826 | 1,099486043 | 0,86649675  | 0,899323868 | 0,94810284  | 0,979812364 | 1,097884151 | 0,95775516  | 0,976575677 | 0,708607 |
| Q8R5J9 | PRAF3 | 1,010367545 | 1,024747649 | 0,980124036 | 0,98476077  | 1,032221369 | 0,915577107 | 1,035686754 | 0,999514294 | 1,080172202 | 1,012634345 | 0,708893 |
| Q0VBF8 | STUM  | 0,715774313 | 0,913160318 | 1,25319174  | 1,117873628 | 0,965414067 | 0,784572755 | 0,998657407 | 0,870445948 | 1,141703949 | 0,952158825 | 0,711188 |
| P62482 | KCAB2 | 1,074570679 | 1,049389769 | 0,838256174 | 1,037783377 | 0,988102892 | 1,124297966 | 0,936890031 | 0,904077197 | 0,922576764 | 0,97518897  | 0,717157 |
| P50544 | ACADV | 1,013941902 | 0,90086203  | 1,000232949 | 1,084963119 | 0,849060944 | 1,01520694  | 1,052913968 | 1,044870116 | 0,934136758 | 0,979237745 | 0,717546 |
| Q8R0Y6 | AL1L1 | 0,983011106 | 1,070581148 | 0,938432813 | 1,007974934 | 0,964655174 | 1,075980239 | 0,989339993 | 0,958829269 | 0,943275225 | 0,98641598  | 0,717705 |
| Q3U0V1 | FUBP2 | 0,755652188 | 1,137831238 | 1,098171731 | 1,008344843 | 0,991929064 | 0,878502504 | 0,923727155 | 0,947217652 | 1,097186352 | 0,967712545 | 0,719636 |
| Q9Z2I8 | SUCB2 | 0,949028001 | 1,110851992 | 0,987717334 | 0,952402673 | 1,094411798 | 0,873299396 | 1,074721933 | 0,875804973 | 0,964031626 | 0,976453945 | 0,719782 |
| Q8C437 | PEX5R | 1,034851215 | 1,070069453 | 0,875131809 | 1,019947523 | 1,058871773 | 1,036547977 | 0,993212521 | 0,949112284 | 0,859988949 | 0,979546701 | 0,721006 |
| B9EJ86 | OSBL8 | 1,050606813 | 0,954161257 | 1,120952584 | 0,874279347 | 1,035847127 | 0,990468516 | 0,878913258 | 0,957161329 | 1,317599419 | 1,03599793  | 0,722428 |
| P23506 | PIMT  | 0,902219871 | 0,975425022 | 0,924365554 | 1,197989553 | 1,13302092  | 0,090160238 | 1,175059777 | 1,211964867 | 0,951819199 | 0,912405    | 0,732105 |
| Q99104 | MYO5A | 0,970056171 | 1,024567034 | 1,039210968 | 0,966165827 | 1,159898994 | 1,04454487  | 0,795164059 | 0,998234617 | 1,136645096 | 1,026897527 | 0,732257 |
| Q8CGP0 | H2B3B | 0,842826085 | 1,058473931 | 1,012713108 | 1,085986877 | 0,941493034 | 1,040825019 | 1,143377009 | 1,041431857 | 0,945945607 | 1,022614505 | 0,73361  |
| P16460 | ASSY  | 0,95349043  | 0,985444976 | 1,064315427 | 0,996749166 | 0,880894273 | 0,970887396 | 1,166883711 | 1,038533747 | 1,043901146 | 1,020220054 | 0,733819 |
| Q9Z1B3 | PLCB1 | 0,836342591 | 0,934279522 | 1,221104869 | 1,008273018 | 1,044939731 | 1,027942222 | 0,870127721 | 1,000968924 | 1,22575995  | 1,03394771  | 0,735413 |
| Q9Z1N5 | DX39B | 0,914823709 | 0,968931582 | 1,054144674 | 1,062100035 | 1,026981654 | 0,868175997 | 1,051871236 | 1,055554457 | 1,092619774 | 1,019040624 | 0,735587 |
| Q8VCT3 | AMPB  | 1,013708929 | 0,946971534 | 0,886855516 | 1,152464021 | 1,21150806  | 0,038623599 | 0,995954327 | 1,251086371 | 1,052066634 | 0,909847798 | 0,736768 |
| Q61490 | CD166 | 0,86224845  | 1,018858142 | 1,190870163 | 0,928023245 | 0,918181804 | 0,746838429 | 0,952297975 | 1,009825032 | 1,193190111 | 0,96406667  | 0,7374   |
| P51880 | FABP7 | 0,847029467 | 1,07667161  | 0,918265325 | 1,158033598 | 0,977956355 | 1,172700219 | 1,199416426 | 0,898844609 | 0,917754616 | 1,033334445 | 0,737828 |
| Q3UHL1 | CAMKV | 0,807848015 | 0,958698632 | 1,093816785 | 1,139636567 | 0,947991494 | 0,784328923 | 0,854740742 | 0,939688182 | 1,272469655 | 0,959843799 | 0,738032 |
| P12382 | PFKAL | 0,981514827 | 1,022683796 | 0,989704672 | 1,006096706 | 1,056455998 | 0,957797584 | 0,976593274 | 0,957392638 | 1,11512889  | 1,012673677 | 0,738981 |
| P48678 | LMNA  | 0,983436718 | 0,986892364 | 1,056940491 | 0,972730426 | 0,930937374 | 1,000967765 | 1,239583296 | 1,025901352 | 0,919536337 | 1,023385225 | 0,73943  |
| Q7TPR4 | ACTN1 | 0,697731328 | 0,872041184 | 1,384100166 | 1,046127322 | 1,273844489 | 0,990782984 | 1,246118363 | 0,122411449 | 1,997160042 | 1,126063465 | 0,740296 |
| P97315 | CSRP1 | 1,051551881 | 1,076393372 | 0,883544347 | 0,9885104   | 1,103483699 | 0,993447904 | 1,014856627 | 0,924440717 | 0,860364122 | 0,979318614 | 0,740957 |
| P80317 | TCPZ  | 0,92402125  | 1,072698309 | 0,938579209 | 1,064701232 | 0,986748321 | 0,965461927 | 1,040516523 | 0,965073497 | 0,976257063 | 0,986811466 | 0,741359 |
| Q64514 | TPP2  | 0,964370159 | 1,015663556 | 1,084255498 | 0,935710787 | 1,08320794  | 0,965109947 | 0,998196557 | 0,847858094 | 1,015769618 | 0,982028431 | 0,741576 |
| P61202 | CSN2  | 1,103610946 | 0,891633554 | 0,943238572 | 1,061516928 | 0,79761437  | 1,133573382 | 1,128364057 | 0,905753417 | 0,882258457 | 0,969512737 | 0,741635 |
| Q9D7X3 | DUS3  | 0,851451738 | 1,046477374 | 1,029165156 | 1,072905732 | 1,107736234 | 0,935191262 | 1,004995381 | 0,906859111 | 0,942415883 | 0,979439574 | 0,742129 |
| P70206 | PLXA1 | 0,821741056 | 0,97474433  | 0,941423952 | 1,262090662 | 1,067128519 | 0,993885856 | 0,924361836 | 1,070494519 | 1,096032086 | 1,030380563 | 0,744007 |
| Q68FH0 | PKP4  | 0,834192085 | 1,013631215 | 1,079528305 | 1,072648395 | 1,086303829 | 0,959633761 | 0,91844798  | 0,973312481 | 0,961309032 | 0,979801417 | 0,744451 |
| O54983 | CRYM  | 0,935972311 | 0,944860034 | 1,138122171 | 0,981045484 | 0,73369596  | 0,816400956 | 1,082360825 | 1,130842451 | 1,506399526 | 1,053939944 | 0,745531 |
| P63158 | HMGB1 | 0,963009187 | 0,956558095 | 0,903593555 | 1,176839163 | 1,001105947 | 0,971811217 | 1,288142549 | 0,952166668 | 0,940242912 | 1,030693858 | 0,74576  |
| Q68FL6 | SYMC  | 1,052021809 | 1,115786889 | 1,015631817 | 0,816559484 | 1,111232715 | 0,963206167 | 1,077013912 | 1,057902191 | 0,909756848 | 1,023822367 | 0,746919 |
| Q2M3X8 | PHAR1 | 0,976577603 | 0,967750559 | 1,09530455  | 0,960367288 | 0,56958221  | 0,916049916 | 0,984043597 | 1,167619106 | 1,151417974 | 0,95774256  | 0,747138 |
| P46096 | SYT1  | 0,936811557 | 0,97461275  | 1,023541855 | 1,065033838 | 1,083961907 | 0,827806606 | 0,992665016 | 1,121216155 | 1,081866472 | 1,021503231 | 0,749614 |
| P35278 | RAB5C | 0,936986579 | 1,166282001 | 0,861693741 | 1,03503768  | 1,062618767 | 1,376841346 | 1,103314422 | 0,889761432 | 0,174830374 | 0,921473268 | 0,749685 |
| Q8CI94 | PYGB  | 0,861116926 | 1,087458702 | 1,031659867 | 1,019764505 | 1,00937756  | 1,07425828  | 0,983408182 | 0,957677929 | 1,057055058 | 1,016355402 | 0,750134 |
| Q9D6R2 | IDH3A | 0,971787709 | 0,991515392 | 1,00147424  | 1,035222659 | 1,000591359 | 0,979336286 | 1,029762378 | 1,001863339 | 0,958948704 | 0,994100413 | 0,750256 |
| P80313 | TCPH  | 0,921059704 | 1,108722123 | 0,963070814 | 1,007147359 | 0,986528009 | 0,866452622 | 1,084632126 | 1,029627678 | 0,941607271 | 0,981769541 | 0,750546 |

|        |       |             |             |             |             |             |             |             |             |             |             |          |
|--------|-------|-------------|-------------|-------------|-------------|-------------|-------------|-------------|-------------|-------------|-------------|----------|
| Q91XL9 | OSBL1 | 1,085654769 | 1,07715744  | 0,99411736  | 0,843070431 | 1,108351489 | 1,001555265 | 1,010628453 | 1,023926228 | 0,949870396 | 1,018866366 | 0,751686 |
| Q61696 | HS71A | 0,896025434 | 1,292768717 | 1,329338311 | 0,481867538 | 0,905600561 | 0,86317836  | 1,021648159 | 0,954323855 | 0,96430871  | 0,941811929 | 0,75212  |
| P05063 | ALDOC | 1,132850854 | 0,874444633 | 0,930861016 | 1,061843497 | 1,052205165 | 1,026384435 | 0,991429623 | 0,997282421 | 0,818227264 | 0,977105781 | 0,752747 |
| Q9CVB6 | ARPC2 | 0,732678185 | 1,048190232 | 1,007573229 | 1,211558354 | 1,010370298 | 0,956641272 | 1,133767039 | 1,062672864 | 0,990171911 | 1,030724677 | 0,753619 |
| Q9CZD3 | SYG   | 0,930949562 | 1,125572249 | 1,002947054 | 0,940531135 | 0,993627714 | 0,995844505 | 0,978329611 | 1,004226592 | 1,104463167 | 1,015298318 | 0,754343 |
| Q9CQR4 | ACO13 | 0,897503462 | 1,093011003 | 1,00002917  | 1,009456365 | 0,895379434 | 1,041079765 | 1,091981066 | 0,990380147 | 0,887913161 | 0,981346715 | 0,75471  |
| P70297 | STAM1 | 0,814202356 | 1,167192867 | 0,889696432 | 1,128908346 | 1,216553938 | 0,844038433 | 0,948975351 | 1,115192906 | 1,045829706 | 1,034118067 | 0,75685  |
| Q921H8 | THIKA | 0,915590096 | 1,121851431 | 0,993292071 | 0,969266401 | 0,836373071 | 0,892594872 | 0,878674384 | 0,827892833 | 1,367616363 | 0,960630305 | 0,757089 |
| P70398 | USP9X | 0,881472338 | 1,094566688 | 1,003308064 | 1,02065291  | 1,100573307 | 1,064379721 | 0,887325411 | 0,924719505 | 0,923323752 | 0,980064339 | 0,757476 |
| P36916 | GNL1  | 0,945882371 | 0,99025887  | 1,063909449 | 0,99994931  | 1,040938448 | 0,997063772 | 1,182467464 | 1,153845411 | 0,345189633 | 0,943900946 | 0,758483 |
| Q8K0T0 | RTN1  | 0,945328131 | 1,071086029 | 1,040917832 | 0,942668007 | 1,012931422 | 1,014111182 | 1,04222713  | 1,009335393 | 0,971791795 | 1,010079384 | 0,759018 |
| P46460 | NSF   | 0,90924377  | 1,038122184 | 1,02318898  | 1,029445066 | 1,046612897 | 0,954405242 | 0,997726321 | 0,983256804 | 1,075972862 | 1,011594825 | 0,760047 |
| Q64487 | PTPRD | 0,978168867 | 0,993478464 | 1,066406191 | 0,961946478 | 1,023896726 | 1,202370881 | 0,989751768 | 0,929416286 | 0,947835409 | 1,018654214 | 0,76071  |
| Q99NB9 | SF3B1 | 0,81811475  | 1,128698418 | 1,084072183 | 0,96911465  | 1,225874703 | 0,834397156 | 0,864694516 | 1,064110039 | 1,183666623 | 1,034548607 | 0,761435 |
| P62814 | VATB2 | 0,926176407 | 1,006686672 | 1,077330432 | 0,989806489 | 1,014971328 | 0,890334327 | 1,028008459 | 1,085304887 | 1,054636144 | 1,014651029 | 0,762458 |
| Q9CQM9 | GLRX3 | 1,02703328  | 1,053015986 | 0,936840358 | 0,983110376 | 1,047220887 | 1,007032246 | 1,064799358 | 0,979599669 | 0,952277985 | 1,010186029 | 0,763363 |
| Q8VCN9 | TBCC  | 0,883083931 | 1,057497136 | 1,037877108 | 1,021541825 | 1,069651589 | 1,039011047 | 0,969746949 | 1,015124012 | 0,808917047 | 0,980490129 | 0,764455 |
| Q91ZX7 | LRP1  | 0,920812806 | 1,119127447 | 1,003776302 | 0,956283444 | 1,017452693 | 1,008486877 | 0,93743413  | 0,953677825 | 1,017476096 | 0,986905524 | 0,767665 |
| Q8CGP1 | H2B1K | 0,82370748  | 1,098121065 | 0,968061808 | 1,110109647 | 0,893642532 | 1,028170927 | 1,244073047 | 0,954701141 | 1,015461332 | 1,027209796 | 0,769516 |
| Q91WJ8 | FUBP1 | 0,801400335 | 0,948099479 | 1,075925179 | 1,174575008 | 0,999852311 | 0,790625102 | 0,996990592 | 0,953019925 | 1,118137259 | 0,971725038 | 0,769818 |
| O88685 | PRS6A | 0,956858865 | 0,959614671 | 1,084026611 | 0,999499853 | 0,979549264 | 0,873167842 | 1,223946413 | 1,10880366  | 0,930934922 | 1,02328042  | 0,769821 |
| Q04690 | NF1   | 0,768858823 | 1,107880048 | 1,034426998 | 1,088834132 | 1,050606755 | 0,862677576 | 1,045036373 | 1,090425798 | 1,077231094 | 1,025195519 | 0,771715 |
| Q8VE33 | GD1L1 | 0,847328413 | 1,052494201 | 1,082874074 | 1,017303311 | 1,041877897 | 0,919958447 | 0,956346357 | 0,968122116 | 1,033688101 | 0,983998584 | 0,772676 |
| Q64331 | MYO6  | 0,939361395 | 1,098195089 | 0,948930081 | 1,013513434 | 1,05410292  | 1,331542917 | 1,06983501  | 1,10174102  | 0,068559457 | 0,925156265 | 0,774636 |
| Q9QYB8 | ADDB  | 0,925671583 | 1,077328192 | 0,994455431 | 1,002544795 | 1,087794078 | 0,935991146 | 0,977497959 | 0,992769938 | 1,068509186 | 1,012512461 | 0,775895 |
| Q924N4 | S12A6 | 1,023262516 | 1,02408107  | 0,996983642 | 0,955672771 | 0,949243039 | 0,875158934 | 1,072716979 | 1,018523778 | 1,023224411 | 0,987773428 | 0,776383 |
| P61022 | CHP1  | 1,004619341 | 0,975995194 | 1,005908699 | 1,013476766 | 1,019844227 | 0,954123917 | 1,085028824 | 1,052725665 | 0,804789409 | 0,983302408 | 0,776981 |
| Q9DB72 | BTBDH | 1,14597759  | 0,988166578 | 0,84471612  | 1,021139713 | 1,31384994  | 0,759636143 | 1,068026634 | 1,084687162 | 0,944008781 | 1,034041732 | 0,778755 |
| Q8VBW6 | ULA1  | 0,922603014 | 1,003874243 | 1,046549307 | 1,026973435 | 1,207521427 | 0,8925053   | 0,951715637 | 0,823747946 | 1,010897197 | 0,977277501 | 0,779043 |
| O09061 | PSB1  | 1,042572985 | 0,93156122  | 0,988493109 | 1,037372687 | 0,966002628 | 0,915007983 | 1,045244693 | 1,099642955 | 1,036954872 | 1,012570626 | 0,779221 |
| P55264 | ADK   | 0,99532032  | 0,864400113 | 1,051204392 | 1,089075175 | 0,998362005 | 1,093493626 | 1,019731182 | 0,945596073 | 0,852222696 | 0,981881116 | 0,781145 |
| Q99JY9 | ARP3  | 0,859091889 | 1,032442875 | 1,006062326 | 1,10240291  | 0,962324972 | 0,906070376 | 1,038735487 | 1,085999617 | 1,094235112 | 1,017473113 | 0,782904 |
| O88643 | PAK1  | 0,96492552  | 1,066506885 | 1,001861532 | 0,966706063 | 1,117313226 | 1,028544793 | 0,941082103 | 0,945627601 | 0,897537415 | 0,986021028 | 0,783522 |
| Q62421 | SH3G3 | 1,14984775  | 0,957745683 | 0,933971723 | 0,958434844 | 1,155936664 | 0,886844998 | 0,936498084 | 0,970932482 | 0,952196397 | 0,980481725 | 0,783527 |
| Q9QUR6 | PPCE  | 1,319358319 | 1,252784787 | 0,086016927 | 1,341839967 | 1,318534814 | 1,078884125 | 0,911118419 | 1,01163073  | 1,076015758 | 1,079236769 | 0,784397 |
| Q8R001 | MARE2 | 0,9001837   | 1,116797012 | 0,890640883 | 1,092378404 | 1,169561811 | 0,861350552 | 0,993415943 | 0,965833429 | 0,896084698 | 0,977249287 | 0,786353 |
| Q9Z0S1 | BPNT1 | 0,863529689 | 0,96083628  | 1,063794963 | 1,111839068 | 1,019933142 | 0,809362745 | 1,021195473 | 1,287391172 | 1,001601929 | 1,027896892 | 0,786371 |
| Q80SW1 | SAHH2 | 0,996362177 | 1,007704663 | 0,927219883 | 1,068713276 | 0,957624686 | 1,113660476 | 1,038490777 | 0,974722325 | 0,832983307 | 0,983496314 | 0,786449 |
| P19253 | RL13A | 0,786005486 | 0,96783917  | 1,13675759  | 1,109397755 | 0,868026656 | 1,031146502 | 1,091797502 | 0,929022061 | 0,962873673 | 0,976573279 | 0,786707 |
| Q91V14 | S12A5 | 0,934770199 | 1,015492333 | 1,069751957 | 0,979985511 | 1,090874915 | 0,955567907 | 0,938762451 | 0,940139303 | 1,016637308 | 0,988396377 | 0,788397 |



|        |       |             |             |             |             |             |             |             |             |             |             |          |
|--------|-------|-------------|-------------|-------------|-------------|-------------|-------------|-------------|-------------|-------------|-------------|----------|
| Q9EQ20 | MMSA  | 1,090898325 | 1,027507176 | 0,864537916 | 1,017056583 | 0,925476889 | 1,018359322 | 1,085635583 | 1,07569717  | 0,970795439 | 1,015192881 | 0,788721 |
| P52503 | NDUS6 | 1,018629706 | 1,140790828 | 0,877084564 | 0,963494902 | 0,236819661 | 1,365148351 | 1,282026716 | 0,990673305 | 0,800913019 | 0,93511621  | 0,789435 |
| P61021 | RAB5B | 1,033703633 | 1,052561486 | 0,961438961 | 0,952295919 | 1,026703372 | 1,207878562 | 1,226071412 | 0,999866483 | 0,692443277 | 1,030592621 | 0,791308 |
| Q9WV92 | E41L3 | 1,064044035 | 1,064849681 | 0,908030555 | 0,963075728 | 1,088433896 | 1,070998469 | 0,997153431 | 0,935069533 | 0,973592823 | 1,01304963  | 0,791349 |
| Q4ACU6 | SHAN3 | 1,066646462 | 0,807795026 | 0,992462059 | 1,133096452 | 1,113443551 | 0,467579842 | 0,809466818 | 0,881061013 | 1,458408185 | 0,945991882 | 0,791512 |
| P52760 | UK114 | 0,894720862 | 1,031141495 | 1,025696486 | 1,048441157 | 0,932043184 | 1,342590393 | 1,081111988 | 1,003379089 | 0,789309383 | 1,029686807 | 0,792554 |
| P50580 | PA2G4 | 0,905044042 | 0,966534748 | 1,088786856 | 1,039634355 | 0,97514605  | 0,966607075 | 1,081651477 | 1,106584806 | 0,94075676  | 1,014149233 | 0,79291  |
| P62849 | RS24  | 0,754238415 | 1,070359135 | 1,213952804 | 0,961449646 | 0,843243723 | 1,036940723 | 1,061071979 | 1,034895227 | 0,889291239 | 0,973088578 | 0,793377 |
| Q8BIJ6 | SYIM  | 1,010132021 | 1,084639524 | 0,95680347  | 0,948424986 | 0,984347835 | 1,016240384 | 0,962934356 | 0,912124528 | 1,069484885 | 0,989026398 | 0,794666 |
| O54991 | CNTP1 | 1,031119433 | 1,106553234 | 0,836115002 | 1,026212331 | 0,962362915 | 1,114269862 | 0,994298149 | 1,03242663  | 0,976454993 | 1,01596251  | 0,79556  |
| Q60829 | PPR1B | 1,231298951 | 0,875939144 | 1,166934078 | 0,725827827 | 0,994462807 | 0,827320043 | 0,865067355 | 0,126996466 | 1,764468665 | 0,915663067 | 0,795811 |
| Q8VD33 | SGTB  | 1,082688084 | 1,033881439 | 0,92734836  | 0,956082118 | 1,072069232 | 0,968928635 | 0,955781188 | 1,055382938 | 0,880264869 | 0,986485372 | 0,797024 |
| P56376 | ACYP1 | 0,711938237 | 0,994709745 | 1,114530219 | 1,178821798 | 0,920572041 | 0,976058186 | 1,196548449 | 1,022612603 | 1,023388354 | 1,027835927 | 0,798165 |
| P26516 | PSMD7 | 0,922008463 | 1,072333505 | 1,056634073 | 0,94902396  | 1,029818069 | 0,859953296 | 1,032512606 | 0,978303436 | 1,032658938 | 0,986649269 | 0,798254 |
| P14152 | MDHC  | 1,022822216 | 0,976032609 | 0,96941683  | 1,031728345 | 1,04488915  | 1,001266317 | 1,025576905 | 0,995599195 | 0,887700523 | 0,991006418 | 0,798739 |
| P29391 | FRIL1 | 1,069824485 | 1,011255028 | 0,998829053 | 0,920091433 | 0,780596365 | 0,936641353 | 1,097471159 | 0,95723714  | 1,12863305  | 0,980115813 | 0,800693 |
| Q9Z268 | RASL1 | 0,908267797 | 0,913079394 | 1,13816057  | 1,040492239 | 1,114208202 | 0,927502103 | 0,927627687 | 0,997409837 | 1,123615721 | 1,01807271  | 0,800697 |
| Q06185 | ATP5I | 0,780664432 | 1,104730333 | 1,133492121 | 0,981113114 | 0,804245877 | 0,936870225 | 1,107810637 | 1,035875274 | 0,996038795 | 0,976168162 | 0,801568 |
| P48771 | CX7A2 | 0,950605448 | 1,043781714 | 1,105576065 | 0,900036773 | 0,865927564 | 1,01121432  | 1,077257881 | 1,172109458 | 0,96415253  | 1,018132351 | 0,806264 |
| P09103 | PDIA1 | 0,965522963 | 1,063267381 | 0,965097985 | 1,006111671 | 1,093571186 | 0,684121859 | 1,101185929 | 0,920920089 | 1,082924521 | 0,976544717 | 0,808859 |
| Q07076 | ANXA7 | 1,141630947 | 0,882861436 | 1,050691493 | 0,924816125 | 0,995123106 | 0,954310427 | 0,98214078  | 1,055126524 | 0,942441678 | 0,985828503 | 0,809386 |
| P62320 | SMD3  | 0,801798855 | 1,126802008 | 1,102941096 | 0,968458041 | 0,933179323 | 0,856780948 | 1,142820351 | 1,1652997   | 1,01915394  | 1,023446852 | 0,810065 |
| Q8VCW8 | ACSF2 | 0,879065494 | 1,189698976 | 0,969771911 | 0,961463619 | 0,861902374 | 1,089382095 | 1,0470966   | 0,799731905 | 1,08942803  | 0,977508201 | 0,811192 |
| P70414 | NAC1  | 0,953949091 | 1,082701648 | 0,890586808 | 1,072762453 | 1,106967594 | 1,022177049 | 1,002806259 | 1,013649939 | 0,920107287 | 1,013141625 | 0,811659 |
| Q8BLF1 | NCEH1 | 1,130040166 | 0,909685222 | 1,045327899 | 0,914946713 | 0,869200731 | 0,820743974 | 1,076256465 | 1,231978229 | 1,122377885 | 1,024111457 | 0,816226 |
| P42125 | ECI1  | 1,105800225 | 1,028424489 | 0,932050148 | 0,933725137 | 0,950185453 | 1,187726344 | 1,067792864 | 0,912919875 | 0,96234699  | 1,016194305 | 0,817451 |
| O88737 | BSN   | 0,872964259 | 1,029841434 | 1,295267945 | 0,801926362 | 1,139732454 | 1,069102849 | 0,74545501  | 0,790690898 | 1,09556734  | 0,96810971  | 0,81905  |
| Q8C5W0 | CLMN  | 1,146587388 | 0,944841018 | 0,793384714 | 1,11518688  | 1,089915145 | 0,884831498 | 0,956645894 | 1,074730731 | 0,890059754 | 0,979236605 | 0,819323 |
| P62743 | AP2S1 | 0,823591907 | 1,003629671 | 1,191180033 | 0,98159839  | 0,907268225 | 1,028244902 | 1,123214727 | 1,125543987 | 0,916573514 | 1,020169071 | 0,819935 |
| Q80YN3 | BCAS1 | 1,114827013 | 1,094780831 | 0,749417131 | 1,040975026 | 1,078857309 | 0,997239075 | 1,002749373 | 1,00903501  | 1,002643386 | 1,018104831 | 0,819972 |
| P56399 | UBP5  | 0,981938669 | 1,029164557 | 1,012945451 | 0,975951323 | 0,959765197 | 0,977384004 | 0,990445998 | 1,019812772 | 1,084267108 | 1,006335016 | 0,821956 |
| Q9Z0L0 | TPBG  | 1,073929205 | 0,981331056 | 1,080332019 | 0,86440772  | 0,981835518 | 0,774745176 | 0,754839513 | 1,202668578 | 1,152710358 | 0,973359829 | 0,822137 |
| P84084 | ARF5  | 0,758788798 | 1,202525277 | 0,925483538 | 1,113202387 | 1,032830304 | 1,386512728 | 1,223021313 | 0,026168603 | 1,004826282 | 0,934671846 | 0,823969 |
| Q9Z204 | HNRPC | 0,94332172  | 0,987272589 | 1,029636734 | 1,039768957 | 1,008604636 | 0,890476326 | 0,993808678 | 1,076425737 | 1,080797232 | 1,010022522 | 0,825451 |
| Q91YS8 | KCC1A | 0,894888025 | 1,02936363  | 1,070753982 | 1,004994363 | 1,148353149 | 1,005288951 | 0,933649539 | 0,993094582 | 0,979681574 | 1,012013559 | 0,826029 |
| Q8C419 | GP158 | 1,024096361 | 0,957034555 | 1,068104247 | 0,950764838 | 0,896947993 | 1,095927036 | 0,992164993 | 1,032612418 | 1,033106578 | 1,010151804 | 0,826651 |
| Q8BMG7 | RBGPR | 0,894736591 | 1,094607734 | 1,024757696 | 0,98589798  | 1,010427649 | 0,923528378 | 1,047859521 | 0,983116959 | 0,986405569 | 0,990267615 | 0,828354 |
| Q8BWG8 | ARRB1 | 0,96437009  | 0,961367953 | 1,094102319 | 0,980159637 | 0,973484624 | 0,816029778 | 1,018834344 | 1,109636817 | 1,013471479 | 0,986291408 | 0,829032 |
| Q99PV0 | PRP8  | 1,17719874  | 1,192350918 | 1,287382972 | 0,343067371 | 1,176571327 | 0,380882702 | 1,019320998 | 1,036310076 | 1,104075704 | 0,943432161 | 0,829283 |
| Q9D172 | ES1   | 0,998205719 | 1,024023356 | 0,942816704 | 1,034954221 | 1,038093509 | 1,16904535  | 1,006007723 | 0,969334074 | 0,880532924 | 1,012602716 | 0,829687 |

|        |          |             |             |             |             |             |             |             |             |             |             |          |
|--------|----------|-------------|-------------|-------------|-------------|-------------|-------------|-------------|-------------|-------------|-------------|----------|
| O35927 | CTND2    | 1,111508929 | 1,098057168 | 0,811008146 | 0,979425757 | 1,205499914 | 0,511420893 | 0,999709479 | 1,097694446 | 1,020347566 | 0,96693446  | 0,830297 |
| Q80WM4 | HPLN4    | 0,852358662 | 1,132701953 | 0,962201567 | 1,052737818 | 0,883421324 | 1,063762069 | 1,053838304 | 1,011146755 | 0,913392151 | 0,985112121 | 0,831512 |
| Q9Z0P4 | PALM     | 0,840726018 | 1,035784514 | 1,098999241 | 1,024490227 | 1,06432552  | 0,919922064 | 0,987050947 | 1,030804074 | 1,061225646 | 1,01266565  | 0,832317 |
| I00001 | GFP_MALE | 1,206963216 | 0,910522841 | 1,054719147 | 0,827794796 | 0,955908484 | 1,107179208 | 0,904524833 | 1,032411694 | 1,094057753 | 1,018816394 | 0,832417 |
| Q9DBC7 | KAPO     | 1,129167637 | 0,960273484 | 0,97352405  | 0,937034829 | 1,120385077 | 0,9033154   | 0,996418968 | 1,098311672 | 0,947312932 | 1,01314881  | 0,836142 |
| Q62048 | PEA15    | 0,773118126 | 1,003399398 | 1,127228526 | 1,096253949 | 0,779358807 | 0,863382688 | 1,155800995 | 1,074440217 | 1,01468976  | 0,977534493 | 0,836816 |
| Q9DCW4 | ETFB     | 1,076383385 | 0,973023662 | 0,960189373 | 0,990403579 | 0,951922044 | 1,184396002 | 1,036144694 | 0,941494359 | 0,946861714 | 1,012163763 | 0,83839  |
| O88696 | CLPP     | 0,972282643 | 0,98725372  | 1,052586457 | 0,98787718  | 0,990761032 | 1,083987601 | 0,999036265 | 0,971925277 | 0,918666653 | 0,992875366 | 0,840643 |
| Q78PY7 | SND1     | 0,866765075 | 1,016175718 | 1,01727678  | 1,099782428 | 0,944314793 | 0,955463599 | 1,119596918 | 0,972459167 | 1,068461507 | 1,012059197 | 0,841281 |
| Q5SYD0 | MYO1D    | 1,08690295  | 1,143585561 | 0,854093179 | 0,91541831  | 1,003331071 | 0,93453132  | 1,077521579 | 1,093325117 | 0,963814195 | 1,014504656 | 0,8414   |
| P62908 | RS3      | 0,954402193 | 0,975702475 | 1,018116231 | 1,051779101 | 1,025429011 | 1,049360883 | 0,788054615 | 1,037787628 | 1,037327536 | 0,987591935 | 0,841682 |
| Q9D0E1 | HNRPM    | 0,910971148 | 1,065456301 | 1,075395199 | 0,948177351 | 0,96241525  | 0,956865356 | 0,912452913 | 1,042309077 | 1,074950038 | 0,989798527 | 0,843173 |
| P97370 | AT1B3    | 1,131495734 | 1,017522658 | 0,867485142 | 0,983496466 | 1,057579941 | 1,067922751 | 1,065445262 | 1,013240749 | 0,861526272 | 1,013142995 | 0,84598  |
| P15105 | GLNA     | 0,952963103 | 0,976803672 | 1,006792904 | 1,063440322 | 0,997729202 | 0,994436449 | 1,050844828 | 0,994319744 | 0,932618368 | 0,993989718 | 0,84601  |
| Q9D6K5 | SYJ2B    | 0,925454139 | 0,97334114  | 1,088946351 | 1,01225837  | 1,019051118 | 0,997265025 | 1,122855691 | 0,969462258 | 0,829604224 | 0,987647663 | 0,846735 |
| P56480 | ATPB     | 1,028230897 | 0,997536001 | 0,98828314  | 0,985949962 | 0,994555719 | 0,94603833  | 0,994407762 | 1,023739923 | 1,023118687 | 0,996372085 | 0,847523 |
| P24549 | AL1A1    | 1,163417697 | 0,870978827 | 0,902670944 | 1,062932532 | 1,025343971 | 0,783221736 | 0,985361089 | 1,161919433 | 1,139487307 | 1,019066707 | 0,850819 |
| P62737 | ACTA     | 0,790322231 | 1,210268681 | 1,289281413 | 0,710127675 | 0,974873337 | 1,47644458  | 1,163956056 | 0,821682508 | 0,75369434  | 1,038130164 | 0,851033 |
| Q9Z130 | HNRDL    | 0,796994624 | 1,011566137 | 1,040082771 | 1,151356467 | 1,080175186 | 0,79418926  | 1,009259417 | 1,069279588 | 0,961700812 | 0,982920853 | 0,851061 |
| F8VPU2 | FARP1    | 0,95530213  | 1,060435287 | 1,05233899  | 0,931923593 | 1,032138894 | 1,096776594 | 1,006076224 | 0,870352431 | 0,944147202 | 0,989898269 | 0,852885 |
| Q80UG5 | SEPT9    | 1,030238848 | 0,986658288 | 1,020613314 | 0,96248955  | 1,16959846  | 0,858168967 | 1,039649209 | 0,96933961  | 1,01992601  | 1,011336451 | 0,85298  |
| Q61330 | CNTN2    | 1,141238605 | 1,110922004 | 1,004899276 | 0,742940114 | 1,119766635 | 1,066721386 | 1,097079971 | 1,052474687 | 0,767175353 | 1,020643606 | 0,853825 |
| P97300 | NPTN     | 0,963291102 | 0,894910625 | 1,124411641 | 1,017386632 | 1,059694659 | 0,881015256 | 0,923280583 | 0,947862451 | 1,124904427 | 0,987351475 | 0,855074 |
| P10605 | CATB     | 0,872245498 | 0,94215976  | 1,112134981 | 1,073459761 | 1,052185809 | 1,093016942 | 1,068057103 | 0,877001958 | 0,836059985 | 0,985264359 | 0,85546  |
| Q3THG9 | AASD1    | 1,0418664   | 1,005259947 | 0,824839215 | 1,128034438 | 1,022429059 | 1,093097704 | 1,000395452 | 1,089977675 | 0,862695315 | 1,013719041 | 0,857224 |
| Q9WV55 | VAPA     | 0,928236303 | 0,996940616 | 1,070051615 | 1,004771467 | 0,972901954 | 1,052964297 | 1,069541198 | 0,983522111 | 0,954861363 | 1,006758185 | 0,857752 |
| Q99LC5 | ETFA     | 1,042163902 | 1,029046443 | 0,893515487 | 1,035274169 | 0,961961385 | 1,127890041 | 0,984347293 | 0,925473889 | 0,953272073 | 0,990588936 | 0,85898  |
| O88533 | DDC      | 1,0656082   | 0,989060358 | 0,965975961 | 0,979355482 | 0,838191044 | 0,659169248 | 0,959307972 | 1,247680757 | 1,18131653  | 0,97713311  | 0,859624 |
| Q9D880 | TIM50    | 0,943909613 | 1,272625249 | 0,989372855 | 0,794092283 | 1,068927077 | 1,388371765 | 0,988286656 | 0,699404568 | 0,992136391 | 1,027425291 | 0,862487 |
| P19783 | COX41    | 0,973004471 | 1,008048714 | 1,062095412 | 0,956851404 | 0,943862894 | 0,950287911 | 1,115003558 | 1,060892665 | 0,968642387 | 1,007737883 | 0,864571 |
| Q9JHU4 | DYHC1    | 0,960362575 | 1,048188224 | 1,020000882 | 0,97144832  | 1,117814947 | 1,006369613 | 0,92528106  | 0,954475256 | 0,958516866 | 0,992491548 | 0,864834 |
| Q9WUL7 | ARL3     | 0,983709378 | 1,107227847 | 1,055201045 | 0,85386173  | 1,141687834 | 0,971913224 | 0,992063201 | 1,070348436 | 0,88482152  | 1,012166843 | 0,865483 |
| Q9R1Q8 | TAGL3    | 1,118624183 | 0,945418312 | 0,837556758 | 1,098400747 | 1,027737802 | 1,13790743  | 1,109895576 | 1,061988148 | 0,748213131 | 1,017148418 | 0,866645 |
| Q61553 | FSCN1    | 1,060291882 | 0,970410634 | 0,992429073 | 0,976868411 | 1,024763485 | 0,976385494 | 0,997172506 | 1,050064439 | 0,925507504 | 0,994778686 | 0,867694 |
| Q8R1B4 | EIF3C    | 0,904088355 | 1,123533716 | 0,974362731 | 0,998015198 | 1,097117639 | 0,925340036 | 1,049913309 | 0,914450851 | 0,964152022 | 0,990194771 | 0,868547 |
| O55091 | IMPCT    | 0,928152964 | 0,980732168 | 1,040881261 | 1,050233606 | 0,879342335 | 0,929788421 | 1,130179323 | 1,003101271 | 1,01138558  | 0,990759386 | 0,869698 |
| Q91V41 | RAB14    | 0,959876366 | 0,979325218 | 1,027668635 | 1,033129781 | 0,984438232 | 0,948103317 | 1,097536139 | 1,025389382 | 0,973017627 | 1,005696939 | 0,870151 |
| Q9D0L7 | ARM10    | 1,054449765 | 0,935081535 | 0,969078262 | 1,041390438 | 0,065004715 | 0,890653061 | 1,322652025 | 1,214166254 | 1,282241223 | 0,954943456 | 0,871142 |
| Q9CRA7 | ATP5S    | 1,068459208 | 0,959993317 | 0,906627366 | 1,06492011  | 0,87523689  | 0,910839636 | 1,071231149 | 1,162175241 | 0,922167232 | 0,98833003  | 0,874932 |
| P63011 | RAB3A    | 1,030244408 | 0,939940572 | 0,977091103 | 1,052723916 | 1,084865751 | 1,091982815 | 0,815379944 | 1,02570767  | 1,031622482 | 1,009911732 | 0,87642  |

|        |       |             |             |             |             |             |             |             |             |             |             |          |
|--------|-------|-------------|-------------|-------------|-------------|-------------|-------------|-------------|-------------|-------------|-------------|----------|
| Q9WVLO | MAAI  | 1,289080287 | 0,25014217  | 1,253580971 | 1,207196571 | 0,891875363 | 1,165295949 | 1,072964977 | 0,995030314 | 0,682622725 | 0,961557866 | 0,876912 |
| Q9Z1S5 | SEPT3 | 1,038058039 | 0,99455285  | 0,978065921 | 0,98932319  | 1,123628523 | 0,9908618   | 0,964705829 | 1,013960648 | 0,868450936 | 0,992321547 | 0,877512 |
| Q9QYR6 | MAP1A | 0,965864615 | 1,042842936 | 0,999835698 | 0,991456751 | 1,053001434 | 1,039396711 | 0,962838635 | 0,952458724 | 0,970357052 | 0,995610511 | 0,878175 |
| P28740 | KIF2A | 0,926533555 | 1,083418609 | 0,957955551 | 1,032092284 | 1,032113467 | 0,960226786 | 1,039716694 | 0,996292346 | 0,999533628 | 1,005576584 | 0,878372 |
| P49312 | ROA1  | 0,880518817 | 0,989392173 | 1,024588671 | 1,105500339 | 1,108496042 | 0,898485033 | 1,091472711 | 1,035793267 | 0,916570809 | 1,010163572 | 0,878848 |
| P12787 | COX5A | 0,747740474 | 1,151837199 | 1,040913763 | 1,059508564 | 0,730811767 | 1,002823242 | 1,085220683 | 1,055807207 | 1,042763077 | 0,983485195 | 0,880735 |
| Q60605 | MYL6  | 0,954123078 | 1,16030113  | 0,797390953 | 1,088184839 | 0,838858227 | 1,095838544 | 1,173260273 | 0,991617699 | 0,9742695   | 1,014768849 | 0,881285 |
| O54988 | SLK   | 1,012516178 | 0,990137528 | 1,000596853 | 0,996749441 | 0,973374499 | 0,97855624  | 0,92929878  | 1,016662352 | 1,132534632 | 1,006085301 | 0,881474 |
| Q9CR16 | PPID  | 0,94181034  | 0,962017004 | 0,978112263 | 1,118060393 | 1,033452533 | 0,981527573 | 1,050983098 | 1,018964912 | 0,946613082 | 1,00630824  | 0,882435 |
| Q9JJV2 | PROF2 | 0,612074185 | 1,0039663   | 1,285747434 | 1,09821208  | 0,837690755 | 0,858224274 | 1,100934626 | 1,072017872 | 1,026210487 | 0,979015603 | 0,884556 |
| P28571 | SC6A9 | 1,179215489 | 1,059513363 | 0,784407606 | 0,976863542 | 1,158681218 | 1,065322256 | 0,988074818 | 0,925258746 | 0,928997839 | 1,013266976 | 0,885147 |
| Q8BLE7 | VGLU2 | 0,837387039 | 1,199862083 | 0,964690936 | 0,998059941 | 1,031867947 | 1,128523193 | 1,009941673 | 0,89551874  | 0,992624186 | 1,011695148 | 0,885591 |
| Q80UM3 | NAA15 | 0,848568532 | 1,143937264 | 0,941418213 | 1,066075991 | 1,055760832 | 0,959618878 | 0,934610729 | 1,116023715 | 0,877871123 | 0,988777056 | 0,885728 |
| O08530 | S1PR1 | 0,866409066 | 1,061864928 | 1,061914526 | 1,00981148  | 0,990529096 | 1,184143863 | 0,96263826  | 0,922735825 | 0,988195636 | 1,009648536 | 0,886963 |
| P54822 | PUR8  | 1,00803857  | 1,002136763 | 1,016132207 | 0,97369246  | 0,980053096 | 0,993618911 | 1,061074824 | 1,034641912 | 0,907934794 | 0,995464708 | 0,887112 |
| P57776 | EF1D  | 0,982759428 | 1,032698318 | 0,962683112 | 1,021859142 | 1,006939337 | 0,984353531 | 1,034709654 | 1,011148155 | 0,946919767 | 0,996814089 | 0,88964  |
| P58252 | EF2   | 0,911141795 | 1,095182295 | 0,972283723 | 1,021392187 | 1,017297488 | 1,01650537  | 1,004575131 | 0,930790346 | 1,06072998  | 1,005979663 | 0,890065 |
| Q99KF1 | TMED9 | 0,896387128 | 1,117031994 | 0,945460661 | 1,041120217 | 0,856438857 | 0,865962079 | 1,148681352 | 1,180970804 | 1,01090833  | 1,012592284 | 0,890873 |
| Q80XN0 | BDH   | 0,833554067 | 0,96645336  | 1,004276253 | 1,19571632  | 0,993718571 | 1,042669575 | 1,086790871 | 1,132579635 | 0,808539012 | 1,012859533 | 0,892075 |
| Q8K596 | NAC2  | 1,010759108 | 0,9242453   | 1,016321971 | 1,048673621 | 1,131189385 | 0,926466727 | 0,945591898 | 0,944732758 | 1,088408855 | 1,007277925 | 0,895796 |
| P62281 | RS11  | 0,953417768 | 0,888486764 | 1,148400909 | 1,009694559 | 0,791861405 | 1,055478492 | 1,278260997 | 0,92830702  | 1,015585001 | 1,013898583 | 0,89644  |
| P43277 | H13   | 0,837415335 | 0,966624973 | 1,039249603 | 1,156710089 | 0,867726232 | 1,099364906 | 1,016752669 | 0,950349322 | 1,118701774 | 1,01057898  | 0,897352 |
| O35683 | NDUA1 | 0,871380681 | 1,064214119 | 1,009275114 | 1,055130087 | 0,903962306 | 0,894049728 | 1,117566035 | 1,10130252  | 1,027203016 | 1,008816721 | 0,89817  |
| O08749 | DLDH  | 1,011773799 | 1,051500291 | 0,96576027  | 0,97096564  | 1,027706665 | 0,981227912 | 0,973509476 | 1,012985951 | 0,991005025 | 0,997287006 | 0,900703 |
| P34884 | MIF   | 0,76593075  | 0,998193773 | 1,198599999 | 1,037275478 | 0,788940814 | 1,095100859 | 1,030636154 | 1,081830802 | 1,067139572 | 1,01272964  | 0,903807 |
| P97765 | WBP2  | 0,895059104 | 0,97511084  | 1,027213893 | 1,102616163 | 1,159996688 | 1,008253647 | 1,019137709 | 0,923554424 | 0,8449868   | 0,991185853 | 0,904695 |
| P10852 | 4F2   | 0,981493861 | 1,067754767 | 0,920571361 | 1,030180011 | 1,084708311 | 0,84834457  | 1,0150819   | 1,017081222 | 1,002320313 | 0,993507263 | 0,904794 |
| Q8BVI4 | DHPR  | 1,105012761 | 1,024633998 | 0,874278469 | 0,996074771 | 1,103162511 | 0,986508278 | 1,113073795 | 0,993818004 | 0,750882938 | 0,989489105 | 0,905155 |
| O88485 | DC1I1 | 0,934551474 | 1,089268683 | 1,012596644 | 0,963583198 | 1,068267271 | 0,912543766 | 1,038983095 | 0,981895997 | 1,024625752 | 1,005263176 | 0,905365 |
| Q8VE70 | PDC10 | 0,934979911 | 1,002737014 | 1,027423074 | 1,034860001 | 0,97900914  | 0,976172375 | 0,99285323  | 1,090736741 | 0,939740226 | 0,995702342 | 0,905671 |
| P09671 | SODM  | 1,065079157 | 1,018652826 | 0,948266808 | 0,96800121  | 1,041843125 | 1,105297395 | 1,004693498 | 0,909130401 | 0,909097267 | 0,994012337 | 0,906347 |
| P12023 | A4    | 0,989182505 | 0,969820892 | 1,015597069 | 1,025399533 | 1,073898883 | 0,895000237 | 1,003539813 | 0,840686955 | 1,147515954 | 0,992128368 | 0,906677 |
| P46471 | PRS7  | 0,930235394 | 0,988260141 | 1,096065155 | 0,985439309 | 1,088573237 | 0,915588073 | 1,028420512 | 0,998530057 | 0,94111271  | 0,994444918 | 0,908134 |
| Q9QUR7 | PIN1  | 0,888672882 | 1,00436056  | 1,02884026  | 1,078126299 | 0,96566869  | 1,00817318  | 1,016309707 | 1,039946047 | 0,992432582 | 1,004506041 | 0,908836 |
| Q9WTR5 | CAD13 | 0,910298334 | 1,016498656 | 1,094194229 | 0,979008781 | 1,16919861  | 0,958990036 | 0,96811442  | 1,005783472 | 0,932144525 | 1,006846213 | 0,91023  |
| Q810U4 | NRCAM | 0,978861792 | 1,077780253 | 1,119154474 | 0,824203481 | 0,86620982  | 1,060121029 | 1,04287885  | 0,981418598 | 1,091948374 | 1,008515334 | 0,910679 |
| P17809 | GTR1  | 1,117730706 | 1,025280347 | 0,920232884 | 0,936756063 | 1,046833216 | 1,077457334 | 0,968842572 | 0,9919381   | 0,943013643 | 1,005616973 | 0,911758 |
| Q5M8N0 | CNRP1 | 0,867889772 | 0,95220819  | 1,176346602 | 1,003555436 | 1,076832985 | 0,925638351 | 1,046330221 | 0,93333203  | 1,056822371 | 1,007791191 | 0,911918 |
| Q61753 | SERA  | 1,006655571 | 1,07777454  | 0,957759502 | 0,957810387 | 1,015212294 | 1,010164966 | 1,031755225 | 1,04461877  | 0,918473816 | 1,004045014 | 0,912375 |
| P80316 | TCPE  | 0,987005386 | 1,075503705 | 0,947373463 | 0,990117446 | 1,067808897 | 0,962449066 | 0,967267975 | 1,020483611 | 0,963157706 | 0,996233451 | 0,913795 |

|        |       |             |             |             |             |             |             |             |             |             |             |          |
|--------|-------|-------------|-------------|-------------|-------------|-------------|-------------|-------------|-------------|-------------|-------------|----------|
| P16054 | KPCE  | 1,027781653 | 0,87564191  | 1,014993847 | 1,08158259  | 1,026285144 | 0,781477617 | 1,050684223 | 0,985343703 | 1,114820431 | 0,991722223 | 0,915061 |
| Q61656 | DDX5  | 0,896312724 | 0,999737025 | 1,081195359 | 1,022754892 | 1,053002074 | 0,824208319 | 1,053960728 | 0,985925649 | 1,050890714 | 0,993597497 | 0,918782 |
| P84086 | CPLX2 | 0,99479224  | 0,8890208   | 0,946170885 | 1,170016075 | 0,899472753 | 0,982142683 | 1,131563201 | 0,934500195 | 1,090635046 | 1,007662776 | 0,919918 |
| Q8VHJ5 | MARK1 | 0,996570927 | 0,935191939 | 1,097702206 | 0,970534928 | 1,209240234 | 0,828441462 | 1,085465195 | 0,849875958 | 1,073186428 | 1,009241855 | 0,920012 |
| P52480 | KPYM  | 0,995838267 | 1,060403038 | 0,945036261 | 0,998722434 | 1,040726619 | 0,9753886   | 1,002965961 | 1,0024014   | 0,990945513 | 1,002485619 | 0,920675 |
| Q9Z1L5 | CA2D3 | 1,128042936 | 0,943802786 | 1,053693606 | 0,874460671 | 0,922496018 | 1,049041944 | 0,856920475 | 0,989224847 | 1,227297376 | 1,008996132 | 0,920782 |
| Q9CZU6 | CISY  | 1,005545646 | 1,036407336 | 0,968680606 | 0,989366413 | 1,035145153 | 0,969666316 | 1,014005175 | 1,009891263 | 0,980638912 | 1,001869364 | 0,921855 |
| O70435 | PSA3  | 0,983289896 | 0,98222047  | 0,971702446 | 1,062787189 | 0,994487257 | 1,044800655 | 1,081972288 | 0,993396483 | 0,904616023 | 1,003854541 | 0,923232 |
| O09131 | GSTO1 | 0,926754151 | 1,059032016 | 0,951289542 | 1,062924291 | 0,945462064 | 0,914594113 | 1,023973606 | 1,11410385  | 1,026923014 | 1,005011329 | 0,923709 |
| Q8C8N2 | SCAI  | 0,8936166   | 1,123592434 | 0,895214585 | 1,087576381 | 1,225791242 | 0,945418409 | 1,222984421 | 0,123946087 | 1,355696341 | 0,9747673   | 0,924986 |
| Q9D6J5 | NDUB8 | 1,012622167 | 1,088950376 | 0,844004173 | 1,054423285 | 0,848952722 | 0,270491185 | 1,298731349 | 1,372939836 | 1,096785604 | 0,977580139 | 0,9252   |
| P84104 | SRSF3 | 0,764143212 | 1,084670953 | 1,081787623 | 1,069398213 | 0,915973393 | 0,950395385 | 1,113663677 | 0,943835409 | 1,038338385 | 0,99244125  | 0,927921 |
| Q80TB8 | VAT1L | 1,066385162 | 1,067644445 | 0,855315969 | 1,010654423 | 0,891589921 | 0,793230741 | 1,051349943 | 1,277048586 | 0,939308401 | 0,990505518 | 0,92959  |
| O08788 | DCTN1 | 0,846381217 | 1,141262331 | 1,036692651 | 0,9756638   | 1,034623856 | 1,088742942 | 0,771146097 | 1,006141975 | 1,060853144 | 0,992301603 | 0,929745 |
| Q8VD37 | SGIP1 | 0,960664357 | 1,036143019 | 0,975489565 | 1,027703059 | 1,114589277 | 0,915946176 | 0,90364334  | 0,959311422 | 1,082860435 | 0,99527013  | 0,930114 |
| Q6P9K8 | CSKI1 | 0,933418474 | 1,043064152 | 0,970500591 | 1,053016784 | 1,129930544 | 1,016385511 | 0,966602451 | 0,883069156 | 1,027649251 | 1,004727383 | 0,930519 |
| Q62318 | TIF1B | 0,72864094  | 1,103862555 | 1,190307035 | 0,977189469 | 0,715170547 | 0,956627783 | 0,949314235 | 1,112196598 | 1,330766363 | 1,012815105 | 0,932138 |
| Q9CR68 | UCRI  | 1,165500071 | 1,056079198 | 0,720290743 | 1,058129988 | 0,894821026 | 1,488907634 | 0,94858494  | 0,976127619 | 0,763143567 | 1,014316957 | 0,933051 |
| Q99NE5 | RIMS1 | 1,006832756 | 1,024892306 | 1,071295532 | 0,896979406 | 1,287805429 | 0,994307395 | 0,86397113  | 0,904032998 | 0,988401542 | 1,007703699 | 0,934386 |
| Q9CQ62 | DECR  | 1,054616155 | 0,973540722 | 1,016194323 | 0,9556488   | 0,925832731 | 1,025888392 | 1,127048821 | 1,101458766 | 0,789073897 | 0,993860521 | 0,9353   |
| Q9QYB5 | ADDG  | 0,957688266 | 1,074148816 | 1,026640272 | 0,941522646 | 0,995572051 | 1,0159668   | 0,984037569 | 0,929160851 | 1,060078683 | 0,996963191 | 0,935719 |
| O55042 | SYUA  | 0,260846975 | 1,131192572 | 1,399389998 | 1,208570454 | 0,925019518 | 0,983841657 | 1,023390274 | 1,038423419 | 1,123286113 | 1,018792196 | 0,935792 |
| O08919 | NUMBL | 0,790889908 | 1,001075927 | 1,118561489 | 1,089472675 | 1,034651626 | 0,916206006 | 1,030919694 | 0,935839803 | 1,113064071 | 1,00613624  | 0,93853  |
| Q2NL51 | GSK3A | 0,942598568 | 0,965959    | 1,120655547 | 0,970786884 | 1,030519075 | 0,943928729 | 1,057498571 | 1,017633979 | 0,967477917 | 1,003411654 | 0,938764 |
| P63037 | DNJA1 | 0,911351747 | 1,100508442 | 0,97927027  | 1,008869541 | 0,896486862 | 0,934907138 | 0,85476251  | 0,988172232 | 1,369392353 | 1,008744219 | 0,939267 |
| Q9DB20 | ATPO  | 1,033513185 | 0,949650944 | 1,059506162 | 0,957329709 | 0,955783957 | 0,98702446  | 0,993521607 | 1,052843077 | 1,022742713 | 1,002383163 | 0,939898 |
| Q6PHS9 | CA2D2 | 0,536115763 | 1,202542406 | 1,100594545 | 1,160747286 | 0,867092501 | 1,036160246 | 0,615923618 | 1,0860863   | 1,321473003 | 0,985347134 | 0,94104  |
| O08532 | CA2D1 | 0,846662976 | 1,044181065 | 1,099623823 | 1,009532136 | 0,965494    | 1,024799805 | 0,987047427 | 0,988500671 | 1,015571334 | 0,996282648 | 0,941967 |
| Q8VHL1 | SETD7 | 1,114202169 | 0,892808705 | 1,017453136 | 0,97553599  | 1,114919519 | 0,901539892 | 1,049865675 | 1,035059655 | 0,874334929 | 0,995143934 | 0,943391 |
| P35585 | AP1M1 | 0,978301584 | 1,05443113  | 0,972766734 | 0,994500552 | 1,027118271 | 0,904132826 | 1,031456999 | 0,946453643 | 1,076698872 | 0,997172122 | 0,944425 |
| Q8BIW1 | PRUNE | 0,963863274 | 0,961868429 | 1,1354192   | 0,938849097 | 0,798683738 | 1,013836693 | 1,077219595 | 0,958535097 | 1,124713272 | 0,994597679 | 0,944951 |
| Q11011 | PSA   | 0,957175404 | 1,050022676 | 1,018008147 | 0,974793774 | 1,044588936 | 0,931492775 | 0,99061442  | 0,965357343 | 1,080674128 | 1,00254552  | 0,945035 |
| A2A432 | CUL4B | 1,433614731 | 0,024680291 | 1,303081576 | 1,238623402 | 1,174174246 | 0,877346594 | 1,071986882 | 0,844362361 | 1,137528249 | 1,021079666 | 0,945549 |
| Q8CHT0 | AL4A1 | 0,852316911 | 1,044899352 | 1,118853711 | 0,983930025 | 0,365350754 | 1,28823849  | 1,109583239 | 1,135271929 | 1,035636022 | 0,986816087 | 0,946296 |
| Q8BGN3 | ENPP6 | 0,909182972 | 1,291525768 | 0,865960444 | 0,933330816 | 1,138424177 | 0,534499091 | 1,119036198 | 1,16367503  | 1,100209669 | 1,011168833 | 0,946545 |
| Q9EQ06 | DHB11 | 1,081880659 | 1,075814717 | 0,940542984 | 0,90176164  | 1,067810888 | 1,527171457 | 0,919691337 | 0,806218724 | 0,734810138 | 1,011140509 | 0,947956 |
| P80314 | TCPB  | 0,942639428 | 1,047616627 | 0,995925722 | 1,013818223 | 0,990781756 | 0,934789833 | 1,043726391 | 1,042270705 | 0,998451433 | 1,002004024 | 0,948207 |
| P62245 | RS15A | 0,926652212 | 1,099065383 | 1,005228762 | 0,969053643 | 1,065161867 | 1,020200053 | 1,134953098 | 0,928715308 | 0,871773371 | 1,004160739 | 0,948665 |
| O35633 | VIAAT | 0,922581612 | 1,126848606 | 0,950891858 | 0,999677924 | 0,906477704 | 1,048159647 | 1,02884262  | 1,057816661 | 0,941398623 | 0,996539051 | 0,949421 |
| Q91VR5 | DDX1  | 0,930113349 | 1,029107362 | 1,013738407 | 1,027040881 | 1,026816145 | 0,972494707 | 0,999420042 | 0,955469867 | 1,055270868 | 1,001894326 | 0,949868 |

|        |       |             |             |             |             |             |             |             |             |             |             |          |
|--------|-------|-------------|-------------|-------------|-------------|-------------|-------------|-------------|-------------|-------------|-------------|----------|
| O55013 | TPPC3 | 1,114975403 | 0,911520319 | 0,981104753 | 0,992399525 | 0,84138773  | 1,036253012 | 1,166270995 | 0,973322438 | 1,005149128 | 1,00447666  | 0,950795 |
| P62855 | RS26  | 0,442471905 | 1,234419068 | 1,232283171 | 1,090825856 | 0,881610243 | 1,013818053 | 1,099021075 | 1,143389411 | 0,804580563 | 0,988483869 | 0,95107  |
| P70704 | AT8A1 | 0,86601728  | 1,099377119 | 1,05027958  | 0,984326021 | 0,970489249 | 1,016466984 | 0,929487102 | 0,979527772 | 1,088563332 | 0,996906888 | 0,955713 |
| Q08331 | CALB2 | 0,726028184 | 1,153317861 | 0,996155768 | 1,124498187 | 1,031751573 | 1,061221324 | 1,089257348 | 0,993344858 | 0,85232583  | 1,005580187 | 0,956052 |
| P68368 | TBA4A | 1,068563788 | 0,9895767   | 1,019928298 | 0,921931214 | 0,785534332 | 1,149982027 | 0,877944998 | 0,98967885  | 1,171596772 | 0,994947396 | 0,956472 |
| P43275 | H11   | 0,823811318 | 1,025761337 | 1,017051526 | 1,133375819 | 0,874330253 | 0,913643537 | 1,213078209 | 0,985846646 | 1,037354659 | 1,004850661 | 0,957486 |
| P62192 | PRS4  | 0,859843809 | 1,111377712 | 1,094743455 | 0,934035023 | 1,041086536 | 0,948903905 | 1,104373882 | 0,834244245 | 1,051157087 | 0,995953131 | 0,959187 |
| Q5HZI9 | S2551 | 0,843644415 | 0,927580506 | 1,147398532 | 1,081376548 | 0,728372883 | 0,908828691 | 1,144575423 | 1,113648917 | 1,076254709 | 0,994336125 | 0,959435 |
| Q9WV18 | GABR1 | 0,983832957 | 1,125073737 | 0,826320735 | 1,064772571 | 1,225094676 | 0,511364345 | 0,912458471 | 1,412892232 | 0,889886259 | 0,990339196 | 0,959703 |
| Q9WUA2 | SYFB  | 0,925055929 | 1,08160613  | 1,059142994 | 0,934194947 | 1,091697904 | 1,047581405 | 1,021968355 | 0,851868762 | 1,002184379 | 1,003060161 | 0,959715 |
| P20152 | VIME  | 0,845991413 | 1,172285299 | 0,947311996 | 1,034411292 | 0,982931766 | 0,846454185 | 1,221224207 | 0,992444037 | 0,933661447 | 0,995343128 | 0,961459 |
| Q91W50 | CSDE1 | 1,031518202 | 1,054382244 | 0,894481838 | 1,019617716 | 1,004376846 | 0,887171943 | 0,988551485 | 1,034197249 | 1,098009797 | 1,002461464 | 0,962212 |
| Q8BLK3 | LSAMP | 0,870993355 | 1,040404532 | 1,037832517 | 1,050769597 | 0,935431758 | 0,995665995 | 1,035342527 | 0,968962364 | 1,075033519 | 1,002087233 | 0,965784 |
| P09405 | NUCL  | 0,937638644 | 1,034150261 | 1,054383214 | 0,97382788  | 1,031642686 | 0,924979571 | 0,975331866 | 0,961474212 | 1,116062994 | 1,001898266 | 0,967202 |
| O54865 | GCYB1 | 0,929129388 | 1,126723961 | 1,143248634 | 0,800898017 | 1,086247961 | 0,736506836 | 0,968269858 | 0,958469206 | 1,225970792 | 0,995092931 | 0,967629 |
| O88712 | CTBP1 | 0,965917195 | 0,990830771 | 1,031959931 | 1,011292103 | 1,081231509 | 0,922533738 | 1,018674672 | 0,931188955 | 1,038834551 | 0,998492685 | 0,968846 |
| Q99L43 | CDS2  | 1,208632606 | 1,300665314 | 0,411260725 | 1,079441355 | 1,304006846 | 1,243300286 | 0,405565925 | 0,944402968 | 1,153387303 | 1,010132666 | 0,96951  |
| Q80Z24 | NEGR1 | 0,88522595  | 0,960673693 | 1,202192041 | 0,951908316 | 1,031306577 | 0,921869852 | 0,940756968 | 1,009508029 | 1,083284039 | 0,997345093 | 0,970665 |
| Q9D1G1 | RAB1B | 0,892625049 | 1,081015837 | 1,054787192 | 0,971571922 | 1,054208342 | 1,012923172 | 0,892419756 | 1,010437736 | 1,021562542 | 0,99831031  | 0,97338  |
| Q93092 | TALDO | 0,975356888 | 1,011758051 | 0,94744084  | 1,065444221 | 1,120841329 | 1,018518204 | 1,017019042 | 0,986589091 | 0,847821028 | 0,998157739 | 0,974018 |
| Q55QX6 | CYFP2 | 1,021625668 | 0,965282925 | 1,052790656 | 0,96030075  | 1,040838272 | 1,022271752 | 0,952229176 | 0,92068469  | 1,058201483 | 0,998845074 | 0,975299 |
| Q9CPV4 | GLOD4 | 0,96636888  | 0,965955919 | 0,993249853 | 1,074425348 | 1,018712614 | 0,948798774 | 1,072138287 | 1,005839203 | 0,948979743 | 0,998893724 | 0,975425 |
| P70404 | IDHG1 | 0,965718622 | 0,994285771 | 0,985076817 | 1,05491879  | 1,013883587 | 0,981294298 | 1,04748987  | 0,988444029 | 0,972460076 | 1,000714372 | 0,97595  |
| Q9JLJ2 | AL9A1 | 1,019900908 | 1,025806528 | 0,969109199 | 0,985183365 | 0,925406211 | 1,091870102 | 1,082755292 | 1,020580816 | 0,886708874 | 1,001464259 | 0,976676 |
| Q9QYC0 | ADDA  | 0,917992401 | 1,094120238 | 1,013083941 | 0,97480342  | 1,026728757 | 0,930072945 | 0,970477933 | 0,974484531 | 1,105222373 | 1,001397308 | 0,977184 |
| P38647 | GRP75 | 0,805517226 | 1,137711757 | 1,003567119 | 1,053203898 | 1,010969034 | 1,045459647 | 0,81301224  | 1,004992002 | 1,115000403 | 0,997886665 | 0,980653 |
| Q6P9K9 | NRX3A | 1,002524085 | 1,076068171 | 0,947552559 | 0,973855185 | 1,100205029 | 0,956255049 | 0,977715912 | 0,937194545 | 1,033661404 | 1,001006388 | 0,981316 |
| P20917 | MAG   | 1,284431626 | 1,016826542 | 0,76547697  | 0,933264862 | 1,027895508 | 0,966216551 | 1,108116839 | 1,017657118 | 0,891511017 | 1,002279407 | 0,983027 |
| P11627 | L1CAM | 0,945586099 | 1,02315313  | 1,079171695 | 0,952089076 | 1,07417163  | 1,054534593 | 0,958114668 | 0,885768902 | 1,032518329 | 1,001021624 | 0,983738 |
| Q9QYG0 | NDRG2 | 1,017090354 | 1,084899803 | 0,91852322  | 0,979486624 | 0,994890678 | 1,238681702 | 0,941315174 | 0,948457974 | 0,868798004 | 0,998428707 | 0,984508 |
| Q5EBJ4 | ERMIN | 1,127132218 | 1,042931019 | 0,865034872 | 0,964901891 | 1,163390594 | 0,979307761 | 0,993624999 | 0,939952283 | 0,929566881 | 1,001168504 | 0,986883 |
| Q9DCJ5 | NDUA8 | 1,101984537 | 0,797497631 | 0,96437925  | 1,136138583 | 0,902953281 | 1,138387255 | 1,075334172 | 0,90190182  | 0,988528115 | 1,001420928 | 0,987287 |
| Q9CPY7 | AMPL  | 1,032846677 | 1,045663628 | 0,922514056 | 0,998975639 | 1,0145355   | 0,99087217  | 1,059610246 | 1,024733749 | 0,90718596  | 0,999387525 | 0,987529 |
| Q8VDP4 | CCAR2 | 0,836545682 | 1,061953872 | 0,990347989 | 1,111152457 | 1,026076321 | 0,920149523 | 1,01785196  | 0,996414963 | 1,042897218 | 1,000677997 | 0,990991 |
| Q8CGK7 | GNAL  | 0,695771961 | 0,803951401 | 1,635306339 | 0,864970298 | 1,116074306 | 0,211085851 | 0,814303106 | 1,394053894 | 1,481538881 | 1,003411208 | 0,991837 |
| P80318 | TCPG  | 0,926590433 | 1,040825447 | 1,020896066 | 1,011688054 | 0,99856674  | 0,928103365 | 1,033280827 | 1,046653936 | 0,991925175 | 0,999706009 | 0,992974 |
| P47738 | ALDH2 | 1,048920058 | 1,073084712 | 0,920964345 | 0,957030885 | 0,934037742 | 1,008799017 | 1,044964373 | 1,006100182 | 1,004849612 | 0,999750185 | 0,994924 |
| Q9CR57 | RL14  | 0,907658171 | 1,014548668 | 0,984839787 | 1,092953373 | 0,961647389 | 0,99052158  | 1,075519808 | 1,053205622 | 0,917912446 | 0,999761369 | 0,996095 |
| Q6P8X1 | SNX6  | 0,966412209 | 1,084461935 | 0,962298364 | 0,986827492 | 0,9626083   | 1,007330925 | 1,059716667 | 0,94957775  | 1,019931079 | 0,999832944 | 0,996199 |
| Q9D9V3 | ECHD1 | 1,028702035 | 1,026698384 | 0,924610675 | 1,019988906 | 1,08733949  | 1,058583149 | 1,039927856 | 0,946165862 | 0,869214159 | 1,000246103 | 0,996276 |

|        |       |             |             |             |             |             |             |             |             |             |             |          |
|--------|-------|-------------|-------------|-------------|-------------|-------------|-------------|-------------|-------------|-------------|-------------|----------|
| Q8K0U4 | HS12A | 1,07799004  | 1,019119713 | 0,86427283  | 1,038617417 | 1,090545947 | 0,927494726 | 0,983646077 | 1,044606852 | 0,952445981 | 0,999747917 | 0,996364 |
| P62305 | RUXE  | 0,715115664 | 1,08079334  | 1,236227485 | 0,967863512 | 0,811779877 | 0,833881929 | 1,097244349 | 1,107962409 | 1,150671582 | 1,000308029 | 0,998134 |
| O55234 | PSB5  | 0,900346357 | 1,023319257 | 1,041659309 | 1,034675077 | 1,004093422 | 1,011691113 | 1,091158411 | 0,994079838 | 0,899498316 | 1,00010422  | 0,998231 |
| P39054 | DYN2  | 0,903462129 | 1,089918529 | 0,923442997 | 1,083176345 | 1,350149569 | 1,178922991 | 1,223915287 | 1,188161873 | 0,05574861  | 0,999379666 | 0,998252 |
| Q9D8Y0 | EFHD2 | 1,177562947 | 0,947706558 | 0,90038841  | 0,974342085 | 1,14710328  | 1,019069345 | 0,979924534 | 0,997271564 | 0,856705346 | 1,000014814 | 0,999848 |
